# Supplementary material for: Gene expression profiling of leukemic cells and primary thymocytes predicts a signature for apoptotic sensitivity to glucocorticoids
Source: Springer Nature journal article supplement (doi:10.1186/1475-2867-7-18), 2007-11-28
Supplement: Additional file 1 [file 1475-2867-7-18-s1.pdf]

| Additional file 1: Gene expression signature for GC-sensitivity in CEM cells. |                                                                   |         |        |            |           |           |           |           |              |           |
|-------------------------------------------------------------------------------|-------------------------------------------------------------------|---------|--------|------------|-----------|-----------|-----------|-----------|--------------|-----------|
| Page 1                                                                        |                                                                   |         |        |            |           |           |           |           |              |           |
| GC-response                                                                   |                                                                   |         |        | Sensitive  | Sensitive | Sensitive | Sensitive | Sensitive | Resensitized | Resistant |
| Type of lymphoid cell                                                         |                                                                   |         |        | Thymocyte  | ALL       | ALL       | ALL       | ALL       | ALL          | ALL       |
| Name                                                                          | Description                                                       | Network | Opp. R | C57/BL6 Dx | C7-14 Dx  | C7-14 Z   | C1-6 Dx   | C1-15 Z   | C1-15 Dx+F   | C1-15 Dx  |
| ABCE1                                                                         | ATP-binding cassette, sub-family E (OABP), member 1               |         | •      | 1.3        | -1.5      | -2.0      | -1.7      | -1.3      | -1.2         | *         |
| AK2                                                                           | adenylate kinase 2                                                | ♦       |        | *          | -1.4      | -1.7      | -1.6      | -1.6      | -1.4         | *         |
| ARHGEF7                                                                       | Rho guanine nucleotide exchange factor (GEF) 7                    | ♦       | •      | -1.3       | 1.3       | 1.4       | 1.3       | 1.3       | 1.8          | 1.2       |
| BCL2L11                                                                       | BCL2-like 11 (apoptosis facilitator)                              | ♦       |        | 1.8        | 3.1       | 14.5      | 5.9       | 1.3       | 1.8          | *         |
| BTG1                                                                          | B-cell translocation gene 1, anti-proliferative                   |         |        | *          | 9.3       | 9.1       | 4.4       | 3.3       | 1.7          | 1.9       |
| BTG2                                                                          | BTG family, member 2                                              |         | •      | -1.2       | 3.1       | 2.9       | 2.3       | 1.3       | 1.3          | 1.4       |
| CALR                                                                          | calreticulin                                                      | ♦       |        | *          | -1.9      | -1.7      | -1.6      | -1.4      | -1.6         | -1.3      |
| CCNG2                                                                         | cyclin G2                                                         |         | •      | -1.3       | 2.3       | 1.6       | 1.3       | 1.3       | 1.4          | 1.3       |
| CD53                                                                          | CD53 antigen                                                      |         |        | *          | 3.1       | 3.4       | 3.2       | 1.5       | 1.8          | 1.4       |
| CDC6                                                                          | CDC6 cell division cycle 6 homolog (S. cerevisiae)                | ♦       |        | -1.2       | -1.3      | -1.2      | -1.5      | -1.3      | -1.3         | -1.3      |
| CHP                                                                           | calcium binding protein P22                                       |         | •      | -1.7       | 1.2       | 1.2       | 1.3       | 1.5       | 1.2          | *         |
| CXCR4                                                                         | chemokine (C-X-C motif) receptor 4                                |         |        | 1.3        | 1.3       | 1.3       | 1.5       | 1.5       | 3.1          | 1.3       |
| DDIT4                                                                         | DNA-damage-inducible transcript 4                                 | ♦       |        | 2.9        | 4.4       | 3.4       | 2.5       | 1.2       | 4.4          | 1.5       |
| DHODH                                                                         | dihydroorotate dehydrogenase                                      |         | •      | 1.3        | -1.9      | -2.4      | -2.0      | -1.5      | -1.2         | -1.3      |
| DKC1                                                                          | dyskeratosis congenita 1, dyskerin                                |         |        | *          | -1.7      | -2.3      | -1.3      | -1.4      | -1.2         | *         |
| DSCR1                                                                         | Down syndrome critical region gene 1                              |         |        | 1.3        | 5.0       | 8.2       | 4.8       | 1.4       | 1.6          | *         |
| EIF3S9                                                                        | eukaryotic translation initiation factor 3, subunit 9 eta, 116kDa |         |        | *          | -1.5      | -2.2      | -1.3      | -1.2      | -1.2         | *         |
| ENO2                                                                          | enolase 2 (gamma, neuronal)                                       |         |        | *          | -1.2      | -1.4      | -1.5      | -2.0      | -1.5         | -1.2      |
| FADS1                                                                         | fatty acid desaturase 1                                           |         |        | *          | -1.5      | -4.1      | -1.9      | -1.9      | -1.3         | -1.3      |
| FBN1                                                                          | fibrillin 1                                                       |         |        | *          | 1.6       | 1.2       | 1.2       | 1.2       | 1.4          | *         |
| FGFR1                                                                         | fibroblast growth factor receptor 1                               | ♦       |        | *          | 1.6       | 3.1       | 1.4       | 1.7       | 1.7          | 1.3       |
| FKBP4                                                                         | FK506 binding protein 4, 59kDa                                    | ♦       | •      | 1.3        | -1.9      | -2.1      | -1.3      | -1.5      | -1.6         | *         |
| FKBP5                                                                         | FK506 binding protein 5                                           | ♦       |        | 1.7        | 6.6       | 11.2      | 4.4       | 3.8       | 2.9          | 2.8       |
| FOXK2                                                                         | forkhead box K2                                                   |         |        | *          | -1.3      | -1.4      | -1.4      | -1.2      | -1.3         | *         |
| GLB1                                                                          | galactosidase, beta 1                                             |         |        | *          | 1.4       | 2.3       | 1.9       | 1.5       | 1.4          | 1.3       |
| GLRX                                                                          | glutaredoxin (thioltransferase)                                   |         |        | *          | 3.4       | 5.2       | 2.1       | 1.4       | 1.2          | 1.4       |
| GPR125                                                                        | G protein-coupled receptor 125                                    |         |        | *          | -1.8      | -1.5      | -1.6      | -1.4      | -1.3         | *         |
| GRAP2                                                                         | GRB2-related adaptor protein 2                                    |         |        | *          | 2.4       | 2.9       | 3.6       | 2.8       | 2.1          | 2.7       |
| GSK3B                                                                         | glycogen synthase kinase 3 beta                                   |         |        | *          | 1.6       | 1.9       | 1.2       | 1.8       | 1.2          | -1.2      |
| GTPBP6                                                                        | GTP binding protein 6 (putative)                                  |         |        | *          | -1.4      | -1.8      | -1.3      | -1.2      | -1.4         | *         |
| HDAC1                                                                         | histone deacetylase 1                                             | ♦       |        | -1.6       | -1.4      | -1.2      | -1.2      | -1.3      | -1.2         | -1.3      |
| HRAS                                                                          | v-Ha-ras Harvey rat sarcoma viral oncogene homolog                | ♦       |        | *          | -1.3      | -1.4      | -1.3      | -1.4      | -1.4         | *         |
| HSPE1                                                                         | heat shock 10kDa protein 1 (chaperonin 10)                        |         | •      | 1.3        | -1.8      | -2.1      | -2.1      | -1.5      | -1.3         | *         |

| Additional file 1: Gene expression signature for GC-sensitivity in CEM cells. |                                                                                     |         |        |            |           |           |           |           |              |           |
|-------------------------------------------------------------------------------|-------------------------------------------------------------------------------------|---------|--------|------------|-----------|-----------|-----------|-----------|--------------|-----------|
| Page 2                                                                        |                                                                                     |         |        |            |           |           |           |           |              |           |
| GC-response                                                                   |                                                                                     |         |        | Sensitive  | Sensitive | Sensitive | Sensitive | Sensitive | Resensitized | Resistant |
| Type of lymphoid cell                                                         |                                                                                     |         |        | Thymocyte  | ALL       | ALL       | ALL       | ALL       | ALL          | ALL       |
| Name                                                                          | Description                                                                         | Network | Opp. R | C57/BL6 Dx | C7-14 Dx  | C7-14 Z   | C1-6 Dx   | C1-15 Z   | C1-15 Dx+F   | C1-15 Dx  |
| ID1                                                                           | inhibitor of DNA binding 1, dominant negative helix-loop-helix protein              | ◆       |        | *          | -2.6      | -1.7      | -1.2      | -1.9      | -1.6         | -1.4      |
| IDH3A                                                                         | isocitrate dehydrogenase 3 (NAD+) alpha                                             |         |        | *          | -1.5      | -1.3      | -1.5      | -1.2      | -1.3         | *         |
| IDS                                                                           | iduronate 2-sulfatase (Hunter syndrome)                                             |         |        | *          | 1.4       | 1.9       | 1.2       | 1.5       | 1.4          | 1.3       |
| IFRD1                                                                         | interferon-related developmental regulator 1                                        | ◆       |        | -1.3       | -1.8      | -1.2      | -1.6      | -1.6      | -1.3         | *         |
| IL32                                                                          | interleukin 32                                                                      |         |        | *          | -1.5      | -1.9      | -1.9      | -1.4      | -1.6         | *         |
| IL10RB                                                                        | interleukin 10 receptor, beta                                                       |         |        | *          | 1.6       | 1.9       | 1.4       | 1.6       | 1.8          | -1.2      |
| IL7R                                                                          | interleukin 7 receptor                                                              | ◆       |        | 1.4        | 8.3       | 18.0      | 6.3       | 1.4       | 2.5          | *         |
| ILF3                                                                          | interleukin enhancer binding factor 3, 90kDa                                        |         |        | *          | -1.3      | -1.2      | -1.3      | -1.2      | -1.4         | *         |
| IMPDH1                                                                        | IMP (inosine monophosphate) dehydrogenase 1                                         |         |        | *          | -1.6      | -1.9      | -1.4      | -1.3      | -1.4         | *         |
| IQGAP2                                                                        | IQ motif containing GTPase activating protein 2                                     |         |        | *          | 1.4       | 1.9       | 1.9       | 1.8       | 1.9          | 1.3       |
| ITGA6                                                                         | integrin, alpha 6                                                                   | ◆       |        | *          | 5.0       | 10.2      | 2.4       | 6.6       | 2.8          | 1.6       |
| KIAA0020                                                                      | KIAA0020                                                                            |         |        | *          | -1.7      | -3.6      | -2.2      | -1.2      | -1.3         | *         |
| LRPPRC                                                                        | leucine-rich PPR-motif containing                                                   |         |        | *          | -1.8      | -1.4      | -1.7      | -1.3      | -1.3         | -1.3      |
| MAP4                                                                          | microtubule-associated protein 4                                                    | ◆       |        | -1.6       | -1.3      | -1.8      | -1.7      | -1.3      | -1.3         | *         |
| MARS                                                                          | methionine-tRNA synthetase                                                          |         |        | *          | -1.5      | -1.6      | -1.5      | -1.2      | -1.3         | *         |
| MEP50                                                                         | WD repeat domain 77                                                                 |         |        | *          | -1.7      | -1.4      | -1.8      | -1.5      | -1.3         | *         |
| MLX                                                                           | MAX-like protein X                                                                  |         |        | *          | -1.3      | -1.2      | -1.5      | -1.2      | -1.3         | *         |
| MPI                                                                           | mannose phosphate isomerase                                                         |         |        | *          | -1.3      | -1.7      | -1.4      | -1.4      | -1.2         | *         |
| MT1A                                                                          | metallothionein 1A (functional)                                                     | ◆       |        | *          | 1.3       | 1.3       | 2.2       | 1.4       | 1.4          | *         |
| MT1B                                                                          | metallothionein 1B (functional)                                                     |         |        | *          | 1.3       | 1.5       | 1.6       | 1.2       | 1.5          | *         |
| MT1X                                                                          | metallothionein 1X                                                                  |         |        | *          | 1.4       | 2.1       | 2.2       | 1.3       | 1.4          | *         |
| MTHFD1                                                                        | methylenetetrahydrofolate dehydrogenase (NADP+ dependent) 1                         | ◆       |        | *          | -1.4      | -1.9      | -1.5      | -1.5      | -1.2         | *         |
| MYC                                                                           | v-myc myelocytomatosis viral oncogene homolog (avian)                               | ◆       |        | -2.2       | -3.8      | -4.6      | -3.6      | -1.4      | -2.2         | *         |
| NFATC3                                                                        | nuclear factor of activated T-cells, cytoplasmic, calcineurin-dependent 3           |         |        | *          | -1.4      | -1.3      | -1.9      | -1.8      | -1.6         | *         |
| NFIL3                                                                         | nuclear factor, interleukin 3 regulated                                             |         |        | 6.4        | 6.0       | 7.4       | 3.6       | 1.6       | 2.1          | *         |
| NFKBIA                                                                        | nuclear factor of kappa light polypeptide gene enhancer in B-cells inhibitor, alpha | ◆       |        | 1.5        | 3.0       | 3.4       | 2.8       | 1.9       | 1.5          | 1.3       |
| NME1                                                                          | non-metastatic cells 1, protein (NM23A) expressed in                                | ◆       |        | *          | -1.5      | -2.2      | -1.6      | -1.4      | -1.3         | *         |
| NR3C1                                                                         | nuclear receptor subfamily 3, group C, member 1 (glucocorticoid receptor)           | ◆       | •      | -1.7       | 4.2       | 6.6       | 2.1       | 1.7       | 1.6          | *         |
| OGT                                                                           | O-linked N-acetylglucosamine (GlcNAc) transferase                                   | ◆       | •      | -1.5       | 1.3       | 1.7       | 2.0       | 1.6       | 1.3          | *         |
| PA2G4                                                                         | proliferation-associated 2G4, 38kDa                                                 |         | •      | 1.2        | -1.7      | -1.9      | -1.7      | -1.3      | -1.2         | *         |
| PARD3                                                                         | par-3 partitioning defective 3 homolog (C. elegans)                                 |         |        | *          | 1.6       | 1.7       | 1.4       | 1.3       | 1.4          | *         |
| PIAS2                                                                         | protein inhibitor of activated STAT, 2                                              | ◆       | •      | -2.3       | 1.2       | 1.4       | 1.5       | 2.0       | 1.3          | *         |
| PIK3R1                                                                        | phosphoinositide-3-kinase, regulatory subunit 1 (p85 alpha)                         | ◆       |        | *          | 2.5       | 2.4       | 1.7       | 2.0       | 1.9          | *         |

| Additional file 1: Gene expression signature for GC-sensitivity in CEM cells. |                                                                                |         |        |            |           |           |           |           |              |           |
|-------------------------------------------------------------------------------|--------------------------------------------------------------------------------|---------|--------|------------|-----------|-----------|-----------|-----------|--------------|-----------|
| Page 3                                                                        |                                                                                |         |        |            |           |           |           |           |              |           |
| GC-response                                                                   |                                                                                |         |        | Sensitive  | Sensitive | Sensitive | Sensitive | Sensitive | Resensitized | Resistant |
| Type of lymphoid cell                                                         |                                                                                |         |        | Thymocyte  | ALL       | ALL       | ALL       | ALL       | ALL          | ALL       |
| Name                                                                          | Description                                                                    | Network | Opp. R | C57/BL6 Dx | C7-14 Dx  | C7-14 Z   | C1-6 Dx   | C1-15 Z   | C1-15 Dx+F   | C1-15 Dx  |
| PPP2R5C                                                                       | protein phosphatase 2, regulatory subunit B (B56), gamma isoform               |         |        | *          | 1.5       | 1.7       | 1.5       | 1.4       | 1.2          | 1.2       |
| PRG1                                                                          | proteoglycan 1, secretory granule                                              |         |        | 1.6        | 2.6       | 4.5       | 3.2       | 1.2       | 1.9          | 1.6       |
| PTPN2                                                                         | protein tyrosine phosphatase, non-receptor type 2                              |         |        | *          | -1.3      | -1.3      | -2.1      | -1.2      | -1.3         | *         |
| RABGGTB                                                                       | Rab geranylgeranyltransferase, beta subunit                                    |         |        | -1.2       | -1.3      | -1.3      | -1.7      | -1.8      | -1.3         | -1.2      |
| RAG1                                                                          | recombination activating gene 1                                                |         |        | -1.3       | -3.6      | -3.2      | -4.2      | -1.3      | -3.0         | *         |
| RAPGEF2                                                                       | Rap guanine nucleotide exchange factor (GEF) 2                                 |         |        | *          | 1.7       | 1.7       | 1.4       | 1.3       | 1.3          | *         |
| RBMS1                                                                         | RNA binding motif, single stranded interacting protein 1                       | ◆       |        | *          | 1.4       | 2.0       | 1.7       | 1.6       | 1.5          | 1.6       |
| RRS1                                                                          | RRS1 ribosome biogenesis regulator homolog (S. cerevisiae)                     |         |        | *          | -1.9      | -2.7      | -1.9      | -1.6      | -1.2         | -1.3      |
| SCARB1                                                                        | scavenger receptor class B, member 1                                           | ◆       |        | *          | -1.7      | -2.2      | -1.2      | -1.5      | -1.2         | -1.3      |
| SMN1                                                                          | survival of motor neuron 1, telomeric                                          |         |        | *          | -1.6      | -1.4      | -1.8      | -1.4      | -1.3         | *         |
| SMPD1                                                                         | sphingomyelin phosphodiesterase 1, acid lysosomal (acid sphingomyelinase)      |         |        | *          | 2.3       | 2.8       | 1.3       | 1.3       | 1.2          | 1.2       |
| SRM                                                                           | spermidine synthase                                                            | ◆       |        | *          | -1.8      | -3.3      | -1.7      | -1.4      | -1.4         | *         |
| TAGLN2                                                                        | transgelin 2                                                                   | ◆       |        | *          | -1.4      | -2.0      | -1.3      | -1.2      | -1.2         | *         |
| TARBP1                                                                        | Tar (HIV-1) RNA binding protein 1                                              |         |        | *          | -1.6      | -1.6      | -1.8      | -1.6      | -1.3         | *         |
| TFPI                                                                          | tissue factor pathway inhibitor (lipoprotein-associated coagulation inhibitor) |         |        | *          | 3.1       | 5.4       | 1.9       | 2.0       | 1.8          | 1.7       |
| TMEM123                                                                       | transmembrane protein 123                                                      |         |        | *          | 1.3       | 1.3       | 1.3       | 1.4       | 1.2          | 1.2       |
| TRAF3IP2                                                                      | TRAF3 interacting protein 2                                                    | ◆       |        | *          | 1.6       | 2.1       | 1.8       | 1.5       | 1.4          | 1.3       |
| TRAM2                                                                         | translocation associated membrane protein 2                                    |         |        | *          | 1.5       | 1.5       | 1.7       | 1.3       | 1.4          | *         |
| TRIP13                                                                        | thyroid hormone receptor interactor 13                                         |         |        | *          | -1.5      | -1.4      | -1.6      | -1.2      | -1.3         | *         |
| TSC22D3                                                                       | TSC22 domain family, member 3                                                  | ◆       |        | *          | 33.1      | 74.0      | 20.4      | 7.4       | 14.3         | 5.0       |
| TUBA1                                                                         | tubulin, alpha 1                                                               |         |        | 1.3        | 10.4      | 8.9       | 3.0       | 1.5       | 2.0          | 1.3       |
| TXNIP                                                                         | thioredoxin interacting protein                                                | ◆       |        | 2.6        | 2.8       | 3.4       | 3.7       | 1.4       | 2.0          | 1.2       |
| UBE2M                                                                         | ubiquitin-conjugating enzyme E2M (UBC12 homolog, yeast)                        |         |        | *          | -1.4      | -1.3      | -1.3      | -1.4      | -1.3         | -1.3      |
| UBE2S                                                                         | ubiquitin-conjugating enzyme E2S                                               | ◆       | •      | 1.5        | -1.6      | -1.6      | -1.3      | -1.6      | -1.3         | *         |
| VCL                                                                           | vinculin                                                                       | ◆       | •      | -1.3       | 1.8       | 1.6       | 1.9       | 1.3       | 1.5          | *         |
| WFS1                                                                          | Wolfram syndrome 1 (wolframin)                                                 |         |        | *          | 2.6       | 2.2       | 2.8       | 1.5       | 1.8          | 1.3       |
| XPOT                                                                          | exportin, tRNA (nuclear export receptor for tRNAs)                             |         |        | -1.3       | -1.4      | -1.8      | -1.5      | -1.4      | -1.2         | *         |
| YAF2                                                                          | YY1 associated factor 2                                                        | ◆       |        | *          | 1.8       | 2.4       | 1.6       | 1.7       | 1.3          | 1.6       |
| ZFP36L2                                                                       | zinc finger protein 36, C3H type-like 2                                        |         |        | 3.3        | 3.0       | 2.5       | 2.5       | 3.3       | 10.1         | 1.9       |
| ZNF259                                                                        | zinc finger protein 259                                                        |         |        | *          | -1.4      | -1.4      | -1.8      | -1.3      | -1.2         | *         |
