# Supplementary material for: Gene expression profiling of leukemic cells and primary thymocytes predicts a signature for apoptotic sensitivity to glucocorticoids
Source: Springer Nature journal article supplement (doi:10.1186/1475-2867-7-18), 2007-11-28
Supplement: Additional file 2 [file 1475-2867-7-18-s2.pdf]

| Additional file 2: Gene expression signature for GC-sensitivity among multiple leukemias. |                                                                                    |        |            |           |           |           |           |           |           |           |
|-------------------------------------------------------------------------------------------|------------------------------------------------------------------------------------|--------|------------|-----------|-----------|-----------|-----------|-----------|-----------|-----------|
| Page 1                                                                                    |                                                                                    |        |            |           |           |           |           |           |           |           |
| GC-response                                                                               |                                                                                    |        | Sensitive  | Sensitive | Sensitive | Sensitive | Sensitive | Sensitive | Sensitive | Resistant |
| Mouse vs. Patient-derived cell line                                                       |                                                                                    |        | Mouse      | Pediatric | Pediatric | Pediatric | Adult     | Pediatric | Pediatric | Pediatric |
| Cell lineage                                                                              |                                                                                    |        | T-cell     | T-cell    | T-cell    | T-cell    | B-cell    | B-cell    | Myeloid   | T-cell    |
| Sub-type of leukemia or primary thymocyte                                                 |                                                                                    |        | Thymocyte  | ALL       | ALL       | ALL       | ALL       | ALL       | AML       | ALL       |
| Name                                                                                      | Description                                                                        | Opp. R | C57/BL6 Dx | C7-14 Dx  | C7-14 Z   | C1-6 Dx   | RS4 Dx    | SUP Dx    | Kas Dx    | C1-15 Dx  |
| AARS                                                                                      | alanyl-tRNA synthetase                                                             |        | -1.5       | -1.3      | -1.3      | -1.2      | -2.0      | -1.9      | -1.5      | *         |
| ABI1                                                                                      | abl-interactor 1                                                                   |        | *          | 1.3       | 1.8       | 1.3       | 1.4       | 1.7       | 2.8       | 1.4       |
| ACLY                                                                                      | ATP citrate lyase                                                                  |        | *          | -1.3      | -1.8      | -1.2      | -1.4      | -1.7      | -1.3      | *         |
| ADAM9                                                                                     | ADAM metalloproteinase domain 9 (meltrin gamma)                                    |        | *          | 1.3       | 1.8       | 1.3       | 2.4       | 1.6       | 2.1       | 1.3       |
| AK2                                                                                       | adenylate kinase 2                                                                 |        | *          | -1.4      | -1.7      | -1.6      | -1.4      | -2.2      | -3.3      | *         |
| AKAP1                                                                                     | A kinase anchor protein 1                                                          |        | -1.2       | -1.6      | -2.5      | -1.9      | -1.8      | -2.4      | -2.2      | *         |
| AP3S1                                                                                     | adaptor-related protein complex 3, sigma 1 subunit                                 |        | *          | 1.6       | 2.0       | 1.9       | 1.4       | 2.4       | 2.1       | *         |
| APG12L                                                                                    | ATG12 autophagy related 12 homolog (S. cerevisiae)                                 | •      | -1.4       | 1.6       | 2.0       | 1.9       | 1.3       | 1.9       | 2.5       | *         |
| APPBP1                                                                                    | amyloid beta precursor protein binding protein 1                                   |        | *          | -1.2      | -1.6      | -1.5      | -1.2      | -1.3      | -1.2      | *         |
| ATF5                                                                                      | activating transcription factor 5                                                  |        | *          | -1.5      | -1.9      | -1.3      | -1.6      | -2.0      | -1.4      | *         |
| ATIC                                                                                      | 5-aminoimidazole-4-carboxamide ribonucleotide formyltransferase/IMP cyclohydrolase |        | *          | -1.4      | -1.9      | -2.0      | -2.1      | -3.2      | -1.3      | *         |
| ATP6V0D1                                                                                  | ATPase, H+ transporting, lysosomal 38kDa, V0 subunit D1                            |        | *          | 1.3       | 1.3       | 1.3       | 1.4       | 1.2       | 1.7       | *         |
| BCL2L11                                                                                   | BCL2-like 11 (apoptosis facilitator)                                               |        | 1.8        | 3.1       | 14.5      | 5.9       | 1.2       | 3.1       | 5.1       | *         |
| BDH                                                                                       | 3-hydroxybutyrate dehydrogenase, type 1                                            |        | *          | -1.3      | -1.5      | -1.5      | -1.3      | -1.7      | -1.6      | *         |
| BIRC2                                                                                     | baculoviral IAP repeat-containing 2                                                |        | *          | 1.9       | 1.7       | 1.5       | 1.4       | 1.9       | 1.6       | *         |
| BTG1                                                                                      | B-cell translocation gene 1, anti-proliferative                                    |        | *          | 9.3       | 9.1       | 4.4       | 1.2       | 3.9       | 8.8       | 1.9       |
| BYSL                                                                                      | bystin-like                                                                        |        | *          | -2.2      | -1.8      | -2.3      | -6.2      | -8.4      | -4.0      | *         |
| CAPN7                                                                                     | calpain 7                                                                          | •      | -1.7       | 1.4       | 1.4       | 1.3       | 1.4       | 1.5       | 1.2       | *         |
| CCT5                                                                                      | chaperonin containing TCP1, subunit 5 (epsilon)                                    | •      | 1.8        | -1.6      | -1.8      | -1.7      | -1.3      | -1.5      | -1.5      | *         |
| CD53                                                                                      | CD53 antigen                                                                       |        | *          | 3.1       | 3.4       | 3.2       | 1.4       | 3.1       | 7.2       | 1.4       |
| CD99                                                                                      | CD99 antigen                                                                       |        | *          | 1.2       | 1.5       | 1.8       | 1.7       | 3.4       | 2.6       | *         |
| CDC6                                                                                      | CDC6 cell division cycle 6 homolog (S. cerevisiae)                                 |        | -1.2       | -1.3      | -1.2      | -1.5      | -1.7      | -2.9      | -4.7      | -1.3      |
| CDC25A                                                                                    | cell division cycle 25A                                                            |        | *          | -1.4      | -1.2      | -1.4      | -1.6      | -1.4      | -19.4     | *         |
| CEBPZ                                                                                     | CCAAT/enhancer binding protein zeta                                                |        | *          | -1.5      | -1.4      | -1.8      | -1.7      | -1.5      | -2.5      | *         |
| CENTB2                                                                                    | centaurin, beta 2                                                                  |        | *          | 1.3       | 1.8       | 1.3       | 1.5       | 1.5       | 1.3       | *         |
| CHC1                                                                                      | regulator of chromosome condensation 1                                             |        | *          | -1.7      | -2.1      | -1.6      | -1.2      | -1.8      | -1.7      | *         |
| CLK1                                                                                      | CDC-like kinase 1                                                                  | •      | -1.6       | 1.2       | 1.7       | 1.3       | 1.5       | 1.7       | 1.6       | *         |
| CSE1L                                                                                     | CSE1 chromosome segregation 1-like (yeast)                                         |        | *          | -1.3      | -1.5      | -1.4      | -1.6      | -1.4      | -2.5      | *         |
| CTPS                                                                                      | CTP synthase                                                                       | •      | 1.3        | -1.7      | -2.5      | -1.8      | -1.5      | -1.4      | -2.4      | *         |
| CUGBP2                                                                                    | CUG triplet repeat, RNA binding protein 2                                          |        | 1.2        | 2.0       | 2.2       | 1.8       | 5.7       | 2.4       | 1.7       | *         |
| DDIT4                                                                                     | DNA-damage-inducible transcript 4                                                  |        | 2.9        | 4.4       | 3.4       | 2.5       | 5.5       | 4.6       | 22.4      | 1.5       |
| DSCR1                                                                                     | Down syndrome critical region gene 1                                               |        | 1.3        | 5.0       | 8.2       | 4.8       | 1.5       | 7.7       | 7.9       | *         |
| EEF1E1                                                                                    | eukaryotic translation elongation factor 1 epsilon 1                               |        | *          | -1.7      | -2.1      | -2.3      | -1.6      | -3.3      | -2.4      | -1.7      |
| EIF2S1                                                                                    | eukaryotic translation initiation factor 2, subunit 1 alpha, 35kDa                 |        | *          | -1.4      | -1.2      | -1.4      | -1.2      | -1.6      | -1.8      | *         |
| EIF3S9                                                                                    | eukaryotic translation initiation factor 3, subunit 9 eta, 116kDa                  |        | *          | -1.5      | -2.2      | -1.3      | -1.2      | -2.0      | -2.2      | *         |

| Additional file 2: Gene expression signature for GC-sensitivity among multiple leukemias. |                                                                               |        |            |           |           |           |           |           |           |           |
|-------------------------------------------------------------------------------------------|-------------------------------------------------------------------------------|--------|------------|-----------|-----------|-----------|-----------|-----------|-----------|-----------|
| Page 2                                                                                    |                                                                               |        |            |           |           |           |           |           |           |           |
| GC-response                                                                               |                                                                               |        | Sensitive  | Sensitive | Sensitive | Sensitive | Sensitive | Sensitive | Sensitive | Resistant |
| Mouse vs. Patient-derived cell line                                                       |                                                                               |        | Mouse      | Pediatric | Pediatric | Pediatric | Adult     | Pediatric | Pediatric | Pediatric |
| Cell lineage                                                                              |                                                                               |        | T-cell     | T-cell    | T-cell    | T-cell    | B-cell    | B-cell    | Myeloid   | T-cell    |
| Sub-type of leukemia or primary thymocyte                                                 |                                                                               |        | Thymocyte  | ALL       | ALL       | ALL       | ALL       | ALL       | AML       | ALL       |
| Name                                                                                      | Description                                                                   | Opp. R | C57/BL6 Dx | C7-14 Dx  | C7-14 Z   | C1-6 Dx   | RS4 Dx    | SUP Dx    | Kas Dx    | C1-15 Dx  |
| EXOSC2                                                                                    | exosome component 2                                                           |        | *          | -1.7      | -1.7      | -1.2      | -1.2      | -2.4      | -2.6      | *         |
| FADS1                                                                                     | fatty acid desaturase 1                                                       |        | *          | -1.5      | -4.1      | -1.9      | -1.5      | -1.5      | -1.8      | -1.3      |
| FH                                                                                        | fumarate hydratase                                                            |        | *          | -1.2      | -1.4      | -1.2      | -1.4      | -2.1      | -2.6      | -1.2      |
| FKBP5                                                                                     | FK506 binding protein 5                                                       |        | 1.7        | 6.6       | 11.2      | 4.4       | 7.0       | 21.4      | 13.7      | 2.8       |
| FNBP1L                                                                                    | formin binding protein 1-like                                                 |        | *          | 1.9       | 1.5       | 1.8       | 1.4       | 3.0       | 3.5       | 1.3       |
| FOXO3A                                                                                    | forkhead box O3A                                                              |        | *          | 1.3       | 1.4       | 1.2       | 1.7       | 2.7       | 2.3       | -1.5      |
| GLUL                                                                                      | glutamate-ammonia ligase (glutamine synthetase)                               |        | 1.2        | 1.9       | 2.2       | 3.4       | 2.3       | 2.5       | 1.8       | *         |
| GM2A                                                                                      | GM2 ganglioside activator                                                     |        | *          | 1.3       | 2.1       | 1.5       | 1.4       | 1.5       | 1.6       | *         |
| GMPS                                                                                      | guanine monophosphate synthetase                                              |        | *          | -1.3      | -1.3      | -1.4      | -1.4      | -1.4      | -2.1      | *         |
| GSPT1                                                                                     | G1 to S phase transition 1                                                    |        | -1.2       | -1.5      | -1.4      | -1.8      | -1.6      | -1.2      | -1.4      | *         |
| GTF3A                                                                                     | general transcription factor IIIA                                             | •      | 1.5        | -1.3      | -1.6      | -1.5      | -1.7      | -1.4      | -2.0      | *         |
| HBP1                                                                                      | HMG-box transcription factor 1                                                |        | *          | 1.5       | 1.8       | 1.6       | 1.6       | 1.4       | 1.5       | *         |
| HNRPAB                                                                                    | heterogeneous nuclear ribonucleoprotein A/B                                   |        | *          | -1.5      | -1.8      | -1.4      | -1.4      | -1.6      | -1.8      | *         |
| HRMT1L2                                                                                   | HMT1 hnRNP methyltransferase-like 2 (S. cerevisiae)                           | •      | 1.6        | -1.5      | -2.2      | -1.7      | -1.2      | -2.6      | -2.6      | *         |
| HS6ST1                                                                                    | heparan sulfate 6-O-sulfotransferase 1                                        |        | *          | 1.3       | 2.1       | 2.2       | 1.3       | 1.8       | 1.5       | *         |
| IARS                                                                                      | isoleucine-tRNA synthetase                                                    |        | -1.3       | -1.6      | -1.7      | -1.7      | -1.4      | -2.2      | -3.8      | *         |
| IDH3A                                                                                     | isocitrate dehydrogenase 3 (NAD+) alpha                                       |        | *          | -1.5      | -1.3      | -1.5      | -1.6      | -1.7      | -2.4      | *         |
| IFNGR1                                                                                    | interferon gamma receptor 1                                                   |        | *          | 1.7       | 2.0       | 1.2       | 5.7       | 3.3       | 2.6       | *         |
| INPP1                                                                                     | inositol polyphosphate-1-phosphatase                                          |        | *          | 3.5       | 4.5       | 17.6      | 1.4       | 2.7       | 13.6      | *         |
| JAK1                                                                                      | Janus kinase 1 (a protein tyrosine kinase)                                    |        | 1.4        | 2.2       | 4.8       | 2.6       | 1.9       | 1.8       | 3.4       | 1.9       |
| KIAA0133                                                                                  | KIAA0133                                                                      |        | *          | -1.5      | -1.4      | -1.3      | -1.5      | -1.4      | -1.6      | *         |
| LRP8                                                                                      | low density lipoprotein receptor-related protein 8, apolipoprotein e receptor |        | *          | -2.2      | -3.6      | -2.8      | -1.6      | -2.1      | -2.6      | -1.2      |
| LSM7                                                                                      | LSM7 homolog, U6 small nuclear RNA associated (S. cerevisiae)                 |        | *          | -1.2      | -1.4      | -1.4      | -1.5      | -1.5      | -1.4      | *         |
| M11S1                                                                                     | GPI-anchored membrane protein 1                                               |        | *          | -1.2      | -1.3      | -1.3      | -2.0      | -1.3      | -1.5      | *         |
| MAP2K1                                                                                    | mitogen-activated protein kinase kinase 1                                     |        | *          | 1.5       | 1.7       | 1.7       | 1.5       | 1.9       | 2.1       | 1.4       |
| MARS                                                                                      | methionine-tRNA synthetase                                                    |        | *          | -1.5      | -1.6      | -1.5      | -1.5      | -2.2      | -2.2      | *         |
| MEP50                                                                                     | WD repeat domain 77                                                           |        | *          | -1.7      | -1.4      | -1.8      | -1.8      | -1.5      | -1.4      | *         |
| MGC5508                                                                                   | transmembrane protein 109                                                     |        | *          | -1.4      | -1.5      | -1.6      | -1.4      | -1.7      | -1.5      | *         |
| MGC17330                                                                                  | HGFL gene                                                                     |        | *          | 7.3       | 6.8       | 5.5       | 34.8      | 7.3       | 12.3      | *         |
| MSN                                                                                       | moesin                                                                        |        | *          | 1.2       | 1.3       | 1.2       | 1.4       | 1.2       | 1.7       | 1.2       |
| MT1H                                                                                      | metallothionein 1H                                                            |        | *          | 1.3       | 1.5       | 2.1       | 1.4       | 3.0       | 1.3       | *         |
| MT1X                                                                                      | metallothionein 1X                                                            |        | *          | 1.4       | 2.1       | 2.2       | 1.6       | 1.8       | 1.7       | *         |
| NCK1                                                                                      | NCK adaptor protein 1                                                         | •      | -1.6       | 1.4       | 2.3       | 2.3       | 1.7       | 1.5       | 1.5       | 1.4       |
| NCL                                                                                       | nucleolin                                                                     |        | *          | -1.3      | -1.5      | -1.2      | -1.6      | -1.9      | -1.2      | *         |
| NDRG1                                                                                     | N-myc downstream regulated gene 1                                             |        | *          | 1.6       | 1.7       | 1.4       | 9.2       | 3.1       | 2.3       | *         |

| Additional file 2: Gene expression signature for GC-sensitivity among multiple leukemias. |                                                                                                   |        |            |           |           |           |           |           |           |           |
|-------------------------------------------------------------------------------------------|---------------------------------------------------------------------------------------------------|--------|------------|-----------|-----------|-----------|-----------|-----------|-----------|-----------|
| Page 3                                                                                    |                                                                                                   |        |            |           |           |           |           |           |           |           |
| GC-response                                                                               |                                                                                                   |        | Sensitive  | Sensitive | Sensitive | Sensitive | Sensitive | Sensitive | Sensitive | Resistant |
| Mouse vs. Patient-derived cell line                                                       |                                                                                                   |        | Mouse      | Pediatric | Pediatric | Pediatric | Adult     | Pediatric | Pediatric | Pediatric |
| Cell lineage                                                                              |                                                                                                   |        | T-cell     | T-cell    | T-cell    | T-cell    | B-cell    | B-cell    | Myeloid   | T-cell    |
| Sub-type of leukemia or primary thymocyte                                                 |                                                                                                   |        | Thymocyte  | ALL       | ALL       | ALL       | ALL       | ALL       | AML       | ALL       |
| Name                                                                                      | Description                                                                                       | Opp. R | C57/BL6 Dx | C7-14 Dx  | C7-14 Z   | C1-6 Dx   | RS4 Dx    | SUP Dx    | Kas Dx    | C1-15 Dx  |
| NFKBIA                                                                                    | nuclear factor of kappa light polypeptide gene enhancer in B-cells inhibitor, alpha               |        | 1.5        | 3.0       | 3.4       | 2.8       | 1.9       | 2.5       | 5.5       | 1.3       |
| NOLA2                                                                                     | nucleolar protein family A, member 2 (H/ACA small nucleolar RNPs)                                 |        | *          | -1.3      | -1.9      | -1.6      | -1.5      | -1.8      | -2.0      | *         |
| NUP62                                                                                     | nucleoporin 62kDa                                                                                 |        | *          | -1.4      | -1.4      | -1.3      | -1.4      | -1.4      | -2.6      | *         |
| NUP98                                                                                     | nucleoporin 98kDa                                                                                 |        | *          | -1.2      | -1.2      | -1.3      | -1.7      | -2.0      | -1.4      | *         |
| ODC1                                                                                      | ornithine decarboxylase 1                                                                         |        | *          | -2.1      | -2.7      | -2.1      | -1.2      | -1.5      | -6.6      | *         |
| OGT                                                                                       | O-linked N-acetylglucosamine (GlcNAc) transferase                                                 | •      | -1.5       | 1.3       | 1.7       | 2.0       | 2.0       | 1.3       | 2.1       | *         |
| PA2G4                                                                                     | proliferation-associated 2G4, 38kDa                                                               | •      | 1.2        | -1.7      | -1.9      | -1.7      | -1.3      | -2.5      | -3.5      | *         |
| PAI-RBP1                                                                                  | SERPINE1 mRNA binding protein 1                                                                   |        | *          | -1.6      | -1.5      | -1.6      | -1.5      | -1.9      | -2.2      | 1.3       |
| PARD3                                                                                     | par-3 partitioning defective 3 homolog (C. elegans)                                               |        | *          | 1.6       | 1.7       | 1.4       | 2.5       | 1.5       | 3.0       | *         |
| PFAS                                                                                      | phosphoribosylformylglycinamide synthase (FGAR amidotransferase)                                  |        | *          | -1.4      | -2.1      | -1.2      | -2.4      | -2.7      | -2.3      | *         |
| PICALM                                                                                    | phosphatidylinositol binding clathrin assembly protein                                            |        | *          | 1.7       | 1.7       | 1.5       | 2.1       | 2.0       | 2.1       | *         |
| POLE2                                                                                     | polymerase (DNA directed), epsilon 2 (p59 subunit)                                                |        | *          | -1.2      | -1.3      | -1.7      | -1.8      | -2.1      | -2.0      | *         |
| POLR2D                                                                                    | polymerase (RNA) II (DNA directed) polypeptide D                                                  | •      | 1.3        | -1.3      | -1.3      | -1.8      | -1.2      | -1.3      | -2.0      | *         |
| POLR2I                                                                                    | polymerase (RNA) II (DNA directed) polypeptide I, 14.5kDa                                         |        | *          | -1.4      | -1.9      | -1.5      | -1.6      | -1.8      | -1.7      | *         |
| PRG1                                                                                      | proteoglycan 1, secretory granule                                                                 |        | 1.6        | 2.6       | 4.5       | 3.2       | 2.7       | 1.5       | 2.7       | 1.6       |
| PSEN1                                                                                     | presenilin 1 (Alzheimer disease 3)                                                                |        | *          | 1.7       | 1.8       | 1.5       | 1.3       | 1.5       | 2.0       | *         |
| RAD23A                                                                                    | RAD23 homolog A (S. cerevisiae)                                                                   |        | *          | -1.4      | -1.6      | -1.3      | -1.2      | -1.4      | -1.4      | *         |
| RANBP1                                                                                    | RAN binding protein 1                                                                             | •      | 1.4        | -1.3      | -1.8      | -1.5      | -1.9      | -1.6      | -2.8      | *         |
| RAPGEF2                                                                                   | Rap guanine nucleotide exchange factor (GEF) 2                                                    |        | *          | 1.7       | 1.7       | 1.4       | 1.8       | 2.0       | 4.2       | *         |
| RASA1                                                                                     | RAS p21 protein activator (GTPase activating protein) 1                                           |        | *          | 1.9       | 2.2       | 2.1       | 1.9       | 2.3       | 3.5       | *         |
| RBMS1                                                                                     | RNA binding motif, single stranded interacting protein 1                                          |        | *          | 1.4       | 2.0       | 1.7       | 3.0       | 4.3       | 2.3       | 1.6       |
| RDH11                                                                                     | retinol dehydrogenase 11 (all-trans and 9-cis)                                                    |        | *          | -1.3      | -1.6      | -1.4      | -1.3      | -1.8      | -1.6      | *         |
| SAP30                                                                                     | sin3-associated polypeptide, 30kDa                                                                |        | 1.6        | 2.2       | 1.8       | 1.7       | 1.7       | 2.3       | 3.8       | *         |
| SCARB1                                                                                    | scavenger receptor class B, member 1                                                              |        | *          | -1.7      | -2.2      | -1.2      | -1.4      | -4.9      | -33.3     | -1.3      |
| SFRS2                                                                                     | splicing factor, arginine/serine-rich 2                                                           |        | *          | -1.2      | -1.2      | -1.2      | -1.3      | -1.4      | -1.5      | 1.2       |
| SIVA                                                                                      | CD27-binding (Siva) protein                                                                       |        | *          | -1.4      | -1.3      | -1.3      | -1.6      | -1.7      | -2.9      | *         |
| SLA                                                                                       | Src-like-adaptor                                                                                  | •      | -1.5       | 2.8       | 3.1       | 3.1       | 2.1       | 4.4       | 10.8      | *         |
| SLC7A1                                                                                    | solute carrier family 7 (cationic amino acid transporter, y+ system), member 1                    |        | *          | -1.7      | -2.0      | -2.1      | -2.4      | -2.7      | -2.3      | 1.3       |
| SLC16A1                                                                                   | solute carrier family 16 (monocarboxylic acid transporters), member 1                             |        | -1.5       | -1.3      | -1.3      | -1.5      | -1.2      | -2.8      | -3.9      | *         |
| SLC29A1                                                                                   | solute carrier family 29 (nucleoside transporters), member 1                                      |        | *          | -1.7      | -2.1      | -1.5      | -1.3      | -2.6      | -2.0      | *         |
| SMARCA4                                                                                   | SWI/SNF related, matrix associated, actin dependent regulator of chromatin, subfamily a, member 4 |        | -1.3       | -1.3      | -1.2      | -1.6      | -1.9      | -1.6      | -1.4      | *         |
| SORD                                                                                      | sorbitol dehydrogenase                                                                            |        | *          | -1.4      | -1.8      | -1.5      | -1.3      | -1.6      | -2.9      | *         |
| SRD5A1                                                                                    | steroid-5-alpha-reductase, alpha polypeptide 1                                                    |        | *          | 2.7       | 4.6       | 3.0       | 2.0       | 1.2       | 4.9       | 1.2       |
| SSBP1                                                                                     | single-stranded DNA binding protein 1                                                             |        | *          | -1.3      | -1.2      | -1.4      | -1.3      | -1.8      | -1.4      | *         |
| STAT2                                                                                     | signal transducer and activator of transcription 2, 113kDa                                        |        | *          | 1.4       | 1.3       | 1.4       | 1.3       | 1.2       | 1.5       | *         |

| <b>Additional file 2: Gene expression signature for GC-sensitivity among multiple leukemias.</b> |                                                                                |               |                   |                  |                  |                  |                  |                  |                  |                  |
|--------------------------------------------------------------------------------------------------|--------------------------------------------------------------------------------|---------------|-------------------|------------------|------------------|------------------|------------------|------------------|------------------|------------------|
| <b>Page 4</b>                                                                                    |                                                                                |               |                   |                  |                  |                  |                  |                  |                  |                  |
| <b>GC-response</b>                                                                               |                                                                                |               | <b>Sensitive</b>  | <b>Sensitive</b> | <b>Sensitive</b> | <b>Sensitive</b> | <b>Sensitive</b> | <b>Sensitive</b> | <b>Sensitive</b> | <b>Resistant</b> |
| <b>Mouse vs. Patient-derived cell line</b>                                                       |                                                                                |               | <b>Mouse</b>      | <b>Pediatric</b> | <b>Pediatric</b> | <b>Pediatric</b> | <b>Adult</b>     | <b>Pediatric</b> | <b>Pediatric</b> | <b>Pediatric</b> |
| <b>Cell lineage</b>                                                                              |                                                                                |               | <b>T-cell</b>     | <b>T-cell</b>    | <b>T-cell</b>    | <b>T-cell</b>    | <b>B-cell</b>    | <b>B-cell</b>    | <b>Myeloid</b>   | <b>T-cell</b>    |
| <b>Sub-type of leukemia or primary thymocyte</b>                                                 |                                                                                |               | <b>Thymocyte</b>  | <b>ALL</b>       | <b>ALL</b>       | <b>ALL</b>       | <b>ALL</b>       | <b>ALL</b>       | <b>AML</b>       | <b>ALL</b>       |
| <b>Name</b>                                                                                      | <b>Description</b>                                                             | <b>Opp. R</b> | <b>C57/BL6 Dx</b> | <b>C7-14 Dx</b>  | <b>C7-14 Z</b>   | <b>C1-6 Dx</b>   | <b>RS4 Dx</b>    | <b>SUP Dx</b>    | <b>Kas Dx</b>    | <b>C1-15 Dx</b>  |
| STIP1                                                                                            | stress-induced-phosphoprotein 1 (Hsp70/Hsp90-organizing protein)               | •             | 1.5               | -1.8             | -1.4             | -1.6             | -1.6             | -1.4             | -1.3             | *                |
| SYNCRIP                                                                                          | synaptotagmin binding, cytoplasmic RNA interacting protein                     |               | -1.3              | -1.3             | -1.5             | -1.4             | -1.7             | -1.6             | -1.9             | *                |
| TCP1                                                                                             | t-complex 1                                                                    |               | *                 | -1.4             | -1.5             | -1.7             | -1.3             | -1.5             | -1.6             | *                |
| TFAM                                                                                             | transcription factor A, mitochondrial                                          |               | *                 | -1.3             | -1.5             | -1.8             | -1.4             | -1.8             | -2.0             | *                |
| TFPI                                                                                             | tissue factor pathway inhibitor (lipoprotein-associated coagulation inhibitor) |               | *                 | 3.1              | 5.4              | 1.9              | 4.9              | 9.6              | 24.6             | 1.7              |
| TOMM40                                                                                           | translocase of outer mitochondrial membrane 40 homolog (yeast)                 |               | *                 | -1.5             | -2.0             | -1.3             | -1.2             | -1.4             | -1.6             | *                |
| TRAP1                                                                                            | TNF receptor-associated protein 1                                              |               | *                 | -1.6             | -1.8             | -1.6             | -1.3             | -1.9             | -1.8             | *                |
| TSC22D3                                                                                          | TSC22 domain family, member 3                                                  |               | *                 | 33.1             | 74.0             | 20.4             | 5.2              | 17.5             | 20.0             | 5.0              |
| TSFM                                                                                             | Ts translation elongation factor, mitochondrial                                |               | *                 | -1.5             | -1.4             | -1.6             | -1.2             | -2.5             | -1.6             | *                |
| TSNAX                                                                                            | translin-associated factor X                                                   |               | *                 | 2.1              | 2.6              | 2.2              | 1.2              | 1.9              | 2.0              | *                |
| TXNIP                                                                                            | thioredoxin interacting protein                                                |               | 2.6               | 2.8              | 3.4              | 3.7              | 10.0             | 7.7              | 2.1              | 1.2              |
| UBTF                                                                                             | upstream binding transcription factor, RNA polymerase I                        |               | *                 | -1.3             | -1.3             | -1.3             | -1.2             | -1.3             | -1.4             | *                |
| VAR2                                                                                             | valyl-tRNA synthetase                                                          |               | *                 | -1.5             | -1.3             | -1.3             | -1.3             | -2.1             | -2.1             | *                |
| YAF2                                                                                             | YY1 associated factor 2                                                        |               | *                 | 1.8              | 2.4              | 1.6              | 1.7              | 1.9              | 5.8              | 1.6              |
| YARS                                                                                             | tyrosyl-tRNA synthetase                                                        |               | *                 | -1.6             | -1.5             | -1.3             | -1.9             | -2.6             | -2.4             | *                |
| ZHX3                                                                                             | zinc fingers and homeoboxes 3                                                  |               | *                 | 1.3              | 1.4              | 1.3              | 2.0              | 2.0              | 1.4              | 1.3              |
| ZNF259                                                                                           | zinc finger protein 259                                                        |               | *                 | -1.4             | -1.5             | -1.8             | -1.2             | -1.3             | -1.6             | *                |
