# Supplementary material for: Gene expression profiling of leukemic cells and primary thymocytes predicts a signature for apoptotic sensitivity to glucocorticoids
Source: Springer Nature journal article supplement (doi:10.1186/1475-2867-7-18), 2007-11-28
Supplement: Additional file 3 [file 1475-2867-7-18-s3.pdf]

| <b>Additional file 3: GC-regulated genes in sensitive and resensitized human leukemias.</b> |                                                         |                    |                    |
|---------------------------------------------------------------------------------------------|---------------------------------------------------------|--------------------|--------------------|
| <b>(83 Induced, 108 Repressed = 191 Total Genes)</b>                                        |                                                         |                    |                    |
| <b>Page 1</b>                                                                               |                                                         |                    |                    |
| <b>Induced Genes</b>                                                                        |                                                         | <b>Add. file 1</b> | <b>Add. file 2</b> |
| ABI1                                                                                        | abl-interactor 1                                        |                    | +                  |
| ADAM9                                                                                       | ADAM metalloproteinase domain 9 (meltrin gamma)         |                    | +                  |
| AP3S1                                                                                       | adaptor-related protein complex 3, sigma 1 subunit      |                    | +                  |
| APG12L                                                                                      | ATG12 autophagy related 12 homolog (S. cerevisiae)      |                    | +                  |
| ARHGEF7                                                                                     | Rho guanine nucleotide exchange factor (GEF) 7          | +                  |                    |
| ATP6V0D1                                                                                    | ATPase, H+ transporting, lysosomal 38kDa, V0 subunit D1 |                    | +                  |
| BCL2L11                                                                                     | BCL2-like 11 (apoptosis facilitator)                    | +                  | +                  |
| BIRC2                                                                                       | baculoviral IAP repeat-containing 2                     |                    | +                  |
| BTG1                                                                                        | B-cell translocation gene 1, anti-proliferative         | +                  | +                  |
| BTG2                                                                                        | BTG family, member 2                                    | +                  | +                  |
| CAPN7                                                                                       | calpain 7                                               |                    | +                  |
| CCNG2                                                                                       | cyclin G2                                               | +                  |                    |
| CD53                                                                                        | CD53 antigen                                            | +                  | +                  |
| CD99                                                                                        | CD99 antigen                                            |                    | +                  |
| CENTB2                                                                                      | centaurin, beta 2                                       |                    | +                  |
| CHP                                                                                         | calcium binding protein P22                             | +                  |                    |
| CLK1                                                                                        | CDC-like kinase 1                                       |                    | +                  |
| CUGBP2                                                                                      | CUG triplet repeat, RNA binding protein 2               |                    | +                  |
| CXCR4                                                                                       | chemokine (C-X-C motif) receptor 4                      | +                  |                    |
| DDIT4                                                                                       | DNA-damage-inducible transcript 4                       | +                  | +                  |
| DSCR1                                                                                       | Down syndrome critical region gene 1                    | +                  | +                  |
| FBN1                                                                                        | fibrillin 1                                             | +                  |                    |
| FGFR1                                                                                       | fibroblast growth factor receptor 1                     | +                  |                    |
| FKBP5                                                                                       | FK506 binding protein 5                                 | +                  | +                  |
| FNBP1L                                                                                      | formin binding protein 1-like                           |                    | +                  |
| FOXO3A                                                                                      | forkhead box O3A                                        |                    | +                  |
| GLB1                                                                                        | galactosidase, beta 1                                   | +                  |                    |
| GLRX                                                                                        | glutaredoxin (thioltransferase)                         | +                  |                    |
| GLUL                                                                                        | glutamate-ammonia ligase (glutamine synthetase)         |                    | +                  |
| GM2A                                                                                        | GM2 ganglioside activator                               |                    | +                  |
| GRAP2                                                                                       | GRB2-related adaptor protein 2                          | +                  |                    |
| GSK3B                                                                                       | glycogen synthase kinase 3 beta                         | +                  |                    |
| HBP1                                                                                        | HMG-box transcription factor 1                          |                    | +                  |
| HS6ST1                                                                                      | heparan sulfate 6-O-sulfotransferase 1                  |                    | +                  |
| IDS                                                                                         | iduronate 2-sulfatase (Hunter syndrome)                 | +                  |                    |
| IFNGR1                                                                                      | interferon gamma receptor 1                             |                    | +                  |
| IL7R                                                                                        | interleukin 7 receptor                                  | +                  |                    |
| IL10RB                                                                                      | interleukin 10 receptor, beta                           | +                  |                    |
| INPP1                                                                                       | inositol polyphosphate-1-phosphatase                    |                    | +                  |
| IQGAP2                                                                                      | IQ motif containing GTPase activating protein 2         | +                  |                    |
| ITGA6                                                                                       | integrin, alpha 6                                       | +                  |                    |
| JAK1                                                                                        | Janus kinase 1 (a protein tyrosine kinase)              |                    | +                  |
| MAP2K1                                                                                      | mitogen-activated protein kinase kinase 1               |                    | +                  |
| MGC17330                                                                                    | HGFL gene                                               |                    | +                  |
| MSN                                                                                         | moesin                                                  |                    | +                  |
| MT1A                                                                                        | metallothionein 1A (functional)                         | +                  |                    |
| MT1B                                                                                        | metallothionein 1B (functional)                         | +                  |                    |
| MT1H                                                                                        | metallothionein 1H                                      |                    | +                  |

| <b>Additional file 3: GC-regulated genes in sensitive and resensitized human leukemias.</b> |                                                                                     |                    |                    |
|---------------------------------------------------------------------------------------------|-------------------------------------------------------------------------------------|--------------------|--------------------|
| <b>(83 Induced, 108 Repressed = 191 Total Genes)</b>                                        |                                                                                     |                    |                    |
| <b>Page 2</b>                                                                               |                                                                                     |                    |                    |
| <b>Induced Genes</b>                                                                        |                                                                                     | <b>Add. file 1</b> | <b>Add. file 2</b> |
| MT1X                                                                                        | metallothionein 1X                                                                  | +                  | +                  |
| NCK1                                                                                        | NCK adaptor protein 1                                                               |                    | +                  |
| NDRG1                                                                                       | N-myc downstream regulated gene 1                                                   |                    | +                  |
| NFIL3                                                                                       | nuclear factor, interleukin 3 regulated                                             | +                  |                    |
| NFKBIA                                                                                      | nuclear factor of kappa light polypeptide gene enhancer in B-cells inhibitor, alpha | +                  | +                  |
| NR3C1                                                                                       | nuclear receptor subfamily 3, group C, member 1 (glucocorticoid receptor)           | +                  |                    |
| OGT                                                                                         | O-linked N-acetylglucosamine (GlcNAc) transferase                                   | +                  | +                  |
| PARD3                                                                                       | par-3 partitioning defective 3 homolog (C. elegans)                                 | +                  | +                  |
| PIAS2                                                                                       | protein inhibitor of activated STAT, 2                                              | +                  |                    |
| PICALM                                                                                      | phosphatidylinositol binding clathrin assembly protein                              |                    | +                  |
| PIK3R1                                                                                      | phosphoinositide-3-kinase, regulatory subunit 1 (p85 alpha)                         | +                  |                    |
| PPP2R5C                                                                                     | protein phosphatase 2, regulatory subunit B (B56), gamma isoform                    | +                  |                    |
| PRG1                                                                                        | proteoglycan 1, secretory granule                                                   | +                  | +                  |
| PSEN1                                                                                       | presenilin 1 (Alzheimer disease 3)                                                  |                    | +                  |
| RAPGEF2                                                                                     | Rap guanine nucleotide exchange factor (GEF) 2                                      | +                  | +                  |
| RASA1                                                                                       | RAS p21 protein activator (GTPase activating protein) 1                             |                    | +                  |
| RBMS1                                                                                       | RNA binding motif, single stranded interacting protein 1                            | +                  | +                  |
| SAP30                                                                                       | sin3-associated polypeptide, 30kDa                                                  |                    | +                  |
| SLA                                                                                         | Src-like-adaptor                                                                    |                    | +                  |
| SMPD1                                                                                       | sphingomyelin phosphodiesterase 1, acid lysosomal (acid sphingomyelinase)           | +                  |                    |
| SRD5A1                                                                                      | steroid-5-alpha-reductase, alpha polypeptide 1                                      |                    | +                  |
| STAT2                                                                                       | signal transducer and activator of transcription 2, 113kDa                          |                    | +                  |
| TFPI                                                                                        | tissue factor pathway inhibitor (lipoprotein-associated coagulation inhibitor)      | +                  | +                  |
| TMEM123                                                                                     | transmembrane protein 123                                                           | +                  |                    |
| TRAF3IP2                                                                                    | TRAF3 interacting protein 2                                                         | +                  |                    |
| TRAM2                                                                                       | translocation associated membrane protein 2                                         | +                  |                    |
| TSC22D3                                                                                     | TSC22 domain family, member 3                                                       | +                  | +                  |
| TSNAX                                                                                       | translin-associated factor X                                                        |                    | +                  |
| TUBA1                                                                                       | tubulin, alpha 1                                                                    | +                  |                    |
| TXNIP                                                                                       | thioredoxin interacting protein                                                     | +                  | +                  |
| VCL                                                                                         | vinculin                                                                            | +                  |                    |
| WFS1                                                                                        | Wolfram syndrome 1 (wolframin)                                                      | +                  |                    |
| YAF2                                                                                        | YY1 associated factor 2                                                             | +                  | +                  |
| ZFP36L2                                                                                     | zinc finger protein 36, C3H type-like 2                                             | +                  |                    |
| ZHX3                                                                                        | zinc fingers and homeoboxes 3                                                       |                    | +                  |
| <b>Repressed Genes</b>                                                                      |                                                                                     | <b>Add. file 1</b> | <b>Add. file 2</b> |
| AARS                                                                                        | alanyl-tRNA synthetase                                                              |                    | -                  |
| ABCE1                                                                                       | ATP-binding cassette, sub-family E (OABP), member 1                                 | -                  |                    |
| ACLY                                                                                        | ATP citrate lyase                                                                   |                    | -                  |
| AK2                                                                                         | adenylate kinase 2                                                                  | -                  | -                  |
| AKAP1                                                                                       | A kinase anchor protein 1                                                           |                    | -                  |
| APPBP1                                                                                      | amyloid beta precursor protein binding protein 1                                    |                    | -                  |
| ATF5                                                                                        | activating transcription factor 5                                                   |                    | -                  |
| ATIC                                                                                        | 5-aminoimidazole-4-carboxamide ribonucleotide formyltransferase/IMP cyclohydrolase  |                    | -                  |
| BDH                                                                                         | 3-hydroxybutyrate dehydrogenase, type 1                                             |                    | -                  |
| BYSL                                                                                        | bystin-like                                                                         |                    | -                  |
| CALR                                                                                        | calreticulin                                                                        | -                  |                    |
| CCT5                                                                                        | chaperonin containing TCP1, subunit 5 (epsilon)                                     |                    | -                  |

| <b>Additional file 3: GC-regulated genes in sensitive and resensitized human leukemias.</b> |                                                                               |                    |                    |
|---------------------------------------------------------------------------------------------|-------------------------------------------------------------------------------|--------------------|--------------------|
| <b>(83 Induced, 108 Repressed = 191 Total Genes)</b>                                        |                                                                               |                    |                    |
| <b>Page 3</b>                                                                               |                                                                               |                    |                    |
| <b>Repressed Genes</b>                                                                      |                                                                               | <b>Add. file 1</b> | <b>Add. file 2</b> |
| CDC25A                                                                                      | cell division cycle 25A                                                       |                    | -                  |
| CDC6                                                                                        | CDC6 cell division cycle 6 homolog (S. cerevisiae)                            | -                  | -                  |
| CEBPZ                                                                                       | CCAAT/enhancer binding protein zeta                                           |                    | -                  |
| CHC1                                                                                        | regulator of chromosome condensation 1                                        |                    | -                  |
| CSE1L                                                                                       | CSE1 chromosome segregation 1-like (yeast)                                    |                    | -                  |
| CTPS                                                                                        | CTP synthase                                                                  |                    | -                  |
| DHODH                                                                                       | dihydroorotate dehydrogenase                                                  | -                  |                    |
| DKC1                                                                                        | dyskeratosis congenita 1, dyskerin                                            | -                  |                    |
| EEF1E1                                                                                      | eukaryotic translation elongation factor 1 epsilon 1                          |                    | -                  |
| EIF2S1                                                                                      | eukaryotic translation initiation factor 2, subunit 1 alpha, 35kDa            |                    | -                  |
| EIF3S9                                                                                      | eukaryotic translation initiation factor 3, subunit 9 eta, 116kDa             | -                  | -                  |
| ENO2                                                                                        | enolase 2 (gamma, neuronal)                                                   | -                  |                    |
| EXOSC2                                                                                      | exosome component 2                                                           |                    | -                  |
| FADS1                                                                                       | fatty acid desaturase 1                                                       | -                  | -                  |
| FH                                                                                          | fumarate hydratase                                                            |                    | -                  |
| FKBP4                                                                                       | FK506 binding protein 4, 59kDa                                                | -                  |                    |
| FOXK2                                                                                       | forkhead box K2                                                               | -                  |                    |
| GMPS                                                                                        | guanine monphosphate synthetase                                               |                    | -                  |
| GPR125                                                                                      | G protein-coupled receptor 125                                                | -                  |                    |
| GSPT1                                                                                       | G1 to S phase transition 1                                                    |                    | -                  |
| GTF3A                                                                                       | general transcription factor IIIA                                             |                    | -                  |
| GTPBP6                                                                                      | GTP binding protein 6 (putative)                                              | -                  |                    |
| HDAC1                                                                                       | histone deacetylase 1                                                         | -                  |                    |
| HNRPAB                                                                                      | heterogeneous nuclear ribonucleoprotein A/B                                   |                    | -                  |
| HRAS                                                                                        | v-Ha-ras Harvey rat sarcoma viral oncogene homolog                            | -                  |                    |
| HRMT1L2                                                                                     | HMT1 hnRNP methyltransferase-like 2 (S. cerevisiae)                           |                    | -                  |
| HSPE1                                                                                       | heat shock 10kDa protein 1 (chaperonin 10)                                    | -                  |                    |
| IARS                                                                                        | isoleucine-tRNA synthetase                                                    |                    | -                  |
| ID1                                                                                         | inhibitor of DNA binding 1, dominant negative helix-loop-helix protein        | -                  |                    |
| IDH3A                                                                                       | isocitrate dehydrogenase 3 (NAD+) alpha                                       | -                  | -                  |
| IFRD1                                                                                       | interferon-related developmental regulator 1                                  | -                  |                    |
| IL32                                                                                        | interleukin 32                                                                | -                  |                    |
| ILF3                                                                                        | interleukin enhancer binding factor 3, 90kDa                                  | -                  |                    |
| IMPDH1                                                                                      | IMP (inosine monophosphate) dehydrogenase 1                                   | -                  |                    |
| KIAA0020                                                                                    | KIAA0020                                                                      | -                  |                    |
| KIAA0133                                                                                    | KIAA0133                                                                      |                    | -                  |
| LRP8                                                                                        | low density lipoprotein receptor-related protein 8, apolipoprotein e receptor |                    | -                  |
| LRPPRC                                                                                      | leucine-rich PPR-motif containing                                             | -                  |                    |
| LSM7                                                                                        | LSM7 homolog, U6 small nuclear RNA associated (S. cerevisiae)                 |                    | -                  |
| M11S1                                                                                       | GPI-anchored membrane protein 1                                               |                    | -                  |
| MAP4                                                                                        | microtubule-associated protein 4                                              | -                  |                    |
| MARS                                                                                        | methionine-tRNA synthetase                                                    | -                  | -                  |
| MEP50                                                                                       | WD repeat domain 77                                                           | -                  | -                  |
| MGC5508                                                                                     | transmembrane protein 109                                                     |                    | -                  |
| MLX                                                                                         | MAX-like protein X                                                            | -                  |                    |
| MPI                                                                                         | mannose phosphate isomerase                                                   | -                  |                    |
| MTHFD1                                                                                      | methylenetetrahydrofolate dehydrogenase (NADP+ dependent) 1                   | -                  |                    |
| MYC                                                                                         | v-myc myelocytomatosis viral oncogene homolog (avian)                         | -                  |                    |

| <b>Additional file 3: GC-regulated genes in sensitive and resensitized human leukemias.</b> |                                                                                                   |                    |                    |
|---------------------------------------------------------------------------------------------|---------------------------------------------------------------------------------------------------|--------------------|--------------------|
| <b>(83 Induced, 108 Repressed = 191 Total Genes)</b>                                        |                                                                                                   |                    |                    |
| <b>Page 4</b>                                                                               |                                                                                                   |                    |                    |
| <b>Repressed Genes</b>                                                                      |                                                                                                   | <b>Add. file 1</b> | <b>Add. file 2</b> |
| NCL                                                                                         | nucleolin                                                                                         |                    | -                  |
| NFATC3                                                                                      | nuclear factor of activated T-cells, cytoplasmic, calcineurin-dependent 3                         | -                  |                    |
| NME1                                                                                        | non-metastatic cells 1, protein (NM23A) expressed in                                              | -                  |                    |
| NOLA2                                                                                       | nucleolar protein family A, member 2 (H/ACA small nucleolar RNPs)                                 |                    | -                  |
| NUP62                                                                                       | nucleoporin 62kDa                                                                                 |                    | -                  |
| NUP98                                                                                       | nucleoporin 98kDa                                                                                 |                    | -                  |
| ODC1                                                                                        | ornithine decarboxylase 1                                                                         |                    | -                  |
| PA2G4                                                                                       | proliferation-associated 2G4, 38kDa                                                               | -                  | -                  |
| PAI-RBP1                                                                                    | SERPINE1 mRNA binding protein 1                                                                   |                    | -                  |
| PFAS                                                                                        | phosphoribosylformylglycinamide synthase (FGAR amidotransferase)                                  |                    | -                  |
| POLE2                                                                                       | polymerase (DNA directed), epsilon 2 (p59 subunit)                                                |                    | -                  |
| POLR2D                                                                                      | polymerase (RNA) II (DNA directed) polypeptide D                                                  |                    | -                  |
| POLR2I                                                                                      | polymerase (RNA) II (DNA directed) polypeptide I, 14.5kDa                                         |                    | -                  |
| PTPN2                                                                                       | protein tyrosine phosphatase, non-receptor type 2                                                 | -                  |                    |
| RABGGTB                                                                                     | Rab geranylgeranyltransferase, beta subunit                                                       | -                  |                    |
| RAD23A                                                                                      | RAD23 homolog A ( <i>S. cerevisiae</i> )                                                          |                    | -                  |
| RAG1                                                                                        | recombination activating gene 1                                                                   | -                  |                    |
| RANBP1                                                                                      | RAN binding protein 1                                                                             |                    | -                  |
| RDH11                                                                                       | retinol dehydrogenase 11 (all-trans and 9-cis)                                                    |                    | -                  |
| RRS1                                                                                        | RRS1 ribosome biogenesis regulator homolog ( <i>S. cerevisiae</i> )                               | -                  |                    |
| SCARB1                                                                                      | scavenger receptor class B, member 1                                                              | -                  | -                  |
| SFRS2                                                                                       | splicing factor, arginine/serine-rich 2                                                           |                    | -                  |
| SIVA                                                                                        | CD27-binding (Siva) protein                                                                       |                    | -                  |
| SLC7A1                                                                                      | solute carrier family 7 (cationic amino acid transporter, y+ system), member 1                    |                    | -                  |
| SLC16A1                                                                                     | solute carrier family 16 (monocarboxylic acid transporters), member 1                             |                    | -                  |
| SLC29A1                                                                                     | solute carrier family 29 (nucleoside transporters), member 1                                      |                    | -                  |
| SMARCA4                                                                                     | SWI/SNF related, matrix associated, actin dependent regulator of chromatin, subfamily a, member 4 |                    | -                  |
| SMN1                                                                                        | survival of motor neuron 1, telomeric                                                             | -                  |                    |
| SORD                                                                                        | sorbitol dehydrogenase                                                                            |                    | -                  |
| SRM                                                                                         | spermidine synthase                                                                               | -                  |                    |
| SSBP1                                                                                       | single-stranded DNA binding protein 1                                                             |                    | -                  |
| STIP1                                                                                       | stress-induced-phosphoprotein 1 (Hsp70/Hsp90-organizing protein)                                  |                    | -                  |
| SYNCRIP                                                                                     | synaptotagmin binding, cytoplasmic RNA interacting protein                                        |                    | -                  |
| TAGLN2                                                                                      | transgelin 2                                                                                      | -                  |                    |
| TARBP1                                                                                      | Tar (HIV-1) RNA binding protein 1                                                                 | -                  |                    |
| TCP1                                                                                        | t-complex 1                                                                                       |                    | -                  |
| TFAM                                                                                        | transcription factor A, mitochondrial                                                             |                    | -                  |
| TOMM40                                                                                      | translocase of outer mitochondrial membrane 40 homolog (yeast)                                    |                    | -                  |
| TRAP1                                                                                       | TNF receptor-associated protein 1                                                                 |                    | -                  |
| TRIP13                                                                                      | thyroid hormone receptor interactor 13                                                            | -                  |                    |
| TSFM                                                                                        | Ts translation elongation factor, mitochondrial                                                   |                    | -                  |
| UBE2M                                                                                       | ubiquitin-conjugating enzyme E2M (UBC12 homolog, yeast)                                           | -                  |                    |
| UBE2S                                                                                       | ubiquitin-conjugating enzyme E2S                                                                  | -                  |                    |
| UBTF                                                                                        | upstream binding transcription factor, RNA polymerase I                                           |                    | -                  |
| VAR2                                                                                        | valyl-tRNA synthetase                                                                             |                    | -                  |
| XPOT                                                                                        | exportin, tRNA (nuclear export receptor for tRNAs)                                                | -                  |                    |
| YARS                                                                                        | tyrosyl-tRNA synthetase                                                                           |                    | -                  |
| ZNF259                                                                                      | zinc finger protein 259                                                                           | -                  | -                  |
