# Supplementary material for: Gene expression profiling of leukemic cells and primary thymocytes predicts a signature for apoptotic sensitivity to glucocorticoids
Source: Springer Nature journal article supplement (doi:10.1186/1475-2867-7-18), 2007-11-28
Supplement: Additional file 4 [file 1475-2867-7-18-s4.pdf]

| Additional file 4: Genes present on both HG_U95 Av2 and HGU133 Plus 2.0 chips. |                                                                                 |           |            |           |            |           |            |           |            |           |            |           |            |
|--------------------------------------------------------------------------------|---------------------------------------------------------------------------------|-----------|------------|-----------|------------|-----------|------------|-----------|------------|-----------|------------|-----------|------------|
| Blank = "absent"                                                               |                                                                                 |           |            |           |            |           |            |           |            |           |            |           |            |
| GC-response                                                                    | Sensitive                                                                       | Sensitive | Sensitive  | Sensitive | Sensitive  | Sensitive | Sensitive  | Sensitive | Sensitive  | Sensitive | Sensitive  | Sensitive |            |
| Patient-derived cell line                                                      | Pediatric                                                                       | Pediatric | Pediatric  | Pediatric | Pediatric  | Pediatric | Adult      | Adult     | Pediatric  | Pediatric | Pediatric  | Pediatric |            |
| Cell lineage                                                                   | T-cell                                                                          | T-cell    | T-cell     | T-cell    | T-cell     | T-cell    | B-cell     | B-cell    | B-cell     | B-cell    | Myeloid    | Myeloid   |            |
| Sub-type of leukemia                                                           | ALL                                                                             | ALL       | ALL        | ALL       | ALL        | ALL       | ALL        | ALL       | ALL        | ALL       | AML        | AML       |            |
| Name                                                                           | Description                                                                     | C7-14 Dx  | C7-14 Dx   | C7-14 Z   | C7-14 Z    | C1-6 Dx   | C1-6 Dx    | RS4 Dx    | RS4 Dx     | SUP Dx    | SUP Dx     | Kas Dx    | Kas Dx     |
|                                                                                |                                                                                 |           | Stat. sign |           | Stat. sign |           | Stat. sign |           | Stat. sign |           | Stat. sign |           | Stat. sign |
| 76P                                                                            | gamma tubulin ring complex protein (76p gene)                                   |           |            |           |            | 1.3       |            | -1.9      | -1.9       | -1.6      | -1.6       | 1.6       | 1.6        |
| AANAT                                                                          | arylalkylamine N-acetyltransferase                                              | 1.4       |            |           |            | 1.5       |            |           |            |           |            |           |            |
| AARS                                                                           | alanyl-tRNA synthetase                                                          | -1.3      | -1.3       | -1.3      | -1.3       | -1.2      |            | -2.0      | -2.0       | -1.9      | -1.9       | -1.5      | -1.5       |
| AASDHPPT                                                                       | aminoadipate-semialdehyde dehydrogenase-phosphopantetheinyl transferase         | -1.4      |            | -1.4      | -1.4       | -1.7      |            | -1.4      | -1.4       | -1.3      | -1.3       |           |            |
| AATF                                                                           | apoptosis antagonizing transcription factor                                     | -1.5      |            | -1.5      | -1.5       | -1.4      | -1.4       | -1.3      | -1.3       |           |            |           |            |
| ABAT                                                                           | 4-aminobutyrate aminotransferase                                                |           |            |           |            |           |            | -21.9     | -21.9      | -1.6      |            | 14.5      | 14.5       |
| ABCB10                                                                         | ATP-binding cassette, sub-family B (MDR/TAP), member 10                         |           |            |           |            |           |            |           |            | 1.3       | 1.3        | -1.7      | -1.7       |
| ABCB6                                                                          | ATP-binding cassette, sub-family B (MDR/TAP), member 6                          | 1.3       | 1.3        |           |            |           |            | -1.6      | -1.6       | 1.2       |            | 3.4       | 3.4        |
| ABCB7                                                                          | ATP-binding cassette, sub-family B (MDR/TAP), member 7                          | 1.2       |            |           |            |           |            | 1.3       | 1.3        |           |            |           |            |
| ABCB9                                                                          | ATP-binding cassette, sub-family B (MDR/TAP), member 9                          | 1.5       |            | 1.3       |            |           |            |           |            |           |            |           |            |
| ABCC1                                                                          | ATP-binding cassette, sub-family C (CFTR/MRP), member 1                         |           |            | 1.7       | 1.7        | 1.5       | 1.5        | 1.9       | 1.9        | -2.0      | -2.0       | -3.3      | -3.3       |
| ABCC5                                                                          | ATP-binding cassette, sub-family C (CFTR/MRP), member 5                         | 2.1       | 2.1        | 2.0       | 2.0        | 1.8       |            | -1.4      | -1.4       | -1.8      | -1.8       | 1.3       |            |
| ABCD3                                                                          | ATP-binding cassette, sub-family D (ALD), member 3                              |           |            | 1.4       |            | 1.2       |            | 1.5       |            |           |            | -1.8      | -1.8       |
| ABCE1                                                                          | ATP-binding cassette, sub-family E (OABP), member 1                             | -1.5      | -1.5       | -2.0      | -2.0       | -1.7      |            | 1.4       | 1.4        | -2.0      | -2.0       | -4.2      | -4.2       |
| ABCF1                                                                          | ATP-binding cassette, sub-family F (GCN20), member 1                            |           |            |           |            |           |            |           |            | -1.5      | -1.5       | -2.0      | -2.0       |
| ABCF2                                                                          | ATP-binding cassette, sub-family F (GCN20), member 2                            |           |            |           |            |           |            |           |            | -1.9      | -1.9       | -1.9      | -1.9       |
| ABCG1                                                                          | ATP-binding cassette, sub-family G (WHITE), member 1                            |           |            |           |            | -2.0      | -2.0       |           |            |           |            |           |            |
| ABI1                                                                           | abl-interactor 1                                                                | 1.3       |            | 1.8       | 1.8        | 1.3       |            | 1.4       | 1.4        | 1.7       | 1.7        | 2.8       | 2.8        |
| ABI2                                                                           | abl interactor 2                                                                |           |            | 1.8       | 1.8        | -1.5      |            | 1.3       | 1.3        | -1.9      | -1.9       | -2.7      | -2.7       |
| ABL1                                                                           | v-abl Abelson murine leukemia viral oncogene homolog 1                          |           |            | -1.2      |            | 1.5       |            |           |            |           |            | -1.4      | -1.4       |
| ABLIM1                                                                         | actin binding LIM protein 1                                                     |           |            |           |            |           |            | -5.8      | -5.8       | -3.1      | -3.1       |           |            |
| ABR                                                                            | active BCR-related gene                                                         |           |            |           |            |           |            |           |            |           |            | 1.4       | 1.4        |
| ACAA1                                                                          | acetyl-Coenzyme A acyltransferase 1 (peroxisomal 3-oxoacyl-Coenzyme A thiolase) |           |            |           |            |           |            |           |            | -1.3      | -1.3       | 1.2       | 1.2        |
| ACACA                                                                          | acetyl-Coenzyme A carboxylase alpha                                             | -1.2      |            |           |            |           |            |           |            |           |            | -6.5      | -6.5       |
| ACACB                                                                          | acetyl-Coenzyme A carboxylase beta                                              |           |            |           |            | 1.8       |            | 9.5       | 9.5        |           |            | 1.7       | 1.7        |
| ACADM                                                                          | acyl-Coenzyme A dehydrogenase, C-4 to C-12 straight chain                       |           |            |           |            |           |            | -1.8      | -1.8       |           |            | 1.7       | 1.7        |
| ACADSB                                                                         | acyl-Coenzyme A dehydrogenase, short/branched chain                             | 1.2       |            |           |            |           |            |           |            | -2.0      | -2.0       | 1.4       |            |
| ACADVL                                                                         | acyl-Coenzyme A dehydrogenase, very long chain                                  | 1.4       |            |           |            |           |            |           |            | 1.2       |            |           |            |
| ACAT2                                                                          | acetyl-Coenzyme A acetyltransferase 2 (acetoacetyl Coenzyme A thiolase)         |           |            | -2.0      | -2.0       |           |            | -2.4      | -2.4       | -1.5      | -1.5       | 1.3       |            |
| ACBD3                                                                          | acyl-Coenzyme A binding domain containing 3                                     |           |            |           |            |           |            | -2.0      | -2.0       | 1.6       | 1.4        | 1.5       | 1.5        |
| ACD                                                                            | adrenocortical dysplasia homolog (mouse)                                        |           |            |           |            |           |            | -1.3      | -1.3       |           |            |           |            |
| ACIN1                                                                          | apoptotic chromatin condensation inducer 1                                      |           |            |           |            |           |            |           |            |           |            | 1.6       | 1.6        |
| ACLY                                                                           | ATP citrate lyase                                                               | -1.3      |            | -1.8      | -1.8       | -1.2      |            | -1.4      | -1.4       | -1.7      | -1.7       | -1.3      | -1.3       |
| ACO1                                                                           | aconitase 1, soluble                                                            | 1.3       | 1.3        | 2.0       | 2.0        | 1.4       | 1.4        | 1.4       | 1.4        | -1.4      |            | -1.2      | -1.2       |
| ACO2                                                                           | aconitase 2, mitochondrial                                                      |           |            | -1.3      |            | -1.5      |            |           |            |           |            | -1.6      | -1.6       |
| ACOT2                                                                          | acyl-CoA thioesterase 2                                                         |           |            |           |            |           |            | 5.0       | 5.0        |           |            | -7.8      | -7.8       |
| ACOT7                                                                          | acyl-CoA thioesterase 7                                                         |           |            |           |            |           |            | -1.6      | -1.6       | -1.4      | -1.4       | -1.3      | -1.3       |
| ACOX1                                                                          | acyl-Coenzyme A oxidase 1, palmitoyl                                            | 1.4       |            |           |            |           |            | 5.2       | 5.2        | 1.2       |            | -3.5      | -3.5       |
| ACP1                                                                           | acid phosphatase 1, soluble                                                     |           |            |           |            |           |            | -2.1      | -2.1       |           |            | -1.8      | -1.8       |
| ACP2                                                                           | acid phosphatase 2, lysosomal                                                   | 1.6       | 1.6        | 1.6       | 1.6        |           |            |           |            |           |            |           |            |
| ACR                                                                            | acrosin                                                                         |           |            | -1.4      |            |           |            |           |            |           |            |           |            |
| ACSL3                                                                          | acyl-CoA synthetase long-chain family member 3                                  | -1.3      |            | -1.5      | -1.5       | -1.3      |            | -1.8      | -1.8       | -1.3      | -1.3       | 2.2       | 2.2        |
| ACSL4                                                                          | acyl-CoA synthetase long-chain family member 4                                  | -1.4      |            | 1.4       |            |           |            | -1.7      | -1.7       |           |            | 1.4       |            |
| ACTA1                                                                          | actin, alpha 1, skeletal muscle                                                 | 1.3       |            | 1.7       |            |           |            |           |            |           |            |           |            |
| ACTB                                                                           | actin, beta                                                                     |           |            |           |            |           |            | -1.5      | -1.5       |           |            | 1.6       | 1.6        |
| ACTG1                                                                          | actin, gamma 1                                                                  | -1.2      | -1.2       |           |            |           |            |           |            |           |            |           |            |
| ACTL6A                                                                         | actin-like 6A                                                                   |           |            |           |            | -1.4      |            | -1.5      | -1.5       | -1.3      | -1.3       | -1.6      | -1.6       |
| ACTN1                                                                          | actinin, alpha 1                                                                | 1.4       |            |           |            |           |            | 5.4       | 5.4        | -1.2      | -1.2       | -3.5      | -3.5       |
| ACTN4                                                                          | actinin, alpha 4                                                                |           |            |           |            |           |            | -1.6      |            | 1.4       |            | 1.7       | 1.7        |









|               |                                                                                         |      |      |      |      |      |      |      |      |       |       |      |      |      |      |
|---------------|-----------------------------------------------------------------------------------------|------|------|------|------|------|------|------|------|-------|-------|------|------|------|------|
| ATP9B         | ATPase, Class II, type 9B                                                               |      |      |      |      |      |      | -1.7 | -1.7 |       |       |      |      | -1.3 |      |
| ATR           | ataxia telangiectasia and Rad3 related                                                  |      |      |      |      | -1.2 |      |      |      |       |       |      |      | -1.3 | -1.3 |
| ATRN          | attractin                                                                               | -1.2 |      | 1.3  |      |      |      |      |      | 1.6   |       |      |      | -1.4 | -1.4 |
| ATRX          | alpha thalassemia/mental retardation syndrome X-linked (RAD54 homolog, S. cerevisiae)   |      |      |      |      | -1.3 |      |      |      | 1.4   | 1.4   |      |      | 1.7  | 1.7  |
| ATXN10        | ataxin 10                                                                               | -1.3 | -1.3 | -1.3 | -1.3 | -1.5 | -1.5 |      |      | 1.3   |       |      |      | -1.7 | -1.7 |
| ATXN2         | ataxin 2                                                                                | -1.4 |      |      |      | -1.3 |      |      |      |       |       | -1.3 |      | -1.3 |      |
| ATXN2L        | ataxin 2-like                                                                           |      |      |      |      |      |      |      |      | -2.2  | -2.2  |      |      | 1.8  | 1.8  |
| ATXN3         | ataxin 3                                                                                |      |      | 1.4  |      | 1.2  |      |      |      | 1.2   |       | 1.4  | 1.3  | 2.0  | 2.0  |
| AUH           | AU RNA binding protein/enoyl-Coenzyme A hydratase                                       | 2.5  | 2.5  | 2.2  | 2.2  | 1.7  | 1.7  |      |      |       |       | 1.4  |      | 2.4  | 2.4  |
| AURKB         | aurora kinase B                                                                         |      |      |      |      |      |      |      |      | -3.3  | -3.3  | 1.4  | 1.4  | 3.0  | 3.0  |
| B2M           | beta-2-microglobulin                                                                    | -1.5 |      |      |      |      |      |      |      | -1.6  | -1.6  |      |      | 3.1  | 3.1  |
| B3GNT1        | UDP-GlcNAc:betaGal beta-1,3-N-acetylglucosaminyltransferase 1                           |      |      | -1.6 |      |      |      |      |      | -2.7  | -2.7  | -1.4 |      | 1.4  |      |
| B4GALT1       | UDP-Gal:betaGlcNAc beta 1,4- galactosyltransferase, polypeptide 1                       |      |      | -1.3 |      |      |      |      |      | 1.3   |       | 1.3  | 1.3  | 1.7  | 1.7  |
| B4GALT2       | UDP-Gal:betaGlcNAc beta 1,4- galactosyltransferase, polypeptide 2                       | -1.8 | -1.8 | -3.3 | -3.3 |      |      |      |      | -1.3  |       | -2.1 | -2.1 | -2.4 | -2.4 |
| B4GALT3       | UDP-Gal:betaGlcNAc beta 1,4- galactosyltransferase, polypeptide 3                       | -1.3 |      | -1.4 |      |      |      |      |      | 1.3   |       | -1.3 |      | -1.4 | -1.4 |
| B4GALT4       | UDP-Gal:betaGlcNAc beta 1,4- galactosyltransferase, polypeptide 4                       |      |      | 1.6  | 1.6  |      |      |      |      | 1.5   |       |      |      | 8.1  | 8.1  |
| B4GALT6       | UDP-Gal:betaGlcNAc beta 1,4- galactosyltransferase, polypeptide 6                       |      |      |      |      | -1.6 |      |      |      | 2.5   | 2.5   | 1.6  |      | -6.7 | -6.7 |
| B930013M22RIK | ras responsive element binding protein 1                                                |      |      | 1.3  |      |      |      |      |      | 3.1   | 3.1   | 2.1  | 2.1  | 1.5  | 1.5  |
| BACH1         | BTB and CNC homology 1, basic leucine zipper transcription factor 1                     |      |      | 1.3  |      | 1.3  |      |      |      | 1.2   | 1.2   | 1.3  | 1.3  | 1.2  | 1.2  |
| BAD           | BCL2-antagonist of cell death                                                           | 1.2  |      |      |      |      |      |      |      |       |       |      |      |      |      |
| BAG1          | BCL2-associated athanogene                                                              |      |      |      |      |      |      |      |      | -1.2  |       | -1.4 | -1.4 | -2.0 | -2.0 |
| BAG2          | BCL2-associated athanogene 2                                                            | -1.2 |      |      |      | -1.6 |      |      |      | -1.2  | -1.2  | -1.8 | -1.8 | -1.5 | -1.5 |
| BAG5          | BCL2-associated athanogene 5                                                            |      |      |      |      | -1.3 |      |      |      |       |       |      |      | -1.4 | -1.4 |
| BAIAP1        | membrane associated guanylate kinase, WW and PDZ domain containing 1                    |      |      |      |      | 1.7  |      |      |      | -3.3  | -3.3  |      |      | 2.1  |      |
| BAMBI         | BMP and activin membrane-bound inhibitor homolog (Xenopus laevis)                       |      |      |      |      | -1.7 | -1.7 |      |      | -2.7  | -2.7  |      |      | 1.5  | 1.5  |
| BANF1         | barrier to autointegration factor 1                                                     |      |      | -1.3 |      |      |      |      |      | -2.0  | -2.0  | -1.5 | -1.5 |      |      |
| BAP1          | BRCA1 associated protein-1 (ubiquitin carboxy-terminal hydrolase)                       |      |      |      |      |      |      |      |      |       |       | -1.7 | -1.7 | -1.2 |      |
| BAPX1         | bagpipe homeobox homolog 1 (Drosophila)                                                 |      |      | 1.3  |      |      |      |      |      |       |       |      |      |      |      |
| BARD1         | BRCA1 associated RING domain 1                                                          | 1.3  | 1.3  |      |      |      |      |      |      | -3.6  | -3.6  | 1.4  | 1.3  | 3.4  | 3.4  |
| BAT1          | HLA-B associated transcript 1                                                           |      |      |      |      |      |      |      |      | 1.5   | 1.5   | -1.6 | -1.6 | -1.4 |      |
| BAT2D1        | BAT2 domain containing 1                                                                | 1.4  |      |      |      |      | -1.2 |      |      | 1.2   |       | -1.4 |      | -1.4 | -1.4 |
| BAT3          | HLA-B associated transcript 3                                                           |      |      |      |      |      |      |      |      | -1.4  | -1.4  | -1.4 | -1.4 |      |      |
| BAT8          | euchromatic histone-lysine N-methyltransferase 2                                        |      |      | -1.4 | -1.4 |      |      |      |      |       |       | -4.0 | -4.0 | -2.8 | -2.8 |
| BAX           | BCL2-associated X protein                                                               | -1.2 |      | -1.4 | -1.4 | 1.3  |      |      |      | -1.8  | -1.8  |      |      |      |      |
| BAZ1A         | bromodomain adjacent to zinc finger domain, 1A                                          | -1.2 |      | -1.3 | -1.3 | -1.6 | -1.6 |      |      | 1.3   |       |      |      | -1.6 | -1.6 |
| BAZ1B         | bromodomain adjacent to zinc finger domain, 1B                                          |      |      |      |      | -1.2 |      |      |      | -1.9  | -1.9  | -1.2 | -1.2 |      |      |
| BAZ2A         | bromodomain adjacent to zinc finger domain, 2A                                          | 1.3  |      |      |      |      |      |      |      |       |       |      |      | -2.9 | -2.9 |
| BBS4          | Bardet-Biedl syndrome 4                                                                 |      |      |      |      | -2.3 | -2.3 |      |      |       |       | -1.2 |      |      |      |
| BBX           | bobby sox homolog (Drosophila)                                                          |      |      | 1.5  | 1.5  |      |      |      |      | 1.6   | 1.6   | -1.3 | -1.3 | 1.8  | 1.8  |
| BC-2          | chromatin modifying protein 2A                                                          | 1.2  |      | 1.4  |      |      |      |      |      | -1.4  | -1.4  | 1.5  | 1.5  | 1.5  | 1.5  |
| BCAP29        | B-cell receptor-associated protein 29                                                   |      |      | 1.6  |      |      |      |      |      | 2.0   | 2.0   | 1.5  | 1.5  | 1.4  |      |
| BCAP31        | B-cell receptor-associated protein 31                                                   |      |      |      |      |      |      |      |      |       |       |      |      |      |      |
| BCAS2         | breast carcinoma amplified sequence 2                                                   |      |      | -1.4 |      | -1.9 |      |      |      |       |       |      |      |      |      |
| BCAT1         | branched chain aminotransferase 1, cytosolic                                            | 1.4  |      | 1.3  |      |      |      |      |      | -4.9  | -4.9  | -3.3 | -3.3 | 2.2  | 2.2  |
| BCAT2         | branched chain aminotransferase 2, mitochondrial                                        | -1.3 | -1.3 | -1.3 |      | -1.6 |      |      |      | 1.7   | 1.7   |      |      | -2.7 | -2.7 |
| BCKDHA        | branched chain keto acid dehydrogenase E1, alpha polypeptide                            |      |      | 1.3  | 1.3  |      |      |      |      | 1.5   |       |      |      | -2.2 | -2.2 |
| BCKDHB        | branched chain keto acid dehydrogenase E1, beta polypeptide (maple syrup urine disease) |      |      |      |      | -1.4 |      |      |      | 2.2   | 2.2   |      |      | -2.5 | -2.5 |
| BCL10         | B-cell CLL/lymphoma 10                                                                  |      |      |      |      |      |      |      |      | 1.2   | 1.2   | -1.5 |      |      |      |
| BCL11A        | B-cell CLL/lymphoma 11A (zinc finger protein)                                           | -1.2 |      |      |      |      |      |      |      | -1.8  | -1.8  |      |      | 1.2  | 1.2  |
| BCL2          | B-cell CLL/lymphoma 2                                                                   | 1.4  |      |      |      |      |      |      |      | -11.2 | -11.2 | -2.8 | -2.8 | 1.5  | 1.5  |
| BCL2L1        | BCL2-like 1                                                                             | -1.3 |      | -1.4 | -1.4 | -2.0 |      |      |      |       |       | 1.7  | 1.7  |      |      |
| BCL2L11       | BCL2-like 11 (apoptosis facilitator)                                                    | 3.1  | 3.1  | 14.5 | 14.5 | 5.9  | 5.9  |      |      | 1.5   | 1.2   | 3.1  | 3.1  | 5.1  | 5.1  |
| BCL6          | B-cell CLL/lymphoma 6 (zinc finger protein 51)                                          | 1.7  |      | 3.0  | 3.0  |      |      |      |      | -11.8 | -11.8 | 1.3  |      | 6.6  | 6.6  |
| BCL7A         | B-cell CLL/lymphoma 7A                                                                  |      |      | -1.4 | -1.4 | -1.4 |      |      |      | -3.3  | -3.3  | -1.3 | -1.3 | 1.6  | 1.5  |
| BCL7B         | B-cell CLL/lymphoma 7B                                                                  |      |      |      |      | -1.2 |      |      |      | -1.4  | -1.4  | -1.4 |      |      |      |
| BCLAF1        | BCL2-associated transcription factor 1                                                  | -1.3 | -1.3 |      |      | -1.5 |      |      |      | 2.0   | 2.0   | -1.7 | -1.7 | -1.8 | -1.8 |
| BCR           | breakpoint cluster region                                                               | 1.2  |      | 1.8  | 1.8  | 1.3  |      |      |      | -1.4  | -1.4  |      |      | 4.7  | 4.7  |
| BDH1          | 3-hydroxybutyrate dehydrogenase, type 1                                                 | -1.3 | -1.3 | -1.5 |      | -1.5 | -1.5 |      |      | -1.3  | -1.3  | -1.7 |      | -1.6 | -1.6 |

|          |                                                                                                         |      |      |      |      |      |      |       |       |      |      |        |        |     |
|----------|---------------------------------------------------------------------------------------------------------|------|------|------|------|------|------|-------|-------|------|------|--------|--------|-----|
| BECN1    | beclin 1 (coiled-coil, myosin-like BCL2 interacting protein)                                            |      |      |      |      |      |      | 1.2   |       |      |      |        | 1.7    | 1.7 |
| BET1     | BET1 homolog (S. cerevisiae)                                                                            |      |      |      |      |      | -1.4 | -2.2  | -2.2  | -1.4 |      |        | 1.6    | 1.6 |
| BHLHB2   | basic helix-loop-helix domain containing, class B, 2                                                    | -1.3 |      |      |      |      | -2.0 |       |       |      |      |        |        |     |
| BICD1    | bicaudal D homolog 1 (Drosophila)                                                                       | 1.3  |      |      |      |      |      | -2.6  | -2.6  | -1.4 | -1.4 | 3.6    | 3.6    |     |
| BICD2    | bicaudal D homolog 2 (Drosophila)                                                                       |      |      | -1.5 | -1.5 |      |      | -1.2  | -1.2  | -1.9 | -1.9 | 1.3    | -1.2   |     |
| BID      | BH3 interacting domain death agonist                                                                    | 1.4  | 1.4  | 1.6  | 1.6  | 1.5  |      | -3.4  | -3.4  | -1.9 | -1.9 | -1.3   | -1.3   |     |
| BIK      | BCL2-interacting killer (apoptosis-inducing)                                                            |      |      | -1.7 | -1.7 | 2.0  | 2.0  |       |       | 6.3  | 6.3  |        |        |     |
| BIN1     | bridging integrator 1                                                                                   |      |      |      |      | 1.6  | 1.6  | -1.3  | -1.3  |      |      | 9.6    | 9.6    |     |
| BIRC2    | baculoviral IAP repeat-containing 2                                                                     | 1.9  | 1.9  | 1.7  | 1.7  | 1.5  |      | 1.4   | 1.4   | 1.9  | 1.9  | 1.6    | 1.6    |     |
| BIRC3    | --                                                                                                      | 2.8  | 2.8  | 6.8  | 6.8  | 5.8  | 5.8  |       |       |      |      |        |        |     |
| BIRC5    | baculoviral IAP repeat-containing 5 (survivin)                                                          |      |      |      |      |      |      | -1.8  | -1.8  |      |      | 2.4    | 2.4    |     |
| BLCAP    | bladder cancer associated protein                                                                       |      |      |      |      |      |      | 1.4   | 1.4   | -1.5 | -1.5 | -1.4   | -1.4   |     |
| BLM      | Bloom syndrome                                                                                          |      |      |      |      |      | -1.4 |       |       | -1.8 | -1.8 | -2.6   | -2.6   |     |
| BLMH     | bleomycin hydrolase                                                                                     |      |      | 1.4  | 1.4  | -1.6 |      | 1.3   | 1.3   |      |      | -1.3   | -1.3   |     |
| BLOC1S1  | biogenesis of lysosome-related organelles complex-1, subunit 1                                          |      |      |      |      |      |      | -1.9  | -1.9  |      |      | 1.6    | 1.6    |     |
| BMP2K    | BMP2 inducible kinase                                                                                   |      |      |      |      |      |      | 1.5   | 1.5   | 1.4  |      | -1.6   | -1.6   |     |
| BNIP1    | BCL2/adenovirus E1B 19kDa interacting protein 1                                                         |      |      |      |      | 1.4  |      |       |       |      |      | -1.2   | -1.2   |     |
| BNIP2    | BCL2/adenovirus E1B 19kDa interacting protein 2                                                         | 1.5  | 1.5  |      |      |      |      | -1.4  | -1.4  | 1.7  | 1.7  | 1.4    | 1.4    |     |
| BNIP3    | BCL2/adenovirus E1B 19kDa interacting protein 3                                                         | 1.4  | 1.4  | 1.2  |      |      |      | 312.5 | 312.5 |      |      | -331.2 | -331.2 |     |
| BNIP3L   | BCL2/adenovirus E1B 19kDa interacting protein 3-like                                                    | 1.7  |      | 1.4  | 1.4  |      |      | 2.0   | 2.0   | -1.3 | -1.3 | 1.9    | 1.9    |     |
| BOP1     | block of proliferation 1                                                                                | -1.4 | -1.4 | -1.8 | -1.8 | -1.6 |      | 1.3   |       | -2.6 | -2.6 | -3.6   | -3.6   |     |
| BPGM     | 2,3-bisphosphoglycerate mutase                                                                          |      |      |      |      |      |      | -1.5  | -1.5  | 1.2  |      | 1.4    |        |     |
| BPHL     | biphenyl hydrolase-like (serine hydrolase; breast epithelial mucin-associated antigen)                  |      |      |      |      |      |      |       |       |      |      |        |        |     |
| BRAP     | BRCA1 associated protein                                                                                | 1.3  |      |      |      |      |      |       |       | 1.3  | 1.3  |        |        |     |
| BRCA1    | breast cancer 1, early onset                                                                            |      |      | 1.4  | 1.4  |      |      | -1.5  | -1.5  | -1.4 | -1.4 | -2.6   | -2.6   |     |
| BRCA2    | breast cancer 2, early onset                                                                            |      |      |      |      |      | -1.3 | -2.7  | -2.7  | 1.6  |      |        |        |     |
| BRD2     | bromodomain containing 2                                                                                |      |      | -1.2 | -1.2 |      |      | -1.4  |       |      |      | 1.5    | 1.5    |     |
| BRD3     | bromodomain containing 3                                                                                |      |      |      |      |      |      |       |       | -1.5 | -1.5 | -1.2   | -1.2   |     |
| BRD4     | bromodomain containing 4                                                                                | 1.2  |      | 1.2  |      | 2.1  |      | -1.3  | -1.3  |      |      | -1.7   | 1.4    |     |
| BRD8     | bromodomain containing 8                                                                                | 1.6  | 1.6  | 1.4  | 1.4  |      |      |       |       | 1.4  | 1.4  | 1.4    | 1.4    |     |
| BRE      | brain and reproductive organ-expressed (TNFRSF1A modulator)                                             |      |      |      |      |      |      | -1.8  |       | -2.1 | -2.1 | 3.0    | 3.0    |     |
| BRMS1    | breast cancer metastasis suppressor 1                                                                   |      |      | -1.6 | -1.6 |      |      | -1.6  | -1.6  |      |      |        |        |     |
| BRP44    | brain protein 44                                                                                        | 1.2  |      | 1.3  |      |      |      |       |       | -1.3 | -1.3 | -1.4   | -1.4   |     |
| BRRN1    | non-SMC condensin I complex, subunit H                                                                  |      |      |      |      |      |      | -1.9  | -1.9  |      |      | -1.8   | -1.8   |     |
| BSCL2    | Bernardinelli-Seip congenital lipodystrophy 2 (seipin)                                                  | 1.2  |      |      |      |      |      |       |       |      |      |        |        |     |
| BSG      | basigin (Ok blood group)                                                                                |      |      | -1.4 |      | 1.2  |      | 1.7   |       | -1.4 | -1.4 | -2.4   | -2.4   |     |
| BST1     | bone marrow stromal cell antigen 1                                                                      |      |      |      |      | -1.3 |      |       |       |      |      |        |        |     |
| BST2     | bone marrow stromal cell antigen 2                                                                      |      |      | 1.4  | 1.4  |      |      | -1.5  | -1.5  |      |      | 1.4    | 1.4    |     |
| BTAF1    | BTAF1 RNA polymerase II, B-TFIIID transcription factor-associated, 170kDa (Mot1 homolog, S. cerevisiae) |      |      |      |      |      |      | 1.6   | 1.6   |      |      | -2.0   | -2.0   |     |
| BTBD2    | BTB (POZ) domain containing 2                                                                           |      |      | -1.4 |      |      |      | -1.4  |       | -1.8 | -1.8 | 1.6    | 1.6    |     |
| BTF3     | basic transcription factor 3                                                                            |      |      |      |      | -1.3 |      |       |       | 1.3  |      |        |        |     |
| BTG1     | B-cell translocation gene 1, anti-proliferative                                                         | 9.3  | 9.3  | 9.1  | 9.1  | 4.4  | 4.4  | 1.2   |       | 3.9  | 3.9  | 8.8    | 8.8    |     |
| BTG2     | BTG family, member 2                                                                                    | 3.1  | 3.1  | 2.9  | 2.9  | 2.3  | 2.3  |       |       | 3.9  | 3.9  | 58.4   | 58.4   |     |
| BTG3     | BTG family, member 3                                                                                    | -1.2 |      | -1.2 |      |      |      | -1.6  | -1.6  | 1.2  |      | -2.2   | -2.2   |     |
| BTN3A2   | butyrophilin, subfamily 3, member A2                                                                    |      |      |      |      |      |      | -5.8  | -5.8  | -1.2 |      | 3.9    | 3.9    |     |
| BTN3A3   | butyrophilin, subfamily 3, member A3                                                                    |      |      |      |      | -2.0 |      | -5.9  | -5.9  | -1.4 | -1.4 | 4.2    | 4.2    |     |
| BUB1     | BUB1 budding uninhibited by benzimidazoles 1 homolog (yeast)                                            |      |      | 1.4  |      |      |      | -1.3  | -1.3  | 1.4  | 1.4  | -1.3   | -1.3   |     |
| BUB1B    | BUB1 budding uninhibited by benzimidazoles 1 homolog beta (yeast)                                       | 1.3  |      |      |      |      |      | -1.9  | -1.9  |      |      | 1.3    |        |     |
| BUB3     | BUB3 budding uninhibited by benzimidazoles 3 homolog (yeast)                                            |      |      |      |      |      |      | -1.4  | -1.4  | 1.3  | 1.3  | -1.4   | -1.4   |     |
| BUD31    | BUD31 homolog (yeast)                                                                                   |      |      |      |      |      |      |       |       |      |      |        |        |     |
| BYSL     | bystin-like                                                                                             | -2.2 | -2.2 | -1.8 | -1.8 | -2.3 | -2.3 | -6.2  | -6.2  | -8.4 | -8.4 | -4.0   | -4.0   |     |
| BZRP     | translocator protein (18kDa)                                                                            | 1.3  |      | 1.4  |      | 1.4  |      |       |       | -1.8 | -1.8 | -1.4   | -1.4   |     |
| C13ORF24 | chromosome 13 open reading frame 24                                                                     |      |      |      |      | -1.2 |      | 1.2   | 1.2   |      |      | -1.5   | -1.5   |     |
| C14ORF11 | chromosome 14 open reading frame 11                                                                     | -1.5 |      | 1.4  |      |      |      |       |       |      |      |        |        |     |
| C19ORF10 | chromosome 19 open reading frame 10                                                                     | -1.3 |      | -1.5 | -1.5 |      |      | 1.3   | 1.3   |      |      | -2.2   | -2.2   |     |
| C19ORF2  | chromosome 19 open reading frame 2                                                                      | -1.3 |      | -1.4 | -1.4 | -1.2 |      | 1.8   | 1.8   | -1.3 | -1.3 | -2.7   | -2.7   |     |
| C19ORF29 | chromosome 19 open reading frame 29                                                                     |      |      | -1.2 |      | 1.7  |      |       |       | -1.6 | -1.6 |        |        |     |
| C1D      | nuclear DNA-binding protein                                                                             |      |      | -1.3 | -1.3 | -1.4 |      | -1.6  | -1.6  |      |      |        |        |     |



|         |                                                                                                    |      |      |      |      |      |      |       |       |       |      |      |     |       |       |
|---------|----------------------------------------------------------------------------------------------------|------|------|------|------|------|------|-------|-------|-------|------|------|-----|-------|-------|
| CAT     | catalase                                                                                           |      | 1.3  | 1.3  | 1.8  | 1.8  |      |       | 4.5   | 4.5   | -1.3 | -1.3 |     | 1.4   | 1.4   |
| CBFA2T2 | core-binding factor, runt domain, alpha subunit 2; translocated to, 2                              |      |      |      | 1.4  |      | 1.2  |       | 1.5   | 1.5   | 1.3  |      |     | -1.3  | -1.3  |
| CBFA2T3 | core-binding factor, runt domain, alpha subunit 2; translocated to, 3                              | -2.1 | -2.1 | -2.3 | -2.3 |      |      |       |       |       | 1.5  | 1.5  |     | 1.3   | 1.3   |
| CBFB    | core-binding factor, beta subunit                                                                  |      |      |      |      |      |      |       | -2.3  | -2.3  |      |      |     | 1.5   | 1.5   |
| CBL     | Cas-Br-M (murine) ecotropic retroviral transforming sequence                                       |      |      | -1.3 |      |      |      |       | 1.6   | 1.6   |      |      |     | -1.2  |       |
| CBLB    | Cas-Br-M (murine) ecotropic retroviral transforming sequence b                                     |      |      | 2.1  | 2.1  | 1.2  |      |       | -1.6  | -1.6  | 1.8  | 1.8  |     | 4.1   | 4.1   |
| CBX1    | chromobox homolog 1 (HP1 beta homolog Drosophila )                                                 |      |      |      |      | -1.4 |      |       |       |       |      |      |     | -1.6  | -1.6  |
| CBX3    | chromobox homolog 3 (HP1 gamma homolog, Drosophila)                                                | -1.2 |      | -1.3 |      |      |      |       | 2.2   | 2.2   | -1.8 |      | 1.2 | -2.1  | -2.1  |
| CBX5    | chromobox homolog 5 (HP1 alpha homolog, Drosophila)                                                | 1.2  |      |      |      | -1.2 |      |       | -10.9 | -10.9 | -2.1 |      |     | 3.1   | 3.1   |
| CBX6    | chromobox homolog 6                                                                                | -1.3 |      | -1.3 | -1.3 |      |      |       | -1.4  | -1.4  | -2.1 | -2.1 |     | -2.0  | -2.0  |
| CBX7    | chromobox homolog 7                                                                                |      |      |      |      |      |      |       |       |       |      |      |     |       |       |
| CCBL1   | cysteine conjugate-beta lyase; cytoplasmic (glutamine transaminase K, kynurenine aminotransferase) |      |      |      |      |      | 1.4  |       |       |       |      |      |     |       |       |
| CCBP2   | chemokine binding protein 2                                                                        |      |      | -1.2 |      |      | 1.7  |       |       |       |      |      |     |       |       |
| CCDC28A | coiled-coil domain containing 28A                                                                  | 1.6  | 1.6  | 1.7  | 1.7  |      |      |       | -1.3  | -1.3  |      |      |     | 1.8   | 1.8   |
| CCDC6   | coiled-coil domain containing 6                                                                    | 1.3  |      | 2.4  | 2.4  | 1.6  |      |       | 2.6   | 2.6   | 1.9  | 1.9  |     | -4.5  | -4.5  |
| CCDC85B | coiled-coil domain containing 85B                                                                  | -1.4 |      | -1.9 | -1.9 | -1.3 |      |       | 1.2   |       | -1.8 | -1.8 |     | -4.1  | -4.1  |
| CCHCR1  | coiled-coil alpha-helical rod protein 1                                                            |      |      |      |      | 1.4  | 1.4  |       | -1.3  |       | 1.2  |      |     | 1.5   |       |
| CCKAR   | cholecystokinin A receptor                                                                         | 1.2  |      |      |      |      |      |       |       |       |      |      |     |       |       |
| CCNA2   | cyclin A2                                                                                          |      |      | 1.3  |      |      |      |       | -2.2  | -2.2  | 1.3  | 1.3  |     | 1.5   | 1.5   |
| CCNB1   | cyclin B1                                                                                          |      |      |      |      |      |      |       | -1.5  | -1.5  | 1.9  | 1.9  |     | 2.6   | 2.6   |
| CCNB2   | cyclin B2                                                                                          | 1.4  | 1.4  | 1.5  | 1.5  |      |      |       |       |       | 1.4  | 1.4  |     | 1.4   | 1.4   |
| CCNC    | cyclin C                                                                                           |      |      | 1.5  |      | -1.2 |      |       | 1.4   | 1.3   | -1.8 |      |     | -1.4  | -1.4  |
| CCND3   | cyclin D3                                                                                          |      |      | -1.4 | -1.4 | -1.8 | -1.8 | -10.6 | -10.6 | -10.6 |      |      |     | 7.2   | 7.2   |
| CCNE1   | cyclin E1                                                                                          |      |      | 1.7  |      |      |      |       | 2.3   | 2.3   |      |      |     | -14.9 | -14.9 |
| CCNE2   | cyclin E2                                                                                          | 1.2  | 1.2  | 1.3  | 1.3  |      |      |       | -2.9  | -2.9  | -1.3 | -1.3 |     | 2.2   | 2.2   |
| CCNF    | cyclin F                                                                                           | 1.3  |      | 1.2  |      | 1.6  |      |       | -2.6  | -2.6  | 2.0  | 2.0  |     | 2.7   | 2.7   |
| CCNG1   | cyclin G1                                                                                          |      |      | 1.7  |      | 1.3  |      |       | 1.8   | 1.8   | 1.3  | 1.3  |     |       |       |
| CCNG2   | cyclin G2                                                                                          | 2.3  | 2.3  | 1.6  | 1.6  | 1.3  |      |       |       |       | 2.2  | 2.2  |     | 3.1   | 3.1   |
| CCNH    | cyclin H                                                                                           |      |      |      |      |      |      |       | 1.6   | 1.6   | 1.3  | 1.3  |     | -1.5  | -1.5  |
| CCNI    | cyclin I                                                                                           |      |      | 1.3  |      |      |      |       | -1.7  | -1.7  | 1.5  | 1.5  |     | 1.6   | 1.6   |
| CCNT1   | cyclin T1                                                                                          |      |      |      |      |      |      |       | 1.3   |       |      |      |     | -1.2  |       |
| CCNT2   | cyclin T2                                                                                          | -1.4 |      | -1.2 |      |      |      |       | 2.6   | 2.6   | 2.0  | 2.0  |     | -2.0  | -2.0  |
| CCR4    | chemokine (C-C motif) receptor 4                                                                   |      |      |      |      |      | 4.7  |       |       |       |      |      |     |       |       |
| CCR7    | chemokine (C-C motif) receptor 7                                                                   | -1.6 | -1.6 | -1.4 | -1.4 | -1.4 |      |       |       |       |      |      |     |       |       |
| CCRL2   | chemokine (C-C motif) receptor-like 2                                                              | 1.2  |      | 1.5  |      |      |      |       |       |       |      |      |     |       |       |
| CCT2    | chaperonin containing TCP1, subunit 2 (beta)                                                       | -1.3 | -1.3 | -1.4 | -1.4 | -1.3 |      |       |       |       | -2.2 | -2.2 |     | -2.1  | -2.1  |
| CCT3    | chaperonin containing TCP1, subunit 3 (gamma)                                                      | -1.3 |      | -1.5 | -1.5 | -1.4 |      |       | 1.2   | 1.2   | -1.6 | -1.6 |     | -1.7  | -1.7  |
| CCT4    | chaperonin containing TCP1, subunit 4 (delta)                                                      |      |      |      |      | -1.4 |      |       |       |       | -1.4 | -1.4 |     | -1.4  | -1.4  |
| CCT5    | chaperonin containing TCP1, subunit 5 (epsilon)                                                    | -1.6 | -1.6 | -1.8 | -1.8 | -1.7 |      |       | -1.3  |       | -1.5 | -1.5 |     | -1.5  | -1.5  |
| CCT6A   | chaperonin containing TCP1, subunit 6A (zeta 1)                                                    | -1.6 | -1.6 | -1.4 | -1.4 | -1.7 | -1.7 | 4.9   | 4.9   | 4.9   | -1.4 |      |     | -5.1  | -5.1  |
| CCT7    | chaperonin containing TCP1, subunit 7 (eta)                                                        | -1.4 |      | -1.5 | -1.5 | -1.6 | -1.6 |       |       |       | -1.5 | -1.5 |     | -2.1  | -2.1  |
| CCT8    | chaperonin containing TCP1, subunit 8 (theta)                                                      | -1.7 |      | -1.5 | -1.5 | -1.6 |      |       | 1.2   | 1.2   | -1.6 | -1.6 |     | -1.3  | -1.3  |
| CD164   | CD164 molecule, sialomucin                                                                         | 1.3  |      | 1.4  | 1.4  | 1.5  |      |       | -1.7  | -1.7  | 1.8  | 1.8  |     | 2.6   | 2.6   |
| CD1A    | CD1a molecule                                                                                      | -1.5 |      | -1.8 | -1.8 |      |      |       |       |       |      |      |     |       |       |
| CD1C    | CD1c molecule                                                                                      | -1.4 |      |      |      |      |      |       |       |       |      |      |     |       |       |
| CD1D    | CD1d molecule                                                                                      | -2.0 | -2.0 | -1.2 |      |      |      |       |       |       |      |      |     |       |       |
| CD1E    | CD1e molecule                                                                                      | -2.6 | -2.6 | -2.0 | -2.0 |      |      |       |       |       |      |      |     |       |       |
| CD2AP   | CD2-associated protein                                                                             |      |      |      |      |      |      |       |       |       |      |      |     | 1.4   | 1.4   |
| CD34    | CD34 molecule                                                                                      |      |      |      |      |      |      |       | 12.3  | 12.3  | -3.0 | -3.0 |     | -18.1 | -18.1 |
| CD37    | CD37 molecule                                                                                      | 1.2  |      |      |      |      |      |       | 2.5   | 2.5   |      |      |     | -4.9  | -4.9  |
| CD38    | CD38 molecule                                                                                      | -1.3 |      |      |      |      |      |       | -2.9  | -2.9  | -2.4 | -2.4 |     | 8.4   | 8.4   |
| CD3D    | CD3d molecule, delta (CD3-TCR complex)                                                             | 1.2  | 1.2  | 1.3  | 1.3  |      |      |       |       |       |      |      |     |       |       |
| CD3E    | CD3e molecule, epsilon (CD3-TCR complex)                                                           |      |      | 1.2  |      | 1.3  |      |       |       |       |      |      |     |       |       |
| CD3G    | CD3g molecule, gamma (CD3-TCR complex)                                                             |      |      | 1.2  |      |      |      |       |       |       |      |      |     |       |       |
| CD3Z    | CD247 molecule                                                                                     |      |      |      |      |      |      |       |       |       |      |      |     |       |       |
| CD4     | CD4 molecule                                                                                       | 1.2  |      | 1.4  | 1.4  |      |      |       | 5.4   | 5.4   |      |      |     | -5.8  | -5.8  |
| CD40    | CD40 molecule, TNF receptor superfamily member 5                                                   |      |      |      |      | 1.5  |      |       | -1.4  | -1.4  |      |      |     | 1.3   | 1.3   |
| CD44    | CD44 molecule (Indian blood group)                                                                 | -1.7 | -1.7 |      |      | -1.9 |      |       | 3.2   | 3.2   | -3.0 | -3.0 |     | -13.1 | -13.1 |

|          |                                                                                                 |      |      |      |      |      |      |       |       |      |      |       |       |
|----------|-------------------------------------------------------------------------------------------------|------|------|------|------|------|------|-------|-------|------|------|-------|-------|
| CD47     | CD47 molecule                                                                                   | 1.7  | 1.7  | 1.9  | 1.9  | 1.5  |      | -2.4  | -2.4  | -1.7 | -1.7 | 2.0   | 2.0   |
| CD48     | CD48 molecule                                                                                   | 1.9  | 1.9  | 2.6  | 2.6  |      |      | -14.5 | -14.5 | -2.5 | -2.5 | 4.3   | 4.3   |
| CD52     | CD52 molecule                                                                                   | 1.6  |      |      |      |      |      |       |       |      |      | 98.6  | 98.6  |
| CD53     | CD53 molecule                                                                                   | 3.1  | 3.1  | 3.4  | 3.4  | 3.2  | 3.2  | 1.4   | 1.4   | 3.1  | 3.1  | 7.2   | 7.2   |
| CD58     | CD58 molecule                                                                                   |      |      | 1.3  |      |      |      | -1.3  |       | 3.0  | 3.0  | 2.5   | 2.5   |
| CD59     | CD59 molecule, complement regulatory protein                                                    | 1.3  |      | 2.2  | 2.2  | 1.8  | 1.8  | -3.7  | -3.7  | 1.3  |      | 10.6  | 10.6  |
| CD6      | CD6 molecule                                                                                    |      |      | -1.3 |      |      |      |       |       |      |      |       |       |
| CD63     | CD63 molecule                                                                                   |      |      | 1.5  | 1.5  |      |      | 1.4   | 1.4   | 1.2  | 1.2  |       |       |
| CD69     | CD69 molecule                                                                                   | 4.9  | 4.9  | 4.7  | 4.7  | 2.0  | 2.0  | 6.3   | 6.3   | 3.8  | 3.8  | -1.5  | -1.5  |
| CD7      | CD7 molecule                                                                                    | 1.3  | 1.3  |      |      | 1.3  |      |       |       |      |      |       |       |
| CD72     | CD72 molecule                                                                                   |      |      |      |      | 1.4  |      | -23.3 | -23.3 | 1.6  | 1.6  | 31.2  | 31.2  |
| CD79A    | CD79a molecule, immunoglobulin-associated alpha                                                 | 2.0  | 2.0  | 2.5  | 2.5  | 3.6  | 3.6  | -24.9 | -24.9 | 1.3  | 1.3  | 24.6  | 24.6  |
| CD81     | CD81 molecule                                                                                   | -1.2 |      | -1.3 |      | -1.2 |      | -1.9  | -1.9  |      |      | 1.3   | 1.3   |
| CD83     | CD83 molecule                                                                                   |      |      |      |      |      |      | 2.1   | 2.1   | -1.4 |      | -1.6  |       |
| CD8A     | CD8a molecule                                                                                   | 1.9  |      | 2.8  | 2.8  | 2.0  |      |       |       |      |      |       |       |
| CD99     | CD99 molecule                                                                                   | 1.2  |      | 1.5  | 1.5  | 1.8  | 1.8  | 1.7   | 1.7   | 3.4  | 3.4  | 2.6   | 2.6   |
| CDC123   | cell division cycle 123 homolog (S. cerevisiae)                                                 | -1.3 | -1.3 | -1.4 | -1.4 | -1.6 |      |       |       | -1.7 | -1.7 | -2.0  | -2.0  |
| CDC16    | cell division cycle 16 homolog (S. cerevisiae)                                                  |      |      |      |      |      |      | 1.6   | 1.6   | 1.2  | 1.2  | 1.2   |       |
| CDC2     | cell division cycle 2, G1 to S and G2 to M                                                      |      |      | -1.2 |      |      |      | -1.6  | -1.6  | 2.0  | 2.0  |       |       |
| CDC20    | cell division cycle 20 homolog (S. cerevisiae)                                                  |      |      |      |      |      |      |       |       | 1.5  | 1.5  |       |       |
| CDC23    | cell division cycle 23 homolog (S. cerevisiae)                                                  |      |      |      |      |      |      | -1.9  | -1.9  | -1.3 | -1.3 | -2.1  | -2.1  |
| CDC25A   | cell division cycle 25 homolog A (S. cerevisiae)                                                | -1.4 | -1.4 | -1.2 |      | -1.4 |      | -1.6  | -1.6  | -1.4 | -1.4 | -19.4 | -19.4 |
| CDC25B   | cell division cycle 25 homolog B (S. cerevisiae)                                                |      |      |      |      |      |      | -1.2  | -1.2  | 1.6  | 1.6  | 1.6   | 1.6   |
| CDC25C   | cell division cycle 25 homolog C (S. cerevisiae)                                                | 1.4  |      | 1.5  | 1.5  |      |      |       |       | 1.5  |      |       |       |
| CDC27    | cell division cycle 27 homolog (S. cerevisiae)                                                  |      |      |      |      |      |      | 1.2   |       | 1.4  | 1.4  | -1.5  | -1.5  |
| CDC2L1   | cell division cycle 2-like 1 (PITSLRE proteins)                                                 | 1.3  |      |      |      | 1.3  |      |       |       |      |      |       |       |
| CDC2L2   | cell division cycle 2-like 2 (PITSLRE proteins)                                                 |      |      |      |      |      |      |       |       | 1.5  | 1.5  | 1.3   |       |
| CDC2L6   | cell division cycle 2-like 6 (CDK8-like)                                                        | 1.6  |      | 1.3  |      | 1.8  | 1.8  | -1.4  | -1.4  | 3.3  | 3.3  | 3.8   | 3.8   |
| CDC34    | cell division cycle 34 homolog (S. cerevisiae)                                                  |      |      |      |      |      |      |       |       |      |      | -1.2  |       |
| CDC37    | cell division cycle 37 homolog (S. cerevisiae)                                                  |      |      | -1.3 |      | -1.2 |      |       |       |      |      |       |       |
| CDC40    | cell division cycle 40 homolog (S. cerevisiae)                                                  |      |      |      |      |      |      | 1.3   |       | -1.2 |      |       |       |
| CDC42EP3 | CDC42 effector protein (Rho GTPase binding) 3                                                   |      |      |      |      | 2.0  |      | -1.6  | -1.6  | 4.0  | 4.0  | 6.2   | 6.2   |
| CDC45L   | CDC45 cell division cycle 45-like (S. cerevisiae)                                               |      |      |      |      |      |      |       |       |      |      |       |       |
| CDC5L    | CDC5 cell division cycle 5-like (S. pombe)                                                      |      |      |      |      |      |      |       |       | 1.3  | 1.3  | 1.6   | 1.6   |
| CD6      | cell division cycle 6 homolog (S. cerevisiae)                                                   | -1.3 | -1.3 | -1.2 |      | -1.5 | -1.5 | -1.7  | -1.7  | -2.9 | -2.9 | -4.7  | -4.7  |
| CD7      | cell division cycle 7 homolog (S. cerevisiae)                                                   | 1.3  | 1.3  |      |      |      |      | -1.4  | -1.4  | -1.4 | -1.4 | -2.4  | -2.4  |
| CDH2     | cadherin 2, type 1, N-cadherin (neuronal)                                                       |      |      |      |      | -1.4 |      | 30.0  | 30.0  |      |      | -72.0 | -72.0 |
| CDH4     | cadherin 4, type 1, R-cadherin (retinal)                                                        | 1.3  |      | 1.5  | 1.5  | 1.5  |      |       |       | 2.0  | 2.0  | 1.2   |       |
| CDIPT    | CDP-diacylglycerol--inositol 3-phosphatidylinositol transferase (phosphatidylinositol synthase) |      |      |      |      |      |      | -1.6  | -1.6  | 1.4  | 1.4  | 2.8   | 2.8   |
| CDK2     | cyclin-dependent kinase 2                                                                       |      |      | 1.3  | 1.3  |      |      | -2.3  | -2.3  | -1.5 | -1.5 | -1.6  | -1.6  |
| CDK2AP1  | CDK2-associated protein 1                                                                       |      |      |      |      | -1.4 |      |       |       |      |      |       |       |
| CDK4     | cyclin-dependent kinase 4                                                                       | -1.4 | -1.4 | -1.8 | -1.8 | -1.6 | -1.6 |       |       | -2.4 | -2.4 | -4.4  | -4.4  |
| CDK5     | cyclin-dependent kinase 5                                                                       | 1.2  |      |      |      | 1.3  |      | -1.9  |       |      |      | 1.6   | 1.6   |
| CDK6     | cyclin-dependent kinase 6                                                                       |      |      | 1.6  | 1.6  | 1.2  |      | -3.0  | -3.0  | -1.5 | -1.5 | 2.1   | 2.1   |
| CDK7     | cyclin-dependent kinase 7 (MO15 homolog, Xenopus laevis, cdk-activating kinase)                 |      |      |      |      | -1.6 |      | 2.1   | 2.1   |      |      | -1.6  | -1.6  |
| CDK8     | cyclin-dependent kinase 8                                                                       |      |      | 1.2  |      |      |      | -1.5  | -1.5  |      |      | 1.3   |       |
| CDK9     | cyclin-dependent kinase 9 (CDC2-related kinase)                                                 | 1.3  |      | 1.6  | 1.6  |      |      | -7.3  | -7.3  | 1.7  | 1.7  | 10.9  | 10.9  |
| CDKN1B   | cyclin-dependent kinase inhibitor 1B (p27, Kip1)                                                | 1.7  | 1.7  | 1.4  |      |      |      | -1.6  | -1.6  | 1.6  | 1.6  | 3.6   | 3.6   |
| CDKN2C   | cyclin-dependent kinase inhibitor 2C (p18, inhibits CDK4)                                       | 1.2  |      | 1.6  | 1.6  | 1.3  |      |       |       | 1.5  | 1.3  | 1.6   | 1.6   |
| CDKN2D   | cyclin-dependent kinase inhibitor 2D (p19, inhibits CDK4)                                       |      |      |      |      |      |      |       |       |      |      | 11.1  | 11.1  |
| CDKN3    | cyclin-dependent kinase inhibitor 3 (CDK2-associated dual specificity phosphatase)              |      |      |      |      | -1.2 |      | -1.4  | -1.4  | 1.5  | 1.5  | 1.2   | 1.2   |
| CDR2     | cerebellar degeneration-related protein 2, 62kDa                                                | -1.7 |      |      |      | -1.7 |      |       |       |      |      |       |       |
| CDS2     | CDP-diacylglycerol synthase (phosphatidate cytidylyltransferase) 2                              |      |      |      |      | 1.3  |      |       |       | 1.6  | 1.6  | 1.6   | 1.5   |
| CDT1     | chromatin licensing and DNA replication factor 1                                                | -1.3 |      | -1.4 | -1.4 |      |      | -1.3  |       | -1.4 |      | -4.6  | -4.6  |
| CDYL     | chromodomain protein, Y-like                                                                    |      |      |      |      |      |      |       |       | 1.5  |      | -1.2  |       |
| CEBPB    | CCAAT/enhancer binding protein (C/EBP), beta                                                    | -1.4 |      | -1.9 | -1.9 | -1.4 |      | 1.5   | 1.5   | -1.5 | -1.5 | -3.1  | -3.1  |
| CEBPG    | CCAAT/enhancer binding protein (C/EBP), gamma                                                   | -1.2 |      |      |      |      |      | -1.3  | -1.3  |      |      | -1.6  | -1.6  |
| CEBPZ    | CCAAT/enhancer binding protein zeta                                                             | -1.5 | -1.5 | -1.4 | -1.4 | -1.8 | -1.8 | -2.2  | -1.7  | -2.6 | -1.5 | -2.5  | -2.5  |

|         |                                                                                       |      |      |      |      |      |      |       |       |      |      |      |      |
|---------|---------------------------------------------------------------------------------------|------|------|------|------|------|------|-------|-------|------|------|------|------|
| CENPA   | centromere protein A                                                                  | 1.3  |      | 1.3  | 1.3  |      |      | -1.4  | -1.3  | 1.7  | 1.7  | 1.4  | 1.4  |
| CENPB   | centromere protein B, 80kDa                                                           |      |      |      |      |      |      |       |       |      |      | -1.5 | -1.5 |
| CENPC1  | centromere protein C 1                                                                | 1.5  | 1.5  | 1.6  | 1.6  |      |      |       |       | 1.3  | 1.3  |      |      |
| CENPE   | centromere protein E, 312kDa                                                          |      |      |      |      | 1.4  | 1.4  |       |       | 1.6  | 1.6  | 2.0  | 2.0  |
| CENPF   | centromere protein F, 350/400ka (mitosin)                                             |      |      |      |      |      |      | -2.3  | -2.3  | 1.5  | 1.5  | 2.3  | 2.3  |
| CENTB1  | centaurin, beta 1                                                                     |      |      |      |      |      |      | -21.1 | -21.1 |      |      | 42.8 | 42.8 |
| CENTB2  | centaurin, beta 2                                                                     | 1.3  |      | 1.8  | 1.8  | 1.3  | 1.3  | 1.5   | 1.5   | 1.5  | 1.5  | 1.3  |      |
| CENTD1  | centaurin, delta 1                                                                    |      |      | -1.2 |      |      |      | -1.2  |       | 1.8  | 1.8  | 3.3  | 3.3  |
| CENTD2  | centaurin, delta 2                                                                    |      |      |      |      |      |      |       |       |      |      |      |      |
| CENTG2  | centaurin, gamma 2                                                                    |      |      | 1.8  |      |      |      |       |       | -1.3 | -1.3 |      |      |
| CEP110  | centrosomal protein 110kDa                                                            |      |      |      |      |      |      |       |       |      |      |      |      |
| CEP2    | centrosomal protein 250kDa                                                            | 1.2  |      |      |      |      |      |       |       |      |      |      |      |
| CETN2   | centrin, EF-hand protein, 2                                                           |      |      |      |      |      |      | -1.2  |       |      |      |      |      |
| CETN3   | centrin, EF-hand protein, 3 (CDC31 homolog, yeast)                                    | -1.4 |      | -1.3 |      | -1.4 |      | -1.5  | -1.5  |      |      |      |      |
| CFL1    | cofilin 1 (non-muscle)                                                                |      |      |      |      |      |      | -1.6  | -1.6  |      |      | 1.3  | 1.3  |
| CFLAR   | CASP8 and FADD-like apoptosis regulator                                               |      |      | 1.7  |      | 1.5  | 1.5  | 3.8   | 3.8   | 2.1  | 2.1  | -1.6 |      |
| CGB     | chorionic gonadotropin, beta polypeptide                                              |      |      |      |      | 1.3  |      |       |       |      |      |      |      |
| CGGBP1  | CGG triplet repeat binding protein 1                                                  |      |      | 1.4  |      |      |      |       |       |      |      | 1.4  | 1.4  |
| CGRRF1  | cell growth regulator with ring finger domain 1                                       | 1.8  |      | 1.3  |      | -1.2 |      |       |       |      |      | 1.2  |      |
| CH25H   | cholesterol 25-hydroxylase                                                            | 2.3  | 2.3  | 1.9  |      |      |      |       |       |      |      |      |      |
| CHAF1A  | chromatin assembly factor 1, subunit A (p150)                                         |      |      | -1.3 |      |      |      | -1.2  |       | -2.3 | -2.3 | -2.7 | -2.7 |
| CHAF1B  | chromatin assembly factor 1, subunit B (p60)                                          |      |      |      |      |      |      | -1.7  | -1.7  |      |      | -2.4 | -2.4 |
| CHC1    | regulator of chromosome condensation 1                                                | -1.7 | -1.7 | -2.1 | -2.1 | -1.6 | -1.6 | -1.2  |       | -1.8 | -1.8 | -1.7 | -1.7 |
| CHC1L   | regulator of chromosome condensation (RCC1) and BTB (POZ) domain containing protein 2 | 1.4  |      |      |      |      |      |       |       | -1.2 |      | 1.4  |      |
| CHD1    | chromodomain helicase DNA binding protein 1                                           |      |      |      |      | -1.2 |      | 1.2   |       | -1.3 | -1.3 | -1.3 | -1.3 |
| CHD3    | chromodomain helicase DNA binding protein 3                                           |      |      | 1.2  |      |      |      | -9.4  | -9.4  | -1.5 | -1.3 | 5.0  | 5.0  |
| CHD4    | chromodomain helicase DNA binding protein 4                                           |      |      |      |      | -1.2 |      |       |       | -1.4 | -1.4 |      |      |
| CHD8    | chromodomain helicase DNA binding protein 8                                           |      |      |      |      |      |      |       |       | -1.3 | -1.3 |      |      |
| CHEK1   | CHK1 checkpoint homolog (S. pombe)                                                    |      |      |      |      |      |      | -1.8  | -1.8  | -1.3 | -1.3 | -2.1 | -2.1 |
| CHERP   | calcium homeostasis endoplasmic reticulum protein                                     |      |      | -1.3 |      |      |      |       |       | -1.4 | -1.4 | -1.6 | -1.6 |
| CHES1   | checkpoint suppressor 1                                                               | 1.5  | 1.5  | 1.6  | 1.6  |      |      | 1.8   | 1.8   | 1.6  | 1.6  | 1.5  | 1.5  |
| CHI3L2  | chitinase 3-like 2                                                                    | -1.3 |      | -1.9 | -1.9 | -1.8 | -1.8 | -3.1  | -3.1  |      |      |      |      |
| CHIT1   | chitinase 1 (chitotriosidase)                                                         |      |      |      |      | 1.4  |      |       |       |      |      |      |      |
| CHP     | calcium binding protein P22                                                           | 1.2  |      | 1.2  |      | 1.3  |      | 2.4   | 2.4   |      |      | 1.6  | 1.6  |
| CHRM3   | cholinergic receptor, muscarinic 3                                                    |      |      |      |      | 1.3  |      |       |       |      |      |      |      |
| CHRNA5  | cholinergic receptor, nicotinic, alpha 5                                              |      |      |      |      |      |      | -2.2  | -2.2  | -1.5 |      | 1.7  | 1.7  |
| CHRNB1  | cholinergic receptor, nicotinic, beta 1 (muscle)                                      | 1.4  |      | 1.3  | 1.3  | 1.4  |      |       |       |      |      |      |      |
| CHST1   | carbohydrate (keratan sulfate Gal-6) sulfotransferase 1                               | 1.3  |      |      |      | 1.2  |      |       |       |      |      |      |      |
| CHST10  | carbohydrate sulfotransferase 10                                                      |      |      |      |      |      |      | 2.3   | 2.3   |      |      | -2.6 | -2.6 |
| CHST2   | carbohydrate (N-acetylglucosamine-6-O) sulfotransferase 2                             | -1.4 | -1.4 | 1.6  | 1.6  |      |      |       |       | 1.2  |      |      |      |
| CHSY1   | carbohydrate (chondroitin) synthase 1                                                 | -1.2 |      |      |      |      |      | 1.8   | 1.8   | 2.5  | 2.5  | -2.1 | -2.1 |
| CHUK    | conserved helix-loop-helix ubiquitous kinase                                          | -1.2 |      | -1.2 |      | -1.3 |      | 1.5   | 1.5   |      |      | -1.5 | -1.5 |
| CIAPIN1 | cytokine induced apoptosis inhibitor 1                                                | 1.2  |      | 1.7  | 1.7  |      |      | 1.3   | 1.3   | -1.6 | -1.6 | -1.8 | -1.8 |
| CIB1    | calcium and integrin binding 1 (calmyrin)                                             | -1.3 |      |      |      |      |      |       |       |      |      | -1.3 |      |
| CIC     | capicua homolog (Drosophila)                                                          |      |      |      |      |      |      |       |       |      |      | 2.4  | 2.4  |
| CIR     | CBF1 interacting corepressor                                                          |      |      | 1.6  | 1.6  | -1.3 |      |       |       | 1.2  |      |      |      |
| CIT     | citron (rho-interacting, serine/threonine kinase 21)                                  | 1.5  |      | 1.3  |      |      |      |       |       |      |      |      |      |
| CITED2  | Cbp/p300-interacting transactivator, with Glu/Asp-rich carboxy-terminal domain, 2     | 1.3  |      | 1.4  |      |      |      | 10.5  | 10.5  | 2.8  | 2.8  | -7.0 | -7.0 |
| CKAP5   | cytoskeleton associated protein 5                                                     |      |      |      |      |      |      |       |       |      |      |      |      |
| CKB     | creatine kinase, brain                                                                |      |      |      |      | 1.3  |      | 3.2   | 3.2   |      |      | -5.0 | -5.0 |
| CKM     | creatine kinase, muscle                                                               |      |      |      |      | 1.3  |      |       |       |      |      |      |      |
| CKS1B   | CDC28 protein kinase regulatory subunit 1B                                            | -1.4 |      | -1.6 | -1.6 |      |      | -1.6  | -1.6  |      |      | -1.4 | -1.4 |
| CKS2    | CDC28 protein kinase regulatory subunit 2                                             |      |      |      |      |      |      | -1.3  | -1.3  | 1.2  | 1.2  |      |      |
| CLASP1  | cytoplasmic linker associated protein 1                                               |      |      |      |      | 1.7  | 1.7  | 1.5   | 1.5   | 1.7  |      | 1.8  | 1.8  |
| CLASP2  | cytoplasmic linker associated protein 2                                               |      |      |      |      | -1.3 |      | -1.7  | -1.7  | 1.7  | 1.7  | 2.6  | 2.6  |
| CLCN3   | chloride channel 3                                                                    |      |      |      |      | 1.4  |      | -3.0  | -3.0  | -1.3 |      | 3.5  | 3.5  |
| CLCN5   | chloride channel 5 (nephrolithiasis 2, X-linked, Dent disease)                        |      |      |      |      | 1.5  |      | -1.4  |       |      |      | -1.6 | -1.6 |
| CLCN7   | chloride channel 7                                                                    | 1.3  |      |      |      | 1.5  |      | 1.2   |       |      |      | -1.3 | -1.3 |

|         |                                                                                                    |      |      |  |      |      |      |      |      |      |      |      |       |       |
|---------|----------------------------------------------------------------------------------------------------|------|------|--|------|------|------|------|------|------|------|------|-------|-------|
| CLEC11A | C-type lectin domain family 11, member A                                                           |      |      |  | -1.3 |      |      |      | 1.5  | 1.5  | 1.4  | 1.4  | -10.9 | -10.9 |
| CLIC1   | chloride intracellular channel 1                                                                   |      |      |  |      |      |      |      | -1.3 | -1.3 | 1.3  | 1.3  |       |       |
| CLIC4   | chloride intracellular channel 4                                                                   | -1.4 |      |  | -1.2 |      | -1.4 |      | -2.2 | -2.2 | 1.4  |      | 2.0   | 2.0   |
| CLK1    | CDC-like kinase 1                                                                                  | 1.2  |      |  | 1.7  | 1.7  | 1.3  |      | 1.5  | 1.5  | 1.7  | 1.7  | 1.6   | 1.6   |
| CLK2    | CDC-like kinase 2                                                                                  |      |      |  |      |      |      |      |      |      |      |      |       |       |
| CLK3    | CDC-like kinase 3                                                                                  |      |      |  |      |      |      |      |      |      |      |      |       |       |
| CLN3    | ceroid-lipofuscinosis, neuronal 3, juvenile (Batten, Spielmeier-Vogt disease)                      |      |      |  |      |      |      |      |      |      |      |      | 1.6   |       |
| CLNS1A  | chloride channel, nucleotide-sensitive, 1A                                                         | -1.2 |      |  | -1.3 | -1.3 | -1.4 |      |      |      |      |      |       |       |
| CLOCK   | clock homolog (mouse)                                                                              |      |      |  |      |      | -1.3 |      | 1.2  |      | 2.0  |      | -1.4  | -1.4  |
| CLPP    | ClpP caseinolytic peptidase, ATP-dependent, proteolytic subunit homolog (E. coli)                  | 1.5  | 1.5  |  |      |      | 1.4  |      |      |      | -1.3 | -1.3 | -1.3  | -1.3  |
| CLPX    | ClpX caseinolytic peptidase X homolog (E. coli)                                                    | -1.2 |      |  |      |      | -1.3 |      |      |      |      |      |       |       |
| CLSTN1  | calsyntenin 1                                                                                      | 1.3  | 1.3  |  |      |      |      |      | 1.3  | 1.3  |      |      | -1.4  | -1.4  |
| CLTA    | clathrin, light chain (Lca)                                                                        |      |      |  |      |      |      |      | 1.4  | 1.4  | 1.4  |      | -1.3  | -1.3  |
| CLTB    | clathrin, light chain (Lcb)                                                                        | 1.3  |      |  |      |      | -1.4 |      | -2.0 | -2.0 | -1.4 | -1.4 | -1.3  | -1.3  |
| CLTC    | clathrin, heavy chain (Hc)                                                                         |      |      |  |      |      | -1.5 | -1.5 | 1.4  | 1.4  |      |      | -1.3  | -1.3  |
| CLU     | clusterin                                                                                          |      |      |  |      |      | 1.4  |      |      |      |      |      |       |       |
| CMA1    | chymase 1, mast cell                                                                               |      |      |  |      |      |      |      |      |      |      |      |       |       |
| CMAH    | cytidine monophosphate-N-acetylneuraminic acid hydroxylase (CMP-N-acetylneuraminate monooxygenase) |      |      |  |      |      | 1.7  |      |      |      | -1.4 | -1.4 | 1.6   |       |
| CNAP1   | non-SMC condensin I complex, subunit D2                                                            |      |      |  | 1.4  | 1.4  |      |      | -2.7 | -2.7 |      |      | 2.2   | 2.2   |
| CNIH    | cornichon homolog (Drosophila)                                                                     |      |      |  |      |      | -1.4 |      |      |      |      |      |       |       |
| CNKSR1  | connector enhancer of kinase suppressor of Ras 1                                                   |      |      |  |      |      |      |      |      |      |      |      |       |       |
| CNNM2   | cyclin M2                                                                                          |      |      |  | 1.4  |      |      |      | 1.7  | 1.7  |      |      | -1.5  |       |
| CNOT1   | CCR4-NOT transcription complex, subunit 1                                                          | 1.2  | 1.2  |  |      |      |      |      |      |      | -1.2 | -1.2 | -1.4  | -1.4  |
| CNOT4   | CCR4-NOT transcription complex, subunit 4                                                          |      |      |  |      |      |      |      | 1.5  | -1.3 | 1.4  | 1.4  | 1.4   |       |
| CNOT8   | CCR4-NOT transcription complex, subunit 8                                                          |      |      |  |      |      |      |      | -1.4 | -1.4 | 1.3  |      |       |       |
| CNP     | 2',3'-cyclic nucleotide 3' phosphodiesterase                                                       | -1.3 | -1.3 |  |      |      | 1.3  |      | -1.3 | -1.3 | -1.3 |      | -1.2  |       |
| CNTN1   | contactin 1                                                                                        |      |      |  |      |      | 1.3  |      | -1.5 |      | -1.2 |      |       |       |
| COASY   | Coenzyme A synthase                                                                                |      |      |  | 1.3  |      |      |      |      |      |      |      |       |       |
| COBRA1  | cofactor of BRCA1                                                                                  |      |      |  |      |      | 1.2  |      | -1.3 | -1.3 |      |      |       |       |
| COG2    | component of oligomeric golgi complex 2                                                            |      |      |  | -1.3 |      |      |      |      |      |      |      | -1.7  | -1.7  |
| COG4    | component of oligomeric golgi complex 4                                                            |      |      |  | 1.2  | 1.2  |      |      |      |      |      |      | 1.4   | 1.4   |
| COG5    | component of oligomeric golgi complex 5                                                            |      |      |  |      |      |      |      | 2.0  | 1.3  | -1.3 | -1.3 | -1.4  |       |
| COIL    | coilin                                                                                             |      |      |  | -1.2 |      | 1.3  |      | 1.2  |      |      |      | -2.0  | -2.0  |
| COL6A1  | collagen, type VI, alpha 1                                                                         |      |      |  | 1.5  |      |      |      |      |      | 2.1  | 2.1  |       |       |
| COL8A1  | collagen, type VIII, alpha 1                                                                       | -1.4 |      |  |      |      |      |      |      |      | 1.3  |      |       |       |
| COMMD4  | COMM domain containing 4                                                                           | 1.2  |      |  |      |      |      |      |      |      |      |      | -1.5  | -1.5  |
| COMT    | catechol-O-methyltransferase                                                                       | -1.4 |      |  | -1.7 | -1.7 | -1.4 |      | -2.1 | -2.1 | -1.4 |      | 1.9   |       |
| COPA    | coatamer protein complex, subunit alpha                                                            | 1.2  |      |  | 1.4  | 1.4  |      |      | 1.2  | 1.2  |      |      | 1.9   | 1.9   |
| COPB    | coatamer protein complex, subunit beta 1                                                           |      |      |  |      |      |      |      | 1.4  | 1.4  |      |      |       |       |
| COPB2   | coatamer protein complex, subunit beta 2 (beta prime)                                              |      |      |  | 1.2  |      |      |      | 1.2  | 1.2  |      |      | 1.2   |       |
| COPE    | coatamer protein complex, subunit epsilon                                                          |      |      |  |      |      |      |      |      |      |      |      |       |       |
| COPS2   | COP9 constitutive photomorphogenic homolog subunit 2 (Arabidopsis)                                 | -1.2 |      |  | 1.6  |      | -1.3 |      | 1.6  | 1.6  | -1.2 | -1.2 | -2.4  | -2.4  |
| COPS3   | COP9 constitutive photomorphogenic homolog subunit 3 (Arabidopsis)                                 |      |      |  |      |      | -1.2 |      | -2.0 | -2.0 | -1.2 | -1.2 |       |       |
| COPS5   | COP9 constitutive photomorphogenic homolog subunit 5 (Arabidopsis)                                 |      |      |  |      |      | -1.3 |      |      |      |      |      |       |       |
| COPS6   | COP9 constitutive photomorphogenic homolog subunit 6 (Arabidopsis)                                 | -1.2 |      |  |      |      |      |      | -1.7 | -1.7 | -1.5 | -1.5 | -1.8  | -1.8  |
| COPS7A  | COP9 constitutive photomorphogenic homolog subunit 7A (Arabidopsis)                                |      |      |  |      |      |      |      | -1.4 | -1.4 |      |      | 1.3   | 1.3   |
| COPS8   | COP9 constitutive photomorphogenic homolog subunit 8 (Arabidopsis)                                 |      |      |  |      |      | -1.4 |      | -3.2 | -3.2 | 1.3  |      | 2.6   | 2.6   |
| COQ7    | coenzyme Q7 homolog, ubiquinone (yeast)                                                            | -1.3 |      |  | 1.2  |      | -1.3 |      |      |      |      |      | 1.8   |       |
| CORO1A  | coronin, actin binding protein, 1A                                                                 | 1.3  |      |  |      |      | 1.3  |      | -1.4 |      | -1.7 | -1.7 |       |       |
| CORO2A  | coronin, actin binding protein, 2A                                                                 | 1.3  |      |  |      |      |      |      |      |      |      |      |       |       |
| CORT    | cortistatin                                                                                        |      |      |  |      |      |      |      |      |      |      |      |       |       |
| COVA1   | cytosolic ovarian carcinoma antigen 1                                                              |      |      |  | 1.3  |      | 1.2  |      |      |      | 1.8  | 1.8  | 1.8   |       |
| COX11   | COX11 homolog, cytochrome c oxidase assembly protein (yeast)                                       |      |      |  |      |      | -1.5 |      | 4.1  | 4.1  | -1.4 | -1.3 | -2.9  | -2.9  |
| COX17   | COX17 cytochrome c oxidase assembly homolog (S. cerevisiae)                                        |      |      |  |      |      | -1.5 |      |      |      | 1.6  | 1.6  |       |       |
| COX411  | cytochrome c oxidase subunit IV isoform 1                                                          |      |      |  |      |      |      |      |      |      |      |      |       |       |
| COX5A   | cytochrome c oxidase subunit Va                                                                    |      |      |  | -1.2 |      | -1.2 |      |      |      |      |      | -1.6  | -1.6  |
| COX5B   | cytochrome c oxidase subunit Vb                                                                    |      |      |  |      |      |      |      |      |      | -1.2 | -1.2 | -1.6  | -1.6  |
| COX6A1  | cytochrome c oxidase subunit VIa polypeptide 1                                                     |      |      |  |      |      |      |      | -1.2 | -1.2 |      |      |       |       |



|          |                                                                                        |      |      |      |      |      |      |      |       |       |      |      |       |       |
|----------|----------------------------------------------------------------------------------------|------|------|------|------|------|------|------|-------|-------|------|------|-------|-------|
| CSTF1    | cleavage stimulation factor, 3' pre-RNA, subunit 1, 50kDa                              |      |      |      | 1.2  |      | -1.3 |      | 1.6   | 1.6   | 1.3  | 1.3  | -1.7  | -1.7  |
| CSTF2    | cleavage stimulation factor, 3' pre-RNA, subunit 2, 64kDa                              |      |      |      |      |      |      |      |       |       |      |      |       |       |
| CSTF3    | cleavage stimulation factor, 3' pre-RNA, subunit 3, 77kDa                              |      |      |      |      |      |      |      | 2.2   | 2.2   | -1.3 |      | -4.0  | -4.0  |
| CTAGE5   | CTAGE family, member 5                                                                 |      |      |      | 1.2  |      |      |      |       |       | 1.5  |      | 1.3   |       |
| CTBP1    | C-terminal binding protein 1                                                           | 1.3  | 1.3  | 1.4  | 1.4  | 1.3  | 1.3  | -1.5 | -1.5  | 1.3   | 1.3  |      | 2.2   | 2.2   |
| CTCF     | CCCTC-binding factor (zinc finger protein)                                             | -1.2 |      |      |      |      |      | -1.2 | -1.2  |       |      |      |       |       |
| CTDP1    | CTD (carboxy-terminal domain, RNA polymerase II, polypeptide A) phosphatase, subunit 1 |      |      |      |      |      | -1.4 |      | -1.3  |       |      |      |       |       |
| CTDSP2   | CTD (carboxy-terminal domain, RNA polymerase II, polypeptide A) small phosphatase 2    | 1.4  | 1.4  | 1.5  | 1.5  | 1.6  |      | 1.9  | 1.9   | -1.3  | -1.3 | -1.3 | -1.3  | -1.2  |
| CTNNA1   | catenin (cadherin-associated protein), alpha 1, 102kDa                                 | 1.3  | 1.3  | 1.6  | 1.6  | -1.3 |      |      |       | 1.7   | 1.7  | 1.7  | 1.7   | 1.7   |
| CTNNAL1  | catenin (cadherin-associated protein), alpha-like 1                                    |      |      |      | 1.2  |      | -1.3 | -1.3 | -2.0  | -2.0  |      |      |       |       |
| CTNNB1   | catenin (cadherin-associated protein), beta 1, 88kDa                                   |      |      |      |      |      |      | 1.4  | 1.4   | 1.4   | 1.4  | 1.4  | 2.5   | 2.5   |
| CTPS     | CTP synthase                                                                           | -1.7 |      | -2.5 |      |      | -1.8 | -1.5 | -1.5  | -1.4  | -1.4 | -1.4 | -2.4  | -2.4  |
| CTR9     | Ctr9, Paf1/RNA polymerase II complex component, homolog (S. cerevisiae)                |      |      | 1.2  |      |      |      | 1.4  | 1.4   | -1.3  |      |      | -1.9  | -1.9  |
| CTSB     | cathepsin B                                                                            | 1.2  |      |      |      |      |      | 1.9  | 1.6   | 2.1   | 2.1  | 2.1  | 2.4   | 2.4   |
| CTSC     | cathepsin C                                                                            |      |      |      |      |      |      |      |       |       |      |      |       |       |
| CTSC     | --                                                                                     | -1.5 | -1.5 | -1.3 | -1.3 | -1.4 |      | 2.7  | 2.7   | -5.2  | -5.2 | -5.2 | -7.0  | -7.0  |
| CTSD     | cathepsin D                                                                            | 1.2  |      |      |      | 1.2  |      | 2.0  |       |       |      |      |       |       |
| CTSH     | cathepsin H                                                                            |      |      |      |      |      |      | -1.4 | -1.4  |       |      |      |       |       |
| CTSW     | cathepsin W                                                                            |      |      |      |      |      |      |      |       |       |      |      |       |       |
| CUGBP1   | CUG triplet repeat, RNA binding protein 1                                              |      |      |      |      |      |      | -1.8 | -1.8  | -1.3  | -1.3 | -1.4 | -1.4  | -1.4  |
| CUGBP2   | CUG triplet repeat, RNA binding protein 2                                              | 2.1  | 2.0  | 2.2  | 2.2  | 1.8  | 1.8  | 5.7  | 5.7   | 2.4   | 2.4  | 2.4  | 2.0   | 1.7   |
| CUL1     | cullin 1                                                                               | 1.7  | 1.7  | 1.6  | 1.6  | 1.2  |      | -1.3 | -1.3  |       |      |      | 2.0   |       |
| CUL2     | cullin 2                                                                               |      |      |      |      |      |      | 3.6  | 3.6   | 1.3   |      |      | -3.9  | -3.9  |
| CUL4A    | cullin 4A                                                                              | 1.2  |      |      |      |      | -1.4 | 1.5  | 1.5   | 1.4   | 1.4  |      | -1.5  | -1.5  |
| CUL4B    | cullin 4B                                                                              |      |      |      |      |      |      |      |       |       |      |      | 2.8   | 2.8   |
| CUL5     | cullin 5                                                                               |      |      |      |      |      | 1.3  | 1.4  | 1.4   |       |      |      | 1.3   |       |
| CUL7     | cullin 7                                                                               |      |      |      | -1.3 |      |      |      |       |       |      |      | 1.6   | 1.6   |
| CUTL1    | cut-like 1, CCAAT displacement protein (Drosophila)                                    |      |      |      | 1.4  | 1.4  | 1.5  | -1.7 | -1.5  | 1.7   | 1.7  | 1.7  | 1.9   | 1.9   |
| CXCR4    | chemokine (C-X-C motif) receptor 4                                                     | 1.3  | 1.3  | 1.3  | 1.3  | 1.5  | 1.5  | -2.5 | -2.5  | 1.8   | 1.8  | 1.8  | 63.4  | 63.4  |
| CXORF40A | chromosome X open reading frame 40A                                                    |      |      |      |      |      | -1.4 | -1.2 | -1.2  |       |      |      |       |       |
| CYB5     | cytochrome b5 type A (microsomal)                                                      |      |      |      | 1.3  |      | 1.7  | -1.3 | -1.3  | 2.3   | 2.3  |      | -1.5  | -1.5  |
| CYB5-M   | cytochrome b5 type B (outer mitochondrial membrane)                                    |      |      |      |      |      | -1.4 | -1.4 | -1.4  |       |      |      |       |       |
| CYBA     | cytochrome b-245, alpha polypeptide                                                    |      |      |      |      |      |      |      |       | 1.6   | 1.6  |      |       |       |
| CYC1     | cytochrome c-1                                                                         | -1.3 | -1.3 | -1.3 | -1.3 | -1.5 |      | 1.5  | 1.5   | -1.6  | -1.6 | -1.6 | -4.4  | -4.4  |
| CYCS     | cytochrome c, somatic                                                                  | -1.6 | -1.6 | -1.6 | -1.6 | -1.9 | -1.9 | 4.9  | 4.9   | -1.6  | -1.6 | -1.6 | -13.5 | -13.5 |
| CYFIP1   | cytoplasmic FMR1 interacting protein 1                                                 |      |      |      |      |      |      | -2.0 | -2.0  | 2.3   | 2.3  | 2.3  | 2.9   | 2.9   |
| CYFIP2   | cytoplasmic FMR1 interacting protein 2                                                 |      |      |      | -1.5 | -1.5 | -1.3 | -1.3 | -44.2 | -44.2 | -2.8 | -2.8 | 50.3  | 50.3  |
| CYLD     | cylindromatosis (turban tumor syndrome)                                                |      |      |      | 1.4  |      |      | 2.9  |       | -1.4  |      |      | -1.9  | -1.9  |
| CYP11A1  | cytochrome P450, family 11, subfamily A, polypeptide 1                                 | 1.2  |      |      |      | 1.6  |      |      |       |       |      |      |       |       |
| CYP2E1   | cytochrome P450, family 2, subfamily E, polypeptide 1                                  |      |      |      |      |      |      | -1.4 |       | -2.0  |      |      |       |       |
| CYP51A1  | cytochrome P450, family 51, subfamily A, polypeptide 1                                 | -1.4 |      |      |      |      | -1.4 | -1.4 | 1.3   | 1.3   | 1.3  |      | -2.1  | -2.1  |
| D4S234E  | DNA segment on chromosome 4 (unique) 234 expressed sequence                            | 1.3  |      |      |      |      |      |      |       |       |      | -1.5 |       |       |
| DAAM1    | dishevelled associated activator of morphogenesis 1                                    |      |      |      | 1.2  |      | -1.5 | -3.4 | -3.4  | 1.7   | 1.7  |      | 8.5   | 8.5   |
| DAB2     | disabled homolog 2, mitogen-responsive phosphoprotein (Drosophila)                     |      |      |      |      |      | -1.7 | 50.8 | 50.8  | -2.4  | -2.4 | -2.4 | -32.6 | -32.6 |
| DACH1    | dachshund homolog 1 (Drosophila)                                                       |      |      |      |      |      | 1.2  | 8.1  | 8.1   |       |      |      | -7.6  | -7.6  |
| DAD1     | defender against cell death 1                                                          |      |      |      |      |      |      | -4.1 | -4.1  |       |      |      | 2.7   | 2.7   |
| DAG1     | dystroglycan 1 (dystrophin-associated glycoprotein 1)                                  |      |      |      |      |      |      | 1.5  | 1.5   |       |      |      |       |       |
| DAP      | death-associated protein                                                               |      |      |      | 1.2  |      |      |      |       |       |      |      |       |       |
| DAP3     | death associated protein 3                                                             | -1.4 | -1.4 | -1.2 |      |      | -1.6 | 1.9  | 1.9   |       |      |      | -1.7  | -1.7  |
| DAPK1    | death-associated protein kinase 1                                                      |      |      |      |      |      | -1.3 | 3.4  | 3.4   |       |      |      | -4.0  | -4.0  |
| DAPK3    | death-associated protein kinase 3                                                      | 1.2  | 1.2  |      |      |      |      | -1.6 | 1.5   | -1.3  | -1.3 | -1.3 | -1.8  | -1.8  |
| DARS     | aspartyl-tRNA synthetase                                                               |      |      |      | -1.2 |      | -1.4 | 1.3  | 1.3   | 1.2   | 1.2  |      | -1.5  | -1.5  |
| DATF1    | death inducer-obliterater 1                                                            |      |      |      | 1.4  |      |      | 1.3  | 1.3   | 1.5   | 1.5  | 1.5  | 1.8   | 1.8   |
| DAXX     | death-associated protein 6                                                             |      |      |      | -1.2 |      | -1.2 |      |       |       |      |      |       |       |
| DAZAP2   | DAZ associated protein 2                                                               | 1.2  |      |      |      |      |      | -1.7 | -1.7  | -1.3  |      |      | 1.7   | 1.7   |
| DBI      | diazepam binding inhibitor (GABA receptor modulator, acyl-Coenzyme A binding protein)  |      |      |      | -1.3 | -1.3 | -1.3 | -1.9 | -1.9  | -1.4  |      |      | 1.5   | 1.5   |
| DBN1     | drebrin 1                                                                              | -1.5 | -1.5 | -1.8 | -1.8 | -1.2 |      | -1.5 | -1.5  |       |      |      | -1.3  |       |
| DCK      | deoxycytidine kinase                                                                   |      |      |      | 1.4  | 1.4  |      | -1.9 | -1.9  | 1.3   | 1.3  | 1.3  | 2.4   | 2.4   |



|         |                                                                                                               |      |      |      |      |      |       |       |      |      |       |       |
|---------|---------------------------------------------------------------------------------------------------------------|------|------|------|------|------|-------|-------|------|------|-------|-------|
| DLAT    | dihydropyrimidine S-acetyltransferase (E2 component of pyruvate dehydrogenase complex)                        | -1.3 |      |      |      | -1.5 | -1.6  | -1.6  | -2.1 | -2.1 | -2.2  | -2.2  |
| DLD     | dihydropyrimidine dehydrogenase                                                                               |      |      |      |      | -1.2 | -1.3  | -1.3  | -1.3 | -1.3 |       |       |
| DLEU1   | deleted in lymphocytic leukemia, 1                                                                            | -1.4 |      | -1.6 | -1.6 |      | 1.5   | 1.5   | -1.8 | -1.8 | -2.0  | -2.0  |
| DLEU2   | deleted in lymphocytic leukemia, 2                                                                            |      |      |      |      |      |       |       |      |      |       |       |
| DLG1    | discs, large homolog 1 (Drosophila)                                                                           | -1.3 |      |      |      | 1.3  | -1.5  | -1.5  | -1.9 | -1.9 | 1.8   | 1.8   |
| DLG5    | discs, large homolog 5 (Drosophila)                                                                           |      |      |      |      | 1.3  | 1.3   | 2.2   | 2.2  | 2.0  | 2.0   | 3.1   |
| DLG7    | discs, large homolog 7 (Drosophila)                                                                           |      |      | 1.4  |      |      | -1.3  | -1.3  |      |      | 1.8   | 1.8   |
| DLGAP1  | discs, large (Drosophila) homolog-associated protein 1                                                        |      |      |      |      |      | 1.2   |       | -1.3 |      | -1.2  |       |
| DLST    | dihydropyrimidine S-succinyltransferase (E2 component of 2-oxo-glutarate complex)                             |      |      |      |      |      | -1.2  |       |      |      | 1.5   | 1.5   |
| DMPK    | dystrophia myotonica-protein kinase                                                                           | 1.3  |      | 1.4  |      |      |       |       |      |      | -1.2  |       |
| DMTF1   | cyclin D binding myb-like transcription factor 1                                                              |      |      |      |      |      | -1.3  |       | 1.3  |      | 1.8   | 1.8   |
| DMWD    | dystrophia myotonica-containing WD repeat motif                                                               |      |      | 1.3  |      | 1.4  |       |       |      |      | -1.5  | -1.5  |
| DMXL1   | Dmx-like 1                                                                                                    | 1.4  |      |      |      |      | 2.2   | 2.2   | -2.7 | 1.8  | 1.6   | 1.6   |
| DMXL2   | Dmx-like 2                                                                                                    | 1.6  | 1.6  |      |      | -1.3 | 1.7   | 1.7   | -1.4 |      | -1.2  | -1.2  |
| DNAJA1  | DnaJ (Hsp40) homolog, subfamily A, member 1                                                                   | -1.3 | -1.3 |      |      | -1.7 | -1.7  | -1.7  | -1.7 | -1.4 | -1.4  |       |
| DNAJA2  | DnaJ (Hsp40) homolog, subfamily A, member 2                                                                   |      |      | -1.2 |      | -1.4 | 15.8  | 15.8  | 1.2  |      | -25.2 | -25.2 |
| DNAJB1  | DnaJ (Hsp40) homolog, subfamily B, member 1                                                                   |      |      |      |      | -1.4 | -1.9  | -1.9  | 1.4  |      | 1.5   | 1.5   |
| DNAJB6  | DnaJ (Hsp40) homolog, subfamily B, member 6                                                                   |      |      |      |      | -1.3 | -1.7  | -1.7  | 1.3  |      | 2.0   | 2.0   |
| DNAJC11 | DnaJ (Hsp40) homolog, subfamily C, member 11                                                                  | -1.2 | -1.2 | -1.4 | -1.4 |      | 1.4   | 1.4   | 1.9  | 1.9  | -1.8  | -1.8  |
| DNAJC13 | DnaJ (Hsp40) homolog, subfamily C, member 13                                                                  |      |      |      |      |      | 2.0   | 2.0   |      |      | -1.7  |       |
| DNAJC3  | DnaJ (Hsp40) homolog, subfamily C, member 3                                                                   |      |      | 1.6  |      |      | 1.7   | 1.7   |      |      |       |       |
| DNAJC7  | DnaJ (Hsp40) homolog, subfamily C, member 7                                                                   |      |      |      |      |      | 1.3   | 1.3   | -1.4 | -1.4 | -1.6  | -1.6  |
| DNCH1   | dynein, cytoplasmic 1, heavy chain 1                                                                          | 1.3  |      |      |      |      |       |       | 4.0  | 4.0  | 1.8   | 1.8   |
| DNCL1   | dynein, light chain, LC8-type 1                                                                               |      |      |      |      |      |       |       |      |      |       |       |
| DNM1    | dynamitin 1                                                                                                   |      |      |      |      | 1.3  |       |       |      |      |       |       |
| DNM1L   | dynamitin 1-like                                                                                              |      |      |      |      |      | 1.5   |       |      |      | -1.7  | 1.2   |
| DNM2    | dynamitin 2                                                                                                   |      |      |      |      | 1.3  | 1.3   |       |      |      | 1.3   |       |
| DNMT1   | DNA (cytosine-5)-methyltransferase 1                                                                          |      |      |      |      |      |       |       | -1.4 | -1.4 | -2.8  | -2.8  |
| DNPEP   | aspartyl aminopeptidase                                                                                       | -1.2 | -1.2 | -1.3 | -1.3 | -1.4 | -4.5  | -4.5  | -1.6 | -1.6 | 1.6   | 1.6   |
| DOC-1R  | CDK2-associated protein 2                                                                                     |      |      |      |      |      | -2.0  | -2.0  | 2.0  | 2.0  | 2.5   | 2.5   |
| DOCK2   | dedicator of cytokinesis 2                                                                                    |      |      |      |      |      | 1.8   | 1.8   |      |      | -2.8  | -2.8  |
| DOCK9   | dedicator of cytokinesis 9                                                                                    |      |      | -1.3 |      | -1.5 |       |       | 5.7  | 5.7  |       |       |
| DOK1    | docking protein 1, 62kDa (downstream of tyrosine kinase 1)                                                    |      |      | 1.7  | 1.7  | 1.3  | 2.3   | 2.3   |      |      | -2.3  | -2.3  |
| DPAGT1  | dolichyl-phosphate (UDP-N-acetylglucosamine) N-acetylglucosaminophosphotransferase 1 (GlcNAc-1-P transferase) |      |      |      |      |      |       |       | -1.8 | -1.8 | -1.6  | -1.6  |
| DPEP1   | dipeptidase 1 (renal)                                                                                         | 1.9  | 1.9  |      |      | 4.0  | 4.0   |       | 13.0 | 13.0 | 15.1  | 15.1  |
| DPF2    | D4, zinc and double PHD fingers family 2                                                                      |      |      |      |      | 1.5  |       |       | 1.3  |      |       |       |
| DPH2L1  | DPH1 homolog (S. cerevisiae)                                                                                  |      |      |      |      | -1.3 | -1.7  | -1.7  |      |      | 1.6   | 1.6   |
| DPM1    | dolichyl-phosphate mannosyltransferase polypeptide 1, catalytic subunit                                       |      |      |      |      | -1.2 |       |       |      |      | -1.4  | -1.4  |
| DPM2    | dolichyl-phosphate mannosyltransferase polypeptide 2, regulatory subunit                                      |      |      |      |      |      | -1.2  |       |      |      | -1.5  | -1.5  |
| DPT     | dermatopontin                                                                                                 |      |      | 1.2  |      | 1.3  | -22.5 | -22.5 |      |      | 2.9   |       |
| DPYD    | dihydropyrimidine dehydrogenase                                                                               | 1.2  |      |      |      | -1.3 | -8.8  | -8.8  |      |      | 7.7   | 7.7   |
| DPYSL2  | dihydropyrimidine-like 2                                                                                      |      |      | 1.3  |      | -1.3 | -4.2  | -4.2  | 3.1  | 3.1  | 3.7   | 3.7   |
| DR1     | down-regulator of transcription 1, TBP-binding (negative cofactor 2)                                          |      |      | 1.8  | 1.6  |      | -1.6  | -1.6  | 1.2  |      |       |       |
| DRAP1   | DR1-associated protein 1 (negative cofactor 2 alpha)                                                          |      |      |      |      | -1.2 | -1.5  | -1.5  | -2.2 | -2.2 |       |       |
| DRG1    | developmentally regulated GTP binding protein 1                                                               |      |      |      |      | -1.5 | -1.5  |       | -1.4 | -1.4 | -1.6  | -1.6  |
| DSCR1   | Down syndrome critical region gene 1                                                                          | 5.0  | 5.0  | 8.2  | 8.2  | 4.8  | 4.8   | 1.6   | 1.5  | 7.7  | 7.9   | 7.9   |
| DSG2    | desmoglein 2                                                                                                  |      |      |      |      | -1.3 |       | 86.2  | 86.2 | -1.9 | -43.8 | -43.8 |
| DST     | dystonin                                                                                                      |      |      | 1.5  |      | -1.2 | -8.3  | -8.3  |      |      | 15.8  | 15.8  |
| DSTN    | destrin (actin depolymerizing factor)                                                                         |      |      | 1.7  | 1.7  |      | 3.9   | 3.9   |      |      | 1.2   |       |
| DTX4    | deltex 4 homolog (Drosophila)                                                                                 |      |      |      |      |      | -2.2  | -2.2  |      |      | 3.3   | 3.3   |
| DTYMK   | deoxythymidylate kinase (thymidylate kinase)                                                                  |      |      | -1.7 |      | -1.3 | -1.9  | -1.9  | -1.3 |      | 1.4   | 1.2   |
| DULLARD | dullard homolog (Xenopus laevis)                                                                              |      |      |      |      | -1.2 | -1.4  | -1.4  | 1.8  | 1.8  | 1.4   | 1.4   |
| DUSP10  | dual specificity phosphatase 10                                                                               | 2.7  | 2.7  | 7.3  | 7.3  | 1.4  | -1.4  | -1.4  |      |      | 1.9   | 1.9   |
| DUSP11  | dual specificity phosphatase 11 (RNA/RNP complex 1-interacting)                                               |      |      |      |      |      |       |       | -1.3 | -1.3 | 1.4   | 1.4   |
| DUSP14  | dual specificity phosphatase 14                                                                               |      |      |      |      | -1.3 |       |       | -1.3 |      | -1.6  | -1.6  |
| DUSP3   | dual specificity phosphatase 3 (vaccinia virus phosphatase VH1-related)                                       |      |      | -1.6 |      | -1.6 | 6.4   | 6.4   |      |      | -17.5 | -17.5 |
| DUSP6   | dual specificity phosphatase 6                                                                                | 1.4  |      | 1.8  | 1.8  |      | 15.8  | 15.8  | 1.7  | 1.7  | -28.2 | -28.2 |

|          |                                                                                        |  |      |      |      |      |      |      |      |      |      |      |      |
|----------|----------------------------------------------------------------------------------------|--|------|------|------|------|------|------|------|------|------|------|------|
| DUSP7    | dual specificity phosphatase 7                                                         |  | -2.0 |      | -1.6 |      | -2.0 | -2.0 |      | -1.2 | -1.2 | -1.4 | -1.4 |
| DUT      | dUTP pyrophosphatase                                                                   |  |      |      |      |      |      |      |      | -2.0 | -2.0 | -3.9 | -3.9 |
| DVL3     | dishevelled, dsh homolog 3 (Drosophila)                                                |  | 1.6  |      | 1.3  |      |      | -1.6 | -1.6 |      |      | 1.9  | 1.9  |
| DXYS155E | chromosome X and Y open reading frame 3                                                |  | 1.2  |      |      | 1.3  |      | -1.4 |      |      |      | 1.8  | 1.8  |
| DYRK1A   | dual-specificity tyrosine-(Y)-phosphorylation regulated kinase 1A                      |  |      |      | 1.3  |      |      |      |      | -1.6 | -1.6 | -1.2 | -1.2 |
| DYRK2    | dual-specificity tyrosine-(Y)-phosphorylation regulated kinase 2                       |  |      |      |      |      |      | -1.5 |      | 1.2  |      | -1.4 | -1.4 |
| DYRK3    | dual-specificity tyrosine-(Y)-phosphorylation regulated kinase 3                       |  |      |      | 1.2  |      | -1.5 | -1.5 |      |      |      |      |      |
| DZIP3    | zinc finger DAZ interacting protein 3                                                  |  |      |      |      | 1.4  |      | -1.3 | -1.3 | 1.2  |      | 2.5  | 2.5  |
| E2F1     | E2F transcription factor 1                                                             |  |      |      | -1.3 |      | -1.2 | -1.2 | -1.7 | -1.7 | -1.5 | -2.7 | -2.7 |
| E2F3     | E2F transcription factor 3                                                             |  | 1.5  |      | 1.6  |      |      | 1.4  |      | 1.6  | 1.6  |      |      |
| E2F4     | E2F transcription factor 4, p107/p130-binding                                          |  |      |      |      |      |      |      |      |      |      |      |      |
| E2F5     | E2F transcription factor 5, p130-binding                                               |  | -1.6 | -1.6 | -1.9 | -1.9 | -1.7 |      |      | -1.8 |      | -3.5 | -3.5 |
| E2F6     | E2F transcription factor 6                                                             |  |      |      | -1.2 |      | -1.3 |      |      | -1.3 | -1.3 | -2.4 | -2.4 |
| EBAG9    | estrogen receptor binding site associated, antigen, 9                                  |  |      |      |      |      |      | -1.8 | -1.8 |      |      | 2.5  | 2.5  |
| EBNA1BP2 | EBNA1 binding protein 2                                                                |  | -1.5 | -1.5 | -1.9 | -1.9 | -2.0 |      |      | -1.8 | -1.8 | -2.6 | -2.6 |
| EBP      | emopamil binding protein (sterol isomerase)                                            |  | -1.2 | -1.2 | -1.5 | -1.5 |      |      | -2.1 | -2.1 | -1.5 | 1.4  | 1.4  |
| ECE1     | endothelin converting enzyme 1                                                         |  | 1.3  |      |      |      |      | 1.6  |      |      |      | -1.7 | -1.7 |
| ECH1     | enoyl Coenzyme A hydratase 1, peroxisomal                                              |  |      |      |      |      |      |      |      |      |      | -1.6 | -1.6 |
| ECHS1    | enoyl Coenzyme A hydratase, short chain, 1, mitochondrial                              |  |      |      | -1.4 | -1.4 | -1.3 |      |      |      | -1.4 | -1.4 | -1.6 |
| EDD1     | E3 ubiquitin protein ligase, HECT domain containing, 1                                 |  | 1.3  | 1.3  | 1.2  |      | -1.4 | -1.4 | -1.4 | -1.4 | 1.4  | 1.9  | 1.9  |
| EDEM1    | ER degradation enhancer, mannosidase alpha-like 1                                      |  | -1.2 |      |      |      |      | -1.6 | -1.5 | -1.2 | -1.2 | 1.4  | 1.4  |
| EDG6     | endothelial differentiation, lysophosphatidic acid G-protein-coupled receptor, 6       |  |      |      |      |      | 1.4  |      |      | 1.8  | 1.8  | -1.2 | -1.2 |
| EED      | embryonic ectoderm development                                                         |  |      |      |      |      | -1.4 |      | -1.9 | -1.9 |      | 1.2  | 1.2  |
| EEF1A1   | eukaryotic translation elongation factor 1 alpha 1                                     |  |      |      | -1.6 |      | 1.3  |      | 4.9  | 4.9  |      | -5.1 | -5.1 |
| EEF1A2   | eukaryotic translation elongation factor 1 alpha 2                                     |  |      |      |      |      |      |      |      |      |      |      |      |
| EEF1B2   | eukaryotic translation elongation factor 1 beta 2                                      |  |      |      |      |      | -1.2 |      |      |      |      |      |      |
| EEF1D    | eukaryotic translation elongation factor 1 delta (guanine nucleotide exchange protein) |  |      |      |      |      | -1.2 |      | 1.6  | 1.6  | 1.2  | -1.3 | -1.3 |
| EEF1E1   | eukaryotic translation elongation factor 1 epsilon 1                                   |  | -1.7 | -1.7 | -2.1 | -2.1 | -2.3 |      | -1.6 | -1.6 | -3.3 | -3.3 | -2.4 |
| EEF1G    | eukaryotic translation elongation factor 1 gamma                                       |  |      |      |      |      |      |      | -1.4 |      | -1.5 | 1.3  | 1.3  |
| EEF2     | eukaryotic translation elongation factor 2                                             |  |      |      |      |      |      |      | 1.3  | 1.3  |      |      |      |
| EFNA3    | ephrin-A3                                                                              |  |      |      |      |      | 2.2  |      |      |      |      |      |      |
| EFNB2    | ephrin-B2                                                                              |  |      |      |      |      |      |      | -5.9 | -5.9 | -2.8 | -2.8 | 5.8  |
| EHBP1    | EH domain binding protein 1                                                            |  |      |      |      |      |      | 1.8  | 1.4  | 1.2  |      | -2.6 | -2.6 |
| EHD1     | EH-domain containing 1                                                                 |  |      |      | -1.2 | -1.2 |      | 1.6  | 1.6  |      |      | -1.4 | -1.4 |
| EI24     | etoposide induced 2.4 mRNA                                                             |  |      |      | -1.3 |      |      | 1.3  | 1.3  | -1.5 | -1.5 | -2.1 | -2.1 |
| EIF1     | eukaryotic translation initiation factor 1                                             |  | -1.4 | -1.4 | -1.4 | -1.4 | -1.7 | -1.7 |      |      |      | 1.3  | 1.3  |
| EIF1AX   | eukaryotic translation initiation factor 1A, X-linked                                  |  |      |      | -1.6 |      | -1.4 |      | -2.2 | -2.2 | -1.5 | -1.5 | -2.8 |
| EIF2A    | eukaryotic translation initiation factor 2A, 65kDa                                     |  | 1.2  |      |      |      |      | 1.3  | 1.3  |      |      | 1.2  | 1.2  |
| EIF2AK2  | eukaryotic translation initiation factor 2-alpha kinase 2                              |  | -1.3 |      |      |      |      | -1.2 |      | -1.5 | -1.5 |      |      |
| EIF2B2   | eukaryotic translation initiation factor 2B, subunit 2 beta, 39kDa                     |  |      |      |      |      | -1.2 |      |      |      |      | -1.2 | -1.2 |
| EIF2B4   | eukaryotic translation initiation factor 2B, subunit 4 delta, 67kDa                    |  |      |      |      |      |      |      |      |      |      | -1.4 | -1.4 |
| EIF2B5   | eukaryotic translation initiation factor 2B, subunit 5 epsilon, 82kDa                  |  |      |      |      |      |      |      |      | -1.2 |      | -1.5 | -1.5 |
| EIF2C2   | eukaryotic translation initiation factor 2C, 2                                         |  | -2.1 |      |      |      | -1.9 |      | 2.6  | 2.6  | -1.6 | -1.6 | -4.3 |
| EIF2S1   | eukaryotic translation initiation factor 2, subunit 1 alpha, 35kDa                     |  | -1.4 | -1.4 | -1.2 |      | -1.4 | -1.4 | -1.2 | -1.2 | -1.6 | -1.6 | -1.8 |
| EIF2S2   | eukaryotic translation initiation factor 2, subunit 2 beta, 38kDa                      |  | -1.3 |      |      |      |      |      |      |      |      | -1.6 | -1.6 |
| EIF2S3   | eukaryotic translation initiation factor 2, subunit 3 gamma, 52kDa                     |  |      |      | 1.7  |      |      | 1.3  | 1.3  |      |      |      |      |
| EIF3S10  | eukaryotic translation initiation factor 3, subunit 10 theta, 150/170kDa               |  | -1.4 |      |      |      | -1.7 | -1.7 | 3.9  | 3.9  | -1.3 | -1.3 | -5.4 |
| EIF3S12  | eukaryotic translation initiation factor 3, subunit 12                                 |  |      |      | -1.3 |      | -1.2 |      | -1.3 |      | -1.5 | -1.3 | -1.2 |
| EIF3S2   | eukaryotic translation initiation factor 3, subunit 2 beta, 36kDa                      |  |      |      |      |      | -1.5 | -1.5 |      | -1.6 | -1.6 | -1.6 | -1.6 |
| EIF3S3   | eukaryotic translation initiation factor 3, subunit 3 gamma, 40kDa                     |  |      |      |      |      | -1.2 |      |      |      |      | 1.4  | 1.4  |
| EIF3S4   | eukaryotic translation initiation factor 3, subunit 4 delta, 44kDa                     |  |      |      |      |      |      |      |      |      |      |      |      |
| EIF3S5   | eukaryotic translation initiation factor 3, subunit 5 epsilon, 47kDa                   |  |      |      | 1.3  | 1.3  |      |      |      | 1.2  | 1.2  | 1.3  | 1.3  |
| EIF3S6   | eukaryotic translation initiation factor 3, subunit 6 48kDa                            |  |      |      |      |      | -1.2 |      | -1.5 | -1.5 | -1.6 | -1.6 | 1.2  |
| EIF3S7   | eukaryotic translation initiation factor 3, subunit 7 zeta, 66/67kDa                   |  | -1.2 |      |      |      | -1.6 |      | 1.3  | 1.3  |      | -1.3 | -1.3 |
| EIF3S8   | eukaryotic translation initiation factor 3, subunit 8, 110kDa                          |  | -1.2 | -1.2 |      |      | -1.2 |      | -3.1 | -3.1 | -1.6 | -1.4 | 3.4  |
| EIF3S9   | eukaryotic translation initiation factor 3, subunit 9 eta, 116kDa                      |  | -1.5 | -1.5 | -2.2 | -2.2 | -1.3 |      | -1.2 | -1.2 | -2.0 | -2.0 | -2.2 |
| EIF4A1   | eukaryotic translation initiation factor 4A, isoform 1                                 |  | -1.7 | -1.4 | -2.0 | -2.0 | -1.3 |      |      |      | -1.8 | -1.8 |      |
| EIF4A2   | eukaryotic translation initiation factor 4A, isoform 2                                 |  |      |      |      |      |      |      | 1.4  | 1.4  |      |      | -1.3 |

|          |                                                                                                                                                            |      |      |  |      |      |      |      |       |       |      |      |      |      |
|----------|------------------------------------------------------------------------------------------------------------------------------------------------------------|------|------|--|------|------|------|------|-------|-------|------|------|------|------|
| EIF4B    | eukaryotic translation initiation factor 4B                                                                                                                |      |      |  | 1.3  |      |      |      | 1.8   | 1.8   | -2.4 | -2.4 | -1.8 | -1.8 |
| EIF4E    | eukaryotic translation initiation factor 4E                                                                                                                |      |      |  | -1.3 |      | -1.4 |      | -1.3  | -1.3  | 1.3  |      | -1.4 | -1.4 |
| EIF4E2   | eukaryotic translation initiation factor 4E family member 2                                                                                                |      |      |  |      |      |      |      | -1.6  | -1.6  | 1.2  | 1.2  | 1.5  | 1.5  |
| EIF4EBP1 | eukaryotic translation initiation factor 4E binding protein 1                                                                                              |      |      |  | -1.9 | -1.9 | -1.6 |      |       |       | -3.1 | -3.1 | -5.7 | -5.7 |
| EIF4EBP2 | eukaryotic translation initiation factor 4E binding protein 2                                                                                              |      |      |  | 1.2  |      |      |      |       |       | -1.3 | -1.3 | -1.3 | -1.3 |
| EIF4G1   | eukaryotic translation initiation factor 4 gamma, 1                                                                                                        | -1.5 |      |  | -1.5 | -1.5 | -1.4 | -1.4 |       |       |      |      | -1.4 | -1.4 |
| EIF4G2   | eukaryotic translation initiation factor 4 gamma, 2                                                                                                        |      |      |  |      |      |      |      |       |       |      |      |      |      |
| EIF4G3   | eukaryotic translation initiation factor 4 gamma, 3                                                                                                        |      |      |  |      |      | -1.5 |      | 1.8   |       | -1.2 | -1.2 | -1.6 | -1.6 |
| EIF5     | eukaryotic translation initiation factor 5                                                                                                                 | -1.3 |      |  | -1.5 | -1.5 | -1.3 |      | 1.2   | 1.2   | -1.2 |      | -1.8 | -1.8 |
| EIF5A    | eukaryotic translation initiation factor 5A                                                                                                                |      |      |  |      |      | -1.2 |      | -10.2 | -10.2 | -2.0 | -2.0 | 3.5  | 3.5  |
| EIF5B    | eukaryotic translation initiation factor 5B                                                                                                                | 1.6  |      |  | -1.7 | -1.7 | -1.2 |      | 2.5   | 2.5   | -1.6 | -1.6 | -4.3 | -4.3 |
| ELAC2    | elaC homolog 2 (E. coli)                                                                                                                                   | -1.4 |      |  | -1.3 |      |      |      |       |       | 1.4  |      | 1.2  |      |
| ELAVL3   | ELAV (embryonic lethal, abnormal vision, Drosophila)-like 3 (Hu antigen C)                                                                                 |      |      |  |      |      | 1.6  |      |       |       |      |      |      |      |
| ELF1     | E74-like factor 1 (ets domain transcription factor)                                                                                                        |      |      |  | 1.6  | 1.6  |      |      | -1.8  | -1.8  | 1.4  | 1.4  | 2.7  | 2.7  |
| ELF2     | E74-like factor 2 (ets domain transcription factor)                                                                                                        |      |      |  | 1.3  |      |      |      | -1.8  | -1.8  |      |      | 1.4  | 1.4  |
| ELK1     | ELK1, member of ETS oncogene family                                                                                                                        |      |      |  |      |      | 1.3  |      | -1.2  |       |      |      | 1.5  | 1.4  |
| ELK3     | ELK3, ETS-domain protein (SRF accessory protein 2)                                                                                                         |      |      |  |      |      |      |      | 5.2   | 5.2   |      |      | -2.4 | -2.4 |
| ELMO1    | engulfment and cell motility 1                                                                                                                             | -1.3 |      |  |      |      |      |      | 3.6   | 3.6   | 2.1  | 2.1  |      |      |
| ELOVL5   | ELOVL family member 5, elongation of long chain fatty acids (FEN1/Elo2, SUR4/Elo3-like, yeast)                                                             |      |      |  | 1.4  | 1.4  |      |      | -1.6  | -1.6  | -2.0 | 1.3  | 1.8  | 1.8  |
| ELOVL6   | ELOVL family member 6, elongation of long chain fatty acids (FEN1/Elo2, SUR4/Elo3-like, yeast)                                                             | -1.3 |      |  |      |      | 1.4  |      | -3.4  | -3.4  | -3.8 | -3.8 | -1.8 | -1.8 |
| EMD      | emerin (Emery-Dreifuss muscular dystrophy)                                                                                                                 |      |      |  |      |      |      |      |       |       |      |      | -1.4 |      |
| EMP3     | epithelial membrane protein 3                                                                                                                              |      |      |  | -1.3 |      |      |      |       |       |      |      |      |      |
| ENO1     | enolase 1, (alpha)                                                                                                                                         | -1.3 | -1.3 |  | -1.6 | -1.6 | -1.5 |      |       |       | -1.5 | -1.5 | -2.6 | -2.6 |
| ENO2     | enolase 2 (gamma, neuronal)                                                                                                                                | -1.2 |      |  | -1.4 |      | -1.5 |      |       |       |      |      |      |      |
| ENTH     | clathrin interactor 1                                                                                                                                      |      |      |  | 1.3  |      |      |      | 2.5   | 2.5   | 1.9  | 1.9  | -1.5 | -1.5 |
| ENTPD4   | ectonucleoside triphosphate diphosphohydrolase 4                                                                                                           | 1.3  |      |  | 1.4  |      | -1.4 |      | 1.5   | 1.5   | 1.3  | 1.3  |      |      |
| ENTPD6   | ectonucleoside triphosphate diphosphohydrolase 6 (putative function)                                                                                       | -1.2 |      |  | -1.4 | -1.4 |      |      |       |       |      |      | -2.0 | -2.0 |
| EP300    | E1A binding protein p300                                                                                                                                   |      |      |  |      |      | -1.3 |      |       |       |      |      | 1.4  | 1.4  |
| EP400    | E1A binding protein p400                                                                                                                                   |      |      |  |      |      |      |      | 1.3   | 1.3   | 1.4  | 1.4  | -1.6 |      |
| EPAS1    | endothelial PAS domain protein 1                                                                                                                           | -1.3 |      |  |      |      |      |      |       |       | 15.9 | 15.9 | 70.9 | 70.9 |
| EPB41    | erythrocyte membrane protein band 4.1 (elliptocytosis 1, RH-linked)                                                                                        |      |      |  | 1.5  |      | 1.3  |      | -2.0  |       | -2.3 |      | -1.7 | -1.7 |
| EPB41L2  | erythrocyte membrane protein band 4.1-like 2                                                                                                               |      |      |  | 1.2  |      |      |      | 1.8   | 1.8   |      |      | -1.9 | -1.9 |
| EPHA1    | EPH receptor A1                                                                                                                                            | 1.7  | 1.7  |  |      |      |      |      |       |       |      |      |      |      |
| EPHB6    | EPH receptor B6                                                                                                                                            | -1.4 |      |  | -1.9 | -1.9 | -1.8 | -1.8 |       |       |      |      |      |      |
| EPIM     | syntaxin 2                                                                                                                                                 |      |      |  | -1.2 |      | 1.3  |      | 1.3   | 1.3   | 1.5  |      |      |      |
| EPM2A    | epilepsy, progressive myoclonus type 2A, Lafora disease (laforin)                                                                                          |      |      |  |      |      |      |      | -2.2  | -2.2  |      |      | 1.6  |      |
| EPOR     | erythropoietin receptor                                                                                                                                    |      |      |  | 1.2  |      | 1.7  |      | 16.6  | 16.6  |      |      | -6.1 | -6.1 |
| EPRS     | glutamyl-prolyl-tRNA synthetase                                                                                                                            |      |      |  |      |      |      |      | 1.3   | 1.3   | -1.7 | -1.7 | -2.4 | -2.4 |
| EPS15    | epidermal growth factor receptor pathway substrate 15                                                                                                      | 1.3  | 1.3  |  | 1.4  | 1.4  |      |      | 1.6   | 1.6   | 1.8  | 1.8  | 1.5  | 1.5  |
| ERAL1    | Era G-protein-like 1 (E. coli)                                                                                                                             |      |      |  |      |      |      |      |       |       |      |      |      |      |
| ERCC1    | excision repair cross-complementing rodent repair deficiency, complementation group 1 (includes overlapping antisense sequence)                            | -1.3 | -1.3 |  | -1.4 | -1.3 | -1.3 |      | -1.8  | -1.8  | 1.3  | 1.3  |      |      |
| ERCC2    | excision repair cross-complementing rodent repair deficiency, complementation group 2 (xeroderma pigmentosum D)                                            | 1.2  |      |  |      |      |      |      |       |       |      |      |      |      |
| ERCC3    | excision repair cross-complementing rodent repair deficiency, complementation group 3 (xeroderma pigmentosum group B complementing)                        |      |      |  | 1.2  |      |      |      |       |       | -1.3 | -1.3 |      |      |
| ERCC4    | excision repair cross-complementing rodent repair deficiency, complementation group 4                                                                      | 1.5  |      |  | 1.2  |      |      |      | -1.3  |       |      |      | 1.2  |      |
| ERCC5    | excision repair cross-complementing rodent repair deficiency, complementation group 5 (xeroderma pigmentosum, complementation group G (Cockayne syndrome)) | 1.6  |      |  | 1.6  | 1.3  |      |      | -1.4  | -1.4  | -1.3 |      | 1.8  | 1.8  |
| ERCC8    | excision repair cross-complementing rodent repair deficiency, complementation group 8                                                                      |      |      |  | 1.3  | 1.3  |      |      |       |       | -1.8 | -1.8 | -1.8 | -1.4 |
| ERF      | Ets2 repressor factor                                                                                                                                      |      |      |  | 1.3  |      | 1.4  |      | 2.1   | 2.1   | -1.5 | -1.5 | -2.5 | -2.5 |
| ERG      | v-ets erythroblastosis virus E26 oncogene homolog (avian)                                                                                                  |      |      |  |      |      | -1.4 |      | -2.7  | -2.7  | 1.8  | 1.8  | 2.1  | 2.1  |
| ERH      | enhancer of rudimentary homolog (Drosophila)                                                                                                               |      |      |  |      |      | -1.2 |      | -1.2  | -1.2  |      |      |      |      |
| ERP29    | endoplasmic reticulum protein 29                                                                                                                           |      |      |  | -1.3 |      |      |      | 1.4   | 1.4   | -1.3 | -1.3 | -1.8 | -1.8 |
| ESD      | esterase D/formylglutathione hydrolase                                                                                                                     |      |      |  |      |      | -1.5 |      | 2.3   | 2.3   | 1.7  | 1.7  | -1.9 | -1.9 |
| ESPL1    | extra spindle pole bodies homolog 1 (S. cerevisiae)                                                                                                        | 1.3  | 1.3  |  |      |      | 1.2  |      | -1.2  |       | 1.3  | 1.3  | 1.2  |      |
| ESRRA    | estrogen-related receptor alpha                                                                                                                            | -1.3 |      |  | -1.3 |      |      |      | 1.4   | 1.4   |      |      | -1.3 | -1.3 |
| EST1B    | Smg-5 homolog, nonsense mediated mRNA decay factor (C. elegans)                                                                                            |      |      |  | -1.7 | -1.7 |      |      |       |       |      |      | -1.4 |      |
| ETF1     | eukaryotic translation termination factor 1                                                                                                                |      |      |  |      |      | -1.3 |      | 1.3   | 1.3   | -1.6 | -1.6 | -2.4 | -2.4 |
| ETFA     | electron-transfer-flavoprotein, alpha polypeptide (glutaric aciduria II)                                                                                   |      |      |  |      |      |      |      | -1.3  | -1.3  |      |      |      |      |
| ETFB     | electron-transfer-flavoprotein, beta polypeptide                                                                                                           |      |      |  | 1.3  | 1.3  |      |      |       |       | 2.1  | 2.1  | -1.7 | -1.7 |
| ETFDH    | electron-transferring-flavoprotein dehydrogenase                                                                                                           |      |      |  | 1.3  |      | -1.2 |      |       |       |      |      |      |      |

|         |                                                                                                                   |      |      |      |      |      |       |       |       |       |      |      |      |      |
|---------|-------------------------------------------------------------------------------------------------------------------|------|------|------|------|------|-------|-------|-------|-------|------|------|------|------|
| ETHE1   | ethylmalonic encephalopathy 1                                                                                     |      | 1.3  |      | 1.4  | 1.4  |       |       | 1.6   | 1.6   | -1.3 | -1.3 | -1.6 | -1.6 |
| ETS1    | v-ets erythroblastosis virus E26 oncogene homolog 1 (avian)                                                       |      |      | 2.4  | 2.4  |      |       | -29.1 | -29.1 |       |      |      | 26.5 | 26.5 |
| ETS2    | v-ets erythroblastosis virus E26 oncogene homolog 2 (avian)                                                       | -1.6 | -1.3 |      |      |      | -1.7  | -1.7  | -1.5  | -1.5  | 5.1  | 5.1  | 4.1  | 4.1  |
| ETV5    | ets variant gene 5 (ets-related molecule)                                                                         | -1.3 |      |      |      |      | -10.4 | -10.4 |       |       | 1.9  | 1.9  |      |      |
| ETV6    | ets variant gene 6 (TEL oncogene)                                                                                 | -1.4 |      | -1.3 |      |      | -1.6  |       | 2.5   | 2.5   | -1.6 | -1.6 | -3.1 | -3.1 |
| EVER1   | transmembrane channel-like 6                                                                                      |      |      |      |      |      |       |       | 1.3   |       | 1.6  | 1.6  | -2.4 | -2.4 |
| EWSR1   | Ewing sarcoma breakpoint region 1                                                                                 |      |      |      |      |      |       |       | -1.3  |       | -1.5 |      | -1.3 | -1.3 |
| EXO1    | exonuclease 1                                                                                                     |      |      |      |      |      |       |       | -1.6  | -1.6  | -2.1 | -2.1 | -4.6 | -4.6 |
| EXOSC10 | exosome component 10                                                                                              |      |      |      |      |      |       |       |       |       |      |      |      |      |
| EXOSC2  | exosome component 2                                                                                               | -1.7 | -1.7 | -1.7 | -1.7 | -1.2 |       |       | -1.2  |       | -2.4 | -2.4 | -2.6 | -2.6 |
| EXOSC7  | exosome component 7                                                                                               | -1.8 | -1.8 | -2.3 | -2.3 | -1.7 |       |       |       |       |      |      | -2.1 | -2.1 |
| EXOSC8  | exosome component 8                                                                                               | -1.3 |      | -1.6 | -1.6 | -1.4 |       |       | -2.4  | -2.4  |      |      |      |      |
| EXT1    | exostoses (multiple) 1                                                                                            | 1.3  |      |      |      | -1.3 |       |       |       |       | -1.8 | -1.8 | -2.5 | -2.5 |
| EXTL2   | exostoses (multiple)-like 2                                                                                       | 1.2  |      |      |      | 1.2  |       |       | 1.5   | 1.5   | -2.0 | -2.0 | -1.9 | -1.9 |
| EXTL3   | exostoses (multiple)-like 3                                                                                       |      |      |      |      |      |       |       |       |       |      |      |      |      |
| EZH1    | enhancer of zeste homolog 1 (Drosophila)                                                                          |      |      | 1.3  |      |      |       |       | 1.3   | 1.3   | -1.4 | -1.4 | 2.0  | 2.0  |
| EZH2    | enhancer of zeste homolog 2 (Drosophila)                                                                          |      |      |      |      | -1.3 |       |       | -1.6  | -1.6  | -1.3 | -1.3 | -1.3 | -1.3 |
| F2RL3   | coagulation factor II (thrombin) receptor-like 3                                                                  |      |      |      |      |      |       |       |       |       | 2.1  | 2.1  |      |      |
| F8A1    | coagulation factor VIII-associated (intronic transcript) 1                                                        | 1.2  | 1.2  |      |      |      |       |       | 1.6   | 1.6   |      |      | -2.1 | -2.1 |
| FABP5   | fatty acid binding protein 5 (psoriasis-associated)                                                               | -1.2 |      | -1.3 |      |      |       |       | -2.2  | -2.2  | -4.4 | -4.4 | -2.5 | -2.5 |
| FADD    | Fas (TNFRSF6)-associated via death domain                                                                         |      |      |      |      | -1.9 | -1.9  |       |       |       |      |      | -1.3 | -1.3 |
| FADS1   | fatty acid desaturase 1                                                                                           | -1.5 |      | -4.1 | -4.1 | -1.9 | -1.9  | -1.5  | -1.5  | -1.5  | -1.5 | -1.5 | -1.8 | -1.8 |
| FADS2   | fatty acid desaturase 2                                                                                           | -1.4 |      | -1.7 | -1.7 | -1.3 |       |       | -1.9  | -1.9  | -2.0 | -2.0 |      |      |
| FADS3   | fatty acid desaturase 3                                                                                           | -1.2 | -1.2 |      |      |      |       | -3.1  | -3.1  | -1.3  |      |      | 5.6  | 5.6  |
| FAH     | fumarylacetoacetate hydrolase (fumarylacetoacetase)                                                               | -1.5 | -1.5 |      |      |      |       |       | 1.6   | 1.6   | -1.9 |      | -2.8 | -2.8 |
| FALZ    | bromodomain PHD finger transcription factor                                                                       | 1.3  |      |      |      |      |       |       | 1.6   | 1.6   | 1.6  | -1.5 | -1.5 | -1.3 |
| FAM38A  | family with sequence similarity 38, member A                                                                      | -1.3 |      | -1.3 | -1.3 |      |       |       | 2.6   | 2.6   | 2.6  | 2.6  | 1.8  | 1.8  |
| FAM3C   | family with sequence similarity 3, member C                                                                       |      |      | -1.3 |      | -1.4 |       |       | -2.2  | -2.2  | 2.0  | 2.0  | 12.1 | 12.1 |
| FAM89B  | family with sequence similarity 89, member B                                                                      |      |      |      |      | 1.2  |       |       | -2.5  | -2.5  |      |      | 5.2  | 5.2  |
| FANCG   | Fanconi anemia, complementation group G                                                                           | 1.2  |      |      |      |      |       |       |       |       | -1.3 | -1.3 | -2.0 | -2.0 |
| FANCL   | Fanconi anemia, complementation group L                                                                           |      |      | 1.2  |      |      |       |       | 1.6   | 1.6   |      |      | -2.8 | -2.8 |
| FARSLA  | phenylalanine-tRNA synthetase-like, alpha subunit                                                                 | -1.9 | -1.9 | -2.1 | -2.1 | -2.0 | -2.0  | 1.6   | 1.6   | 1.6   | -2.1 | -2.1 | -4.1 | -4.1 |
| FAS     | Fas (TNF receptor superfamily, member 6)                                                                          |      |      | 1.5  |      |      |       |       |       |       |      |      | 1.6  |      |
| FASN    | fatty acid synthase                                                                                               | -1.6 | -1.6 | -2.8 | -2.8 |      |       | -1.4  |       |       | -3.2 | -3.2 | -2.2 | -2.2 |
| FASTK   | Fas-activated serine/threonine kinase                                                                             |      |      |      |      |      |       |       |       |       |      |      |      |      |
| FAT     | FAT tumor suppressor homolog 1 (Drosophila)                                                                       | 1.8  | 1.8  | 2.3  | 2.3  | 1.6  |       |       |       |       |      |      |      |      |
| FAU     | Finkel-Biskamp-Reilly murine sarcoma virus (FBR-MuSV) ubiquitously expressed (fox derived); ribosomal protein S30 |      |      |      |      |      |       |       |       |       |      |      |      |      |
| FBL     | fibrillinin                                                                                                       | -1.4 | -1.4 | -1.4 | -1.4 | -1.4 | -1.4  | 1.4   | 1.4   | 1.4   | -1.2 | -1.2 | -2.1 | -2.1 |
| FBLN2   | fibulin 2                                                                                                         | 1.4  | 1.4  | 1.6  | 1.6  | 3.5  | 3.5   |       |       |       |      |      |      |      |
| FBN1    | fibillin 1                                                                                                        | 1.6  |      | 1.2  |      | 1.2  | 1.2   |       |       |       |      |      |      |      |
| FBXO7   | F-box protein 7                                                                                                   |      |      |      |      |      |       |       |       |       | 1.7  |      | 1.3  | 1.3  |
| FBXO9   | F-box protein 9                                                                                                   |      |      |      |      |      |       |       | 2.2   | 2.2   | -1.4 | -1.4 | -1.9 | -1.9 |
| FBXW11  | F-box and WD-40 domain protein 11                                                                                 |      |      |      |      | -1.4 |       |       | 1.3   | 1.3   | 1.3  | 1.3  |      |      |
| FCGR2A  | Fc fragment of IgG, low affinity IIa, receptor (CD32)                                                             |      |      |      |      |      | 1.3   |       | -2.0  | -2.0  |      |      |      |      |
| FCGR2B  | Fc fragment of IgG, low affinity IIb, receptor (CD32)                                                             |      |      |      |      |      |       |       |       |       |      |      |      |      |
| FCHSD2  | FCH and double SH3 domains 2                                                                                      |      |      |      |      |      |       |       | 1.9   | 1.9   | 3.0  | 3.0  | 4.0  | 4.0  |
| FDFT1   | farnesyl-diphosphate farnesyltransferase 1                                                                        |      |      | -1.8 | -1.8 | -1.4 |       |       | 1.5   | 1.4   | -1.4 |      | -1.3 | -1.2 |
| FDPS    | farnesyl diphosphate synthase (farnesyl pyrophosphate synthetase, dimethylallyltransferase, geranyltransferase)   | -1.3 |      | -1.5 | -1.5 | -1.5 |       |       | -2.3  | -2.3  |      |      | 1.6  | 1.6  |
| FDXR    | ferredoxin reductase                                                                                              |      |      |      |      |      |       |       |       |       | -1.4 |      |      |      |
| FECH    | ferrochelatase (protoporphyrin)                                                                                   |      |      | 2.0  | 2.0  | -1.3 |       |       |       |       |      |      | -1.8 | -1.8 |
| FEN1    | flap structure-specific endonuclease 1                                                                            |      |      |      |      | -1.4 |       |       | -1.3  | -1.3  | -1.8 | -1.8 | -2.9 | -2.9 |
| FES     | feline sarcoma oncogene                                                                                           |      |      |      |      |      |       |       |       |       |      |      |      |      |
| FEZ2    | fasciculation and elongation protein zeta 2 (zygin II)                                                            | 1.2  |      |      |      |      |       |       | 1.5   | 1.5   | 1.7  |      | 1.6  | 1.6  |
| FGF9    | fibroblast growth factor 9 (glia-activating factor)                                                               | 1.4  |      | 1.3  |      |      |       |       | -45.7 | -45.7 | -2.1 | -2.1 | 39.2 | 39.2 |
| FGFR1   | fibroblast growth factor receptor 1 (fms-related tyrosine kinase 2, Pfeiffer syndrome)                            | 1.6  | 1.6  | 3.1  | 3.1  | 1.4  |       |       | 7.4   | 7.4   |      |      | -1.6 | -1.6 |
| FGFR1OP | FGFR1 oncogene partner                                                                                            |      |      |      |      |      |       |       | 1.5   | 1.5   |      |      | -2.7 | -2.7 |
| FH      | fumarate hydratase                                                                                                | -1.2 |      | -1.4 | -1.4 | -1.2 |       |       | -1.4  | -1.4  | -2.1 | -2.1 | -2.6 | -2.6 |
| FHL1    | four and a half LIM domains 1                                                                                     | 3.3  | 3.3  | 6.6  | 6.6  | 13.7 | 13.7  | -2.1  | -2.1  | 1.8   | 1.8  | 1.8  | 9.6  | 9.6  |



|                  |                                                                                                                            |      |      |      |      |      |      |       |       |      |      |       |       |
|------------------|----------------------------------------------------------------------------------------------------------------------------|------|------|------|------|------|------|-------|-------|------|------|-------|-------|
| GAB1             | GRB2-associated binding protein 1                                                                                          |      |      | 2.1  |      |      |      | -2.4  | -2.4  | 2.0  | 2.0  | 7.5   | 7.5   |
| GABARAP          | GABA(A) receptor-associated protein                                                                                        | 1.2  |      |      |      | 1.3  |      | -1.3  | -1.3  |      |      | 2.1   | 2.1   |
| GABARAPL2        | GABA(A) receptor-associated protein-like 2                                                                                 |      |      |      |      |      |      |       |       | 1.2  |      | 1.7   | 1.7   |
| GABPB2           | GA binding protein transcription factor, beta subunit 2                                                                    | -1.2 |      | 1.9  |      | -1.4 |      | -1.7  | -1.7  | 1.5  | 1.5  | 1.8   | 1.8   |
| GABRE            | gamma-aminobutyric acid (GABA) A receptor, epsilon                                                                         |      |      | 1.4  |      |      |      |       |       |      |      |       |       |
| GADD45B          | growth arrest and DNA-damage-inducible, beta                                                                               |      |      | -1.2 |      | 2.0  |      | 1.3   | 1.3   | 1.5  | 1.5  | 1.4   | 1.4   |
| GAK              | cyclin G associated kinase                                                                                                 |      |      |      |      |      |      | 1.4   | 1.4   | 1.2  |      | -1.4  |       |
| GALC             | galactosylceramidase                                                                                                       | 1.5  |      | 1.6  | 1.6  |      |      | -2.1  | -2.1  |      |      | 1.5   | 1.5   |
| GALK2 (included) | galactokinase 2                                                                                                            | 1.3  |      |      |      |      |      | 1.3   | 1.3   |      |      | -1.7  | -1.7  |
| GALNT1           | UDP-N-acetyl-alpha-D-galactosamine polypeptide N-acetylglucosaminyltransferase 1 (GalNAc-T1)                               |      |      |      |      | -1.3 |      | 2.0   | 2.0   |      |      | -2.2  | -2.2  |
| GALNT10          | UDP-N-acetyl-alpha-D-galactosamine polypeptide N-acetylglucosaminyltransferase 10 (GalNAc-T10)                             |      |      |      |      |      |      |       |       | 1.3  |      | 2.2   | 2.2   |
| GALNT2           | UDP-N-acetyl-alpha-D-galactosamine polypeptide N-acetylglucosaminyltransferase 2 (GalNAc-T2)                               | -1.4 |      | -1.2 |      |      |      | -2.2  | -2.2  | 1.4  | 1.4  | 1.9   | 1.9   |
| GAMT             | guanidinoacetate N-methyltransferase                                                                                       |      |      | -2.2 | -2.2 |      |      |       |       | -2.2 | -2.2 | -2.9  | -2.9  |
| GANAB            | glucosidase, alpha; neutral AB                                                                                             |      |      |      |      |      |      |       |       | -1.3 | -1.3 | -1.2  | -1.2  |
| GAPD             | glyceraldehyde-3-phosphate dehydrogenase                                                                                   | -1.3 |      | -1.5 |      | 1.3  |      | -1.2  | -1.2  |      |      | 1.3   | 1.3   |
| GAPDHS           | glyceraldehyde-3-phosphate dehydrogenase, spermatogenic                                                                    |      |      |      |      |      |      | 1.8   | 1.8   |      |      | -2.4  | -2.4  |
| GARNL1           | GTPase activating Rap/RanGAP domain-like 1                                                                                 |      |      |      |      | -1.5 |      |       |       | 1.6  | 1.6  | 1.7   | 1.7   |
| GARS             | glycyl-tRNA synthetase                                                                                                     | -1.4 | -1.4 | -1.7 | -1.7 | -1.7 | -1.7 | 1.9   | 1.9   | -2.1 | -2.1 | -4.3  | -4.3  |
| GART             | phosphoribosylglycinamide formyltransferase, phosphoribosylglycinamide synthetase, phosphoribosylaminoimidazole synthetase | -1.6 | -1.6 | -1.6 | -1.6 | -1.6 |      | 1.4   | 1.4   | -2.4 | -2.4 | -4.2  | -4.2  |
| GAS2L1           | growth arrest-specific 2 like 1                                                                                            |      |      |      |      | 1.8  |      |       |       | 15.6 | 15.6 | 17.6  | 17.6  |
| GAS7             | growth arrest-specific 7                                                                                                   |      |      | -1.3 |      |      |      | -10.7 | -10.7 | 1.5  | 1.5  | 7.5   | 7.5   |
| GATA2            | GATA binding protein 2                                                                                                     |      |      |      |      | 1.4  |      | 3.6   | 3.6   |      |      | -4.0  | -4.0  |
| GATA3            | GATA binding protein 3                                                                                                     |      |      | 1.4  | 1.4  |      |      | -3.1  | -3.1  |      |      | 3.3   | 3.3   |
| GBAS             | glioblastoma amplified sequence                                                                                            |      |      |      |      | -1.5 |      | 4.0   | 4.0   |      |      | -3.2  | -3.2  |
| GBE1             | glucan (1,4-alpha)-, branching enzyme 1 (glycogen branching enzyme, Andersen disease, glycogen storage disease type IV)    |      |      |      |      |      | -1.3 |       |       | 1.3  | 1.3  | 1.4   | 1.4   |
| GBF1             | golgi-specific brefeldin A resistance factor 1                                                                             | 1.2  |      |      |      |      |      | 1.2   |       |      |      | 1.6   | 1.6   |
| GBP1             | guanylate binding protein 1, interferon-inducible, 67kDa                                                                   | 1.2  |      |      |      |      |      | -26.9 | -26.9 | -5.8 | -5.8 | 49.3  | 49.3  |
| GCAT             | glycine C-acetyltransferase (2-amino-3-ketobutyrate coenzyme A ligase)                                                     |      |      | -1.4 | -1.4 |      |      | 9.1   | 9.1   | -1.4 | -1.4 | -10.8 | -10.8 |
| GCDH             | glutaryl-Coenzyme A dehydrogenase                                                                                          | -1.3 | -1.3 | -1.3 | -1.3 |      |      |       |       | -1.5 |      | -1.3  | -1.3  |
| GCH1             | GTP cyclohydrolase 1 (dopa-responsive dystonia)                                                                            |      |      | -1.3 | -1.3 |      |      | -1.7  | -1.7  | -1.7 | -1.7 | 1.5   | 1.5   |
| GCHFR            | GTP cyclohydrolase I feedback regulator                                                                                    |      |      |      |      |      |      |       |       | -1.8 | -1.8 | 10.3  | 10.3  |
| GCLC             | glutamate-cysteine ligase, catalytic subunit                                                                               |      |      |      |      | -1.2 |      | 2.0   | 2.0   | 1.7  | 1.7  | -1.3  | -1.3  |
| GCLM             | glutamate-cysteine ligase, modifier subunit                                                                                |      |      |      |      |      |      | -2.5  | -2.5  | 2.4  | 2.4  | 3.6   | 3.6   |
| GCN1L1           | GCN1 general control of amino-acid synthesis 1-like 1 (yeast)                                                              |      |      | -1.3 | -1.3 |      |      | 1.3   | 1.3   | -1.4 | -1.4 | -1.5  | -1.5  |
| GCN5L2           | GCN5 general control of amino-acid synthesis 5-like 2 (yeast)                                                              | -1.4 | -1.4 | -1.5 | -1.5 |      |      | -1.4  | -1.4  | -1.3 | -1.3 | -1.3  | -1.3  |
| GCS1             | glucosidase I                                                                                                              |      |      |      |      |      |      |       |       | -1.3 | -1.3 | -1.7  | -1.7  |
| GCSH             | glycine cleavage system protein H (aminomethyl carrier)                                                                    | -1.6 | -1.6 | -1.5 | -1.5 | -1.7 |      | 2.1   | 2.1   | -3.0 | -3.0 | -4.6  | -4.6  |
| GDF10            | growth differentiation factor 10                                                                                           |      |      |      |      | -2.8 | -2.8 |       |       |      |      |       |       |
| GDI1             | GDP dissociation inhibitor 1                                                                                               |      |      |      |      | 1.5  |      | -1.6  | -1.6  | 1.4  | 1.4  | 2.4   | 2.4   |
| GDI2             | GDP dissociation inhibitor 2                                                                                               |      |      |      |      | -1.3 |      | 1.7   | 1.7   | 1.4  | 1.4  |       |       |
| GEMIN4           | gem (nuclear organelle) associated protein 4                                                                               | -1.3 |      | -1.5 | -1.5 | -1.5 | -1.5 | -1.6  | -1.6  |      |      | -3.0  | -3.0  |
| GF11             | growth factor independent 1                                                                                                | 1.3  |      |      |      | 1.4  |      | 65.2  | 65.2  |      |      | -5.9  | -5.9  |
| GFPT1            | glutamine-fructose-6-phosphate transaminase 1                                                                              | -1.4 |      |      |      | -1.4 |      | -2.1  | -2.1  |      |      |       |       |
| GGA3             | golgi associated, gamma adaptin ear containing, ARF binding protein 3                                                      |      |      |      |      | -1.5 | -1.5 | 2.0   | 2.0   | -1.4 |      | -1.2  |       |
| GGH              | gamma-glutamyl hydrolase (conjugase, folic/polygamma-glutamyl hydrolase)                                                   |      |      |      |      |      |      | -2.7  | -2.7  | 1.2  | 1.2  | 1.3   | 1.3   |
| GGPS1            | geranylgeranyl diphosphate synthase 1                                                                                      |      |      |      |      |      |      | -1.5  | -1.5  | 1.3  | 1.2  | 1.3   | -1.2  |
| GGT1             | gamma-glutamyltransferase 1                                                                                                |      |      | -1.6 | -1.6 | 1.5  |      |       |       |      |      |       |       |
| GIT2             | G protein-coupled receptor kinase interactor 2                                                                             |      |      | 1.3  | 1.3  | -1.3 |      | 12.8  | 12.8  |      |      | -2.8  | -2.8  |
| GJA7             | gap junction protein, alpha 7, 45kDa (connexin 45)                                                                         |      |      |      |      |      |      | -13.5 | -13.5 | 1.6  | 1.6  | 43.1  | 43.1  |
| GK               | glycerol kinase                                                                                                            |      |      | 1.9  |      |      |      |       |       |      |      | -1.8  |       |
| GLA              | galactosidase, alpha                                                                                                       |      |      | 1.2  |      | 1.2  |      | 2.3   | 2.3   | -1.2 |      | -3.6  | -3.6  |
| GLB1             | galactosidase, beta 1                                                                                                      | 1.4  | 1.4  | 2.3  | 2.3  | 1.9  | 1.9  | 2.3   | 2.3   |      |      | -1.9  | -1.9  |
| GLE1L            | GLE1 RNA export mediator-like (yeast)                                                                                      |      |      |      |      |      |      |       |       | -1.2 | -1.2 | -1.4  | -1.4  |
| GLG1             | golgi apparatus protein 1                                                                                                  |      |      |      |      | 1.2  |      |       |       |      |      | 1.9   | 1.9   |
| GLMN             | glomulin, FKBP associated protein                                                                                          |      |      | -1.3 | -1.3 |      |      | 3.5   | 3.5   |      |      | -2.2  | -2.2  |
| GLO1             | glyoxalase I                                                                                                               | -1.3 |      | -1.3 | -1.3 | -1.5 |      | 1.3   | 1.3   | -1.5 | -1.5 | -2.0  | -2.0  |
| GLRX             | glutaredoxin (thioltransferase)                                                                                            | 3.4  | 3.4  | 5.2  | 5.2  | 2.1  |      | -4.0  | -4.0  | 1.6  | 1.6  | 4.4   | 4.4   |
| GLS              | glutaminase                                                                                                                |      |      | 1.3  | 1.3  | 1.7  | 1.7  | 2.1   | 2.1   | -2.1 | -2.1 | -2.2  | -2.2  |

|         |                                                                                         |      |      |      |      |      |      |      |       |       |      |      |      |      |       |       |      |
|---------|-----------------------------------------------------------------------------------------|------|------|------|------|------|------|------|-------|-------|------|------|------|------|-------|-------|------|
| GLUD1   | glutamate dehydrogenase 1                                                               |      |      |      | -1.3 |      |      | -1.3 |       | -1.3  |      | 1.2  |      | -1.4 | -1.3  | -1.5  | -1.5 |
| GLUD2   | glutamate dehydrogenase 2                                                               |      |      |      |      |      |      |      |       |       |      | 1.2  |      |      |       | -1.5  | -1.5 |
| GLUL    | glutamate-ammonia ligase (glutamine synthetase)                                         | 1.9  | 1.9  | 2.2  | 2.2  | 3.4  |      |      | 2.3   | 2.3   | 2.5  | 2.5  |      | 2.5  |       | 1.8   | 1.8  |
| GM2A    | GM2 ganglioside activator                                                               | 1.3  | 1.3  | 2.1  | 2.1  | 1.5  |      |      | 1.4   |       | 1.5  |      |      |      |       | 1.6   | 1.6  |
| GMDS    | GDP-mannose 4,6-dehydratase                                                             |      |      | -1.2 |      |      |      |      |       |       |      |      |      |      |       | -1.4  | -1.4 |
| GMFB    | glia maturation factor, beta                                                            |      |      |      |      |      |      |      |       |       | 1.2  |      |      |      |       | 1.6   | 1.6  |
| GMFG    | glia maturation factor, gamma                                                           |      |      |      | 1.3  | 1.3  |      |      |       |       | 1.7  | 1.7  |      |      |       |       |      |
| GMPS    | guanine monophosphate synthetase                                                        | -1.3 |      | -1.3 | -1.3 | -1.4 |      |      | -1.4  | -1.4  | -1.4 | -1.4 |      | -1.4 |       | -2.1  | -2.1 |
| GNA11   | guanine nucleotide binding protein (G protein), alpha 11 (Gq class)                     | 1.4  |      |      |      |      |      |      | 1.6   | 1.6   | -1.4 |      |      |      |       | -4.6  | -4.6 |
| GNA13   | guanine nucleotide binding protein (G protein), alpha 13                                | -1.2 |      | 2.1  |      |      |      |      | 1.6   | 1.6   | 1.4  |      |      |      |       | -1.5  | -1.5 |
| GNA15   | guanine nucleotide binding protein (G protein), alpha 15 (Gq class)                     |      |      |      |      |      |      | -1.3 |       | -3.2  | -3.2 | 1.4  | 1.4  |      |       |       |      |
| GNAI2   | guanine nucleotide binding protein (G protein), alpha inhibiting activity polypeptide 2 |      |      |      |      |      |      |      |       |       |      |      |      |      |       |       |      |
| GNAI3   | guanine nucleotide binding protein (G protein), alpha inhibiting activity polypeptide 3 |      |      | 1.4  |      |      |      |      |       |       | 2.0  | 2.0  |      |      | 1.4   | 1.4   |      |
| GNAQ    | guanine nucleotide binding protein (G protein), q polypeptide                           | -1.3 |      | 1.3  |      |      |      |      | 5.0   | 5.0   | 1.3  | 1.3  |      |      | -1.6  | -1.6  |      |
| GNAS    | GNAS complex locus                                                                      |      |      | 1.3  |      | 1.3  |      |      | -1.7  | -1.7  | 1.7  | 1.7  |      |      | 2.4   | 2.4   |      |
| GNB1    | guanine nucleotide binding protein (G protein), beta polypeptide 1                      |      |      | -1.2 |      |      |      |      | -1.4  | -1.4  | 1.3  |      |      |      | 1.7   | 1.7   |      |
| GNB2    | guanine nucleotide binding protein (G protein), beta polypeptide 2                      |      |      |      |      |      |      |      | -1.7  | -1.7  | 1.4  | 1.4  |      |      | 1.7   | 1.7   |      |
| GNB2L1  | guanine nucleotide binding protein (G protein), beta polypeptide 2-like 1               |      |      |      |      |      |      |      |       |       |      | -1.6 | -1.6 |      | -1.5  | -1.5  |      |
| GNB5    | guanine nucleotide binding protein (G protein), beta 5                                  |      |      |      |      |      |      |      | -2.8  | -2.8  | -1.3 | -1.3 |      |      | 1.3   | 1.3   |      |
| GNE     | glucosamine (UDP-N-acetyl)-2-epimerase/N-acetylmannosamine kinase                       | -1.4 |      | -1.6 | -1.6 | -1.4 | -1.4 | -1.4 | -3.9  | -3.9  |      |      |      |      | 2.5   | 2.5   |      |
| GNG10   | guanine nucleotide binding protein (G protein), gamma 10                                | 1.2  |      | 1.3  | 1.3  |      |      |      |       |       |      |      |      |      |       |       |      |
| GNG5    | guanine nucleotide binding protein (G protein), gamma 5                                 |      |      |      |      | -1.3 |      |      |       |       |      |      |      |      |       |       |      |
| GNL1    | guanine nucleotide binding protein-like 1                                               |      |      | -1.3 |      | 1.8  |      |      | -1.3  | -1.3  | -1.2 |      |      |      | 1.3   | 1.3   |      |
| GNL2    | guanine nucleotide binding protein-like 2 (nucleolar)                                   |      |      |      |      | -1.4 |      |      |       |       | -1.4 | -1.4 |      |      | -2.0  | -2.0  |      |
| GNPAT   | glyceronephosphate O-acyltransferase                                                    | 1.4  | 1.4  |      |      |      |      |      |       |       |      |      |      |      | 1.4   | 1.4   |      |
| GNPDA1  | glucosamine-6-phosphate deaminase 1                                                     |      |      |      |      |      |      |      | 11.5  | 11.5  |      |      |      |      | -59.9 | -59.9 |      |
| GNS     | glucosamine (N-acetyl)-6-sulfatase (Sanfilippo disease IIID)                            | -1.5 |      |      |      |      |      |      | 2.8   | 2.8   |      |      |      |      | -2.0  | -2.0  |      |
| GOLGA1  | golgi autoantigen, golgin subfamily a, 1                                                |      |      |      |      |      |      |      |       |       |      |      |      |      | 1.5   | 1.5   |      |
| GOLGA2  | golgi autoantigen, golgin subfamily a, 2                                                |      |      |      |      | -1.3 |      |      | 1.7   | 1.7   |      |      |      |      |       |       |      |
| GOLGA3  | golgi autoantigen, golgin subfamily a, 3                                                |      |      |      |      | 1.3  |      |      |       |       |      |      |      |      | -1.6  | -1.6  |      |
| GOLGA4  | golgi autoantigen, golgin subfamily a, 4                                                |      |      | 1.4  |      |      |      |      | 1.5   |       | -1.2 |      |      |      | -1.5  | -1.5  |      |
| GORASP2 | golgi reassembly stacking protein 2, 55kDa                                              |      |      | -1.4 |      | -1.2 |      |      | 1.8   | 1.8   | -1.3 | -1.3 |      |      | -2.0  | -2.0  |      |
| GOSR1   | golgi SNAP receptor complex member 1                                                    |      |      |      |      | 1.3  |      |      | 1.5   | 1.5   |      |      |      |      | -1.7  | -1.7  |      |
| GOSR2   | golgi SNAP receptor complex member 2                                                    |      |      | 1.6  | 1.6  |      |      |      | 1.2   |       | -1.3 |      |      |      | -1.5  | -1.5  |      |
| GOT1    | glutamic-oxaloacetic transaminase 1, soluble (aspartate aminotransferase 1)             |      |      |      |      |      |      |      | 1.2   |       | -1.5 |      |      |      | -1.4  | -1.4  |      |
| GOT2    | glutamic-oxaloacetic transaminase 2, mitochondrial (aspartate aminotransferase 2)       | -1.3 | -1.3 | -1.3 | -1.3 | -1.4 |      |      | -1.3  |       |      |      |      |      | -1.5  | -1.5  |      |
| GP5     | glycoprotein V (platelet)                                                               |      |      |      |      |      |      |      |       |       |      |      |      |      |       |       |      |
| GPA33   | glycoprotein A33 (transmembrane)                                                        |      |      | 1.4  |      |      |      | -1.5 | -1.5  |       |      |      |      |      |       |       |      |
| GPAA1   | glycosylphosphatidylinositol anchor attachment protein 1 homolog (yeast)                |      |      |      |      |      |      |      | 1.7   |       |      |      |      |      | -2.2  | -1.4  |      |
| GPATCH8 | G patch domain containing 8                                                             | 1.2  |      | 1.6  | 1.6  |      |      |      | 1.4   |       | 1.7  | 1.7  |      |      | 3.5   | 3.5   |      |
| GPC1    | glypican 1                                                                              | -1.2 |      |      |      | 1.4  |      |      | -1.2  |       | 1.4  | 1.4  |      |      | 1.6   | 1.6   |      |
| GPC3    | glypican 3                                                                              |      |      |      |      |      |      |      |       |       |      |      |      |      |       |       |      |
| GPI     | glucose phosphate isomerase                                                             | -1.2 |      | -1.2 |      |      |      |      |       |       | -3.3 | -3.3 |      |      | -2.0  | -2.0  |      |
| GPLD1   | glycosylphosphatidylinositol specific phospholipase D1                                  |      |      | 1.2  |      |      |      |      | -2.3  | -2.3  | -1.7 | -1.7 |      |      | -1.4  | -1.4  |      |
| GPR125  | G protein-coupled receptor 125                                                          | -1.8 | -1.8 | -1.5 |      | -1.6 |      |      | -1.2  |       |      |      |      |      | -4.2  | -4.2  |      |
| GPR161  | G protein-coupled receptor 161                                                          | -1.2 |      |      |      |      |      |      | -1.2  |       |      |      |      |      |       |       |      |
| GPR30   | G protein-coupled receptor 30                                                           |      |      |      |      |      |      |      |       |       |      |      |      |      |       |       |      |
| GPR56   | G protein-coupled receptor 56                                                           | 1.3  |      |      |      | 1.2  |      |      |       |       | 25.3 | 25.3 |      |      |       |       |      |
| GPS2    | G protein pathway suppressor 2                                                          |      |      |      |      |      |      |      | -4.7  | -4.7  |      |      |      |      | 3.8   | 3.8   |      |
| GPSM2   | G-protein signalling modulator 2 (AGS3-like, C. elegans)                                | 1.7  | 1.7  |      |      |      |      |      | -1.8  | -1.8  | 1.9  | 1.6  |      |      | 2.7   | 2.7   |      |
| GPSM3   | G-protein signalling modulator 3 (AGS3-like, C. elegans)                                |      |      |      |      |      |      |      | -1.9  | -1.9  |      |      |      |      | 3.0   | 3.0   |      |
| GPSN2   | glycoprotein, synaptic 2                                                                |      |      | -1.2 |      |      |      |      | -1.3  | -1.3  | -1.2 |      |      |      | -1.5  | -1.5  |      |
| GPX1    | glutathione peroxidase 1                                                                |      |      | -1.2 | -1.2 |      |      |      | 1.7   | 1.7   | 1.7  | 1.7  |      |      |       |       |      |
| GPX4    | glutathione peroxidase 4 (phospholipid hydroperoxidase)                                 |      |      | -1.4 | -1.4 | -1.3 |      |      | 1.8   | 1.8   |      |      |      |      | -2.2  | -2.2  |      |
| GPX7    | glutathione peroxidase 7                                                                |      |      |      |      |      |      |      | 1.9   | 1.9   |      |      |      |      | -1.5  | -1.5  |      |
| GRAP2   | GRB2-related adaptor protein 2                                                          | 2.4  | 2.4  | 2.9  | 2.9  | 3.6  | 3.6  |      |       |       |      |      |      |      |       |       |      |
| GRB10   | growth factor receptor-bound protein 10                                                 |      |      | -1.6 | -1.6 |      |      |      | -12.4 | -12.4 | -1.4 | -1.4 |      |      | 11.1  | 11.1  |      |
| GRB2    | growth factor receptor-bound protein 2                                                  |      |      |      |      | -1.4 |      |      | 1.9   | 1.9   | -1.8 | -1.8 |      |      | -3.3  | -3.3  |      |

|        |                                                                                                                                       |      |      |      |      |      |      |       |       |      |      |       |       |      |
|--------|---------------------------------------------------------------------------------------------------------------------------------------|------|------|------|------|------|------|-------|-------|------|------|-------|-------|------|
| GREB1  | GREB1 protein                                                                                                                         |      |      |      |      | 2.6  | 2.6  | 8.1   | 8.1   |      |      | -11.0 | -11.0 |      |
| GREM1  | gremlin 1, cysteine knot superfamily, homolog (Xenopus laevis)                                                                        |      |      |      |      |      |      | -42.1 | -42.1 |      |      |       |       |      |
| GRHPR  | glyoxylate reductase/hydroxypyruvate reductase                                                                                        |      |      |      |      |      |      | 1.4   | 1.4   | -1.6 | -1.6 | -1.3  | -1.3  |      |
| GRIK5  | glutamate receptor, ionotropic, kainate 5                                                                                             |      |      |      |      | 1.4  |      | 4.2   | 4.2   |      |      | -14.5 | -14.5 |      |
| GRINA  | glutamate receptor, ionotropic, N-methyl D-aspartate-associated protein 1 (glutamate binding)                                         |      |      |      |      |      |      |       |       | -1.8 | -1.8 |       |       |      |
| GRIP2  | glutamate receptor interacting protein 2                                                                                              |      |      |      |      |      |      |       |       |      |      |       |       |      |
| GRK5   | G protein-coupled receptor kinase 5                                                                                                   |      |      |      |      |      |      |       |       |      |      |       |       |      |
| GRK6   | G protein-coupled receptor kinase 6                                                                                                   | 1.3  |      |      |      |      |      | 14.8  | 14.8  | 2.8  | 2.8  | -3.8  | -3.8  |      |
| GRLF1  | glucocorticoid receptor DNA binding factor 1                                                                                          |      |      |      | -1.3 |      | 1.5  | -1.5  | 1.4   | 1.5  |      | 1.3   | -1.2  |      |
| GRM4   | glutamate receptor, metabotropic 4                                                                                                    |      |      |      | 1.4  |      | 1.7  |       |       |      |      |       |       |      |
| GRSF1  | G-rich RNA sequence binding factor 1                                                                                                  | -1.2 |      |      |      |      | -1.5 |       | -1.2  |      |      | -2.7  | -2.7  |      |
| GSK3A  | glycogen synthase kinase 3 alpha                                                                                                      |      |      |      | -1.2 |      |      |       |       |      | -1.3 |       |       |      |
| GSK3B  | glycogen synthase kinase 3 beta                                                                                                       | 1.6  |      |      | 1.9  | 1.9  | 1.2  | 2.1   | 2.1   | 1.5  | 1.3  | -2.3  | -2.3  |      |
| GSPT1  | G1 to S phase transition 1                                                                                                            | -1.5 | -1.5 | -1.4 | -1.4 | -1.4 | -1.8 | -1.6  | -1.6  | -1.2 | -1.2 | -1.4  | -1.4  |      |
| GSR    | glutathione reductase                                                                                                                 |      |      |      | 1.2  |      | 1.3  | -1.6  | -1.6  | 1.4  |      | 1.2   | 1.2   |      |
| GSS    | glutathione synthetase                                                                                                                |      |      |      |      |      |      | 1.3   |       | -1.3 | -1.3 | -2.2  | -2.2  |      |
| GSTM1  | glutathione S-transferase M1                                                                                                          |      |      |      |      |      | 1.3  | -1.6  | -1.6  | -1.7 | -1.7 | 2.3   | 2.3   |      |
| GSTO1  | glutathione S-transferase omega 1                                                                                                     |      |      |      |      |      |      | 1.8   | 1.8   | -1.3 | -1.3 | -3.0  | -3.0  |      |
| GSTP1  | glutathione S-transferase pi                                                                                                          |      |      |      |      |      |      | -1.2  | -1.2  | -1.3 |      | -1.7  | -1.7  |      |
| GSTZ1  | glutathione transferase zeta 1 (maleylacetoacetate isomerase)                                                                         | 1.2  |      |      |      |      |      |       |       |      |      |       |       |      |
| GTF2A2 | general transcription factor IIA, 2, 12kDa                                                                                            | 1.6  |      |      | 1.8  | 1.8  | 1.5  | 1.5   | -2.8  | -2.8 | -1.3 | -1.2  | 1.6   | 1.6  |
| GTF2B  | general transcription factor IIB                                                                                                      |      |      |      | 1.4  |      |      |       | -1.2  | -1.2 |      |       |       |      |
| GTF2E1 | general transcription factor IIE, polypeptide 1, alpha 56kDa                                                                          |      |      |      |      |      |      |       | 1.2   |      | -1.2 |       | -1.5  | -1.5 |
| GTF2E2 | general transcription factor IIE, polypeptide 2, beta 34kDa                                                                           | -1.4 | -1.4 |      |      |      | -1.3 | -1.5  | -1.5  | -1.3 | -1.3 |       |       |      |
| GTF2F1 | general transcription factor IIF, polypeptide 1, 74kDa                                                                                | 1.2  | 1.2  |      |      |      |      | 1.3   |       | -1.7 | -1.7 |       |       |      |
| GTF2F2 | general transcription factor IIF, polypeptide 2, 30kDa                                                                                | -1.5 |      |      | -1.5 |      |      |       |       |      |      |       | -1.3  |      |
| GTF2H1 | general transcription factor IIH, polypeptide 1, 62kDa                                                                                |      |      |      |      |      | -1.2 | 1.3   | 1.3   | -1.4 | -1.3 | -2.0  | -2.0  |      |
| GTF2H2 | general transcription factor IIH, polypeptide 2, 44kDa                                                                                | -2.1 |      |      |      |      | -1.9 | 2.1   | 2.1   | 1.3  |      | -3.2  | -3.2  |      |
| GTF2H3 | general transcription factor IIH, polypeptide 3, 34kDa                                                                                |      |      |      | 1.3  |      | -1.2 |       |       | -1.4 | -1.4 | -1.5  |       |      |
| GTF2H4 | general transcription factor IIH, polypeptide 4, 52kDa                                                                                |      |      |      |      |      | -1.3 | -1.3  | 1.7   | 1.7  |      |       |       |      |
| GTF2H5 | general transcription factor IIH, polypeptide 5                                                                                       |      |      |      |      |      | -1.4 |       |       |      |      | 1.4   | 1.4   |      |
| GTF2I  | general transcription factor II, i                                                                                                    | -1.2 |      |      | 1.4  | 1.4  | -1.3 | -2.1  | -2.1  |      |      | 2.3   | 2.3   |      |
| GTF3A  | general transcription factor IIIA                                                                                                     | -1.3 |      |      | -1.6 | -1.6 | -1.5 | -1.7  | -1.7  | -1.4 | -1.4 | -2.0  | -2.0  |      |
| GTF3C1 | general transcription factor IIIC, polypeptide 1, alpha 220kDa                                                                        |      |      |      |      |      |      | -1.3  | -1.3  | -1.5 |      | 1.7   | 1.7   |      |
| GTF3C2 | general transcription factor IIIC, polypeptide 2, beta 110kDa                                                                         |      |      |      |      |      |      |       |       | -2.0 | -2.0 | -1.5  | -1.5  | -1.2 |
| GTPBP6 | GTP binding protein 6 (putative)                                                                                                      | -1.4 |      |      | -1.8 | -1.8 | -1.3 | -2.2  | -2.2  |      |      | 1.8   | 1.8   |      |
| GTSE1  | G-2 and S-phase expressed 1                                                                                                           |      |      |      |      |      |      | -1.7  | -1.7  | 2.1  | 1.6  | 2.0   | 2.0   |      |
| GUK1   | guanylate kinase 1                                                                                                                    |      |      |      |      |      |      |       |       |      |      |       |       |      |
| GUSB   | glucuronidase, beta                                                                                                                   |      |      |      |      |      |      |       | 1.2   | 1.2  |      |       |       |      |
| GYG1   | glycogenin 1                                                                                                                          |      |      |      | 1.3  |      |      |       |       | 3.8  | 3.8  | 2.7   | 2.7   |      |
| GYPC   | glycophorin C (Gerbich blood group)                                                                                                   |      |      |      |      |      | 2.8  | 2.8   | 1.8   | 1.8  |      | -1.8  | -1.8  |      |
| GYS1   | glycogen synthase 1 (muscle)                                                                                                          | 1.3  |      |      |      |      |      | 1.5   | 1.5   | -1.3 | -1.3 |       |       |      |
| H1F0   | H1 histone family, member 0                                                                                                           | 1.4  |      |      | 2.0  | 2.0  | 2.5  | 2.5   | 8.1   | 8.1  | 2.4  | 2.4   | -5.6  | -5.6 |
| H1FX   | H1 histone family, member X                                                                                                           | 1.5  | 1.5  | 1.4  |      |      | 1.3  | 1.3   | -3.2  | -3.2 |      | 3.7   | 3.7   |      |
| H2AFX  | H2A histone family, member X                                                                                                          | 1.2  |      |      |      |      |      |       | -2.6  | -2.6 |      | 1.3   | 1.3   |      |
| H2AFY  | H2A histone family, member Y                                                                                                          |      |      |      |      |      |      |       | -1.9  | -1.9 | -1.6 | -1.6  | -2.8  | -2.8 |
| H2AFZ  | H2A histone family, member Z                                                                                                          |      |      |      |      |      |      |       | -1.2  |      |      | -1.9  | -1.9  |      |
| H3F3A  | H3 histone, family 3A                                                                                                                 |      |      |      |      |      |      |       | -1.2  | -1.2 |      | 1.3   | 1.3   |      |
| H3F3B  | H3 histone, family 3B (H3.3B)                                                                                                         |      |      |      |      |      | -1.3 | 4.1   | 4.1   | 1.3  | 1.3  | -2.2  | -2.2  |      |
| H41    | CDV3 homolog (mouse)                                                                                                                  | 1.2  |      |      | 1.5  | 1.5  | 1.2  | 1.3   | 1.3   | -1.2 | -1.2 | -1.4  | -1.4  |      |
| H6PD   | hexose-6-phosphate dehydrogenase (glucose 1-dehydrogenase)                                                                            |      |      |      |      |      |      |       | -2.4  | -2.4 |      | 2.5   |       |      |
| HADH   | hydroxyacyl-Coenzyme A dehydrogenase                                                                                                  |      |      |      |      |      |      |       |       |      |      |       |       |      |
| HADH2  | hydroxysteroid (17-beta) dehydrogenase 10                                                                                             | -1.2 |      |      |      |      |      |       | -1.2  | -1.2 |      | -1.4  |       |      |
| HADHA  | hydroxyacyl-Coenzyme A dehydrogenase/3-ketoacyl-Coenzyme A thiolase/enoyl-Coenzyme A hydratase (trifunctional protein), alpha subunit |      |      |      |      |      |      |       | 1.3   |      | 1.5  | 1.5   | -1.3  |      |
| HADHB  | hydroxyacyl-Coenzyme A dehydrogenase/3-ketoacyl-Coenzyme A thiolase/enoyl-Coenzyme A hydratase (trifunctional protein), beta subunit  |      |      |      |      |      |      |       | 1.8   | 1.8  |      | -1.4  | -1.4  | -1.4 |
| HADHSC | --                                                                                                                                    |      |      |      | 1.3  |      | -1.3 |       |       |      | -1.7 | -1.7  | -1.3  | -1.3 |
| HAGH   | hydroxyacylglutathione hydrolase                                                                                                      |      |      |      |      |      |      |       |       | 1.3  |      | 2.2   | 2.2   |      |
| HAN11  | WD repeat domain 68                                                                                                                   | 1.2  |      |      | 1.3  |      |      |       | 1.8   | 1.8  | 1.3  | -1.2  | -1.7  | -1.7 |

|           |                                                                                                |      |      |       |       |      |      |      |      |      |      |      |      |
|-----------|------------------------------------------------------------------------------------------------|------|------|-------|-------|------|------|------|------|------|------|------|------|
| HARSL     | histidyl-tRNA synthetase-like                                                                  |      |      |       |       | 1.3  |      | 1.2  |      |      |      |      |      |
| HAT1      | histone acetyltransferase 1                                                                    |      |      |       |       | -1.3 |      | 1.6  | 1.6  |      |      | -4.0 | -4.0 |
| HAX1      | HCLS1 associated protein X-1                                                                   | -1.2 |      |       |       | -1.3 | -1.3 | -1.3 | -1.3 | -1.7 | -1.7 | -1.3 | -1.3 |
| HBP1      | HMG-box transcription factor 1                                                                 | 1.5  | 1.8  | 1.8   |       | 1.6  | 1.6  | 1.6  | 1.6  | 1.4  | 1.4  | 1.5  | 1.5  |
| HBXIP     | hepatitis B virus x interacting protein                                                        | -1.2 |      |       | -1.3  |      |      |      |      |      | 1.2  | 1.2  |      |
| HCAP-D3   | non-SMC condensin II complex, subunit D3                                                       |      |      |       |       |      |      |      |      | -2.1 | -2.1 | -2.9 | -2.9 |
| HCCS      | holocytochrome c synthase (cytochrome c heme-lyase)                                            |      |      |       |       |      |      |      |      | -1.2 | -1.2 | -2.0 | -2.0 |
| HCFC1     | host cell factor C1 (VP16-accessory protein)                                                   |      |      |       |       | -1.4 |      | -1.5 | -1.5 |      |      | 1.2  | 1.2  |
| HCK       | hemopoietic cell kinase                                                                        |      | 1.3  |       |       |      |      |      |      |      |      |      |      |
| HCLS1     | hematopoietic cell-specific Lyn substrate 1                                                    | 1.3  | 1.2  | 1.2   |       |      |      | -1.6 | -1.6 | -1.4 | -1.4 | 1.8  | 1.8  |
| HCRT      | hypocretin (orexin) neuropeptide precursor                                                     | 1.3  |      |       |       |      |      |      |      |      |      |      |      |
| HDAC1     | histone deacetylase 1                                                                          | -1.4 | -1.4 | -1.2  |       | -1.2 |      |      |      |      |      | -1.5 | -1.5 |
| HDAC2     | histone deacetylase 2                                                                          | -1.3 |      | -1.5  | -1.5  | -1.5 | -1.5 | 1.3  |      | -1.5 | -1.5 | -1.6 | -1.6 |
| HDAC3     | histone deacetylase 3                                                                          | -1.3 |      |       |       |      |      | 1.5  | 1.5  | -1.4 |      |      |      |
| HDAC4     | histone deacetylase 4                                                                          | 1.2  |      |       |       |      |      | 2.6  | 2.6  | -1.8 | -1.8 | 1.3  | 1.3  |
| HDAC6     | histone deacetylase 6                                                                          |      | 1.2  |       |       |      |      |      |      | -1.3 |      | 1.4  | 1.4  |
| HDGF      | hepatoma-derived growth factor (high-mobility group protein 1-like)                            |      | -1.3 |       |       | 1.6  |      |      |      | -1.5 | -1.5 | -1.3 | -1.3 |
| HDLBP     | high density lipoprotein binding protein (vigilin)                                             |      |      |       |       | -1.3 |      | -1.7 | -1.7 | -1.6 | -1.6 |      |      |
| HEAB      | CLP1, cleavage and polyadenylation factor I subunit, homolog (S. cerevisiae)                   |      |      |       |       |      |      |      |      |      |      | -1.2 | -1.2 |
| HELZ      | helicase with zinc finger                                                                      | 1.2  | 1.4  |       |       |      |      | 1.5  | 1.5  |      |      | -1.3 | -1.3 |
| HERPUD1   | homocysteine-inducible, endoplasmic reticulum stress-inducible, ubiquitin-like domain member 1 | -1.4 |      |       |       | -1.6 |      | -2.1 | -2.1 |      |      | 2.1  | 2.1  |
| HES1      | hairly and enhancer of split 1, (Drosophila)                                                   | -5.5 | -5.5 | -12.8 | -12.8 | -9.3 | -9.3 |      |      |      |      | -3.1 |      |
| HEXA      | hexosaminidase A (alpha polypeptide)                                                           | 1.2  |      |       |       |      |      | 1.7  | 1.7  |      |      | -1.4 | -1.4 |
| HEXIM1    | hexamethylene bis-acetamide inducible 1                                                        | -1.4 | 1.5  |       |       | 1.6  |      | 4.5  | 4.5  | 1.8  | 1.8  | -2.2 | -2.2 |
| HGS       | hepatocyte growth factor-regulated tyrosine kinase substrate                                   |      | -1.5 | -1.5  |       |      |      | 1.5  | 1.5  |      |      | -1.7 | -1.7 |
| HHEX      | homeobox, hematopoietically expressed                                                          |      | 1.3  |       |       | -1.3 |      | 3.4  | 3.4  | -2.0 | -2.0 | -5.4 | -5.4 |
| HIF1A     | hypoxia-inducible factor 1, alpha subunit (basic helix-loop-helix transcription factor)        |      |      |       |       |      |      |      |      | 1.2  | 1.2  |      |      |
| HINT1     | histidine triad nucleotide binding protein 1                                                   |      |      |       |       |      |      | 1.3  | 1.3  | 1.4  | 1.4  |      |      |
| HIP1R     | huntingtin interacting protein 1 related                                                       |      |      |       |       |      |      | -1.5 | -1.5 | 2.3  | 2.3  | 1.6  | 1.6  |
| HIP2      | huntingtin interacting protein 2                                                               | -1.3 | 1.3  | 1.3   |       | -1.3 |      | -1.6 | -1.6 | -1.2 | -1.2 | -2.2 | -2.2 |
| HIPK1     | homeodomain interacting protein kinase 1                                                       | 1.6  | 1.6  | 2.2   | 2.2   |      |      | -1.2 |      | -1.5 | -1.5 | 1.6  | 1.3  |
| HIPK3     | homeodomain interacting protein kinase 3                                                       | 1.2  |      |       |       | 2.1  |      | 1.5  | 1.3  | 1.5  | 1.5  | 1.5  | 1.5  |
| HIRA      | HIR histone cell cycle regulation defective homolog A (S. cerevisiae)                          | -1.5 |      | -1.3  |       | -1.8 | -1.8 |      |      |      |      | -1.8 |      |
| HIRIP3    | HIRA interacting protein 3                                                                     |      |      |       |       |      |      | -1.3 |      | -1.2 |      | 1.4  |      |
| HISPPD2A  | histidine acid phosphatase domain containing 2A                                                |      |      |       |       |      |      | -3.1 | -3.1 | -1.3 |      | 2.5  | 2.5  |
| HIST1H2BJ | histone cluster 1, H2bj                                                                        | 1.4  |      |       |       |      |      |      |      |      |      |      |      |
| HIST1H3D  | histone cluster 1, H3d                                                                         | 1.2  |      |       |       |      |      |      |      |      |      |      |      |
| HIST1H4C  | histone cluster 1, H4c                                                                         |      |      | -1.6  |       |      |      | -1.3 |      |      |      |      |      |
| HIST2H2AA | histone cluster 2, H2aa3                                                                       |      | 2.1  | 2.1   | 1.2   |      |      | -2.0 | -2.0 | 1.3  |      | 2.9  | 2.9  |
| HIST2H2BE | histone cluster 2, H2be                                                                        |      |      |       | 1.8   |      |      |      |      | -2.3 |      |      |      |
| HIVEP1    | human immunodeficiency virus type I enhancer binding protein 1                                 | 1.4  |      |       |       |      |      | 1.4  | 1.4  | 2.4  | 2.4  | -1.5 | -1.5 |
| HIVEP2    | human immunodeficiency virus type I enhancer binding protein 2                                 | 1.3  | 1.5  | 1.5   |       | -1.5 |      | -6.5 | -6.5 | -1.3 |      | 10.1 | 10.1 |
| HK2       | hexokinase 2                                                                                   | -2.0 | -2.0 | -2.3  |       | 1.2  |      | 1.4  | 1.4  | -3.1 | -3.1 | -2.3 | -2.3 |
| HKE2      | prefoldin subunit 6                                                                            |      |      |       |       | -1.2 |      |      |      |      |      | -1.3 |      |
| HLA-A     | major histocompatibility complex, class I, A                                                   | 1.5  | 1.5  | 1.7   | 1.7   | 1.3  |      | -2.5 | -2.5 |      |      | 2.7  | 2.7  |
| HLA-B     | major histocompatibility complex, class I, B                                                   |      |      |       |       |      |      | -3.4 | -3.4 | 1.2  | 1.2  | 3.7  | 3.7  |
| HLA-DMB   | major histocompatibility complex, class II, DM beta                                            | 1.2  | 1.3  |       |       |      |      | -1.7 | -1.7 |      |      | 1.3  |      |
| HLA-DOB   | major histocompatibility complex, class II, DO beta                                            |      |      | -1.4  |       |      |      |      |      |      |      |      |      |
| HLA-DRB3  | major histocompatibility complex, class II, DR beta 3                                          |      |      |       |       | 1.4  |      |      |      |      |      |      |      |
| HLA-E     | major histocompatibility complex, class I, E                                                   | 1.3  |      |       |       |      |      | -1.3 | -1.3 | 2.6  | 2.6  | 1.5  | 1.5  |
| HLA-F     | major histocompatibility complex, class I, F                                                   | 1.3  |      |       |       |      |      | -3.0 | -3.0 | 2.2  | 2.2  | 4.7  | 4.7  |
| HLA-G     | HLA-G histocompatibility antigen, class I, G                                                   | 1.5  | 1.5  | 1.3   |       | 1.3  | 1.3  | -2.0 | -2.0 | 1.5  | 1.5  | 1.9  | 1.9  |
| HLXB9     | homeobox HB9                                                                                   |      |      |       |       |      |      |      |      |      |      |      |      |
| HMBS      | hydroxymethylbilane synthase                                                                   | -1.3 |      | -1.9  | -1.9  | -1.6 |      | -1.6 | -1.6 | -1.7 |      | -1.9 | -1.9 |
| HMG20B    | high-mobility group 20B                                                                        |      |      |       |       |      |      | 1.4  |      |      |      | 1.5  | 1.5  |
| HMGA1     | high mobility group AT-hook 1                                                                  |      |      | -1.7  |       |      |      | -1.7 |      | -1.6 | -1.6 | -1.6 | -1.6 |
| HMGB1     | high-mobility group box 1                                                                      |      |      |       |       |      |      | -3.0 | -3.0 | 1.4  |      | 1.9  | 1.9  |
| HMGB2     | high-mobility group box 2                                                                      |      |      |       |       |      |      | -1.2 |      | 1.3  | 1.3  | 1.5  | 1.5  |

|             |                                                                                          |      |      |      |      |      |      |       |       |      |       |       |       |
|-------------|------------------------------------------------------------------------------------------|------|------|------|------|------|------|-------|-------|------|-------|-------|-------|
| HMGB3       | high-mobility group box 3                                                                |      |      | 1.4  |      | 1.3  |      |       | 1.4   | 1.4  | -1.5  | -1.5  |       |
| HMGCR       | 3-hydroxy-3-methylglutaryl-Coenzyme A reductase                                          | -1.4 | -1.4 |      |      |      |      | -1.9  | -1.9  |      | 2.0   | 2.0   |       |
| HMGC51      | 3-hydroxy-3-methylglutaryl-Coenzyme A synthase 1 (soluble)                               | -2.3 | -2.3 | -3.5 | -3.5 | -1.5 | -1.5 | -3.5  | -3.5  | -1.5 | 2.4   | 2.4   |       |
| HMGC52      | 3-hydroxy-3-methylglutaryl-Coenzyme A synthase 2 (mitochondrial)                         |      |      | 1.3  | 1.3  |      |      |       |       |      |       |       |       |
| HMGN1       | high-mobility group nucleosome binding domain 1                                          |      |      |      |      |      |      |       |       |      | -1.6  | -1.6  |       |
| HMGN2       | high-mobility group nucleosomal binding domain 2                                         | -1.2 |      |      |      |      |      |       |       |      |       |       |       |
| HMGN3       | high mobility group nucleosomal binding domain 3                                         |      |      |      |      |      |      |       |       | 1.3  | 1.5   | 1.5   |       |
| HMMR        | hyaluronan-mediated motility receptor (RHAMM)                                            |      |      | 1.4  | 1.4  |      |      | -1.5  | -1.5  | 1.8  | 1.8   | 3.3   | 3.3   |
| HMOX2       | heme oxygenase (decycling) 2                                                             |      |      |      |      | -1.2 | -1.2 |       |       |      | 1.6   | 1.6   |       |
| HNRPA0      | heterogeneous nuclear ribonucleoprotein A0                                               |      |      |      |      |      |      | 1.5   | 1.5   |      | -1.5  | -1.5  |       |
| HNRPA1      | heterogeneous nuclear ribonucleoprotein A1                                               |      |      | -1.2 |      |      |      | 1.9   | 1.9   | 1.4  | 1.4   | -1.8  | -1.8  |
| HNRPA2B1    | heterogeneous nuclear ribonucleoprotein A2/B1                                            |      |      |      |      |      |      | 5.0   | 5.0   | 1.3  | -2.4  | -2.4  |       |
| HNRPA3      | heterogeneous nuclear ribonucleoprotein A3                                               |      |      |      |      | -1.4 |      | 1.8   | 1.8   | -1.4 | -1.4  | -2.4  | -2.4  |
| HNRPAB      | heterogeneous nuclear ribonucleoprotein A/B                                              | -1.5 | -1.5 | -1.8 | -1.8 | -1.4 | -1.4 | -1.4  | -1.4  | -1.6 | -1.6  | -1.8  | -1.8  |
| HNRPC       | heterogeneous nuclear ribonucleoprotein C (C1/C2)                                        | -1.2 |      |      |      |      |      | -1.2  | -1.2  | -1.5 | -1.5  | -1.9  | -1.9  |
| HNRPD       | heterogeneous nuclear ribonucleoprotein D (AU-rich element RNA binding protein 1, 37kDa) |      |      |      |      |      |      | 3.1   | 3.1   | 1.5  | -1.8  | -1.8  |       |
| HNRPDL      | heterogeneous nuclear ribonucleoprotein D-like                                           | -1.4 |      | -1.6 | -1.6 | -1.2 |      | 1.7   | 1.7   | -1.6 | -1.6  | -2.4  | -2.4  |
| HNRPF       | heterogeneous nuclear ribonucleoprotein F                                                |      |      | -1.2 |      |      |      | 1.3   | 1.3   | -1.3 | -2.5  | -2.5  |       |
| HNRPH1      | heterogeneous nuclear ribonucleoprotein H1 (H)                                           |      |      |      |      | -1.3 |      | -2.9  | -2.9  | 1.3  | 1.3   | 2.1   | 2.1   |
| HNRPH2      | heterogeneous nuclear ribonucleoprotein H2 (H')                                          | 1.3  |      | 1.3  |      |      |      |       |       | 1.5  | 1.5   |       |       |
| HNRPH3      | heterogeneous nuclear ribonucleoprotein H3 (2H9)                                         |      |      | -1.3 | -1.3 |      |      | -1.4  | -1.4  | 1.2  | -1.3  | -1.3  |       |
| HNRPK       | heterogeneous nuclear ribonucleoprotein K                                                |      |      |      |      |      |      |       |       | -1.4 | -1.4  |       |       |
| HNRPL       | heterogeneous nuclear ribonucleoprotein L                                                |      |      |      |      |      |      | -1.4  | -1.4  | -2.0 | -2.0  | 1.3   | 1.3   |
| HNRPM       | heterogeneous nuclear ribonucleoprotein M                                                |      |      |      |      |      |      | 1.8   | 1.8   | 1.8  | 1.8   | -2.2  | -2.2  |
| HNRPR       | heterogeneous nuclear ribonucleoprotein R                                                |      |      |      |      | -1.4 |      |       |       |      | -2.0  | -2.0  |       |
| HNRPU       | heterogeneous nuclear ribonucleoprotein U (scaffold attachment factor A)                 | -1.3 |      |      |      | -1.3 |      | -1.4  | -1.4  | -1.4 | -1.4  | -2.9  | -2.9  |
| HNRPUL1     | heterogeneous nuclear ribonucleoprotein U-like 1                                         |      |      |      |      |      |      | -1.4  | -1.4  |      | 3.4   | 3.4   |       |
| HOMER1      | homer homolog 1 (Drosophila)                                                             |      |      | -1.3 |      | -1.4 |      | -2.3  | -2.3  | -1.3 | -1.3  |       |       |
| HOM-TES-103 | hypothetical protein LOC25900                                                            | 1.2  |      | 1.4  | 1.4  |      |      |       |       | 2.3  | 2.3   | 1.6   | 1.4   |
| HOXA9       | homeobox A9                                                                              |      |      |      |      |      |      | -91.3 | -91.3 |      | 194.0 | 194.0 |       |
| HOXB6       | homeobox B6                                                                              |      |      |      |      | 1.6  |      | -1.4  |       | 1.5  | 1.8   |       |       |
| HOXB7       | homeobox B7                                                                              |      |      |      |      | 1.8  |      |       |       |      |       |       |       |
| HOXD4       | homeobox D4                                                                              |      |      | 1.2  |      |      |      |       |       |      |       |       |       |
| HPCAL1      | hippocalcin-like 1                                                                       | 1.3  | 1.3  | 1.4  |      | 1.7  |      | 1.3   |       |      | 1.5   | 1.3   |       |
| HPGD        | hydroxyprostaglandin dehydrogenase 15-(NAD)                                              | 1.3  | 1.3  | 1.5  |      |      |      |       |       | 2.6  | 2.6   |       |       |
| HPRP8BP     | --                                                                                       |      |      | -1.2 |      | -1.5 |      | -1.3  | -1.3  | -1.5 | -1.5  | -1.5  | -1.5  |
| HPRT1       | hypoxanthine phosphoribosyltransferase 1 (Lesch-Nyhan syndrome)                          |      |      | -1.3 | -1.3 | -1.5 |      |       |       | -1.6 | -1.6  |       |       |
| HPSS5       | Hermansky-Pudlak syndrome 5                                                              |      |      |      |      |      |      |       |       |      |       |       |       |
| HRAS        | v-Ha-ras Harvey rat sarcoma viral oncogene homolog                                       | -1.3 | -1.3 | -1.4 |      | -1.3 |      | -1.8  | -1.8  | 1.3  |       |       |       |
| HRB         | HIV-1 Rev binding protein                                                                |      |      |      |      |      |      | -1.7  | -1.7  | 1.5  | 1.5   | 3.8   | 3.8   |
| HRB2        | KRR1, small subunit (SSU) processome component, homolog (yeast)                          | -1.4 |      |      |      | -1.7 |      |       |       | -1.3 | -1.3  | -1.2  | -1.2  |
| HRMT1L2     | protein arginine methyltransferase 1                                                     | -1.5 |      | -2.2 | -2.2 | -1.7 | -1.7 | -1.2  | -1.2  | -2.6 | -2.6  | -2.6  | -2.6  |
| HRSP12      | heat-responsive protein 12                                                               |      |      |      |      | -1.4 |      |       |       | -2.0 | -2.0  | -2.7  | -2.7  |
| HS2ST1      | heparan sulfate 2-O-sulfotransferase 1                                                   |      |      |      |      |      |      | 1.8   | 1.8   | 1.5  | -1.4  | -1.4  |       |
| HS6ST1      | heparan sulfate 6-O-sulfotransferase 1                                                   | 1.3  |      | 2.1  | 2.1  | 2.2  | 2.2  | 1.3   | 1.3   | 1.8  | 1.8   | 1.5   | 1.5   |
| HSPB1       | heat shock factor binding protein 1                                                      |      |      |      |      |      |      | -1.4  | -1.4  | -1.3 | -1.3  |       |       |
| HSD17B4     | hydroxysteroid (17-beta) dehydrogenase 4                                                 |      |      | 1.9  | 1.9  | 1.9  |      | 2.0   | 2.0   | 1.9  | 1.9   | 2.0   | 2.0   |
| HSD17B8     | hydroxysteroid (17-beta) dehydrogenase 8                                                 |      |      | -1.2 |      |      |      |       |       |      |       |       |       |
| HSF1        | heat shock transcription factor 1                                                        |      |      |      |      |      |      | -1.4  |       | -1.2 |       | -1.5  | -1.5  |
| HSF2        | heat shock transcription factor 2                                                        |      |      |      |      |      |      | 1.2   | 1.2   |      |       |       |       |
| HSF4        | heat shock transcription factor 4                                                        |      |      |      |      | 1.8  |      |       |       |      |       |       |       |
| HSPA1A      | heat shock 70kDa protein 1A                                                              | -2.0 |      |      |      |      |      | 6.3   | 6.3   |      |       | -8.1  | -8.1  |
| HSPA4       | heat shock 70kDa protein 4                                                               |      |      |      |      | -1.6 | -1.6 | 1.3   |       | -1.4 | -1.4  | -1.8  | -1.8  |
| HSPA4L      | heat shock 70kDa protein 4-like                                                          |      |      | -1.6 |      | -1.6 |      | 25.8  | 25.8  |      |       | -42.0 | -42.0 |
| HSPA5       | heat shock 70kDa protein 5 (glucose-regulated protein, 78kDa)                            | -1.3 |      |      |      | -1.5 | -1.5 | 1.6   | 1.6   |      |       | -3.2  | -3.2  |
| HSPA8       | heat shock 70kDa protein 8                                                               | -1.3 | -1.3 |      |      | -1.9 | -1.9 |       |       | -1.3 | -1.3  |       |       |
| HSPA9B      | heat shock 70kDa protein 9 (mortalin)                                                    | -1.5 |      | -1.5 | -1.4 | -1.6 | -1.6 |       |       | -2.8 | -2.8  | -3.8  | -3.8  |
| HSPB1       | heat shock 27kDa protein 1                                                               |      |      |      |      |      |      | -2.7  | -2.7  | -1.3 | -1.3  | 1.6   | 1.6   |





|           |                                                                                                       |      |      |      |      |      |      |      |      |       |       |      |        |        |
|-----------|-------------------------------------------------------------------------------------------------------|------|------|------|------|------|------|------|------|-------|-------|------|--------|--------|
| ITGA4     | integrin, alpha 4 (antigen CD49D, alpha 4 subunit of VLA-4 receptor)                                  | -2.4 | -2.1 | -1.5 |      | -2.3 |      | -1.4 |      |       |       |      | -5.7   | -5.7   |
| ITGA6     | integrin, alpha 6                                                                                     | 5.0  | 5.0  | 10.2 | 10.2 | 3.5  | 2.4  | 6.1  | 6.1  | 7.2   | 7.2   |      | -1.9   | -1.9   |
| ITGAE     | integrin, alpha E (antigen CD103, human mucosal lymphocyte antigen 1; alpha polypeptide)              | 1.3  |      | 1.6  | 1.6  |      |      | -2.9 | -2.9 | 1.5   | 1.5   |      | 3.1    | 3.1    |
| ITGAL     | integrin, alpha L (antigen CD11A (p180), lymphocyte function-associated antigen 1; alpha polypeptide) |      |      | -1.6 | -1.6 |      |      | -1.7 | -1.7 | -1.4  | -1.4  |      | 1.4    |        |
| ITGB1     | integrin, beta 1 (fibronectin receptor, beta polypeptide, antigen CD29 includes MDF2, MSK12)          |      |      |      |      |      |      | 3.1  | 3.1  | 1.4   | 1.4   |      | -2.1   | -2.1   |
| ITGB1BP1  | integrin beta 1 binding protein 1                                                                     |      |      |      |      | -1.5 |      | -1.2 | -1.2 | 1.4   |       |      |        |        |
| ITGB2     | integrin, beta 2 (complement component 3 receptor 3 and 4 subunit)                                    |      |      |      |      |      |      | 2.6  | 2.6  | -5.6  | -5.6  |      | -8.7   | -8.7   |
| ITGB3BP   | integrin beta 3 binding protein (beta3-endonexin)                                                     | 1.2  |      |      |      | 1.4  |      |      |      | -1.2  | -1.2  |      | -1.7   | -1.7   |
| ITGB4BP   | integrin beta 4 binding protein                                                                       |      |      | -1.2 |      |      |      |      |      |       |       |      | -1.4   | -1.4   |
| ITK       | IL2-inducible T-cell kinase                                                                           | 1.5  | 1.5  | 1.7  | 1.7  |      |      |      |      |       |       |      |        |        |
| ITM1      | ITM1, subunit of the oligosaccharyltransferase complex, homolog A (S. cerevisiae)                     | -1.2 |      | -1.3 | -1.3 | -1.3 | -1.3 |      |      | -1.3  |       |      | -1.4   | -1.4   |
| ITM2A     | integral membrane protein 2A                                                                          |      |      | -1.4 |      |      |      | 64.4 | 64.4 |       |       |      | -138.3 | -138.3 |
| ITM2B     | integral membrane protein 2B                                                                          |      |      | 1.8  | 1.8  | 1.3  |      | 1.7  | 1.7  | 2.0   | 2.0   |      | 1.9    | 1.9    |
| ITPA      | inosine triphosphatase (nucleoside triphosphate pyrophosphatase)                                      |      |      | -1.3 | -1.3 |      |      |      |      |       |       |      |        |        |
| ITPK1     | inositol 1,3,4-triphosphate 5/6 kinase                                                                |      |      |      |      | -1.5 |      |      |      |       |       |      |        |        |
| ITPKB     | inositol 1,4,5-trisphosphate 3-kinase B                                                               |      |      |      |      |      |      | -4.6 | -4.6 |       |       |      | 1.7    | 1.7    |
| ITPR1     | inositol 1,4,5-triphosphate receptor, type 1                                                          | 1.9  |      | 2.7  | 2.7  |      |      | 3.8  | 3.8  | 3.5   | 2.4   |      | -18.1  | -18.1  |
| ITPR2     | inositol 1,4,5-triphosphate receptor, type 2                                                          | 1.5  | 1.5  | 1.7  | 1.7  | 1.5  | 1.5  | 4.3  | 4.3  | 1.8   | 1.8   |      | -2.4   | -2.4   |
| ITPR3     | inositol 1,4,5-triphosphate receptor, type 3                                                          |      |      | -1.6 | -1.6 | -1.4 | -1.3 |      |      |       |       |      |        |        |
| ITSN1     | intersectin 1 (SH3 domain protein)                                                                    |      |      |      |      |      |      | 1.2  |      | -3.8  | -3.8  | -1.3 | -1.3   | 8.7    |
| ITSN2     | intersectin 2                                                                                         |      |      |      |      |      |      |      |      | 1.3   |       | -1.5 | 1.4    | 1.4    |
| IVD       | isovaleryl Coenzyme A dehydrogenase                                                                   | 1.3  |      |      |      | 1.3  |      |      |      |       |       |      |        |        |
| IVNS1ABP  | influenza virus NS1A binding protein                                                                  | -1.3 |      | -1.4 |      |      |      | -1.3 | -1.3 | -1.3  | -1.3  |      | -1.9   | -1.9   |
| JAK1      | Janus kinase 1 (a protein tyrosine kinase)                                                            | 2.2  | 2.2  | 4.8  | 4.8  | 2.6  | 2.6  | 1.9  | 1.9  | 1.8   | 1.8   |      | 3.4    | 3.4    |
| JAK2      | Janus kinase 2 (a protein tyrosine kinase)                                                            |      |      | 2.8  | 2.8  |      |      | 1.6  | 1.6  | 2.3   | 2.3   |      | 1.8    | 1.5    |
| JAK3      | Janus kinase 3 (a protein tyrosine kinase, leukocyte)                                                 |      |      | 1.6  | 1.6  | 1.5  |      |      |      |       |       | -1.5 | -1.5   |        |
| JAM3      | junctional adhesion molecule 3                                                                        | 2.4  | 2.4  | 3.7  | 3.7  | 3.6  | 3.6  | 12.9 | 12.9 |       |       |      | -12.3  | -12.3  |
| JARID1A   | jumonji, AT rich interactive domain 1A                                                                | 1.3  |      | 1.7  | 1.7  |      |      | -2.3 | -2.3 | 1.2   | 1.2   |      | 3.7    | 3.7    |
| JARID1B   | jumonji, AT rich interactive domain 1B                                                                |      |      |      |      |      |      | 37.6 | 37.6 |       |       |      | -8.0   | -8.0   |
| JARID1C   | jumonji, AT rich interactive domain 1C                                                                |      |      |      |      |      |      | -1.2 |      | -1.3  |       |      | 1.3    | 1.3    |
| JARID2    | jumonji, AT rich interactive domain 2                                                                 | -1.3 | -1.3 |      |      | -1.3 |      | -1.4 | -1.4 |       |       |      | 1.9    | 1.9    |
| JMJD1A    | jumonji domain containing 1A                                                                          |      |      |      |      |      |      | 1.6  | 1.6  |       |       |      |        |        |
| JMJD1C    | jumonji domain containing 1C                                                                          |      |      | 1.9  |      |      |      | -2.0 | -2.0 | 1.9   | 1.9   |      | 3.6    | 3.6    |
| JRK       | jerky homolog (mouse)                                                                                 |      |      |      |      |      |      | 2.1  | 2.1  |       |       |      | -1.8   | -1.8   |
| JTV1      | JTV1 gene                                                                                             | -1.9 | -1.9 | -2.1 | -2.1 | -2.1 |      |      |      | -2.3  | -2.3  |      | -1.7   | -1.7   |
| JUN       | jun oncogene                                                                                          | 4.4  | 4.4  | 4.8  | 4.8  |      |      | 42.1 | 42.1 | 18.9  | 18.9  |      | -6.2   | -6.2   |
| JUNB      | jun B proto-oncogene                                                                                  |      |      |      |      | -1.4 |      |      |      |       |       |      | -1.8   | -1.8   |
| JUND      | jun D proto-oncogene                                                                                  |      |      |      |      |      |      | 1.3  | 1.3  | 1.8   | 1.8   |      | 1.4    | 1.4    |
| KAB       | centrosomal protein 170kDa                                                                            |      |      |      |      |      |      | 3.8  | 3.8  | 1.2   | 1.2   |      | -4.0   | -4.0   |
| K-ALPHA-1 | alpha tubulin                                                                                         |      |      |      |      |      |      |      |      |       |       |      |        |        |
| KARS      | lysyl-tRNA synthetase                                                                                 | -1.3 | -1.3 |      |      | -1.5 | -1.5 |      |      | -1.6  | -1.6  |      | -1.7   | -1.7   |
| KATNA1    | katanin p60 (ATPase-containing) subunit A 1                                                           |      |      |      |      |      |      | 1.2  |      | 1.5   | 1.5   |      |        |        |
| KATNB1    | katanin p80 (WD repeat containing) subunit B 1                                                        | -1.4 |      | -3.5 | -1.2 | -1.5 |      | -1.4 | -1.4 | -2.1  | -2.1  |      | -1.3   |        |
| KCNA5     | potassium voltage-gated channel, shaker-related subfamily, member 5                                   | 1.4  |      |      |      | 1.4  |      |      |      | 5.9   | 5.9   |      |        |        |
| KCNAB2    | potassium voltage-gated channel, shaker-related subfamily, beta member 2                              | 1.3  |      |      |      | 1.6  |      |      |      | -1.6  | -1.6  |      | 1.3    |        |
| KCNH2     | potassium voltage-gated channel, subfamily H (eag-related), member 2                                  |      |      |      |      |      |      |      |      |       |       |      |        |        |
| KCNN4     | potassium intermediate/small conductance calcium-activated channel, subfamily N, member 4             |      |      |      |      | -1.2 |      | 23.1 | 23.1 | -13.3 | -13.3 |      | -19.5  | -19.5  |
| KDEL1     | KDEL (Lys-Asp-Glu-Leu) endoplasmic reticulum protein retention receptor 1                             |      |      |      |      |      |      |      |      | -1.2  |       |      | 1.3    | 1.3    |
| KDEL2     | KDEL (Lys-Asp-Glu-Leu) endoplasmic reticulum protein retention receptor 2                             |      |      |      |      | 1.3  |      | 1.3  | 1.3  | -1.3  |       |      | -2.0   | -2.0   |
| KDR       | kinase insert domain receptor (a type III receptor tyrosine kinase)                                   | 1.3  |      |      |      |      |      |      |      | 1.3   |       |      |        |        |
| KEAP1     | kelch-like ECH-associated protein 1                                                                   |      |      |      |      |      |      | -1.4 | -1.4 |       |       |      |        |        |
| KHDRBS1   | KH domain containing, RNA binding, signal transduction associated 1                                   |      |      |      |      | -1.2 |      | -1.3 | -1.3 | -1.3  | -1.3  |      |        |        |
| KHDRBS3   | KH domain containing, RNA binding, signal transduction associated 3                                   |      |      |      |      | -1.3 |      | 9.0  | 9.0  | 2.3   | 2.3   |      | -14.3  | -14.3  |
| KHSRP     | KH-type splicing regulatory protein (FUSE binding protein 2)                                          |      |      | -1.4 | -1.4 | -1.4 | -1.4 |      |      | -2.3  | -2.3  |      | -2.2   | -2.2   |
| KIAA0020  | KIAA0020                                                                                              | -1.7 | -1.7 | -3.6 | -3.6 | -2.2 | -2.2 | -1.9 | -1.9 | -2.0  | -2.0  |      |        |        |
| KIAA0101  | KIAA0101                                                                                              |      |      |      |      |      |      |      |      | -1.9  | -1.9  |      | -3.2   | -3.2   |
| KIAA0133  | KIAA0133                                                                                              | -1.5 |      | -1.4 | -1.4 | -1.3 |      | -1.5 | -1.5 | -1.4  | -1.4  |      | -1.6   | -1.6   |
| KIAA0143  | KIAA0143 protein                                                                                      |      |      |      |      |      |      | 1.9  | 1.9  | 1.4   | 1.4   |      | -1.5   | -1.5   |



|           |                                                                                   |      |      |      |      |      |      |        |        |      |      |      |       |       |
|-----------|-----------------------------------------------------------------------------------|------|------|------|------|------|------|--------|--------|------|------|------|-------|-------|
| LAPTM5    | lysosomal associated multispanning membrane protein 5                             |      |      |      |      |      |      |        | -4.3   | -4.3 | 2.0  | 2.0  | 10.9  | 10.9  |
| LARP1     | La ribonucleoprotein domain family, member 1                                      | -1.4 |      | -1.7 |      | -1.9 |      |        |        |      | -2.0 | -2.0 | -2.2  | -2.2  |
| LARS2     | leucyl-tRNA synthetase 2, mitochondrial                                           |      |      |      |      |      |      |        | -1.2   | -1.2 | -1.5 | -1.5 | -1.4  | -1.4  |
| LAS1L     | LAS1-like (S. cerevisiae)                                                         |      |      | -1.3 |      | -1.4 | -1.4 |        |        |      |      |      | -2.0  | -2.0  |
| LASP1     | LIM and SH3 protein 1                                                             |      |      |      |      |      |      |        | 1.6    | 1.6  |      |      |       |       |
| LASS1     | LAG1 homolog, ceramide synthase 1 (S. cerevisiae)                                 |      |      |      |      | 1.6  |      |        |        |      |      |      |       |       |
| LAT       | linker for activation of T cells                                                  | 1.4  | 1.4  | 1.3  | 1.3  | 1.2  |      |        |        |      | 1.4  | 1.4  |       |       |
| LBR       | lamin B receptor                                                                  |      |      |      |      |      |      |        |        |      |      |      |       |       |
| LCK       | lymphocyte-specific protein tyrosine kinase                                       |      |      |      |      | -1.7 | -1.7 | -49.3  | -49.3  |      |      |      | 18.5  | 18.5  |
| LCP1      | lymphocyte cytosolic protein 1 (L-plastin)                                        |      |      |      |      | -1.3 |      | -4.1   | -4.1   | -2.5 | -2.5 |      | 7.2   | 7.2   |
| LCP2      | lymphocyte cytosolic protein 2 (SH2 domain containing leukocyte protein of 76kDa) |      |      |      |      | 1.5  |      | 1.6    | 1.6    | -2.4 | -2.4 |      | -2.2  | -2.2  |
| LCT       | lactase                                                                           | -1.4 |      | -1.4 |      | -2.4 |      |        |        |      |      |      |       |       |
| LDB1      | LIM domain binding 1                                                              |      |      | 1.3  | 1.3  |      |      | 1.7    | 1.7    | -1.2 | -1.2 |      | -1.5  | -1.5  |
| LDHA      | lactate dehydrogenase A                                                           |      |      | -1.4 |      |      |      |        |        |      |      |      | -1.7  | -1.7  |
| LDHB      | lactate dehydrogenase B                                                           |      |      |      |      |      |      |        |        |      |      | -1.6 | -1.6  |       |
| LDLR      | low density lipoprotein receptor (familial hypercholesterolemia)                  |      |      | -1.9 | -1.9 |      |      | -3.6   | -3.6   | -1.3 | -1.3 |      | 3.0   | 3.0   |
| LEF1      | lymphoid enhancer-binding factor 1                                                | 1.5  | 1.5  | 1.7  | 1.7  | 1.7  |      | -288.8 | -288.8 | -2.2 | -1.3 |      | 826.7 | 826.7 |
| LEPR      | leptin receptor                                                                   |      |      | 1.4  |      | 1.4  |      | 1.8    | 1.8    | 2.2  | 2.2  |      | 4.6   | 4.6   |
| LETMD1    | LETM1 domain containing 1                                                         | 1.2  |      |      |      | 1.2  |      | 3.1    | 3.1    |      |      |      | -7.5  | -7.5  |
| LGALS1    | lectin, galactoside-binding, soluble, 1 (galectin 1)                              | 1.6  |      | 1.7  | 1.7  | -1.3 |      | -22.2  | -22.2  | 2.9  | 2.9  |      | 82.1  | 82.1  |
| LGALS3BP  | lectin, galactoside-binding, soluble, 3 binding protein                           |      |      |      |      |      |      | -4.3   | -4.3   | -2.3 | -2.3 |      | 2.8   | 2.8   |
| LGALS9    | lectin, galactoside-binding, soluble, 9 (galectin 9)                              | -1.5 | -1.5 | -1.4 | -1.4 | -2.1 | -2.1 | 1.4    |        | -1.5 |      |      | -2.4  | -2.4  |
| LGMN      | legumain                                                                          | -1.6 | -1.6 | -1.8 | -1.8 | -1.4 |      |        |        |      |      |      |       |       |
| LIG1      | ligase I, DNA, ATP-dependent                                                      |      |      | -1.7 | -1.7 |      |      |        |        |      |      |      | -5.5  | -5.5  |
| LIG3      | ligase III, DNA, ATP-dependent                                                    |      |      | -1.4 | -1.4 |      |      |        |        |      |      |      | -1.4  | -1.4  |
| LIG4      | ligase IV, DNA, ATP-dependent                                                     | -1.4 |      | 1.5  |      | -1.6 |      | 1.9    | 1.9    | 1.8  | 1.8  |      |       |       |
| LIMK2     | LIM domain kinase 2                                                               | -1.4 | -1.4 | -2.6 | -2.6 | -1.6 | -1.6 |        |        |      |      |      |       |       |
| LIMS1     | LIM and senescent cell antigen-like domains 1                                     |      |      | -1.4 |      |      |      | 1.3    | 1.3    | 1.4  | 1.3  |      | 3.7   | 3.7   |
| LIPA      | lipase A, lysosomal acid, cholesterol esterase (Wolman disease)                   |      |      |      |      |      |      | 1.2    | 1.2    | -2.0 | -2.0 |      |       |       |
| LMAN1     | lectin, mannose-binding, 1                                                        | -1.5 | -1.5 |      |      | -1.5 |      | 2.1    | 1.6    |      |      |      | -15.2 | -15.2 |
| LMNB1     | lamin B1                                                                          |      |      | 1.3  |      | -1.2 |      | -2.0   | -2.0   |      |      |      | -1.2  |       |
| LMNB2     | lamin B2                                                                          |      |      | -1.4 | -1.4 |      |      |        |        |      |      |      | -1.5  | -1.5  |
| LMO2      | LIM domain only 2 (rhombotin-like 1)                                              | -1.7 |      | -2.0 | -2.0 |      |      | 7.9    | 7.9    | 4.4  | 4.4  |      | -6.9  | -6.9  |
| LMO4      | LIM domain only 4                                                                 |      |      | 1.5  |      |      |      | -3.8   | -3.8   | -1.3 |      |      | 1.9   | 1.9   |
| LNK       | SH2B adaptor protein 3                                                            |      |      |      |      |      |      | 1.3    | 1.3    | -1.2 | -1.2 |      | -2.8  | -2.8  |
| LNPEP     | leucyl/cystinyl aminopeptidase                                                    |      |      | 2.9  | 2.9  |      |      | -2.2   | -2.2   | -2.0 |      |      | 2.9   | 2.9   |
| LOC161527 | hypothetical protein LOC161527                                                    |      |      | -1.3 |      |      |      |        |        |      |      |      | 1.8   | 1.8   |
| LOC162427 | hypothetical protein LOC162427                                                    | 1.4  |      |      |      |      |      |        |        |      |      |      | 1.5   | 1.5   |
| LOC51035  | unknown protein LOC51035                                                          |      |      |      |      | 1.5  | 1.5  | 1.3    | 1.3    | 1.4  |      |      | 1.2   |       |
| LOC93081  | chromosome 13 open reading frame 27                                               |      |      | -1.4 | -1.4 | -1.4 |      | 2.0    | 2.0    |      |      |      | -1.4  | -1.4  |
| LPIN1     | lipin 1                                                                           | 1.3  | 1.3  | 1.3  |      |      |      | -1.6   | -1.6   |      |      |      | 2.3   | 2.3   |
| LPO       | lactoperoxidase                                                                   | 1.3  |      |      |      | 1.9  |      |        |        |      |      |      |       |       |
| LPXN      | leupaxin                                                                          |      |      |      |      |      |      | -3.2   | -3.2   | -1.7 | -1.7 |      | 1.7   | 1.7   |
| LRBA      | LPS-responsive vesicle trafficking, beach and anchor containing                   | 1.2  |      | 1.6  |      |      |      | 1.4    | 1.4    | -2.1 | -2.1 |      | -1.6  | -1.6  |
| LRCH4     | leucine-rich repeats and calponin homology (CH) domain containing 4               | 1.3  |      |      |      | 1.7  |      | -1.9   | -1.9   | 1.9  | 1.9  |      | 4.1   | 4.1   |
| LRMP      | lymphoid-restricted membrane protein                                              |      |      |      |      |      |      | -18.6  | -18.6  | -1.4 | -1.4 |      | 7.8   | 7.8   |
| LRP4      | low density lipoprotein receptor-related protein 4                                |      |      |      |      | -1.4 |      |        |        |      |      |      | -16.6 | -16.6 |
| LRP8      | low density lipoprotein receptor-related protein 8, apolipoprotein e receptor     | -2.2 | -2.2 | -3.6 |      | -2.8 | -2.8 | -1.6   | -1.6   | -2.1 | -2.1 |      | -2.6  | -2.5  |
| LRPAP1    | low density lipoprotein receptor-related protein associated protein 1             |      |      | 1.3  |      |      |      | 3.2    | 3.2    |      |      |      | -2.1  | -2.1  |
| LRPPRC    | leucine-rich PPR-motif containing                                                 | -1.8 | -1.8 | -1.4 | -1.4 | -1.7 | -1.7 | 1.7    | 1.7    | -5.1 | -5.1 |      | -2.8  | -2.8  |
| LRRFIP1   | leucine rich repeat (in FLII) interacting protein 1                               |      |      |      |      | -1.4 |      | -6.0   | -6.0   | 2.5  | 2.5  |      | 11.3  | 11.3  |
| LSM1      | LSM1 homolog, U6 small nuclear RNA associated (S. cerevisiae)                     |      |      |      |      |      |      | 2.2    | 2.2    |      |      |      | -1.6  |       |
| LSM2      | LSM2 homolog, U6 small nuclear RNA associated (S. cerevisiae)                     |      |      | -1.2 |      | -1.2 |      |        |        |      |      |      | 1.3   | -1.3  |
| LSM3      | LSM3 homolog, U6 small nuclear RNA associated (S. cerevisiae)                     |      |      |      |      |      |      | -1.3   |        |      |      |      |       |       |
| LSM4      | LSM4 homolog, U6 small nuclear RNA associated (S. cerevisiae)                     | 1.3  |      | -1.3 |      |      |      | -1.6   | -1.6   | -1.4 | -1.4 |      | -1.9  | -1.9  |
| LSM5      | LSM5 homolog, U6 small nuclear RNA associated (S. cerevisiae)                     |      |      |      |      |      |      | 2.9    | 2.9    | 1.3  |      |      | -4.5  | -4.5  |
| LSM6      | LSM6 homolog, U6 small nuclear RNA associated (S. cerevisiae)                     |      |      | -1.3 |      | -1.5 |      | -1.5   |        | -1.4 | -1.4 |      | 2.2   | 2.2   |
| LSM7      | LSM7 homolog, U6 small nuclear RNA associated (S. cerevisiae)                     | -1.2 |      | -1.4 | -1.4 | -1.4 |      | -1.5   | -1.5   | -1.5 | -1.5 |      | -1.4  | -1.4  |



|          |                                                                                      |      |      |      |      |      |      |      |      |       |       |       |       |
|----------|--------------------------------------------------------------------------------------|------|------|------|------|------|------|------|------|-------|-------|-------|-------|
| MAPKAPK2 | mitogen-activated protein kinase-activated protein kinase 2                          | 1.3  | 1.3  | 1.5  | 1.3  | 1.5  |      |      | 1.5  | 1.5   | 1.4   | 1.3   |       |
| MAPKAPK3 | mitogen-activated protein kinase-activated protein kinase 3                          | -1.4 | -1.4 | -1.6 | -1.6 | -1.5 |      | 10.5 | 10.5 | -1.5  | -1.5  | -20.4 | -20.4 |
| MAPKAPK5 | mitogen-activated protein kinase-activated protein kinase 5                          |      |      | -1.6 |      | -1.3 |      | -1.6 | -1.6 |       |       | -1.4  |       |
| MAPRE1   | microtubule-associated protein, RP/EB family, member 1                               |      |      | 1.3  | 1.3  |      |      | -1.4 | -1.4 | 1.5   | 1.5   | 1.6   | 1.6   |
| MAPRE2   | microtubule-associated protein, RP/EB family, member 2                               | 1.4  |      | 1.4  |      |      |      | -3.4 | -3.4 | -2.5  | -2.5  | 3.0   | 3.0   |
| MARCH7   | membrane-associated ring finger (C3HC4) 7                                            | 1.3  |      |      |      |      |      | 2.3  | 2.3  | 2.1   | 2.1   | 1.2   |       |
| MARCKSL1 | MARCKS-like 1                                                                        | -1.2 |      | -1.4 |      | -1.6 | -1.6 | -1.6 | -1.6 | -1.4  | -1.4  |       |       |
| MARK3    | MAP/microtubule affinity-regulating kinase 3                                         |      |      |      |      |      |      | 1.5  | 1.5  | 1.3   |       | -1.3  |       |
| MARS     | methionine-tRNA synthetase                                                           | -1.5 |      | -1.6 | -1.6 | -1.5 |      | -1.5 | -1.5 | -2.2  | -2.2  | -2.2  | -2.2  |
| MAT2A    | methionine adenosyltransferase II, alpha                                             | -1.8 |      |      |      |      |      | -1.4 |      |       |       |       |       |
| MATR3    | matrin 3                                                                             |      |      |      |      | -1.5 |      | 1.8  |      | -14.6 | -14.6 | -10.9 | -10.9 |
| MAX      | MYC associated factor X                                                              |      |      | 1.5  |      |      |      | -1.2 | -1.2 | -1.7  | -1.7  |       |       |
| MAZ      | MYC-associated zinc finger protein (purine-binding transcription factor)             | -1.5 |      | -1.8 |      |      |      | -3.2 | -3.2 | -1.7  | -1.7  | 1.7   | 1.7   |
| MB       | myoglobin                                                                            |      |      |      |      | 24.0 | 24.0 |      |      |       |       |       |       |
| MBD1     | methyl-CpG binding domain protein 1                                                  | 1.2  |      |      |      |      |      | -1.4 | 1.3  | -1.2  |       | -1.8  | -1.8  |
| MBD2     | methyl-CpG binding domain protein 2                                                  |      |      |      |      | -1.4 |      | -1.6 | -1.6 |       |       | 1.4   | 1.3   |
| MBD3     | methyl-CpG binding domain protein 3                                                  |      |      | -1.3 |      |      |      | -1.6 | -1.6 | -2.7  | -1.4  | -1.7  |       |
| MBD4     | methyl-CpG binding domain protein 4                                                  | 1.2  |      |      |      |      |      | 1.7  | 1.7  |       |       | -2.2  | -2.2  |
| MBNL1    | muscleblind-like (Drosophila)                                                        |      |      |      |      | -1.3 |      | -4.4 | -4.4 | 2.0   | 2.0   | 9.2   | 9.2   |
| MBTPS1   | membrane-bound transcription factor peptidase, site 1                                |      |      |      |      | -1.2 |      | 1.2  |      |       |       | -1.6  | -1.6  |
| MC2R     | melanocortin 2 receptor (adrenocorticotrophic hormone)                               |      |      |      |      |      |      |      |      |       |       |       |       |
| MC5R     | melanocortin 5 receptor                                                              |      |      | 1.4  | 1.4  |      |      |      |      |       |       |       |       |
| MCCC2    | methylcrotonoyl-Coenzyme A carboxylase 2 (beta)                                      | -1.2 |      |      |      |      |      | 1.4  | 1.4  | -1.5  | -1.5  | -2.1  | -2.1  |
| MCFD2    | multiple coagulation factor deficiency 2                                             |      |      |      |      |      |      | 1.6  | 1.6  |       |       | -1.7  | -1.7  |
| MCL1     | myeloid cell leukemia sequence 1 (BCL2-related)                                      | 1.2  | 1.2  | 1.5  |      |      |      | 1.4  | 1.4  | 1.7   | 1.7   | 1.3   | 1.3   |
| MCM2     | MCM2 minichromosome maintenance deficient 2, mitotin (S. cerevisiae)                 |      |      | -1.3 | -1.3 | -1.2 |      |      |      | -3.1  | -3.1  | -4.2  | -4.2  |
| MCM3     | MCM3 minichromosome maintenance deficient 3 (S. cerevisiae)                          |      |      |      |      | -1.3 | -1.3 | -1.4 | -1.4 | -3.1  | -3.1  | -4.2  | -4.2  |
| MCM3AP   | MCM3 minichromosome maintenance deficient 3 (S. cerevisiae) associated protein       | 1.3  | 1.3  |      |      |      |      |      |      |       |       | 1.9   | 1.9   |
| MCM4     | MCM4 minichromosome maintenance deficient 4 (S. cerevisiae)                          |      |      |      |      | -1.5 |      | -2.1 | -2.1 | -3.3  | -3.3  | -6.9  | -6.9  |
| MCM5     | MCM5 minichromosome maintenance deficient 5, cell division cycle 46 (S. cerevisiae)  |      |      |      |      |      |      | -1.5 | -1.5 | -1.5  | -1.5  | -3.2  | -3.2  |
| MCM6     | minichromosome maintenance deficient 6 homolog (S. cerevisiae)                       |      |      | -1.3 | -1.3 | -1.4 |      | 1.3  | 1.3  | -2.1  | -2.1  | -6.8  | -6.8  |
| MCM7     | MCM7 minichromosome maintenance deficient 7 (S. cerevisiae)                          | -1.2 |      | -1.4 | -1.4 |      |      | -1.9 | -1.9 | -1.3  | -1.3  | -2.7  | -2.7  |
| MCP      | CD46 molecule, complement regulatory protein                                         |      |      |      |      | -1.3 |      | 1.6  | 1.6  | 1.4   | 1.4   |       |       |
| MCRS1    | microspherule protein 1                                                              |      |      |      |      |      |      | -1.7 | -1.7 |       |       |       |       |
| MDC1     | mediator of DNA damage checkpoint 1                                                  |      |      | 1.2  | 1.2  |      |      | -4.7 | -4.7 |       |       | 2.0   | 2.0   |
| MDFIC    | MyoD family inhibitor domain containing                                              |      |      | 1.3  |      |      |      | -3.1 | -3.1 | 1.3   |       | 2.4   | 2.4   |
| MDH1     | malate dehydrogenase 1, NAD (soluble)                                                |      |      |      |      |      |      | 1.9  | 1.9  | -1.3  | -1.3  | -2.2  | -2.2  |
| MDH2     | malate dehydrogenase 2, NAD (mitochondrial)                                          |      |      |      |      | -1.4 |      | -2.3 | -2.3 | -1.5  | -1.5  | 3.7   | 3.7   |
| MDM4     | Mdm4, transformed 3T3 cell double minute 4, p53 binding protein (mouse)              |      |      | 1.6  |      | 1.5  |      | -2.4 | -2.4 | 2.2   | 2.2   | 2.5   | 2.5   |
| ME2      | malic enzyme 2, NAD(+)-dependent, mitochondrial                                      | -1.5 |      | -1.4 |      | -1.8 | -1.8 | 1.2  |      | -1.6  | -1.6  | -2.2  | -2.2  |
| MECP2    | methyl CpG binding protein 2 (Rett syndrome)                                         | 1.3  |      | 1.3  |      |      |      |      |      |       |       |       |       |
| MED12    | mediator of RNA polymerase II transcription, subunit 12 homolog (S. cerevisiae)      |      |      |      |      |      |      | 1.4  | 1.4  |       |       |       |       |
| MED6     | mediator of RNA polymerase II transcription, subunit 6 homolog (S. cerevisiae)       | 1.2  |      | 1.4  |      | -1.3 |      | -1.4 | -1.4 |       |       | 1.3   |       |
| MED8     | mediator of RNA polymerase II transcription, subunit 8 homolog (S. cerevisiae)       |      |      |      |      | 1.3  |      | 1.7  | 1.7  | -1.7  |       | -1.2  |       |
| MEF2A    | MADS box transcription enhancer factor 2, polypeptide A (myocyte enhancer factor 2A) |      |      |      |      | -1.3 |      | -3.6 | -3.6 | 1.7   | 1.7   | 11.0  | 11.0  |
| MEF2C    | MADS box transcription enhancer factor 2, polypeptide C (myocyte enhancer factor 2C) | -1.6 |      | -1.6 |      |      |      | -3.5 | -3.5 | 1.6   | -1.5  | 3.6   | 3.6   |
| MEF2D    | MADS box transcription enhancer factor 2, polypeptide D (myocyte enhancer factor 2D) |      |      |      |      |      |      | -5.7 | -5.7 | 1.8   |       | 2.0   | 2.0   |
| MEIS2    | Meis1, myeloid ecotropic viral integration site 1 homolog 2 (mouse)                  | 1.4  |      |      |      | -1.5 |      | 3.6  | 3.6  | -2.1  | -2.1  | -4.4  | -4.4  |
| MELK     | maternal embryonic leucine zipper kinase                                             | 1.4  | 1.4  |      |      | -1.3 |      | -1.3 | -1.3 | 1.4   | 1.4   |       |       |
| MEN1     | multiple endocrine neoplasia I                                                       |      |      | -1.4 | -1.4 |      |      | 1.3  | 1.3  | -1.5  | -1.5  | -1.3  | -1.3  |
| MEOX2    | mesenchyme homeobox 2                                                                |      |      |      |      |      |      |      |      |       |       |       |       |
| MEP50    | WD repeat domain 77                                                                  | -1.7 | -1.7 | -1.4 | -1.4 | -1.8 |      | -1.8 | -1.8 | -1.5  | -1.5  | -1.4  | -1.4  |
| METAP2   | methionyl aminopeptidase 2                                                           |      |      |      |      |      |      |      |      |       |       |       |       |
| METAP2   | --                                                                                   | -1.2 |      |      |      |      |      | 1.4  | 1.4  | -1.3  | -1.3  | -1.7  | -1.7  |
| METTL1   | methyltransferase like 1                                                             | -1.3 | -1.3 |      |      |      |      |      |      |       |       |       |       |
| MFAP1    | microfibrillar-associated protein 1                                                  | 1.2  |      | 1.2  | 1.2  |      |      | -1.6 | -1.6 | -1.4  | -1.4  |       |       |
| MFAP4    | microfibrillar-associated protein 4                                                  |      |      |      |      | 2.2  |      |      |      |       |       |       |       |
| MFGE8    | milk fat globule-EGF factor 8 protein                                                | 1.3  |      | 2.3  | 2.3  | 1.3  |      | -1.5 |      | 1.7   |       |       |       |

|           |                                                                                                 |      |      |      |      |      |      |      |      |      |      |      |       |       |
|-----------|-------------------------------------------------------------------------------------------------|------|------|------|------|------|------|------|------|------|------|------|-------|-------|
| MFHAS1    | malignant fibrous histiocytoma amplified sequence 1                                             |      |      |      | 1.3  |      | -1.2 |      | 1.9  |      | -1.5 | -1.5 | -4.1  | -4.1  |
| MFN1      | mitofusin 1                                                                                     |      |      |      | 1.4  | 1.4  |      |      | 1.7  |      |      |      | 1.9   | 1.9   |
| MFN2      | mitofusin 2                                                                                     |      |      |      |      |      | -1.2 |      |      |      | 1.6  |      | -1.6  | -1.6  |
| MFNG      | MFNG O-fucosylpeptide 3-beta-N-acetylglucosaminyltransferase                                    |      |      |      | -1.3 | -1.3 |      |      | 3.0  | 3.0  | -1.8 | -1.8 | -9.2  | -9.2  |
| MGA       | MAX gene associated                                                                             |      |      |      | -1.3 |      | -1.2 |      | 3.0  | 3.0  | -1.8 | -1.8 | -7.2  | -7.2  |
| MGAT1     | mannosyl (alpha-1,3)-glycoprotein beta-1,2-N-acetylglucosaminyltransferase                      |      |      |      |      |      | 1.2  |      | -1.3 |      |      |      |       |       |
| MGC17330  | HGFL gene                                                                                       | 7.3  | 7.3  | 6.8  | 6.8  | 5.5  | 5.5  | 34.8 | 34.8 | 7.3  | 7.3  | 12.3 | 12.3  | 12.3  |
| MGC5508   | transmembrane protein 109                                                                       | -1.4 | -1.4 | -1.5 | -1.5 | -1.6 | -1.6 | -1.4 | -1.4 | -1.7 | -1.7 | -1.5 | -1.5  | -1.5  |
| MGEA5     | meningioma expressed antigen 5 (hyaluronidase)                                                  |      |      |      | 1.6  |      | 1.5  |      | 1.7  | 1.7  | 1.3  | 1.3  | 1.9   | 1.9   |
| MGMT      | O-6-methylguanine-DNA methyltransferase                                                         |      |      |      |      |      |      |      |      |      | -1.9 | -1.9 |       |       |
| MIB1      | mindbomb homolog 1 (Drosophila)                                                                 |      |      |      |      |      | 1.2  |      | 4.1  | 4.1  | 1.2  |      | -7.8  | -7.8  |
| MICB      | MHC class I polypeptide-related sequence B                                                      |      |      |      |      |      | -1.3 |      | -1.4 | -1.4 |      |      |       |       |
| MIF       | macrophage migration inhibitory factor (glycosylation-inhibiting factor)                        | -1.2 |      |      |      |      |      |      |      |      | -1.9 | -1.9 | -2.6  | -2.6  |
| MINA      | MYC induced nuclear antigen                                                                     |      |      | -1.7 |      |      |      | -1.2 | -1.2 | -1.7 | -1.7 | -1.9 | -1.9  | -1.9  |
| MINPP1    | multiple inositol polyphosphate histidine phosphatase, 1                                        | 1.2  |      | 1.4  |      |      |      | 1.6  | 1.6  |      |      |      | -1.7  | -1.7  |
| MIPEP     | mitochondrial intermediate peptidase                                                            |      |      |      |      |      |      |      |      |      |      |      |       |       |
| MIR16     | membrane interacting protein of RGS16                                                           |      |      | 1.3  |      |      | -1.3 |      | 2.1  | 2.1  | -1.4 | -1.4 | -2.9  | -2.9  |
| MIZF      | MBD2-interacting zinc finger                                                                    |      |      |      |      |      |      |      |      |      |      |      |       |       |
| MKI67     | antigen identified by monoclonal antibody Ki-67                                                 | 1.3  |      | 1.3  |      |      |      | -2.2 | -2.2 | 2.1  | 2.1  | 2.2  | 2.2   | 2.2   |
| MKL1      | megakaryoblastic leukemia (translocation) 1                                                     | 1.4  |      | 1.4  | 1.4  |      |      | 1.5  | 1.5  | -1.5 | -1.5 | -1.6 | -1.6  | -1.6  |
| MKMK1     | MAP kinase interacting serine/threonine kinase 1                                                | 1.4  |      | 1.3  |      | 1.9  | 1.9  | 1.7  | 1.3  |      |      | 1.3  | 1.3   | 1.3   |
| MKRN1     | makorin, ring finger protein, 1                                                                 | 1.2  |      |      |      |      |      | -1.5 | -1.5 |      |      | 2.1  | 2.1   | 2.1   |
| MLC1      | megalencephalic leukoencephalopathy with subcortical cysts 1                                    |      |      |      |      |      | -1.5 | -1.5 | 1.7  | 1.7  |      |      | -5.1  | -5.1  |
| MLF2      | myeloid leukemia factor 2                                                                       | -1.3 |      |      |      |      |      |      |      |      |      |      |       |       |
| MLH1      | mutL homolog 1, colon cancer, nonpolyposis type 2 (E. coli)                                     |      |      |      |      |      |      |      |      |      | -1.6 | -1.6 | -1.5  | -1.5  |
| MLH3      | mutL homolog 3 (E. coli)                                                                        | -1.4 |      |      |      |      | -1.4 |      | 2.2  | 2.2  | -1.3 | -1.3 | -2.4  | -2.4  |
| MLL       | myeloid/lymphoid or mixed-lineage leukemia (trithorax homolog, Drosophila)                      |      |      |      |      |      |      | 1.8  | 1.8  | -1.8 | -1.8 | 2.0  | 2.0   | 2.0   |
| MLL4      | myeloid/lymphoid or mixed-lineage leukemia 4                                                    | 1.2  |      |      |      |      |      |      |      |      |      |      |       |       |
| MLLT10    | myeloid/lymphoid or mixed-lineage leukemia (trithorax homolog, Drosophila); translocated to, 10 |      |      |      |      |      | -1.7 |      | 2.7  | 2.7  | 1.2  |      | -2.7  | -2.2  |
| MLLT7     | myeloid/lymphoid or mixed-lineage leukemia (trithorax homolog, Drosophila); translocated to, 7  |      |      |      |      |      | 5.6  | 5.6  |      |      |      |      |       |       |
| MLX       | MAX-like protein X                                                                              | -1.3 | -1.3 | -1.2 |      |      | -1.5 |      | 1.2  |      |      |      |       |       |
| MMD       | monocyte to macrophage differentiation-associated                                               |      |      | -1.3 |      |      | -1.3 |      |      |      | -2.6 | -2.6 | -2.7  | -2.7  |
| MME       | membrane metallo-endopeptidase (neutral endopeptidase, enkephalinase)                           | 1.4  | 1.4  |      |      |      | 1.6  |      |      |      | -1.3 | -1.3 |       |       |
| MMP11     | matrix metalloproteinase 11 (stromelysin 3)                                                     | 1.3  |      |      |      |      |      |      |      |      |      |      |       |       |
| MMP14     | matrix metalloproteinase 14 (membrane-inserted)                                                 |      |      |      |      |      | 1.7  |      |      |      | -1.3 | -1.3 |       |       |
| MMP25     | matrix metalloproteinase 25                                                                     |      |      |      |      |      |      |      |      |      |      |      |       |       |
| MMS19L    | MMS19-like (MET18 homolog, S. cerevisiae)                                                       |      |      |      |      |      | -1.3 | -1.3 | 1.7  | 1.7  |      |      | -1.4  | -1.4  |
| MNAT1     | menage a trois homolog 1, cyclin H assembly factor (Xenopus laevis)                             | -1.4 |      | 1.2  |      |      | -1.5 | -1.5 |      |      |      |      |       |       |
| MNT       | MAX binding protein                                                                             | -1.5 |      | -1.5 | -1.5 | -1.6 |      |      | -1.5 | -1.5 |      |      |       |       |
| MOAP1     | modulator of apoptosis 1                                                                        | 1.9  | 1.9  | 1.4  |      |      |      |      |      |      | 1.5  | 1.5  | 1.5   | 1.5   |
| MOBK1B    | MOB1, Mps One Binder kinase activator-like 1B (yeast)                                           |      |      |      |      |      |      |      | -1.6 | -1.6 | -1.2 |      | 1.4   | 1.4   |
| MONDOA    | MLX interacting protein                                                                         | 1.3  |      | 1.4  |      |      |      |      | 1.5  | 1.5  | 1.7  | 1.7  | -1.2  |       |
| MORF4L2   | mortality factor 4 like 2                                                                       |      |      |      |      |      |      |      | 1.5  | 1.2  |      |      |       |       |
| MPG       | N-methylpurine-DNA glycosylase                                                                  |      |      |      |      |      |      |      | -4.1 | -4.1 |      |      | 4.1   | 4.1   |
| MPHOSPH1  | M-phase phosphoprotein 1                                                                        |      |      |      |      |      |      |      | 1.9  | 1.9  |      |      | -3.2  | -3.2  |
| MPHOSPH10 | M-phase phosphoprotein 10 (U3 small nucleolar ribonucleoprotein)                                | -1.4 |      | -1.5 | -1.5 | -1.5 |      |      |      |      | -1.3 | -1.3 | -1.3  | -1.3  |
| MPHOSPH6  | M-phase phosphoprotein 6                                                                        | -1.2 |      |      |      |      | -1.4 |      | -1.5 | -1.3 | -1.9 | -1.9 | -2.3  | -2.3  |
| MPHOSPH9  | M-phase phosphoprotein 9                                                                        | 1.4  |      |      |      |      |      |      | 1.2  |      | -1.3 | -1.3 | -1.4  | -1.4  |
| MPI       | mannose phosphate isomerase                                                                     | -1.3 | -1.3 | -1.7 | -1.7 | -1.4 |      |      |      |      |      |      |       |       |
| MPP1      | membrane protein, palmitoylated 1, 55kDa                                                        | 1.4  |      |      |      | 1.3  |      |      | -1.9 | -1.9 | -1.3 | -1.3 |       |       |
| MPP2      | membrane protein, palmitoylated 2 (MAGUK p55 subfamily member 2)                                |      |      | -1.2 |      | 1.5  |      |      |      |      |      |      |       |       |
| MPP6      | membrane protein, palmitoylated 6 (MAGUK p55 subfamily member 6)                                | -1.6 |      | -1.2 |      | -1.7 |      |      | 38.6 | 38.6 |      |      | -21.9 | -21.9 |
| MPST      | mercaptopyruvate sulfurtransferase                                                              | -1.4 |      |      |      |      |      |      |      |      | 1.3  | 1.3  |       |       |
| MPV17     | MpV17 mitochondrial inner membrane protein                                                      |      |      |      |      |      |      |      |      |      | -1.4 | -1.4 | -1.9  | -1.9  |
| MPZ       | myelin protein zero (Charcot-Marie-Tooth neuropathy 1B)                                         |      |      | 1.2  |      |      |      |      |      |      |      |      |       |       |
| MPZL1     | myelin protein zero-like 1                                                                      |      |      | 1.7  |      | 1.4  |      |      | -7.5 | -7.5 | -1.8 | -1.8 | 9.8   | 9.8   |
| MR1       | major histocompatibility complex, class I-related                                               | 1.2  |      |      |      | 1.4  |      |      | -1.9 |      |      |      | 3.5   | 3.5   |
| MRC2      | mannose receptor, C type 2                                                                      |      |      |      |      |      |      |      | 2.0  | 2.0  |      |      | -8.0  | -8.0  |

|        |                                                                                                                                       |      |      |      |      |      |      |      |      |      |      |      |      |      |      |      |
|--------|---------------------------------------------------------------------------------------------------------------------------------------|------|------|------|------|------|------|------|------|------|------|------|------|------|------|------|
| MRCL3  | myosin regulatory light chain MRCL3                                                                                                   |      |      |      | 1.4  | 1.4  |      |      |      | -2.0 | -2.0 | 2.2  | 2.2  |      | 5.8  | 5.8  |
| MRE11A | MRE11 meiotic recombination 11 homolog A (S. cerevisiae)                                                                              |      |      |      | 1.4  |      |      |      |      | -1.3 |      |      |      |      | -1.7 | -1.7 |
| M-RIP  | myosin phosphatase-Rho interacting protein                                                                                            |      |      |      |      |      |      |      |      | -5.4 | -5.4 | 1.2  | 1.2  |      | 26.4 | 26.4 |
| MRLC2  | myosin regulatory light chain MRLC2                                                                                                   |      |      |      |      |      |      |      |      |      |      |      |      |      |      |      |
| MRPL12 | mitochondrial ribosomal protein L12                                                                                                   | -1.3 |      |      | -2.0 | -2.0 |      |      |      |      |      | -1.7 | -1.7 |      | -3.2 | -3.2 |
| MRPS12 | mitochondrial ribosomal protein S12                                                                                                   | -1.4 | -1.4 |      | -1.3 | -1.2 | -2.0 | -1.7 | -1.5 | -1.5 |      |      |      |      | -2.0 | -1.7 |
| MRPS27 | mitochondrial ribosomal protein S27                                                                                                   |      |      |      |      |      |      |      |      |      |      | -1.5 | -1.5 |      | -1.5 | -1.5 |
| MSC    | musculin (activated B-cell factor-1)                                                                                                  |      |      |      |      |      |      |      |      |      |      |      |      |      |      |      |
| MSH2   | mutS homolog 2, colon cancer, nonpolyposis type 1 (E. coli)                                                                           |      |      |      | -1.3 | -1.3 | -1.5 | -1.5 | -1.5 | -1.5 | -1.6 | -1.6 | -1.6 | -1.6 | -1.8 | -1.8 |
| MSH3   | mutS homolog 3 (E. coli)                                                                                                              | 1.3  |      |      |      |      |      |      |      | -1.3 |      | -1.5 | -1.5 |      | 1.7  | 1.7  |
| MSH6   | mutS homolog 6 (E. coli)                                                                                                              | 1.5  | -1.2 |      | -1.3 |      | -1.7 | -1.7 | -2.5 | -2.5 | -2.7 | -2.7 | -2.7 | -2.7 | -2.4 | -2.4 |
| MSN    | moesin                                                                                                                                | 1.2  |      |      | 1.3  |      | 1.2  |      |      | 1.4  | 1.4  | 1.4  | 1.2  |      | 1.7  | 1.7  |
| MST1   | macrophage stimulating 1 (hepatocyte growth factor-like)                                                                              | 1.4  |      |      |      |      |      |      |      |      |      |      |      |      |      |      |
| MSX1   | msh homeobox 1                                                                                                                        | 1.5  | 1.5  |      |      |      | 1.3  |      |      | -1.4 |      | -1.6 | -1.6 |      | -1.4 | -1.4 |
| MT1A   | metallothionein 1A (functional)                                                                                                       | 1.3  |      |      | 1.3  | 1.3  | 2.2  |      |      |      |      |      |      |      |      |      |
| MT1B   | metallothionein 1B (functional)                                                                                                       | 1.3  |      |      | 1.5  | 1.5  | 1.6  |      |      |      |      |      |      |      |      |      |
| MT1E   | metallothionein 1E (functional)                                                                                                       |      |      |      | 1.9  | 1.9  | 2.1  | 2.1  | 1.8  | 1.8  | 2.3  | 2.3  |      | 1.3  |      |      |
| MT1G   | metallothionein 1G                                                                                                                    |      |      |      |      |      | 1.4  |      |      |      |      | 1.7  | 1.7  |      |      |      |
| MT1H   | metallothionein 1H                                                                                                                    | 1.3  |      |      | 1.5  | 1.5  | 2.1  | 2.1  | 1.4  | 1.4  | 3.0  | 3.0  |      | 1.3  | 1.3  | 1.3  |
| MT1X   | metallothionein 1X                                                                                                                    | 1.4  |      |      | 2.1  | 2.1  | 2.2  |      |      | 1.6  | 1.6  | 1.8  | 1.8  |      | 1.7  | 1.7  |
| MT2A   | metallothionein 2A                                                                                                                    |      |      |      |      |      | 1.5  |      |      | 3.2  | 3.2  | 3.0  | 3.0  |      | 1.2  | 1.2  |
| MT3    | metallothionein 3 (growth inhibitory factor (neurotrophic))                                                                           | 1.4  |      |      | 1.5  | 1.5  | 1.7  | 1.7  |      |      |      |      |      |      |      |      |
| MTA1   | metastasis associated 1                                                                                                               |      |      |      | -1.6 |      | -1.2 |      |      | 1.4  | 1.4  | -1.4 | -1.4 |      | -1.6 | -1.6 |
| MTCP1  | mature T-cell proliferation 1                                                                                                         |      |      |      | 1.3  | 1.3  |      |      |      | -1.4 | -1.4 | -1.8 |      | 1.4  |      |      |
| MTF1   | metal-regulatory transcription factor 1                                                                                               |      |      |      |      |      |      |      |      |      |      | -1.4 |      |      | -1.3 |      |
| MTHFD1 | methyltetrahydrofolate dehydrogenase (NADP+ dependent) 1, methylenetetrahydrofolate cyclohydrolase, formyltetrahydrofolate synthetase | -1.4 | -1.4 | -1.9 | -1.9 | -1.5 | -1.5 | -1.5 | 1.5  | 1.5  | -2.2 | -2.2 | -2.2 | -2.2 | -5.0 | -5.0 |
| MTHFD2 | methyltetrahydrofolate dehydrogenase (NADP+ dependent) 2, methylenetetrahydrofolate cyclohydrolase                                    | -2.1 | -2.1 | -2.8 | -2.8 | -1.7 | -1.7 | -1.7 |      |      | -2.0 | -2.0 | -2.0 | -2.0 | -2.7 | -2.7 |
| MTHFS  | 5,10-methylenetetrahydrofolate synthetase (5-formyltetrahydrofolate cyclo-ligase)                                                     |      |      |      |      |      | -1.7 | 1.3  | -1.4 | -1.4 |      |      |      | 1.3  |      |      |
| MTIF2  | mitochondrial translational initiation factor 2                                                                                       | 1.4  |      |      |      |      | -1.3 | -1.3 |      |      |      |      |      | -1.3 | -1.3 | -1.3 |
| MTM1   | myotubularin 1                                                                                                                        | 1.6  |      |      | 2.4  | 2.4  | 1.5  |      |      | 2.5  | 2.5  | 1.4  |      |      | -2.5 | -2.5 |
| MTMR2  | myotubularin related protein 2                                                                                                        |      |      |      |      |      |      |      |      | -1.2 | -1.2 | -1.3 | -1.3 |      | 1.5  |      |
| MTMR3  | myotubularin related protein 3                                                                                                        | 1.4  |      |      | 1.4  | 1.4  |      |      |      | -1.4 | -1.4 | 1.5  | 1.5  |      | 1.9  | 1.9  |
| MTMR4  | myotubularin related protein 4                                                                                                        | -1.3 | -1.3 | -1.5 |      |      | -1.8 | -1.8 |      |      |      |      |      |      |      |      |
| MTMR6  | myotubularin related protein 6                                                                                                        |      |      |      |      |      |      |      |      | -1.4 | -1.4 | 2.2  | 1.7  |      | 1.5  | 1.5  |
| MTMR9  | myotubularin related protein 9                                                                                                        |      |      |      | 1.3  |      |      |      |      |      |      | 1.3  |      |      |      |      |
| MTR    | 5-methyltetrahydrofolate-homocysteine methyltransferase                                                                               | -1.2 |      |      |      |      | -1.3 | -1.3 |      |      |      | 1.4  | 1.4  |      | -1.7 | -1.7 |
| MTRR   | 5-methyltetrahydrofolate-homocysteine methyltransferase reductase                                                                     | -1.7 |      |      | -1.4 |      | -1.4 |      |      |      |      | -1.2 | -1.2 |      | -1.8 | -1.8 |
| MTSS1  | metastasis suppressor 1                                                                                                               |      |      |      |      |      | 2.0  |      |      | 13.4 | 13.4 | 6.6  | 6.6  |      | -4.9 | -4.9 |
| MTX1   | metaxin 1                                                                                                                             |      |      |      | -1.2 | -1.2 |      |      |      | -1.3 |      | -1.3 |      |      | -1.2 |      |
| MTX2   | metaxin 2                                                                                                                             | -1.5 |      |      | -1.5 | -1.5 | -1.5 |      |      | 1.3  | 1.3  |      |      |      | -2.1 | -2.1 |
| MUC1   | mucin 1, cell surface associated                                                                                                      |      |      |      |      |      | 1.4  |      |      |      |      |      |      |      |      |      |
| MUT    | methylmalonyl Coenzyme A mutase                                                                                                       |      |      |      | 1.3  | 1.3  |      |      |      | -1.6 | -1.6 |      |      |      | 2.0  | 2.0  |
| MUTYH  | mutY homolog (E. coli)                                                                                                                |      |      |      | 1.4  | 1.4  |      |      |      |      |      |      |      |      |      |      |
| MVK    | mevalonate kinase (mevalonic aciduria)                                                                                                |      |      |      |      |      | 1.2  |      |      | -1.2 |      |      |      |      | 1.4  | 1.4  |
| MX2    | myxovirus (influenza virus) resistance 2 (mouse)                                                                                      |      |      |      | 1.2  |      |      |      |      |      |      |      |      |      |      |      |
| MXI1   | MAX interactor 1                                                                                                                      | -2.7 | -2.7 | -3.3 | -3.3 | -1.6 |      |      | 6.4  | 6.4  | -1.7 | -1.7 |      | -6.2 | -6.2 | -6.2 |
| MYB    | v-myb myeloblastosis viral oncogene homolog (avian)                                                                                   | -1.3 |      |      | 2.4  | 2.4  | -1.4 |      |      | 2.2  | 2.2  | 1.8  | 1.8  |      | -2.0 | -2.0 |
| MYBL1  | v-myb myeloblastosis viral oncogene homolog (avian)-like 1                                                                            | 1.3  |      |      |      |      |      |      |      |      |      |      |      |      |      |      |
| MYBL2  | v-myb myeloblastosis viral oncogene homolog (avian)-like 2                                                                            |      |      |      |      |      |      |      |      |      |      |      |      |      | -2.5 | -2.5 |
| MYBPC1 | myosin binding protein C, slow type                                                                                                   |      |      |      |      |      | 1.4  |      |      |      |      |      |      |      |      |      |
| MYC    | v-myc myelocytomatosis viral oncogene homolog (avian)                                                                                 | -3.8 | -3.8 | -4.6 | -4.6 | -3.6 | -3.6 | -3.6 |      | 1.6  | 1.6  | -2.8 | -2.8 |      | -4.8 | -4.8 |
| MYCBP  | c-myc binding protein                                                                                                                 |      |      |      |      |      |      |      |      | 1.3  | 1.3  | -1.2 | -1.2 |      | -1.6 | -1.6 |
| MYCBP2 | MYC binding protein 2                                                                                                                 | -1.2 |      |      |      |      | -1.3 |      |      | -1.5 | -1.5 | -1.4 | -1.4 |      | 1.2  |      |
| MYD88  | myeloid differentiation primary response gene (88)                                                                                    | -1.3 |      |      |      |      |      |      |      |      |      | -1.6 | -1.6 |      |      |      |
| MYEF2  | myelin expression factor 2                                                                                                            | 1.2  |      |      |      |      |      |      |      |      |      | 1.3  |      |      |      |      |
| MYH10  | myosin, heavy chain 10, non-muscle                                                                                                    |      |      |      | -1.3 |      |      |      |      | -3.7 | -3.7 | -1.4 | -1.3 |      | 3.8  | 3.8  |
| MYH9   | myosin, heavy chain 9, non-muscle                                                                                                     | 1.4  |      |      | 1.3  |      | 1.6  | 1.6  | -1.8 | -1.8 | 1.3  |      |      |      | 2.2  | 2.2  |
| MYL6   | myosin, light chain 6, alkali, smooth muscle and non-muscle                                                                           |      |      |      |      |      | 1.2  |      |      |      |      | 1.5  | 1.5  |      | 1.4  | 1.4  |



|          |                                                                                               |      |      |      |      |      |      |      |      |      |      |      |      |
|----------|-----------------------------------------------------------------------------------------------|------|------|------|------|------|------|------|------|------|------|------|------|
| NDUFB7   | NADH dehydrogenase (ubiquinone) 1 beta subcomplex, 7, 18kDa                                   | -1.3 |      |      |      |      |      | -1.3 | -1.3 | 1.9  | 1.9  | 1.7  |      |
| NDUFB8   | NADH dehydrogenase (ubiquinone) 1 beta subcomplex, 8, 19kDa                                   |      |      |      |      |      |      | 1.2  | 1.2  | -1.2 |      | -2.1 | -2.1 |
| NDUFC1   | NADH dehydrogenase (ubiquinone) 1, subcomplex unknown, 1, 6kDa                                |      |      | -1.2 |      |      |      | 1.4  | 1.4  |      |      | -2.0 | -2.0 |
| NDUFS1   | NADH dehydrogenase (ubiquinone) Fe-S protein 1, 75kDa (NADH-coenzyme Q reductase)             |      |      |      |      | -1.2 |      | -1.6 | -1.6 | -1.5 | -1.5 | 1.4  | 1.4  |
| NDUFS2   | NADH dehydrogenase (ubiquinone) Fe-S protein 2, 49kDa (NADH-coenzyme Q reductase)             |      |      |      |      |      |      | 1.9  | 1.9  | -1.3 |      | -1.7 | -1.7 |
| NDUFS3   | NADH dehydrogenase (ubiquinone) Fe-S protein 3, 30kDa (NADH-coenzyme Q reductase)             |      |      |      |      |      |      |      |      | -1.4 | -1.4 | -1.7 | -1.7 |
| NDUFS4   | NADH dehydrogenase (ubiquinone) Fe-S protein 4, 18kDa (NADH-coenzyme Q reductase)             |      |      |      |      | -1.3 |      |      |      |      |      | 1.6  | 1.6  |
| NDUFS5   | NADH dehydrogenase (ubiquinone) Fe-S protein 5, 15kDa (NADH-coenzyme Q reductase)             |      |      |      |      | -1.2 |      | -1.9 | -1.9 | -1.5 | -1.5 | -1.3 | -1.3 |
| NDUFS6   | NADH dehydrogenase (ubiquinone) Fe-S protein 6, 13kDa (NADH-coenzyme Q reductase)             | 1.2  |      |      |      |      |      | -1.5 | -1.5 |      |      | -1.8 | -1.8 |
| NDUFS7   | NADH dehydrogenase (ubiquinone) Fe-S protein 7, 20kDa (NADH-coenzyme Q reductase)             |      |      |      |      |      |      | -1.3 |      | -1.6 | -1.6 | -1.7 | -1.7 |
| NDUFS8   | NADH dehydrogenase (ubiquinone) Fe-S protein 8, 23kDa (NADH-coenzyme Q reductase)             |      |      | -1.2 |      |      |      |      |      | 1.7  | -1.5 | -2.2 | -2.2 |
| NDUFV1   | NADH dehydrogenase (ubiquinone) flavoprotein 1, 51kDa                                         |      |      |      |      |      |      | -1.6 | -1.6 | -1.4 | -1.4 | -2.0 | -2.0 |
| NDUFV2   | NADH dehydrogenase (ubiquinone) flavoprotein 2, 24kDa                                         | -1.2 |      | -1.3 |      | -1.3 | -1.4 |      |      |      |      |      |      |
| NEBL     | nebulette                                                                                     |      |      |      |      |      |      | -1.3 |      | -1.6 |      | 1.8  | 1.8  |
| NECAP1   | NECAP endocytosis associated 1                                                                |      |      |      |      |      |      | -1.3 | -1.3 | -1.3 | -1.3 | 1.6  | 1.6  |
| NEDD4    | neural precursor cell expressed, developmentally down-regulated 4                             |      |      |      |      |      |      | 2.8  | 2.8  | 1.2  |      | -3.0 | -3.0 |
| NEDD8    | neural precursor cell expressed, developmentally down-regulated 8                             |      |      |      |      |      |      |      |      | -1.3 |      | -1.2 |      |
| NEK1     | NIMA (never in mitosis gene a)-related kinase 1                                               |      |      |      |      |      |      | -1.5 | -1.5 | -2.4 | -2.4 | -1.3 |      |
| NEK2     | NIMA (never in mitosis gene a)-related kinase 2                                               |      |      | 1.5  |      |      |      | -1.9 | -1.9 | 1.5  | 1.5  | 2.1  | 2.1  |
| NEK4     | NIMA (never in mitosis gene a)-related kinase 4                                               |      |      | 1.5  |      |      |      |      |      | 1.3  | 1.3  |      |      |
| NEK9     | NIMA (never in mitosis gene a)-related kinase 9                                               |      |      |      |      |      |      |      |      |      |      |      |      |
| NEURL    | neurularized homolog (Drosophila)                                                             |      |      |      |      |      |      |      |      |      |      | -2.0 |      |
| NF1      | neurofibromin 1 (neurofibromatosis, von Recklinghausen disease, Watson disease)               |      |      | 1.7  |      | 1.7  |      |      |      | 2.0  | 2.0  | -1.4 | -1.4 |
| NF2      | neurofibromin 2 (bilateral acoustic neuroma)                                                  | -1.3 |      |      |      | -1.2 |      | -1.3 | -1.3 | -1.4 |      | 1.4  |      |
| NFATC2IP | nuclear factor of activated T-cells, cytoplasmic, calcineurin-dependent 2 interacting protein | 1.4  |      | 1.4  | 1.4  | 1.2  |      | -2.4 | -2.4 | -1.3 | -1.3 | 1.3  |      |
| NFATC3   | nuclear factor of activated T-cells, cytoplasmic, calcineurin-dependent 3                     | -1.4 |      | -1.4 | -1.4 | -1.3 | -1.9 | -1.9 | -1.8 | -1.4 | -1.4 | 1.2  |      |
| NFE2     | nuclear factor (erythroid-derived 2), 45kDa                                                   |      |      |      |      | -3.3 |      |      |      |      |      |      |      |
| NFE2L1   | nuclear factor (erythroid-derived 2)-like 1                                                   |      |      |      |      | -1.4 | -1.4 | 1.6  | 1.6  | 1.2  |      | -1.5 | -1.5 |
| NFE2L2   | nuclear factor (erythroid-derived 2)-like 2                                                   |      |      |      |      |      |      | 2.2  | 2.2  | -1.4 | 1.3  | -2.1 | -2.1 |
| NFIC     | nuclear factor I/C (CCAAT-binding transcription factor)                                       |      |      |      |      |      | 1.2  | 5.9  | 5.9  | -1.9 | -1.9 | -8.4 | -8.4 |
| NFIL3    | nuclear factor, interleukin 3 regulated                                                       | 6.0  | 6.0  | 7.4  | 7.4  | 3.6  | 3.6  | -2.5 | -2.5 | 5.0  | 5.0  | 19.1 | 19.1 |
| NFKB1    | nuclear factor of kappa light polypeptide gene enhancer in B-cells 1 (p105)                   | 1.4  | 1.4  | 1.6  | 1.5  | -1.3 |      |      |      | -2.2 | -2.2 |      |      |
| NFKB2    | nuclear factor of kappa light polypeptide gene enhancer in B-cells 2 (p49/p100)               |      |      |      |      |      |      | -1.5 | -1.5 |      |      | 1.7  | 1.7  |
| NFKBIA   | nuclear factor of kappa light polypeptide gene enhancer in B-cells inhibitor, alpha           | 3.0  | 3.0  | 3.4  | 3.4  | 2.8  | 2.8  | 1.9  | 1.9  | 2.5  | 2.5  | 5.5  | 5.5  |
| NFKBIB   | nuclear factor of kappa light polypeptide gene enhancer in B-cells inhibitor, beta            |      |      |      |      |      |      |      |      |      |      |      |      |
| NFKBIE   | nuclear factor of kappa light polypeptide gene enhancer in B-cells inhibitor, epsilon         |      |      |      |      | -1.5 |      |      |      |      |      |      |      |
| NFRKB    | nuclear factor related to kappaB binding protein                                              |      |      |      |      | 1.3  |      | 2.2  | 2.2  |      |      | -6.3 | -6.3 |
| NFX1     | nuclear transcription factor, X-box binding 1                                                 |      |      |      |      |      |      |      |      | 1.5  |      | -1.3 | -1.3 |
| NFYA     | nuclear transcription factor Y, alpha                                                         |      |      |      |      | -1.4 |      | 1.6  | 1.6  |      |      | -1.9 | -1.9 |
| NFYB     | nuclear transcription factor Y, beta                                                          |      |      | 1.2  |      |      |      | -1.6 | -1.6 |      |      | 1.3  | 1.3  |
| NFYC     | nuclear transcription factor Y, gamma                                                         |      |      | -1.3 | -1.3 |      |      | -1.4 | -1.4 | -1.3 | -1.3 | -1.2 | -1.2 |
| NGFR     | nerve growth factor receptor (TNFR superfamily, member 16)                                    |      |      |      |      | 1.3  |      |      |      | 6.7  | 6.7  |      |      |
| NHP2L1   | NHP2 non-histone chromosome protein 2-like 1 (S. cerevisiae)                                  |      |      |      |      |      |      |      |      | -1.6 | -1.6 | -1.9 | -1.9 |
| NIPSNAP1 | nipsnap homolog 1 (C. elegans)                                                                |      |      | -1.3 |      | -1.8 | -1.8 |      |      | -2.9 | -2.9 | -1.8 | -1.8 |
| NISCH    | nischarin                                                                                     |      |      | -1.2 |      |      |      |      |      |      |      | 3.1  | 3.1  |
| NIT1     | nitrilase 1                                                                                   | 1.4  |      |      |      |      |      |      |      |      |      | 1.3  | 1.3  |
| NKRF     | NF-kappaB repressing factor                                                                   | -1.4 |      | -1.5 | -1.5 |      |      |      |      |      |      | -1.3 | -1.3 |
| NKTR     | natural killer-tumor recognition sequence                                                     |      |      | 1.3  |      | 1.3  |      | 2.0  | 2.0  |      |      | -1.7 | -1.7 |
| NKX2-5   | NK2 transcription factor related, locus 5 (Drosophila)                                        | -2.0 | -2.0 | -2.8 | -2.8 | -2.4 | -2.4 |      |      |      |      |      |      |
| NMB      | neuromedin B                                                                                  |      |      |      |      |      |      | 1.4  | 1.4  |      |      | -2.0 | -2.0 |
| NME1     | non-metastatic cells 1, protein (NM23A) expressed in                                          | -1.5 | -1.5 | -2.2 | -2.2 | -1.7 | -1.7 |      |      | -4.4 | -4.4 | -7.6 | -7.6 |
| NME2     | non-metastatic cells 2, protein (NM23B) expressed in                                          |      |      | -1.3 |      | -1.3 |      |      |      | -1.3 |      | -1.6 | -1.6 |
| NME4     | non-metastatic cells 4, protein expressed in                                                  | -1.3 |      | -2.3 | -2.3 | -1.6 |      |      |      | -2.1 | -2.1 | -2.5 | -2.5 |
| NME6     | non-metastatic cells 6, protein expressed in (nucleoside-diphosphate kinase)                  |      |      |      |      | 1.2  |      | 1.6  | 1.6  |      |      | -1.6 | -1.6 |
| NMI      | N-myc (and STAT) interactor                                                                   |      |      |      |      | -1.3 |      | 1.2  | 1.2  |      |      | -1.8 | -1.8 |
| NMT1     | N-myristoyltransferase 1                                                                      |      |      | -1.2 |      |      |      |      |      | 1.4  | -1.3 | -1.3 | -1.3 |
| NMT2     | N-myristoyltransferase 2                                                                      | 1.2  |      |      |      |      |      | 1.3  |      | -2.4 | -2.4 |      |      |
| NNT      | nicotinamide nucleotide transhydrogenase                                                      | 1.3  |      | 1.3  |      |      |      | 1.3  | 1.3  |      |      | -1.3 | -1.3 |







|         |                                                                                                |      |      |      |      |      |      |       |       |      |      |      |      |
|---------|------------------------------------------------------------------------------------------------|------|------|------|------|------|------|-------|-------|------|------|------|------|
| PDPK1   | 3-phosphoinositide dependent protein kinase-1                                                  |      |      |      |      |      |      | -1.8  | -1.8  | 1.4  |      | 2.3  | 2.3  |
| PDXK    | pyridoxal (pyridoxine, vitamin B6) kinase                                                      |      |      |      |      |      | -1.4 | 2.8   | 2.8   | 1.2  |      | -4.7 | -4.7 |
| PEA15   | phosphoprotein enriched in astrocytes 15                                                       |      |      |      |      |      | -1.4 | -1.3  | -1.3  | -1.4 |      |      |      |
| PECAM1  | platelet/endothelial cell adhesion molecule (CD31 antigen)                                     |      |      |      |      |      | -1.5 | -1.5  | -1.2  |      | -1.7 | -1.7 | 1.2  |
| PELP1   | proline, glutamic acid and leucine rich protein 1                                              |      |      | -1.3 |      |      |      |       |       | 1.4  |      |      |      |
| PEMT    | phosphatidylethanolamine N-methyltransferase                                                   |      |      | -1.8 | -1.8 |      |      | -3.7  | -3.7  |      |      |      |      |
| PEPD    | peptidase D                                                                                    |      |      |      |      |      |      |       |       | -1.8 | -1.8 | -1.3 | -1.3 |
| PER1    | period homolog 1 (Drosophila)                                                                  | 1.3  |      | 1.3  |      |      | 1.9  |       |       | 1.3  |      | 19.4 | 19.4 |
| PER2    | period homolog 2 (Drosophila)                                                                  | -1.6 |      | -1.3 |      |      | -1.6 | -2.0  | -2.0  | -1.7 | -1.7 |      |      |
| PES1    | pescadillo homolog 1, containing BRCT domain (zebrafish)                                       | -1.6 | -1.6 | -1.8 | -1.8 | -1.6 | -1.6 |       |       |      |      | -1.6 | -1.6 |
| PEX1    | peroxisome biogenesis factor 1                                                                 | 1.5  |      | 1.4  |      |      |      |       |       | 1.5  | 1.5  | 3.2  | 3.2  |
| PEX10   | peroxisome biogenesis factor 10                                                                | -1.3 |      | -1.3 |      |      | 1.6  | -1.3  |       | -1.5 |      |      |      |
| PEX11B  | peroxisomal biogenesis factor 11B                                                              | 1.2  |      | 1.3  | 1.3  |      |      | -1.4  | -1.4  | 1.4  | 1.4  | 1.9  | 1.9  |
| PEX14   | peroxisomal biogenesis factor 14                                                               |      |      |      |      |      | -1.7 | -1.7  | 1.3   | 1.3  |      | -1.3 | -1.3 |
| PEX19   | peroxisomal biogenesis factor 19                                                               | -1.3 |      |      |      |      | -1.3 |       |       |      |      |      |      |
| PEX3    | peroxisomal biogenesis factor 3                                                                |      |      |      |      |      | -1.2 |       | 1.4   | 1.3  | -2.4 | -2.4 | -2.3 |
| PEX5    | peroxisomal biogenesis factor 5                                                                | -1.3 | -1.3 | -1.3 |      |      | -1.6 |       |       |      |      | -1.3 | -1.3 |
| PEX6    | peroxisomal biogenesis factor 6                                                                |      |      |      |      |      | -1.2 |       | 1.5   |      |      | -1.4 |      |
| PFAS    | phosphoribosylformylglycinamide synthase (FGAR amidotransferase)                               | -1.4 |      | -2.1 | -2.1 | -1.2 |      | -2.4  | -2.4  | -2.7 | -2.7 | -2.3 | -2.3 |
| PFDN1   | prefoldin subunit 1                                                                            |      |      |      |      |      |      | -1.4  |       |      |      | 1.7  |      |
| PFDN4   | prefoldin subunit 4                                                                            |      |      |      |      |      |      |       |       | 1.3  |      | 1.6  |      |
| PFDN5   | prefoldin subunit 5                                                                            |      |      |      |      |      |      |       | 1.4   | 1.4  | 1.4  | 1.4  | -1.2 |
| PFKFB2  | 6-phosphofructo-2-kinase/fructose-2,6-biphosphatase 2                                          |      |      |      |      |      | 1.3  |       |       |      |      | 2.4  | 2.4  |
| PFKFB3  | 6-phosphofructo-2-kinase/fructose-2,6-biphosphatase 3                                          | -1.3 |      |      |      |      |      |       |       |      |      |      |      |
| PFKM    | phosphofructokinase, muscle                                                                    |      |      |      |      |      | -1.5 | -26.2 | -26.2 | -4.3 | -4.3 | 7.9  | 7.9  |
| PFKP    | phosphofructokinase, platelet                                                                  |      |      |      |      |      |      | 1.5   | 1.5   | 1.7  | 1.7  | -1.6 | -1.6 |
| PFN1    | profilin 1                                                                                     | -1.3 |      | -1.2 |      |      |      | -2.1  | -2.1  |      |      | 1.8  | 1.8  |
| PFN2    | profilin 2                                                                                     |      |      |      |      |      | -1.4 |       |       |      |      |      |      |
| PGAM1   | phosphoglycerate mutase 1 (brain)                                                              | -1.2 | -1.2 | -1.3 | -1.3 |      |      | 1.5   | 1.5   | -1.2 | -1.2 | -2.4 | -2.4 |
| PGD     | phosphogluconate dehydrogenase                                                                 |      |      | -1.2 | -1.2 |      |      | 1.8   | 1.8   | -1.3 | -1.3 | -2.1 | -2.1 |
| PGGT1B  | protein geranylgeranyltransferase type I, beta subunit                                         |      |      | 1.7  |      |      |      | -3.2  | -3.2  | 1.4  |      | 3.9  | 3.9  |
| PGK1    | phosphoglycerate kinase 1                                                                      | -1.3 |      | -1.6 | -1.6 | -1.5 |      | 1.3   | 1.3   | -1.9 | -1.9 | -2.6 | -2.6 |
| PGM1    | phosphoglucomutase 1                                                                           |      |      |      |      |      |      | 1.7   | 1.7   | -1.8 | -1.8 | -3.2 | -3.2 |
| PGM3    | phosphoglucomutase 3                                                                           | 1.4  |      | 1.2  |      | 1.4  |      | -2.6  | -2.6  |      |      | 1.5  |      |
| PGRMC1  | progesterone receptor membrane component 1                                                     |      |      |      |      |      |      | 1.3   |       | -1.5 | -1.5 | -1.8 | -1.8 |
| PGRMC2  | progesterone receptor membrane component 2                                                     | -1.2 | -1.2 | -1.3 | -1.3 |      |      | 1.7   | 1.7   |      |      | -2.6 | -2.6 |
| PHB     | prohibitin                                                                                     | -1.4 |      | -1.5 |      |      |      |       |       |      |      | -1.9 | -1.9 |
| PHB2    | prohibitin 2                                                                                   |      |      |      |      |      | -1.3 | -1.7  | -1.7  |      |      | 1.5  | 1.5  |
| PHC2    | polyhomeotic homolog 2 (Drosophila)                                                            |      |      |      |      |      |      | -1.6  | -1.6  |      |      | 1.7  | 1.7  |
| PHF1    | PHD finger protein 1                                                                           |      |      |      |      |      | -1.2 | 1.8   | 1.8   |      |      | -1.6 | -1.6 |
| PHF21A  | PHD finger protein 21A                                                                         |      |      |      |      |      | 1.4  | 2.0   | 2.0   | -1.3 |      | -1.5 | -1.5 |
| PHGDH   | phosphoglycerate dehydrogenase                                                                 | -1.3 |      |      |      |      |      | -1.7  | -1.7  | -2.4 | -2.4 | -2.3 | -2.3 |
| PHKA1   | phosphorylase kinase, alpha 1 (muscle)                                                         |      |      |      |      |      |      | 3.0   | 3.0   |      |      | -4.3 | -4.3 |
| PHKA2   | phosphorylase kinase, alpha 2 (liver)                                                          | 1.3  |      |      |      |      |      | 1.7   | 1.7   | -1.3 | -1.3 |      |      |
| PHKB    | phosphorylase kinase, beta                                                                     | 1.4  |      |      |      |      | 1.3  | -1.7  | -1.7  | 1.4  | 1.4  | 2.0  | 2.0  |
| PHYH    | phytanoyl-CoA 2-hydroxylase                                                                    |      |      |      |      |      |      |       |       | 1.7  | 1.7  |      |      |
| PIAS1   | protein inhibitor of activated STAT, 1                                                         |      |      |      |      |      |      | 1.7   | 1.7   | 1.7  | 1.4  | 2.2  | 2.2  |
| PIAS2   | protein inhibitor of activated STAT, 2                                                         | 1.2  |      | 1.4  |      | 1.5  |      | -1.4  |       | -1.7 | -1.7 | -1.9 | -1.9 |
| PICALM  | phosphatidylinositol binding clathrin assembly protein                                         | 1.7  | 1.7  | 1.7  | 1.7  | 1.5  | 1.5  | 2.1   | 2.1   | 2.0  | 2.0  | 2.1  | 2.1  |
| PIG8    | centrosomal protein 57kDa                                                                      |      |      |      |      |      | -1.3 | 1.6   | 1.6   | -1.3 |      | -2.3 | -2.3 |
| PIGA    | phosphatidylinositol glycan anchor biosynthesis, class A (paroxysmal nocturnal hemoglobinuria) |      |      |      |      |      |      |       |       | 1.5  | 1.5  |      |      |
| PIGB    | phosphatidylinositol glycan anchor biosynthesis, class B                                       | 1.4  |      |      |      |      |      | 1.2   |       |      |      | -1.6 | -1.6 |
| PIGC    | phosphatidylinositol glycan anchor biosynthesis, class C                                       |      |      | 1.3  | 1.3  |      |      | 1.9   | 1.9   | 2.5  | 2.5  | -1.3 | -1.3 |
| PIGF    | phosphatidylinositol glycan anchor biosynthesis, class F                                       |      |      |      |      |      | -1.2 |       |       | -1.3 |      |      |      |
| PIGH    | phosphatidylinositol glycan anchor biosynthesis, class H                                       |      |      |      |      |      |      |       |       |      |      | 1.4  |      |
| PIGR    | polymeric immunoglobulin receptor                                                              |      |      |      |      |      | 1.4  |       |       |      |      |      |      |
| PIK3C2A | phosphoinositide-3-kinase, class 2, alpha polypeptide                                          |      |      |      |      |      | -1.2 | 2.5   | 2.5   | 1.7  | 1.7  | 1.4  | 1.4  |
| PIK3C2B | phosphoinositide-3-kinase, class 2, beta polypeptide                                           |      |      |      |      |      |      |       |       |      |      | -5.3 | -5.3 |







|         |                                                                                                                      |      |      |      |      |      |      |     |  |      |      |      |      |       |       |
|---------|----------------------------------------------------------------------------------------------------------------------|------|------|------|------|------|------|-----|--|------|------|------|------|-------|-------|
| PRIM1   | primase, polypeptide 1, 49kDa                                                                                        |      |      |      | -1.5 | -1.5 | -1.2 |     |  | -1.3 | -1.3 | -1.8 | -1.8 | -2.3  | -2.3  |
| PRIM2A  | primase, polypeptide 2A, 58kDa                                                                                       |      |      |      | -1.2 | -1.2 |      |     |  | 1.4  | 1.4  |      |      | -1.4  | -1.4  |
| PRKAA1  | protein kinase, AMP-activated, alpha 1 catalytic subunit                                                             |      |      |      |      |      |      |     |  | 1.3  | 1.3  | 1.6  | 1.6  | -1.3  |       |
| PRKAB1  | protein kinase, AMP-activated, beta 1 non-catalytic subunit                                                          | -1.4 |      |      |      |      |      |     |  | 1.5  | 1.5  |      |      |       |       |
| PRKAB2  | protein kinase, AMP-activated, beta 2 non-catalytic subunit                                                          | 1.7  |      |      |      |      |      |     |  | 5.1  | 5.1  | -1.5 |      | 2.3   | 2.3   |
| PRKACB  | protein kinase, cAMP-dependent, catalytic, beta                                                                      |      |      |      | 1.8  | 1.8  |      |     |  | 2.4  | 2.4  | -2.7 | -2.7 | -1.6  | -1.6  |
| PRKAG1  | protein kinase, AMP-activated, gamma 1 non-catalytic subunit                                                         |      |      |      |      |      |      |     |  | 1.2  | 1.2  |      |      | 1.3   |       |
| PRKAR1A | protein kinase, cAMP-dependent, regulatory, type I, alpha (tissue specific extinguisher 1)                           | 1.2  |      |      | 1.8  | 1.8  |      |     |  | 2.0  | 2.0  | 1.4  | 1.4  | -1.3  |       |
| PRKAR1B | protein kinase, cAMP-dependent, regulatory, type I, beta                                                             | -1.6 | -1.6 | -1.3 | -1.3 | -1.2 |      |     |  |      |      |      |      |       |       |
| PRKAR2B | protein kinase, cAMP-dependent, regulatory, type II, beta                                                            | 1.4  | 1.4  | 2.0  | 2.0  |      |      |     |  | -1.4 |      | 1.4  |      | 1.9   | 1.9   |
| PRKCA   | protein kinase C, alpha                                                                                              | 1.6  | 1.6  | 1.5  |      |      |      |     |  | 6.6  | 6.6  | 1.3  | 1.3  | -7.0  | -7.0  |
| PRKCABP | protein interacting with PRKCA 1                                                                                     |      |      |      |      |      |      | 1.3 |  |      |      |      |      |       |       |
| PRKCB1  | protein kinase C, beta 1                                                                                             | 1.2  |      | 2.3  | 2.3  | -1.2 |      |     |  | 20.7 | 20.7 | 1.6  | 1.6  | -18.3 | -18.3 |
| PRKCBP1 | protein kinase C binding protein 1                                                                                   |      |      |      |      |      | 1.7  |     |  | -1.2 | -1.2 | 1.4  | 1.4  | 1.6   | 1.6   |
| PRKCD   | protein kinase C, delta                                                                                              | 1.6  |      |      |      |      |      |     |  |      |      |      |      | 6.3   | 6.3   |
| PRKCH   | protein kinase C, eta                                                                                                | -1.6 |      |      |      |      |      |     |  | 3.4  | 3.4  | 3.7  | 3.7  | -2.4  | -2.4  |
| PRKCI   | protein kinase C, iota                                                                                               | 1.2  |      | 2.0  | 2.0  | -1.4 | -1.4 |     |  | 1.2  |      |      |      | 3.5   | 3.5   |
| PRKCQ   | protein kinase C, theta                                                                                              |      |      |      |      |      |      |     |  | 1.6  | 1.6  |      |      | -2.4  | -2.4  |
| PRKCSH  | protein kinase C substrate 80K-H                                                                                     |      |      |      |      |      |      |     |  |      |      |      |      |       |       |
| PRKD2   | protein kinase D2                                                                                                    |      |      |      |      |      |      |     |  | -3.2 | -3.2 | 1.8  | 1.8  | 4.8   | 4.8   |
| PRKDC   | protein kinase, DNA-activated, catalytic polypeptide                                                                 |      |      |      |      |      |      |     |  | -1.3 | -1.2 | -1.6 | -1.6 | -2.1  | -2.1  |
| PRKRA   | protein kinase, interferon-inducible double stranded RNA dependent activator                                         | -1.3 |      | -1.8 | -1.8 | -1.5 |      |     |  | -1.9 | -1.9 | 2.5  | 2.5  | 5.0   | 5.0   |
| PRKRIR  | protein-kinase, interferon-inducible double stranded RNA dependent inhibitor, repressor of (P58 repressor)           | -1.2 | -1.2 | 1.3  |      |      |      |     |  |      |      | -1.6 | -1.6 | -1.4  | -1.4  |
| PRKX    | protein kinase, X-linked                                                                                             | 2.0  |      |      |      | -1.2 |      |     |  | -2.3 | -2.3 | 3.4  | 3.4  | 5.3   | 5.3   |
| PRKY    | protein kinase, Y-linked                                                                                             |      |      | -1.5 |      |      |      |     |  |      |      |      |      | 1.4   |       |
| PRMT3   | protein arginine methyltransferase 3                                                                                 | -1.6 | -1.6 | -2.4 | -2.4 | -2.1 | -2.1 |     |  | -1.3 | -1.3 | -2.4 | -2.4 | -2.8  | -2.8  |
| PRNP    | prion protein (p27-30) (Creutzfeldt-Jakob disease, Gerstmann-Sträussler-Scheinker syndrome, fatal familial insomnia) |      |      |      |      |      |      |     |  | -1.4 | -1.4 | -1.3 |      |       |       |
| PRNPPIP | prion protein interacting protein                                                                                    |      |      | -1.6 | -1.6 |      |      |     |  |      |      | -1.3 |      | -2.5  | -2.5  |
| PROCR   | protein C receptor, endothelial (EPCR)                                                                               |      |      |      |      | -2.2 | -2.2 |     |  | 6.6  | 6.6  | -1.5 | -1.5 | -12.1 | -12.1 |
| PROSC   | proline synthetase co-transcribed homolog (bacterial)                                                                | -1.3 |      | 1.3  |      | -1.2 |      |     |  |      |      |      |      | -1.5  | -1.5  |
| PRPF18  | PRP18 pre-mRNA processing factor 18 homolog (S. cerevisiae)                                                          |      |      | 1.2  |      | -1.3 |      |     |  |      |      |      |      |       |       |
| PRPF19  | PRP19/PSO4 pre-mRNA processing factor 19 homolog (S. cerevisiae)                                                     | -1.3 |      |      |      |      |      |     |  | -1.3 | -1.3 | -1.9 | -1.9 | -2.2  | -2.2  |
| PRPF3   | PRP3 pre-mRNA processing factor 3 homolog (S. cerevisiae)                                                            |      |      |      |      |      | -1.6 |     |  |      |      |      |      |       |       |
| PRPF31  | PRP31 pre-mRNA processing factor 31 homolog (S. cerevisiae)                                                          |      |      | 1.3  | 1.3  | -1.6 | -1.6 |     |  | -1.6 | -1.2 |      |      | -2.1  | -2.1  |
| PRPF4   | PRP4 pre-mRNA processing factor 4 homolog (yeast)                                                                    |      |      | -1.4 | -1.3 | -1.5 |      |     |  | -1.3 | -1.3 | -2.2 | -2.2 | -2.1  | -2.1  |
| PRPF4B  | PRP4 pre-mRNA processing factor 4 homolog B (yeast)                                                                  | 1.4  |      |      |      |      |      |     |  | 1.3  |      |      |      | -1.3  | -1.3  |
| PRPF8   | PRP8 pre-mRNA processing factor 8 homolog (S. cerevisiae)                                                            |      |      | -1.3 | -1.3 |      |      |     |  | -1.4 | -1.4 | -1.3 | -1.3 |       |       |
| PRPH    | peripherin                                                                                                           |      |      | 1.4  |      | 1.3  |      |     |  |      |      |      |      |       |       |
| PRPS1   | phosphoribosyl pyrophosphate synthetase 1                                                                            | -1.5 | -1.5 |      |      | -1.4 |      |     |  | -2.1 | -2.1 | -2.6 | -2.6 | -2.3  | -2.3  |
| PRPS2   | phosphoribosyl pyrophosphate synthetase 2                                                                            |      |      |      |      | -1.4 |      |     |  | 1.3  | 1.3  |      |      | -2.1  | -2.1  |
| PRPSAP1 | phosphoribosyl pyrophosphate synthetase-associated protein 1                                                         |      |      | 1.3  |      |      |      |     |  | 1.9  | 1.9  |      |      | -1.3  | -1.3  |
| PRPSAP2 | phosphoribosyl pyrophosphate synthetase-associated protein 2                                                         |      |      |      |      | -1.3 |      |     |  | -1.8 | -1.8 | -1.5 |      | 1.3   |       |
| PRSS25  | HtrA serine peptidase 2                                                                                              |      |      |      |      |      |      |     |  | 1.5  | 1.5  | -1.5 | -1.5 | -1.9  | -1.9  |
| PRSS3   | protease, serine, 3 (mesotrypsin)                                                                                    |      |      |      |      |      | 1.4  |     |  |      |      |      |      |       |       |
| PRSS8   | protease, serine, 8 (prostasin)                                                                                      |      |      | 1.3  | 1.3  | 1.5  |      |     |  |      |      |      |      |       |       |
| PRUNE   | prune homolog (Drosophila)                                                                                           |      |      |      |      | -1.3 |      |     |  | -1.5 | -1.5 | -1.9 | -1.9 |       |       |
| PSAP    | prosaposin (variant Gaucher disease and variant metachromatic leukodystrophy)                                        |      |      |      |      | 1.3  |      |     |  | 3.1  | 3.1  | -1.4 | -1.4 | -1.4  |       |
| PSCD1   | pleckstrin homology, Sec7 and coiled-coil domains 1 (cytohesin 1)                                                    |      |      |      |      |      |      |     |  | -1.2 |      | 1.3  |      | 1.9   | 1.9   |
| PSCD2   | pleckstrin homology, Sec7 and coiled-coil domains 2 (cytohesin-2)                                                    |      |      |      |      |      | 1.3  |     |  | -1.3 |      | 1.4  | 1.4  | 1.8   | 1.8   |
| PSEN1   | presenilin 1 (Alzheimer disease 3)                                                                                   | 1.7  | 1.7  | 1.8  | 1.8  | 1.5  | 1.5  |     |  | 1.3  | 1.3  | 1.5  | 1.5  | 2.0   | 2.0   |
| PSF1    | GIN5 complex subunit 1 (Psf1 homolog)                                                                                |      |      | -1.5 | -1.3 |      |      |     |  | -1.9 | -1.9 | -1.6 | -1.6 | -2.3  | -2.3  |
| PSG1    | pregnancy specific beta-1-glycoprotein 1                                                                             |      |      | 1.3  |      |      |      |     |  | -1.2 |      | -1.4 |      |       |       |
| PSIP1   | PC4 and SFRS1 interacting protein 1                                                                                  | 1.3  |      |      |      |      |      |     |  | -2.0 | -2.0 | -1.5 | -1.5 | 2.5   | 2.5   |
| PSKH1   | protein serine kinase H1                                                                                             |      |      | 1.3  |      | 1.4  |      |     |  |      |      |      |      |       |       |
| PSMA1   | proteasome (prosome, macropain) subunit, alpha type, 1                                                               | 1.3  |      |      |      |      |      |     |  | -1.2 | -1.2 | -1.2 |      | -1.3  | -1.3  |
| PSMA2   | proteasome (prosome, macropain) subunit, alpha type, 2                                                               | -1.3 |      |      |      | -1.2 |      |     |  | 3.5  | 3.5  | -1.3 | -1.3 | -5.0  | -5.0  |
| PSMA3   | proteasome (prosome, macropain) subunit, alpha type, 3                                                               |      |      |      |      | -1.4 |      |     |  | 1.3  | 1.3  | -1.7 | -1.7 | -1.7  | -1.7  |
| PSMA4   | proteasome (prosome, macropain) subunit, alpha type, 4                                                               |      |      |      |      | -1.3 |      |     |  |      |      | -1.3 | -1.3 | -1.5  | -1.5  |

|        |                                                                                           |  |      |      |      |      |      |      |        |        |      |      |      |      |
|--------|-------------------------------------------------------------------------------------------|--|------|------|------|------|------|------|--------|--------|------|------|------|------|
| PSMA5  | proteasome (prosome, macropain) subunit, alpha type, 5                                    |  | -1.2 |      | -1.2 |      | -1.4 | -1.4 |        | -1.4   | -1.4 | -2.3 | -2.3 |      |
| PSMA6  | proteasome (prosome, macropain) subunit, alpha type, 6                                    |  | 1.2  |      | 1.4  |      |      | -1.3 | -1.3   |        |      | 1.3  | 1.3  |      |
| PSMB1  | proteasome (prosome, macropain) subunit, beta type, 1                                     |  |      |      |      |      | -1.2 |      |        |        |      | -1.5 | -1.5 |      |
| PSMB10 | proteasome (prosome, macropain) subunit, beta type, 10                                    |  |      |      | -1.2 | -1.2 | -1.2 |      | -3.7   | -3.7   |      | 1.5  | 1.5  |      |
| PSMB2  | proteasome (prosome, macropain) subunit, beta type, 2                                     |  |      |      |      |      |      |      | -1.2   | -1.2   | -1.6 | -1.6 | -1.5 | -1.5 |
| PSMB3  | proteasome (prosome, macropain) subunit, beta type, 3                                     |  |      |      |      |      |      |      |        | -1.2   | -1.2 | -1.8 | -1.8 |      |
| PSMB4  | proteasome (prosome, macropain) subunit, beta type, 4                                     |  |      |      | 1.2  |      | -1.3 |      | 1.3    | 1.3    | -1.4 | -1.4 | -1.3 | -1.2 |
| PSMB5  | proteasome (prosome, macropain) subunit, beta type, 5                                     |  | -1.4 | -1.4 | -1.4 | -1.4 | -1.4 | -1.4 | 1.5    | 1.5    | -1.4 | -1.4 | -2.2 | -2.2 |
| PSMB6  | proteasome (prosome, macropain) subunit, beta type, 6                                     |  |      |      | -1.2 |      | -1.3 |      | -1.6   | -1.6   |      |      |      |      |
| PSMB7  | proteasome (prosome, macropain) subunit, beta type, 7                                     |  |      |      |      |      | -1.3 |      |        |        |      |      | -1.8 | -1.8 |
| PSMB8  | proteasome (prosome, macropain) subunit, beta type, 8 (large multifunctional peptidase 7) |  |      |      |      |      | -1.2 |      | -18.9  | -18.9  |      |      | 16.2 | 16.2 |
| PSMB9  | proteasome (prosome, macropain) subunit, beta type, 9 (large multifunctional peptidase 2) |  |      |      |      |      | -1.2 |      | -202.7 | -202.7 | -1.3 | -1.3 | 22.2 | 22.2 |
| PSMC1  | proteasome (prosome, macropain) 26S subunit, ATPase, 1                                    |  |      |      |      |      | -1.5 |      |        |        |      |      |      |      |
| PSMC2  | proteasome (prosome, macropain) 26S subunit, ATPase, 2                                    |  |      |      | -1.2 |      | -1.3 |      |        |        |      |      | -1.5 | -1.5 |
| PSMC3  | proteasome (prosome, macropain) 26S subunit, ATPase, 3                                    |  |      |      | -1.2 |      | -1.5 |      | -1.4   | -1.4   |      |      | -1.5 | -1.5 |
| PSMC4  | proteasome (prosome, macropain) 26S subunit, ATPase, 4                                    |  |      |      |      |      | -1.3 |      | 1.3    |        | -1.3 | -1.3 | -2.9 | -2.9 |
| PSMC5  | proteasome (prosome, macropain) 26S subunit, ATPase, 5                                    |  |      |      |      |      |      |      | 1.6    | 1.6    |      |      | -2.6 | -2.6 |
| PSMC6  | proteasome (prosome, macropain) 26S subunit, ATPase, 6                                    |  |      |      |      |      | -1.2 |      | 1.3    | 1.3    | 1.3  |      | -1.4 | -1.4 |
| PSMD1  | proteasome (prosome, macropain) 26S subunit, non-ATPase, 1                                |  |      |      |      |      |      |      | -1.6   | -1.6   | -1.4 | -1.4 | -1.4 | -1.4 |
| PSMD10 | proteasome (prosome, macropain) 26S subunit, non-ATPase, 10                               |  | -1.2 |      | -1.2 |      | -1.4 |      | -1.2   | -1.2   |      |      | -1.2 | -1.2 |
| PSMD11 | proteasome (prosome, macropain) 26S subunit, non-ATPase, 11                               |  |      |      |      |      | -1.4 |      |        |        |      |      | -2.1 | -1.6 |
| PSMD12 | proteasome (prosome, macropain) 26S subunit, non-ATPase, 12                               |  |      |      | -1.5 |      | -1.4 |      | 1.6    | 1.6    |      |      | -2.2 | -2.2 |
| PSMD13 | proteasome (prosome, macropain) 26S subunit, non-ATPase, 13                               |  |      |      |      |      |      |      |        |        | 1.4  |      | -1.9 | -1.9 |
| PSMD14 | proteasome (prosome, macropain) 26S subunit, non-ATPase, 14                               |  |      |      |      |      | -1.4 |      | 1.3    | 1.3    |      |      | -2.4 | -2.4 |
| PSMD2  | proteasome (prosome, macropain) 26S subunit, non-ATPase, 2                                |  |      |      |      |      |      |      | 1.3    | 1.3    |      |      | -1.8 | -1.8 |
| PSMD3  | proteasome (prosome, macropain) 26S subunit, non-ATPase, 3                                |  |      |      | -1.4 |      |      |      |        |        | -1.5 | -1.5 | -2.0 | -2.0 |
| PSMD4  | proteasome (prosome, macropain) 26S subunit, non-ATPase, 4                                |  |      |      |      |      | -1.3 |      | 1.3    | 1.3    |      |      | -1.6 | -1.6 |
| PSMD5  | proteasome (prosome, macropain) 26S subunit, non-ATPase, 5                                |  |      |      |      |      |      |      | 3.0    | 3.0    | -1.2 |      | -2.5 | -2.5 |
| PSMD6  | proteasome (prosome, macropain) 26S subunit, non-ATPase, 6                                |  |      |      |      |      | -1.6 |      |        |        | -1.2 | -1.2 |      |      |
| PSMD7  | proteasome (prosome, macropain) 26S subunit, non-ATPase, 7 (Mov34 homolog)                |  |      |      |      |      | -1.4 |      |        |        |      | -1.3 | -1.2 |      |
| PSMD8  | proteasome (prosome, macropain) 26S subunit, non-ATPase, 8                                |  | -1.2 |      | -1.3 | -1.3 |      |      | -1.5   | -1.5   | -1.3 | -1.3 |      |      |
| PSMD9  | proteasome (prosome, macropain) 26S subunit, non-ATPase, 9                                |  | -1.2 |      |      |      | -1.2 |      |        |        | 1.3  |      |      |      |
| PSME1  | proteasome (prosome, macropain) activator subunit 1 (PA28 alpha)                          |  |      |      |      |      | -1.2 |      | -1.9   | -1.9   | -1.8 | -1.8 |      |      |
| PSME2  | proteasome (prosome, macropain) activator subunit 2 (PA28 beta)                           |  |      |      | -1.3 | -1.3 |      |      | -2.4   | -2.4   | -1.8 | -1.8 |      |      |
| PSME3  | proteasome (prosome, macropain) activator subunit 3 (PA28 gamma; Ki)                      |  |      |      | -1.4 | -1.4 | -1.4 | -1.4 | 1.5    | 1.5    | -2.2 | -2.2 | -2.6 | -2.6 |
| PSPH   | phosphoserine phosphatase                                                                 |  | -1.6 |      |      |      | -1.9 |      | 3.3    | 3.3    | -2.0 | -2.0 | -8.6 | -8.6 |
| PTBP1  | polypyrimidine tract binding protein 1                                                    |  |      |      |      |      |      |      |        |        | -1.5 | -1.5 | -2.1 | -2.1 |
| PTDSR  | phosphatidylserine receptor                                                               |  | 1.3  |      | 1.5  | 1.5  | -1.4 |      |        |        | 1.4  | 1.4  | 1.3  |      |
| PTEN   | phosphatase and tensin homolog (mutated in multiple advanced cancers 1)                   |  | 2.3  | 2.3  | 2.3  | 2.3  | 1.5  |      | 4.2    | 4.2    | -1.5 | -1.3 | -4.7 | -4.7 |
| PTGER3 | prostaglandin E receptor 3 (subtype EP3)                                                  |  |      |      | 1.2  | 1.2  |      |      | -1.5   |        | 1.7  | 1.7  | 1.2  |      |
| PTK2B  | PTK2B protein tyrosine kinase 2 beta                                                      |  | 2.1  | 2.1  | 3.1  | 3.1  | 4.2  | 4.2  | -1.3   | -1.3   |      |      | 1.9  | 1.9  |
| PTK7   | PTK7 protein tyrosine kinase 7                                                            |  | 1.2  | 1.2  |      |      |      |      |        |        |      | -1.2 |      |      |
| PTK9L  | twinfilin, actin-binding protein, homolog 2 (Drosophila)                                  |  |      |      |      |      |      |      |        |        |      |      | 1.5  |      |
| PTMA   | prothymosin, alpha (gene sequence 28)                                                     |  |      |      | -1.2 |      | -1.4 |      | -1.7   | -1.7   | -1.3 | -1.3 | -1.2 |      |
| PTOV1  | prostate tumor overexpressed gene 1                                                       |  |      |      | -1.5 |      |      |      | -1.5   |        | -1.8 | -1.8 |      |      |
| PTP4A1 | protein tyrosine phosphatase type IVA, member 1                                           |  | -1.4 |      |      |      | -1.4 |      | -1.7   | -1.7   | -1.8 | -1.8 | -1.9 | -1.9 |
| PTP4A2 | protein tyrosine phosphatase type IVA, member 2                                           |  |      |      | 1.3  | 1.3  | 1.2  |      | 1.3    | 1.2    | 1.5  | 1.5  | -1.9 | -1.9 |
| PTPLB  | protein tyrosine phosphatase-like (proline instead of catalytic arginine), member b       |  |      |      | 1.2  |      |      |      | 2.2    | 2.2    | 2.3  | 2.3  | 2.2  | 2.2  |
| PTPN1  | protein tyrosine phosphatase, non-receptor type 1                                         |  | 1.4  |      | 1.5  | 1.5  | 1.6  | 1.6  | -1.8   |        |      |      | 3.0  | 3.0  |
| PTPN11 | protein tyrosine phosphatase, non-receptor type 11 (Noonan syndrome 1)                    |  | -1.6 |      | 1.5  |      | -1.9 |      | 1.3    | 1.3    | -1.6 |      | -1.3 | -1.3 |
| PTPN12 | protein tyrosine phosphatase, non-receptor type 12                                        |  | 1.3  | 1.3  | 1.3  | 1.3  |      |      | -10.9  | -10.9  | 2.4  | 2.4  | 75.8 | 75.8 |
| PTPN18 | protein tyrosine phosphatase, non-receptor type 18 (brain-derived)                        |  | 1.4  | 1.4  | 1.5  | 1.5  |      |      |        |        | 1.3  |      | 1.4  | 1.4  |
| PTPN2  | protein tyrosine phosphatase, non-receptor type 2                                         |  | -1.6 | -1.3 | -1.3 |      | -2.1 | -2.1 | 1.3    | 1.3    | -1.2 | -1.2 | -1.6 | -1.6 |
| PTPN22 | protein tyrosine phosphatase, non-receptor type 22 (lymphoid)                             |  |      |      |      |      |      |      | 2.9    | 2.9    | -2.0 |      | -8.4 | -8.4 |
| PTPN3  | protein tyrosine phosphatase, non-receptor type 3                                         |  | 1.3  |      | 2.4  | 2.4  | 1.3  |      |        |        | 1.4  |      | 15.7 | 15.7 |
| PTPN4  | protein tyrosine phosphatase, non-receptor type 4 (megakaryocyte)                         |  |      |      | 1.3  | 1.2  |      |      | -1.6   | -1.6   | -1.6 | -1.6 |      |      |
| PTPN6  | protein tyrosine phosphatase, non-receptor type 6                                         |  | 1.3  | 1.3  | 1.8  |      | 1.4  |      | -5.5   | -5.5   |      |      | 7.8  | 7.8  |
| PTPN7  | protein tyrosine phosphatase, non-receptor type 7                                         |  |      |      |      |      |      |      | 3.3    | 3.3    | -1.5 | -1.5 | -4.7 | -4.7 |



|          |                                                                                          |      |      |      |      |      |      |        |        |      |      |      |       |       |
|----------|------------------------------------------------------------------------------------------|------|------|------|------|------|------|--------|--------|------|------|------|-------|-------|
| RAC3     | ras-related C3 botulinum toxin substrate 3 (rho family, small GTP binding protein Rac3)  |      |      |      |      | 1.7  |      | 9.3    |        |      |      |      | -17.1 | -17.1 |
| RAD1     | RAD1 homolog (S. pombe)                                                                  |      |      |      |      | -1.5 |      | -1.6   | -1.6   | -2.0 | -1.7 |      | -3.2  | -3.2  |
| RAD17    | RAD17 homolog (S. pombe)                                                                 | -1.3 |      |      |      | -1.4 |      | 1.3    |        | -2.1 | -2.1 |      | -1.3  | -1.2  |
| RAD21    | RAD21 homolog (S. pombe)                                                                 |      |      |      |      |      |      | -2.3   | -2.3   | 1.3  | 1.3  |      | 2.5   | 2.5   |
| RAD23A   | RAD23 homolog A (S. cerevisiae)                                                          | -1.4 | -1.2 | -1.6 | -1.6 | -1.3 |      | -1.2   |        | -1.4 | -1.4 |      | -1.4  |       |
| RAD23B   | RAD23 homolog B (S. cerevisiae)                                                          |      |      | -1.3 | -1.3 | -1.3 |      | -1.3   | -1.3   |      |      |      | -1.2  |       |
| RAD51AP1 | RAD51 associated protein 1                                                               |      |      |      |      | 1.4  |      | -2.8   | -2.8   | -1.4 | -1.4 |      | -1.3  | -1.3  |
| RAD51C   | RAD51 homolog C (S. cerevisiae)                                                          |      |      | -1.6 |      |      |      | -1.5   |        |      | -1.9 | -1.9 | -1.9  | -1.9  |
| RAD51L1  | RAD51-like 1 (S. cerevisiae)                                                             |      |      |      |      | -1.8 | -1.8 |        |        |      |      |      |       |       |
| RAD51L3  | RAD51-like 3 (S. cerevisiae)                                                             |      |      | -1.7 |      |      |      | 1.8    | -1.2   |      | -1.7 | -1.7 |       |       |
| RAD52    | RAD52 homolog (S. cerevisiae)                                                            |      |      | 1.3  |      | 1.4  |      | -1.6   | -1.6   | 1.5  | 1.5  |      | 4.0   | 4.0   |
| RAD54L   | RAD54-like (S. cerevisiae)                                                               |      |      | -1.3 |      | -1.2 |      | -1.3   |        | -1.5 | -1.5 |      | -1.9  | -1.9  |
| RAE1     | RAE1 RNA export 1 homolog (S. pombe)                                                     |      |      |      |      | -1.3 |      | -1.3   | -1.3   | -1.4 | -1.4 |      | -1.4  | -1.4  |
| RAF1     | v-raf-1 murine leukemia viral oncogene homolog 1                                         |      |      | 1.4  |      |      |      | -1.3   | -1.3   | -1.6 |      |      |       |       |
| RAFTLIN  | raftlin, lipid raft linker 1                                                             |      |      | -1.2 |      | -1.5 |      | -1.5   | -1.5   | -1.5 | -1.5 |      |       |       |
| RAG1     | recombination activating gene 1                                                          | -3.6 | -3.6 | -3.2 | -3.2 | -4.2 | -4.2 | -32.2  | -32.2  | -1.3 |      |      | 14.5  | 14.5  |
| RAG2     | recombination activating gene 2                                                          |      |      | 1.3  |      |      |      | -7.4   | -7.4   |      |      |      | 6.4   | 6.4   |
| RAGE     | renal tumor antigen                                                                      | 1.5  |      | -1.4 |      | 1.3  |      |        |        |      |      |      |       |       |
| RAI17    | zinc finger, MIZ-type containing 1                                                       | -1.3 |      |      |      | -1.5 |      |        |        | -1.3 | -1.3 |      | -1.6  | -1.6  |
| RALA     | v-ral simian leukemia viral oncogene homolog A (ras related)                             | -1.3 |      |      |      | -1.2 |      | 1.7    | 1.7    | -1.3 | -1.3 |      | -2.1  | -2.1  |
| RALB     | v-ral simian leukemia viral oncogene homolog B (ras related; GTP binding protein)        | 1.8  |      |      |      |      |      | 1.5    | 1.5    | 1.9  | 1.9  |      | 1.6   | 1.6   |
| RALBP1   | ralA binding protein 1                                                                   | -1.2 |      |      |      | -1.6 |      | -1.8   | -1.8   | -1.4 | -1.4 |      | 1.2   | 1.2   |
| RALY     | RNA binding protein, autoantigenic (hnRNP-associated with lethal yellow homolog (mouse)) |      |      |      |      |      |      | -1.4   | -1.4   | 1.3  |      |      | 1.2   | 1.2   |
| RAMP3    | receptor (G protein-coupled) activity modifying protein 3                                |      |      |      |      |      |      |        |        |      |      |      |       |       |
| RAN      | RAN, member RAS oncogene family                                                          |      |      |      |      |      |      | -1.2   | -1.2   | 1.2  | -1.2 |      | -1.4  | -1.4  |
| RANBP1   | RAN binding protein 1                                                                    | -1.3 |      | -1.8 | -1.8 | -1.5 |      | -1.9   | -1.9   | -1.6 |      |      | -2.8  | -2.8  |
| RANBP2   | RAN binding protein 2                                                                    |      |      |      |      |      |      | 2.5    | 2.5    | -1.4 | -1.4 |      | -1.9  | -1.9  |
| RANBP3   | RAN binding protein 3                                                                    |      |      |      |      |      |      |        |        |      |      |      |       |       |
| RANBP5   | RAN binding protein 5                                                                    |      |      |      |      | -1.5 | -1.5 | -1.3   | -1.3   | -2.0 | -2.0 |      | -2.3  | -2.3  |
| RANBP9   | RAN binding protein 9                                                                    |      |      | -1.5 | -1.5 |      |      | -1.6   | -1.6   | -1.4 | -1.3 |      | 2.1   | 2.1   |
| RANGAP1  | Ran GTPase activating protein 1                                                          |      |      |      |      |      |      |        |        |      |      |      |       |       |
| RANGAP1  | --                                                                                       | -1.2 |      | -1.6 |      |      |      | -1.4   |        | -1.4 | -1.4 |      | -1.5  | -1.5  |
| RAP1A    | RAP1A, member of RAS oncogene family                                                     |      |      | 1.2  |      |      |      | 2.0    | 2.0    |      |      |      | -2.2  | -2.2  |
| RAP1B    | RAP1B, member of RAS oncogene family                                                     | 1.4  |      | 1.5  | 1.5  |      |      |        |        | 1.3  | 1.3  |      |       |       |
| RAP1GDS1 | RAP1, GTP-GDP dissociation stimulator 1                                                  |      |      |      |      |      |      | -1.5   | -1.5   |      |      |      | 2.0   | 2.0   |
| RAP2A    | RAP2A, member of RAS oncogene family                                                     |      |      | 3.9  | 3.9  |      |      | -1.4   | -1.4   | 1.6  | 1.6  |      | 4.0   | 4.0   |
| RAPGEF2  | Rap guanine nucleotide exchange factor (GEF) 2                                           | 1.7  |      | 1.7  | 1.7  | 1.4  |      | 1.8    | 1.8    | 2.0  | 2.0  |      | 4.2   | 4.2   |
| RARRES3  | retinoic acid receptor responder (tazarotene induced) 3                                  |      |      | 1.2  |      |      |      |        |        | -1.7 |      |      | 1.6   | 1.6   |
| RARS     | arginyl-tRNA synthetase                                                                  | -1.2 | -1.2 | -1.3 | -1.3 | -1.4 |      |        |        |      |      |      | -1.9  | -1.9  |
| RASA1    | RAS p21 protein activator (GTPase activating protein) 1                                  | 1.9  | 1.9  | 2.2  | 2.2  | 2.1  | 2.0  | 1.9    | 1.9    | 2.3  | 2.3  |      | 3.5   | 3.5   |
| RASA3    | RAS p21 protein activator 3                                                              |      |      | 2.4  | 2.4  |      |      | -2.6   | -2.6   | 3.9  | 3.9  |      | 4.0   | 4.0   |
| RASA4    | RAS p21 protein activator 4                                                              | -1.3 |      | -1.4 |      |      |      | 2.0    | 2.0    | -1.3 |      |      | -3.4  | -3.4  |
| RASGRP1  | RAS guanyl releasing protein 1 (calcium and DAG-regulated)                               |      |      | 1.4  |      | -1.8 |      | -111.1 | -111.1 | -7.2 | -7.2 |      |       |       |
| RASGRP2  | RAS guanyl releasing protein 2 (calcium and DAG-regulated)                               |      |      |      |      |      |      | -2.3   | -2.3   | 2.1  | 2.1  |      | 4.4   | 4.4   |
| RASSF1   | Ras association (RalGDS/AF-6) domain family 1                                            |      |      |      |      |      |      |        |        |      |      |      |       |       |
| RASSF2   | Ras association (RalGDS/AF-6) domain family 2                                            | 1.4  |      | 2.1  | 2.1  | -1.2 |      | -6.4   | -6.4   | -2.5 | -2.5 |      | 3.5   | 3.5   |
| RASSF7   | Ras association (RalGDS/AF-6) domain family 7                                            |      |      | -1.3 |      |      |      |        |        |      |      |      |       |       |
| RB1      | retinoblastoma 1 (including osteosarcoma)                                                |      |      | 1.6  |      | -2.0 |      | -2.6   | -2.6   | 1.5  | 1.5  |      | 3.1   | 3.1   |
| RB1CC1   | RB1-inducible coiled-coil 1                                                              | -1.2 |      |      |      | -1.6 |      | -1.4   | -1.4   | 1.7  | 1.7  |      | 1.7   | 1.7   |
| RBBP4    | retinoblastoma binding protein 4                                                         |      |      | 1.4  |      | -1.4 |      | -1.3   | -1.3   | -1.4 | -1.4 |      | -1.5  | -1.5  |
| RBBP5    | retinoblastoma binding protein 5                                                         |      |      |      |      | -1.5 |      | -1.3   | -1.3   |      |      |      | 1.3   | 1.3   |
| RBBP6    | retinoblastoma binding protein 6                                                         | -1.2 |      |      |      | -1.2 |      | -1.8   | -1.8   | 1.4  |      |      | 2.5   | 2.5   |
| RBBP8    | retinoblastoma binding protein 8                                                         | -1.3 | -1.3 |      |      | -1.3 |      | -1.9   | -1.9   | -1.7 | -1.7 |      | -1.5  | -1.5  |
| RBL1     | retinoblastoma-like 1 (p107)                                                             |      |      |      |      | 1.4  |      | -1.8   | -1.8   | 1.3  |      |      | -1.4  |       |
| RBL2     | retinoblastoma-like 2 (p130)                                                             | 1.3  |      | 2.5  | 2.5  | 1.7  |      | 1.5    | 1.5    | 1.5  | 1.5  |      | -1.3  | -1.3  |
| RBM10    | RNA binding motif protein 10                                                             |      |      |      |      | -1.3 |      |        |        | -1.3 | -1.3 |      |       |       |
| RBM13    | RNA binding motif protein 13                                                             | -1.6 | -1.6 | -1.2 |      | -1.3 | -1.3 | 1.2    |        | -1.8 | -1.8 |      | -2.1  | -2.1  |
| RBM14    | RNA binding motif protein 14                                                             | -1.2 | -1.2 | -1.3 | -1.3 |      |      | -1.6   |        |      |      |      | -1.4  |       |



|         |                                                               |      |      |      |      |      |      |      |      |      |      |      |      |
|---------|---------------------------------------------------------------|------|------|------|------|------|------|------|------|------|------|------|------|
| RNASEH1 | ribonuclease H1                                               | -1.2 |      |      |      |      |      | -1.4 |      | -1.3 | -1.3 | -1.9 | -1.9 |
| RNF10   | ring finger protein 10                                        |      |      | 1.2  |      |      |      |      |      |      |      |      |      |
| RNF103  | ring finger protein 103                                       | 1.3  | 1.3  | 1.7  | 1.7  |      |      | -1.2 |      | 1.5  | 1.5  | 1.7  | 1.7  |
| RNF11   | ring finger protein 11                                        | -1.3 |      | 1.3  | 1.3  | -1.2 |      |      |      | 1.5  | 1.5  | 1.5  | 1.5  |
| RNF113A | ring finger protein 113A                                      |      |      |      |      |      |      |      |      |      |      |      |      |
| RNF13   | ring finger protein 13                                        |      |      |      |      | -1.5 |      | 1.4  | 1.3  | -1.5 | -1.5 |      |      |
| RNF139  | ring finger protein 139                                       |      |      |      |      |      |      | 1.4  | 1.4  |      |      |      |      |
| RNF14   | ring finger protein 14                                        |      |      |      |      |      |      | 1.3  |      | 1.4  | 1.4  | 2.3  | 2.3  |
| RNF144  | ring finger protein 144                                       | 1.5  |      | 1.2  |      |      |      | 3.5  | 3.5  |      |      | -4.3 | -4.3 |
| RNF2    | ring finger protein 2                                         | -1.2 |      | -1.3 |      | -1.3 |      | -1.5 |      |      |      |      |      |
| RNF4    | ring finger protein 4                                         |      |      |      |      |      |      |      |      |      |      | -1.3 | -1.3 |
| RNF40   | ring finger protein 40                                        |      |      |      |      |      |      |      |      |      |      |      |      |
| RNF5    | ring finger protein 5                                         |      |      | 1.3  |      | -1.3 |      |      |      |      |      | -1.5 | -1.5 |
| RNF6    | ring finger protein (C3H2C3 type) 6                           |      |      | -1.3 |      | -1.2 |      | -2.2 | -2.2 | 1.2  | 1.2  | 2.2  | 2.2  |
| RNGTT   | RNA guanylyltransferase and 5'-phosphatase                    |      |      |      |      |      |      | -1.6 | -1.6 | -1.4 |      | 1.3  |      |
| RNH     | ribonuclease/angiogenin inhibitor 1                           |      |      | -1.4 |      | -1.3 | -1.3 | 2.4  | 2.4  | -1.5 | -1.5 | -4.2 | -4.2 |
| RNMT    | RNA (guanine-7-) methyltransferase                            |      |      |      |      | -1.5 |      | 1.3  | 1.3  | -2.1 |      | -1.5 | -1.5 |
| RNPC1   | RNA binding motif protein 38                                  | 1.5  |      |      |      |      |      | -1.9 | -1.9 | 1.4  | 1.4  | 1.9  | 1.9  |
| RNPC2   | RNA binding motif protein 39                                  |      |      |      |      | 1.2  |      | 1.8  | 1.8  | 2.3  | 2.3  | 1.3  | 1.3  |
| RNPEP   | arginyl aminopeptidase (aminopeptidase B)                     | 1.3  |      | 1.3  | 1.3  |      |      |      |      |      |      |      |      |
| RNPS1   | RNA binding protein S1, serine-rich domain                    |      |      | -1.4 |      |      |      | -5.0 | -5.0 | -1.3 | -1.2 | 2.5  | 2.5  |
| RNUT1   | snurportin 1                                                  |      |      |      |      | -1.4 |      | 1.3  | 1.3  |      |      | -1.5 | -1.5 |
| ROCK1   | Rho-associated, coiled-coil containing protein kinase 1       |      |      | 1.4  |      |      |      |      |      | 1.2  |      | 1.8  | 1.8  |
| ROCK2   | Rho-associated, coiled-coil containing protein kinase 2       |      |      | 1.2  |      |      |      | -1.3 |      | 1.3  | 1.3  |      |      |
| ROD1    | ROD1 regulator of differentiation 1 (S. pombe)                |      |      | 1.3  |      |      |      | -1.5 |      | 1.2  |      | 1.9  | 1.9  |
| RORB    | RAR-related orphan receptor B                                 | -1.2 |      |      |      |      |      |      |      |      |      |      |      |
| RP2     | retinitis pigmentosa 2 (X-linked recessive)                   |      |      |      |      |      |      |      |      | 1.2  | 1.2  |      |      |
| RPA1    | replication protein A1, 70kDa                                 |      |      | 1.6  | 1.6  | -1.2 |      | -2.8 | -2.8 | -1.6 | -1.6 | 1.5  | 1.5  |
| RPA2    | replication protein A2, 32kDa                                 |      |      |      |      |      |      |      |      | -1.4 | -1.4 | -1.5 | -1.5 |
| RPA3    | replication protein A3, 14kDa                                 | 1.2  |      |      |      |      |      | -2.0 | -2.0 | -1.4 |      | -1.3 |      |
| RPE     | ribulose-5-phosphate-3-epimerase                              | -1.2 |      |      |      |      |      | -2.1 | -2.1 | -1.5 | -1.5 | 1.4  | 1.4  |
| RPGR    | retinitis pigmentosa GTPase regulator                         | -1.6 | -1.6 | -2.1 | -2.1 | -1.3 |      | 6.5  | 6.5  |      |      | 1.2  |      |
| RPH3A   | rabphilin 3A homolog (mouse)                                  |      |      |      |      |      |      |      |      |      |      |      |      |
| RPIA    | ribose 5-phosphate isomerase A (ribose 5-phosphate epimerase) | -1.3 |      | -1.3 | -1.3 | -1.4 |      |      |      | -1.7 | -1.7 | -2.7 | -2.7 |
| RPL10   | ribosomal protein L10                                         |      |      |      |      |      |      |      |      | 1.7  |      |      |      |
| RPL10A  | ribosomal protein L10a                                        |      |      |      |      |      |      |      |      |      |      |      |      |
| RPL11   | ribosomal protein L11                                         |      |      |      |      |      |      |      |      |      |      |      |      |
| RPL12   | ribosomal protein L12                                         |      |      |      |      |      |      | 1.5  | 1.5  |      |      |      |      |
| RPL13   | ribosomal protein L13                                         |      |      |      |      |      |      | 1.4  | 1.4  |      |      | -3.0 | -3.0 |
| RPL13A  | ribosomal protein L13a                                        |      |      |      |      |      |      | 1.4  | 1.4  | -1.3 |      | -1.2 | -1.2 |
| RPL14   | ribosomal protein L14                                         |      |      |      |      | -1.2 |      |      |      |      |      |      |      |
| RPL15   | ribosomal protein L15                                         |      |      |      |      |      |      | 1.5  | 1.5  | 2.1  | 2.1  | -1.4 | -1.4 |
| RPL17   | ribosomal protein L17                                         |      |      |      |      | -1.3 |      | 2.1  | 2.1  | -1.8 | -1.8 | -2.3 | -2.3 |
| RPL18   | ribosomal protein L18                                         |      |      |      |      |      |      | 1.7  |      | 2.4  | 2.4  |      |      |
| RPL18A  | ribosomal protein L18a                                        |      |      |      |      |      |      | 1.4  | 1.4  | 1.3  | 1.3  |      |      |
| RPL19   | ribosomal protein L19                                         |      |      |      |      |      |      |      |      | -1.4 |      |      |      |
| RPL21   | ribosomal protein L21                                         |      |      |      |      |      |      |      |      |      |      |      |      |
| RPL22   | ribosomal protein L22                                         |      |      |      |      |      |      | 1.2  | 1.2  |      |      |      |      |
| RPL23   | ribosomal protein L23                                         |      |      |      |      | -1.3 |      | 1.3  | 1.3  | -1.3 | -1.3 | -1.3 | -1.3 |
| RPL23A  | ribosomal protein L23a                                        |      |      |      |      |      |      |      |      |      |      |      |      |
| RPL24   | ribosomal protein L24                                         |      |      |      |      |      |      |      |      |      |      |      |      |
| RPL27   | ribosomal protein L27                                         |      |      |      |      |      |      |      |      |      |      |      |      |
| RPL27A  | ribosomal protein L27a                                        |      |      | 1.2  |      |      |      |      |      |      |      |      |      |
| RPL28   | ribosomal protein L28                                         |      |      |      |      |      |      |      |      |      |      | -1.4 |      |
| RPL29   | ribosomal protein L29                                         |      |      |      |      |      |      | 2.0  | 2.0  | 1.4  | 1.4  | -1.5 | -1.5 |
| RPL3    | ribosomal protein L3                                          |      |      |      |      |      |      | 1.3  | 1.3  |      |      |      |      |
| RPL30   | ribosomal protein L30                                         |      |      |      |      |      |      |      |      |      |      |      |      |
| RPL31   | ribosomal protein L31                                         |      |      |      |      |      |      | 2.9  | 2.9  | 1.3  | 1.3  | -3.4 | -3.4 |

|         |                                                   |      |      |      |      |      |  |      |      |      |      |      |      |
|---------|---------------------------------------------------|------|------|------|------|------|--|------|------|------|------|------|------|
| RPL32   | ribosomal protein L32                             |      |      |      |      |      |  |      |      |      |      |      |      |
| RPL34   | ribosomal protein L34                             |      |      |      |      |      |  |      |      |      |      |      |      |
| RPL35   | ribosomal protein L35                             | -1.2 |      | -1.3 | -1.3 | -1.3 |  | 2.2  | 2.2  | 2.4  | 2.4  | -1.8 | -1.8 |
| RPL36A  | ribosomal protein L36a                            |      |      |      |      |      |  |      |      |      |      |      |      |
| RPL36AL | ribosomal protein L36a-like                       |      |      |      |      |      |  |      |      | 1.4  | 1.4  |      |      |
| RPL37   | ribosomal protein L37                             |      |      |      |      |      |  | 1.6  | 1.6  | -1.5 | -1.5 | -1.8 | -1.8 |
| RPL37A  | ribosomal protein L37a                            |      |      |      |      |      |  |      |      | -1.3 |      | -2.2 | -2.2 |
| RPL38   | ribosomal protein L38                             |      |      |      |      |      |  | 2.0  | 2.0  |      |      | -1.5 | -1.5 |
| RPL4    | ribosomal protein L4                              | -1.2 |      |      |      | -1.4 |  | 1.3  | 1.3  |      |      |      |      |
| RPL41   | ribosomal protein L41                             |      |      |      |      |      |  |      |      |      |      |      |      |
| RPL5    | ribosomal protein L5                              |      |      | -1.5 |      | 2.7  |  | 1.3  | 1.3  | 1.7  | 1.2  | 1.3  |      |
| RPL6    | ribosomal protein L6                              |      |      |      |      |      |  |      |      |      |      |      |      |
| RPL7    | ribosomal protein L7                              |      |      |      |      |      |  | 1.3  |      | 1.3  |      |      |      |
| RPL8    | ribosomal protein L8                              |      |      |      |      |      |  |      |      |      |      |      |      |
| RPL9    | ribosomal protein L9                              |      |      |      |      |      |  |      |      |      |      |      |      |
| RPLP0   | ribosomal protein, large, P0                      |      |      |      |      |      |  |      |      |      |      |      |      |
| RPLP1   | ribosomal protein, large, P1                      | -1.3 |      |      |      | 1.2  |  |      |      |      |      |      |      |
| RPLP2   | ribosomal protein, large, P2                      |      |      | 1.2  |      |      |  | 1.4  | 1.4  |      |      | -1.7 | -1.7 |
| RPN1    | ribophorin I                                      |      |      |      |      |      |  | 1.5  | 1.5  |      |      | -2.3 | -2.3 |
| RPN2    | ribophorin II                                     |      |      |      |      |      |  | 1.7  | 1.7  | -1.5 | -1.5 | -2.6 | -2.6 |
| RPP14   | ribonuclease P 14kDa subunit                      |      |      |      |      |      |  | 1.9  | 1.9  | -1.7 | -1.7 | -2.7 | -2.7 |
| RPP30   | ribonuclease P/MRP 30kDa subunit                  |      |      |      |      | -1.6 |  |      |      | -1.6 | -1.6 | -1.6 | -1.6 |
| RPP38   | ribonuclease P/MRP 38kDa subunit                  | -1.2 | -1.2 |      |      | -1.4 |  | 1.7  | 1.7  | -1.5 | -1.5 | -1.8 | -1.8 |
| RPP40   | ribonuclease P 40kDa subunit                      | -1.9 | -1.9 | -1.8 |      | -1.4 |  |      |      | -1.9 | -1.9 | -2.3 | -2.3 |
| RPS10   | ribosomal protein S10                             |      |      |      |      |      |  | 1.3  | 1.3  | 1.4  | 1.4  | 1.3  |      |
| RPS11   | ribosomal protein S11                             |      |      |      |      |      |  |      |      |      |      |      |      |
| RPS12   | ribosomal protein S12                             |      |      |      |      |      |  |      |      |      |      |      |      |
| RPS13   | ribosomal protein S13                             |      |      |      |      |      |  |      |      |      |      |      |      |
| RPS14   | ribosomal protein S14                             |      |      |      |      |      |  | 1.5  | 1.5  | 1.6  | 1.6  |      |      |
| RPS15   | ribosomal protein S15                             | -1.2 |      |      |      |      |  |      |      |      |      |      |      |
| RPS15A  | ribosomal protein S15a                            |      |      |      |      | -1.2 |  | 1.5  | 1.5  |      |      | 1.2  | 1.2  |
| RPS16   | ribosomal protein S16                             |      |      |      |      |      |  |      |      |      |      |      |      |
| RPS17   | ribosomal protein S17                             |      |      |      |      |      |  | 1.5  | 1.5  | 1.5  | 1.5  |      |      |
| RPS18   | ribosomal protein S18                             |      |      |      |      |      |  | 2.2  | 2.2  |      |      |      |      |
| RPS19   | ribosomal protein S19                             |      |      |      |      |      |  | 1.3  | 1.3  | -1.6 | -1.6 |      |      |
| RPS2    | ribosomal protein S2                              | -1.2 |      |      |      |      |  | 2.6  | 2.6  |      |      | -1.9 | -1.9 |
| RPS20   | ribosomal protein S20                             |      |      |      |      |      |  |      |      |      |      |      |      |
| RPS21   | ribosomal protein S21                             | -1.3 |      | 1.4  |      |      |  | 3.1  | 3.1  | 1.2  | 1.2  | -3.3 | -3.3 |
| RPS23   | ribosomal protein S23                             |      |      |      |      |      |  | 2.0  | 2.0  | -1.3 |      | -2.1 | -2.1 |
| RPS24   | ribosomal protein S24                             |      |      |      |      |      |  | 2.2  | 2.2  |      |      | -3.2 | -3.2 |
| RPS25   | ribosomal protein S25                             |      |      |      |      |      |  |      |      | 1.3  | 1.3  |      |      |
| RPS26   | ribosomal protein S26                             |      |      |      |      |      |  |      |      |      |      |      |      |
| RPS27   | ribosomal protein S27 (metalloproteinase 1)       |      |      |      |      |      |  | 1.3  |      | -1.3 |      | -1.7 | -1.7 |
| RPS27A  | ribosomal protein S27a                            |      |      |      |      |      |  |      |      |      |      | -1.2 |      |
| RPS28   | ribosomal protein S28                             |      |      |      |      |      |  | 1.2  | 1.2  |      |      |      |      |
| RPS3    | ribosomal protein S3                              |      |      |      |      |      |  | 1.2  | 1.2  |      |      |      |      |
| RPS3A   | ribosomal protein S3A                             |      |      |      |      |      |  |      |      |      |      |      |      |
| RPS4X   | ribosomal protein S4, X-linked                    |      |      |      |      |      |  |      |      | 1.2  |      | 1.5  | 1.5  |
| RPS5    | ribosomal protein S5                              |      |      |      |      |      |  |      |      |      |      |      |      |
| RPS6    | ribosomal protein S6                              |      |      |      |      |      |  | -1.7 | -1.7 | -1.9 | -1.9 | -1.3 | 1.3  |
| RPS6KA1 | ribosomal protein S6 kinase, 90kDa, polypeptide 1 |      |      |      |      |      |  | -2.9 | -2.9 | -1.3 | -1.3 | 3.6  | 3.6  |
| RPS6KA2 | ribosomal protein S6 kinase, 90kDa, polypeptide 2 |      |      | 2.9  | 2.9  |      |  | 7.9  | 7.9  | 6.0  | 6.0  | 14.2 | 14.2 |
| RPS6KA3 | ribosomal protein S6 kinase, 90kDa, polypeptide 3 | 1.2  |      | 1.6  |      |      |  |      |      | -1.5 | -1.5 | -1.7 | -1.7 |
| RPS6KA4 | ribosomal protein S6 kinase, 90kDa, polypeptide 4 |      |      | -1.9 | -1.9 |      |  |      |      | -1.3 | -1.3 | -1.5 | -1.5 |
| RPS6KA5 | ribosomal protein S6 kinase, 90kDa, polypeptide 5 | -1.3 |      | 1.5  |      | 1.2  |  |      |      |      |      |      |      |
| RPS6KB1 | ribosomal protein S6 kinase, 70kDa, polypeptide 1 | -1.3 |      |      |      | -1.3 |  | 1.7  | 1.7  |      |      | -1.7 | -1.7 |
| RPS6KB2 | ribosomal protein S6 kinase, 70kDa, polypeptide 2 |      |      |      |      |      |  |      |      |      |      | -1.3 |      |
| RPS7    | ribosomal protein S7                              |      |      |      |      | -1.2 |  |      |      |      |      |      |      |





|            |                                                                                           |      |      |      |      |      |      |       |       |      |      |      |      |
|------------|-------------------------------------------------------------------------------------------|------|------|------|------|------|------|-------|-------|------|------|------|------|
| SF1        | splicing factor 1                                                                         | 1.4  |      | -1.4 | -1.4 |      |      | -1.6  | -1.6  | -1.4 | -1.4 |      |      |
| SF3A1      | splicing factor 3a, subunit 1, 120kDa                                                     |      |      |      |      | -1.3 |      | -1.4  | -1.4  | -1.5 | -1.5 | -1.2 |      |
| SF3A2      | splicing factor 3a, subunit 2, 66kDa                                                      |      |      | -1.5 | -1.5 | -1.2 |      | -1.5  | -1.5  | -1.6 | -1.6 |      | 1.2  |
| SF3A3      | splicing factor 3a, subunit 3, 60kDa                                                      | -1.3 |      | -1.6 | -1.6 | -1.6 | -1.6 |       |       | -1.4 | -1.4 | -1.9 | -1.9 |
| SF3B1      | splicing factor 3b, subunit 1, 155kDa                                                     | 1.3  | 1.3  |      |      |      |      | 1.8   | 1.8   |      |      |      | 1.3  |
| SF3B2      | splicing factor 3b, subunit 2, 145kDa                                                     |      |      |      |      | -1.3 |      |       |       | -1.4 |      | -1.5 | -1.5 |
| SF3B3      | splicing factor 3b, subunit 3, 130kDa                                                     |      |      |      |      | -1.4 |      | 2.2   | -1.4  | -1.7 | -1.7 | -2.7 | -2.7 |
| SF3B4      | splicing factor 3b, subunit 4, 49kDa                                                      |      |      | 1.2  | 1.2  | 1.2  | 1.2  |       |       |      |      |      |      |
| SF11       | --                                                                                        | -2.0 |      |      |      | 1.8  |      | -1.4  | -1.4  |      |      |      |      |
| SF11       | Sfi1 homolog, spindle assembly associated (yeast)                                         |      |      |      |      |      |      |       |       |      |      |      |      |
| SFN        | stratifin                                                                                 |      |      | 1.2  |      | 1.4  |      | -1.7  | -1.7  | -1.8 | -1.8 |      |      |
| SFPQ       | splicing factor proline/glutamine-rich (polypyrimidine tract binding protein associated)  | 1.4  |      | 1.4  |      | 1.2  |      | -1.5  | 1.4   | 1.2  | 1.2  | -1.3 |      |
| SFRS1      | splicing factor, arginine/serine-rich 1 (splicing factor 2, alternate splicing factor)    |      |      | -1.2 | -1.2 | -1.4 |      | -1.6  | -1.6  | -1.7 | -1.7 | -2.4 | -2.4 |
| SFRS10     | splicing factor, arginine/serine-rich 10 (transformer 2 homolog, Drosophila)              |      |      |      |      | -1.4 |      | -1.7  | -1.7  | -1.2 | -1.2 | -1.3 | -1.3 |
| SFRS11     | splicing factor, arginine/serine-rich 11                                                  |      |      |      |      | -1.2 |      | 2.7   | 2.7   | 4.2  | 4.2  | -4.1 | -4.1 |
| SFRS12     | splicing factor, arginine/serine-rich 12                                                  |      |      |      |      |      |      | 4.5   | 4.5   | -1.7 | -1.7 | -3.5 | -3.5 |
| SFRS2      | splicing factor, arginine/serine-rich 2                                                   | -1.2 |      | -1.6 | -1.2 | -1.2 |      | -1.3  | -1.3  | -1.4 | -1.4 | -1.5 | -1.5 |
| SFRS2B     | splicing factor, arginine/serine-rich 2B                                                  |      |      | 1.3  |      |      |      | -1.3  | -1.3  | -1.3 | -1.3 | 1.5  | 1.3  |
| SFRS2IP    | splicing factor, arginine/serine-rich 2, interacting protein                              | 1.3  |      | 1.6  |      |      |      |       |       |      |      |      |      |
| SFRS3      | splicing factor, arginine/serine-rich 3                                                   |      |      | 1.2  |      | -1.3 |      | -1.4  | -1.4  | -1.4 | 1.3  | 1.5  | 1.5  |
| SFRS4      | splicing factor, arginine/serine-rich 4                                                   |      |      |      |      |      |      | -2.1  | -1.2  | 1.3  |      | 1.3  |      |
| SFRS5      | splicing factor, arginine/serine-rich 5                                                   | 1.2  |      |      |      |      |      |       |       |      |      |      |      |
| SFRS6      | splicing factor, arginine/serine-rich 6                                                   |      |      | -1.7 | -1.7 |      |      | -3.6  | -3.6  |      |      | 3.4  | 3.4  |
| SFRS7      | splicing factor, arginine/serine-rich 7, 35kDa                                            |      |      | -1.6 | -1.6 |      |      | -1.8  | -1.8  | -1.5 | -1.5 | -1.9 | -1.9 |
| SFRS8      | splicing factor, arginine/serine-rich 8 (suppressor-of-white-apricot homolog, Drosophila) | 1.3  |      |      |      | 1.3  |      |       |       | -1.3 | -1.3 |      |      |
| SFRS9      | splicing factor, arginine/serine-rich 9                                                   |      |      |      |      | -1.2 |      | -2.7  | -2.7  | 1.2  | 1.2  | 2.0  | 2.0  |
| SGNE1      | secretogranin V (7B2 protein)                                                             | 1.3  |      |      |      |      |      |       |       |      |      |      |      |
| SGPL1      | sphingosine-1-phosphate lyase 1                                                           | -1.6 |      |      |      |      |      |       |       | -1.3 | -1.3 | 1.3  |      |
| SGSH       | N-sulfoglucosamine sulfohydrolase (sulfamidase)                                           | 1.8  | 1.8  |      |      |      |      |       |       |      |      | 2.1  | 2.1  |
| SGTA       | small glutamine-rich tetratricopeptide repeat (TPR)-containing, alpha                     |      |      |      |      |      |      |       |       |      |      |      |      |
| SH2B       | SH2B adaptor protein 1                                                                    |      |      |      |      |      |      |       |       |      |      | 1.8  | 1.8  |
| SH2D1A     | SH2 domain protein 1A, Duncan's disease (lymphoproliferative syndrome)                    | -1.5 |      | -1.3 | -1.3 | -1.5 |      |       |       |      |      |      |      |
| SH3BP1     | SH3-domain binding protein 1                                                              |      |      | -1.2 |      |      |      |       |       |      |      |      |      |
| SH3BP5     | SH3-domain binding protein 5 (BTK-associated)                                             | -1.8 | -1.8 | -2.5 | -2.5 |      |      |       |       | 2.6  | 2.6  |      |      |
| SH3GL1     | SH3-domain GRB2-like 1                                                                    |      |      | -1.4 |      |      |      | 1.4   |       |      |      | -1.4 |      |
| SH3GLB1    | SH3-domain GRB2-like endophilin B1                                                        |      |      |      |      |      |      | 1.5   | 1.5   | 2.2  | 2.2  | 2.5  | 2.5  |
| SHC1       | SHC (Src homology 2 domain containing) transforming protein 1                             |      |      |      |      |      |      | -1.7  | -1.7  |      |      | 1.3  |      |
| SHFM1      | split hand/foot malformation (ectrodactyly) type 1                                        | 1.2  |      |      |      |      |      | -1.8  | -1.8  |      |      | 1.2  |      |
| SHMT1      | serine hydroxymethyltransferase 1 (soluble)                                               |      |      |      |      | -1.2 |      | -1.5  | -1.5  | -1.8 | -1.8 | 1.4  | 1.4  |
| SHMT2      | serine hydroxymethyltransferase 2 (mitochondrial)                                         |      |      |      |      |      |      | -2.3  | -2.3  | -1.8 | -1.8 | 1.4  |      |
| SHOC2      | soc-2 suppressor of clear homolog (C. elegans)                                            |      |      |      |      |      |      |       |       |      |      |      |      |
| SIAH1      | seven in absentia homolog 1 (Drosophila)                                                  |      |      | -1.3 |      | -1.3 |      | -1.5  | -1.5  |      |      | 2.7  | 1.5  |
| SIAH2      | seven in absentia homolog 2 (Drosophila)                                                  | -1.4 | -1.4 | -1.4 | -1.4 | -1.3 |      |       |       |      |      |      |      |
| SIAHBP1    | fuse-binding protein-interacting repressor                                                |      |      |      |      | -1.3 |      |       |       | -1.2 | -1.2 | -1.4 | -1.4 |
| SIM2       | single-minded homolog 2 (Drosophila)                                                      | 1.3  |      | 1.3  |      | 1.3  |      | 2.4   | 2.4   |      |      | -3.1 | -3.1 |
| SIP1       | survival of motor neuron protein interacting protein 1                                    |      |      |      |      | -1.9 |      |       |       | -1.2 |      | -1.5 | -1.5 |
| SIPA1      | signal-induced proliferation-associated gene 1                                            | 1.2  |      |      |      |      |      | -4.6  | -4.6  | -1.3 |      | 4.9  | 4.9  |
| SIT        | signaling threshold regulating transmembrane adaptor 1                                    |      |      |      |      | -1.2 |      | -18.5 | -18.5 |      |      |      |      |
| SIVA       | SIVA1, apoptosis-inducing factor                                                          | -1.4 |      | -1.3 |      | -1.3 |      | -1.6  | -1.6  | -1.7 | -1.7 | -2.9 | -2.9 |
| SKI        | v-ski sarcoma viral oncogene homolog (avian)                                              |      |      |      |      | 1.5  |      | 7.9   | 7.9   |      |      | -5.0 | -5.0 |
| SKIIP      | SNW domain containing 1                                                                   |      |      |      |      |      |      |       |       |      |      | 1.3  | 1.3  |
| SKIP (C62) | skeletal muscle and kidney enriched inositol phosphatase                                  |      |      |      |      | 1.3  |      | -1.7  | -1.7  | 1.3  |      | 2.3  | 2.3  |
| SKIV2L     | superkiller viralicidal activity 2-like (S. cerevisiae)                                   |      |      |      |      |      |      |       |       |      |      |      |      |
| SKP1A      | S-phase kinase-associated protein 1A (p19A)                                               | -1.3 |      |      |      | -1.4 |      |       |       |      |      | -1.5 | -1.5 |
| SLA        | Src-like-adaptor                                                                          | 2.8  | 2.8  | 3.1  | 3.1  | 3.1  | 3.1  | 2.1   | 2.1   | 4.4  | 4.4  | 10.8 | 10.8 |
| SLBP       | stem-loop (histone) binding protein                                                       |      |      |      |      | -1.7 |      | -1.8  | -1.8  | -1.3 | -1.3 | -1.8 | -1.8 |
| SLC11A2    | solute carrier family 11 (proton-coupled divalent metal ion transporters), member 2       | 1.4  |      | 1.3  |      |      |      | 2.1   | 2.1   | -2.1 | -2.1 | -2.1 | -2.1 |
| SLC12A2    | solute carrier family 12 (sodium/potassium/chloride transporters), member 2               | 1.3  |      |      |      |      |      | -1.9  | -1.9  | -1.8 | -1.8 | 1.9  | 1.9  |



|         |                                                                                                   |      |      |      |      |      |      |      |      |      |      |      |      |     |       |       |
|---------|---------------------------------------------------------------------------------------------------|------|------|------|------|------|------|------|------|------|------|------|------|-----|-------|-------|
| SMARCD1 | SWI/SNF related, matrix associated, actin dependent regulator of chromatin, subfamily d, member 1 |      |      |      |      |      |      |      |      | -1.9 | -1.9 | -1.3 |      |     | 1.7   | 1.7   |
| SMARCD2 | SWI/SNF related, matrix associated, actin dependent regulator of chromatin, subfamily d, member 2 |      |      |      |      |      |      |      |      | 1.3  | 1.3  | -1.2 | -1.2 |     |       |       |
| SMARCE1 | SWI/SNF related, matrix associated, actin dependent regulator of chromatin, subfamily e, member 1 |      |      |      |      |      |      |      |      | -2.2 | -2.2 |      |      |     | 2.0   | 2.0   |
| SMC1L1  | structural maintenance of chromosomes 1A                                                          | 1.4  |      | -1.2 |      |      |      |      |      | -2.2 | -2.2 | -1.2 | -1.2 |     |       |       |
| SMC2L1  | structural maintenance of chromosomes 2                                                           |      |      | 1.3  |      |      |      |      |      | -2.3 | -2.3 | 1.3  | 1.3  |     | -1.3  | -1.3  |
| SMC4L1  | structural maintenance of chromosomes 4                                                           | 1.7  | 1.7  | 1.9  |      | 1.7  | 1.7  |      |      | -1.5 | -1.5 | 2.0  | 1.4  |     | 6.8   | 6.8   |
| SMC5L1  | structural maintenance of chromosomes 5                                                           | 1.2  |      |      |      |      |      |      |      |      |      | 1.2  |      |     | -1.5  | -1.5  |
| SMG1    | PI-3-kinase-related kinase SMG-1                                                                  |      |      |      |      |      |      | -1.2 |      | -1.8 | -1.8 | -1.2 |      |     | 1.8   | 1.8   |
| SMN1    | survival of motor neuron 1, telomeric                                                             | -1.6 | -1.6 | -1.4 |      |      |      | -1.8 |      |      |      | -1.2 |      |     | -1.7  | -1.7  |
| SMNDC1  | survival motor neuron domain containing 1                                                         |      |      |      |      |      |      | -1.2 |      | 1.6  | 1.6  |      |      |     | -1.5  | -1.5  |
| SMOX    | spermine oxidase                                                                                  |      |      |      |      |      |      | 10.6 |      | -1.4 |      |      | 2.1  | 2.1 | 2.7   | 2.7   |
| SMPD1   | sphingomyelin phosphodiesterase 1, acid lysosomal (acid sphingomyelinase)                         | 2.3  | 2.3  | 2.8  | 2.8  | 1.3  |      |      |      |      |      |      |      |     |       |       |
| SMPD2   | sphingomyelin phosphodiesterase 2, neutral membrane (neutral sphingomyelinase)                    |      |      |      |      |      |      |      |      |      |      |      |      |     |       |       |
| SMPD4   | sphingomyelin phosphodiesterase 4, neutral membrane (neutral sphingomyelinase-3)                  |      |      | -1.2 |      |      |      | -1.2 |      | -1.4 | -1.4 |      |      |     |       |       |
| SMPDL3B | sphingomyelin phosphodiesterase, acid-like 3B                                                     |      |      |      |      |      |      |      |      |      |      |      |      |     | -43.6 | -43.6 |
| SMS     | spermine synthase                                                                                 | 1.2  |      |      |      | -1.2 |      |      |      |      |      | -1.4 | -1.4 |     |       |       |
| SMTN    | smoothelin                                                                                        | 1.9  | 1.9  |      |      |      |      |      |      |      |      |      | 2.0  | 2.0 |       |       |
| SMURF2  | SMAD specific E3 ubiquitin protein ligase 2                                                       | 1.4  |      |      |      |      |      |      |      | 1.6  | 1.6  | 1.6  | 1.6  |     | 1.5   | 1.5   |
| SMYD5   | SMYD family member 5                                                                              | -1.4 |      | -1.8 | -1.8 | -1.3 |      |      |      |      |      |      |      |     |       |       |
| SNAP23  | synaptosomal-associated protein, 23kDa                                                            | 1.3  |      | 1.4  |      |      |      |      |      |      |      |      |      |     | 1.5   | 1.5   |
| SNAPC1  | small nuclear RNA activating complex, polypeptide 1, 43kDa                                        | -1.4 |      |      |      |      |      | -1.5 |      | -1.3 |      | -1.5 | -1.5 |     | -1.2  |       |
| SNAPC2  | small nuclear RNA activating complex, polypeptide 2, 45kDa                                        |      |      |      |      |      |      | 1.5  |      |      |      |      |      |     |       |       |
| SNAPC3  | small nuclear RNA activating complex, polypeptide 3, 50kDa                                        |      |      |      |      |      |      | -1.3 |      | -3.2 | -3.2 | 1.3  | 1.3  |     | 3.3   | 3.3   |
| SNAPC5  | small nuclear RNA activating complex, polypeptide 5, 19kDa                                        | 1.4  | 1.4  |      |      |      |      | -1.5 | -1.5 |      |      | -1.2 |      |     | -1.7  | -1.7  |
| SND1    | staphylococcal nuclease and tudor domain containing 1                                             |      |      |      |      |      |      |      |      | -1.3 | -1.3 |      |      |     |       |       |
| SNF1LK  | SNF1-like kinase                                                                                  |      |      |      |      |      |      |      |      |      |      |      |      |     | 2.5   | 2.5   |
| SNF1LK2 | SNF1-like kinase 2                                                                                |      |      |      |      |      |      | 1.7  | 1.7  | -1.2 |      |      |      |     |       |       |
| SNRK    | SNF related kinase                                                                                | 1.3  |      | 1.8  | 1.8  | -1.2 |      |      |      | 1.2  | 1.2  | 1.3  |      |     | 1.3   |       |
| SNRP70  | small nuclear ribonucleoprotein 70kDa polypeptide (RNP antigen)                                   |      |      | -1.4 | -1.4 | -1.4 |      |      |      |      |      | -1.5 | -1.5 |     | -1.4  | -1.4  |
| SNRPA   | small nuclear ribonucleoprotein polypeptide A                                                     |      |      |      |      |      |      |      |      |      |      | -1.9 | -1.9 |     | -1.8  | -1.8  |
| SNRPA1  | small nuclear ribonucleoprotein polypeptide A'                                                    | -1.3 |      | -1.3 | -1.3 | -1.5 |      |      |      | -1.4 | -1.4 | -1.4 | -1.4 |     | -2.4  | -2.4  |
| SNRPB   | small nuclear ribonucleoprotein polypeptides B and B1                                             |      |      | -1.2 |      |      |      |      |      | -1.6 | -1.6 | -1.7 | -1.7 |     | -2.4  | -2.4  |
| SNRPB2  | small nuclear ribonucleoprotein polypeptide B''                                                   |      |      | -1.3 | -1.3 | -1.3 |      |      |      | -1.6 | -1.6 | -1.4 |      |     | 1.7   | 1.7   |
| SNRPC   | small nuclear ribonucleoprotein polypeptide C                                                     |      |      |      |      |      |      |      |      | -1.3 | -1.3 | -1.5 | -1.5 |     | -1.3  | -1.3  |
| SNRPD1  | small nuclear ribonucleoprotein D1 polypeptide 16kDa                                              | -1.4 | -1.4 | -3.0 | -3.0 |      |      |      |      | -1.9 | -1.9 | -1.7 | -1.7 |     | -2.0  | -2.0  |
| SNRPD2  | small nuclear ribonucleoprotein D2 polypeptide 16.5kDa                                            |      |      |      |      |      |      |      |      | -1.2 | -1.2 | -1.2 | -1.2 |     |       |       |
| SNRPD3  | small nuclear ribonucleoprotein D3 polypeptide 18kDa                                              |      |      |      |      |      |      |      |      | -1.6 | -1.6 |      |      |     | -1.4  | -1.4  |
| SNRPE   | small nuclear ribonucleoprotein polypeptide E                                                     |      |      | -1.4 |      |      |      | -1.2 |      | -1.3 | -1.3 | -1.3 | -1.3 |     |       |       |
| SNRPG   | small nuclear ribonucleoprotein polypeptide G                                                     |      |      |      |      |      |      | -1.3 |      |      |      |      |      |     | -1.8  | -1.8  |
| SNRPN   | small nuclear ribonucleoprotein polypeptide N                                                     | 1.3  |      |      |      |      |      |      |      |      |      | 1.2  | -1.2 |     | 1.5   | 1.5   |
| SNTA1   | syntrophin, alpha 1 (dystrophin-associated protein A1, 59kDa, acidic component)                   | 1.4  |      | 1.4  | 1.4  |      |      |      |      |      |      |      |      |     |       |       |
| SNTB2   | syntrophin, beta 2 (dystrophin-associated protein A1, 59kDa, basic component 2)                   | 3.0  | 3.0  | 2.9  | 2.9  | 2.3  | 2.3  |      |      | -5.9 | -5.9 | 3.5  | 3.5  |     | 8.7   | 8.7   |
| SNX1    | sorting nexin 1                                                                                   |      |      |      |      |      |      |      |      | 3.6  | 3.6  | -1.4 |      |     | -2.4  | -2.4  |
| SNX17   | sorting nexin 17                                                                                  |      |      |      |      |      |      |      |      |      |      |      |      |     |       |       |
| SNX19   | sorting nexin 19                                                                                  |      |      | 1.2  |      |      |      |      |      |      |      |      |      |     | 1.7   | 1.7   |
| SNX2    | sorting nexin 2                                                                                   |      |      | -1.3 |      |      |      | -1.3 |      | -1.6 | -1.6 | -1.4 | -1.4 |     | 1.4   | 1.4   |
| SNX3    | sorting nexin 3                                                                                   |      |      |      |      |      |      |      |      | 1.3  | 1.3  | -1.5 | -1.5 |     |       |       |
| SNX4    | sorting nexin 4                                                                                   |      |      | 1.6  |      |      |      | -1.5 | -1.5 | -1.2 | -1.2 | 1.6  |      |     | 1.3   | 1.3   |
| SOCS1   | suppressor of cytokine signaling 1                                                                | 15.6 | 15.6 | 9.9  | 9.9  | 29.3 | 29.3 |      |      | -1.6 | -1.6 | 8.3  | 8.3  |     | 40.4  | 40.4  |
| SOCS2   | suppressor of cytokine signaling 2                                                                |      |      |      |      |      |      | 2.8  | 2.8  | -1.8 | -1.8 | 2.8  | 2.8  |     | 4.7   | 4.7   |
| SOCS5   | suppressor of cytokine signaling 5                                                                |      |      |      |      |      |      |      |      | 1.7  | 1.7  | 1.3  | 1.3  |     |       |       |
| SOCS6   | suppressor of cytokine signaling 6                                                                |      |      | -1.3 |      |      |      | -1.9 |      | 1.3  | 1.3  | 1.9  | 1.9  |     |       |       |
| SOD1    | superoxide dismutase 1, soluble (amyotrophic lateral sclerosis 1 (adult))                         |      |      | -1.2 |      |      |      |      |      |      |      |      |      |     | -1.6  | -1.6  |
| SON     | SON DNA binding protein                                                                           |      |      | 1.5  |      |      |      | -1.3 |      | 1.2  |      | 1.7  | 1.7  |     |       |       |
| SORD    | sorbitol dehydrogenase                                                                            | -1.4 |      | -1.8 | -1.8 | -1.5 |      |      |      | -1.3 | -1.3 | -1.6 | -1.6 |     | -2.9  | -2.9  |
| SOSTDC1 | sclerostin domain containing 1                                                                    | -1.8 |      | -1.9 | -1.9 |      |      |      |      |      |      |      |      |     |       |       |
| SOX4    | SRY (sex determining region Y)-box 4                                                              | -1.2 |      |      |      |      |      | -1.9 |      | -5.7 | -5.7 | -1.5 | -1.3 |     | 3.0   | 3.0   |
| SP100   | SP100 nuclear antigen                                                                             |      |      | 1.4  |      |      |      |      |      | -1.9 | -1.7 | 2.3  | 2.3  |     | 6.4   | 6.4   |





|         |                                                                                         |      |      |      |      |      |      |       |       |      |      |       |       |
|---------|-----------------------------------------------------------------------------------------|------|------|------|------|------|------|-------|-------|------|------|-------|-------|
| SUMO2   | SMT3 suppressor of mif two 3 homolog 2 (S. cerevisiae)                                  |      |      |      |      |      |      | 3.0   | 3.0   | 1.4  |      | -3.1  | -3.1  |
| SUMO3   | SMT3 suppressor of mif two 3 homolog 3 (S. cerevisiae)                                  |      |      |      |      |      |      | -1.3  |       | -1.3 | -1.3 | -1.4  | -1.4  |
| SUMO4   | SMT3 suppressor of mif two 3 homolog 4 (S. cerevisiae)                                  |      |      |      |      |      |      |       |       |      |      |       |       |
| SUPT3H  | suppressor of Ty 3 homolog (S. cerevisiae)                                              | 1.3  |      |      |      |      |      | -6.4  | -6.4  |      |      | 10.6  | 10.6  |
| SUPT4H1 | suppressor of Ty 4 homolog 1 (S. cerevisiae)                                            |      |      |      |      |      |      | -1.7  | -1.7  | 1.6  | 1.6  | 2.0   | 2.0   |
| SUPT5H  | suppressor of Ty 5 homolog (S. cerevisiae)                                              |      |      |      | 1.2  |      |      |       |       |      |      |       |       |
| SUPT6H  | suppressor of Ty 6 homolog (S. cerevisiae)                                              |      |      |      |      |      |      | 1.8   | 1.8   | 1.5  |      | 1.8   | -1.5  |
| SURB7   | SRB7 suppressor of RNA polymerase B homolog (yeast)                                     |      | 1.6  | 1.6  | -1.3 |      |      | 1.3   |       |      |      | -1.4  | -1.4  |
| SURF1   | surfeit 1                                                                               |      |      |      |      |      |      |       |       |      |      |       |       |
| SURF5   | surfeit 5                                                                               | -1.2 |      |      |      |      |      | -1.4  | -1.4  |      |      |       |       |
| SUZ12   | suppressor of zeste 12 homolog (Drosophila)                                             |      |      |      |      | -1.3 |      |       |       | -1.3 |      | -1.8  | -1.8  |
| SV2A    | synaptic vesicle glycoprotein 2A                                                        | 1.7  | 1.7  | 1.8  | 1.8  | 1.4  | 1.4  | 10.1  | 10.1  | 1.9  | 1.9  | -14.8 | -14.8 |
| SWAP70  | SWAP-70 protein                                                                         | 1.3  | 1.3  | 1.4  |      |      |      | -1.3  | -1.3  | 1.4  | 1.4  | 1.6   | 1.6   |
| SYBL1   | synaptobrevin-like 1                                                                    |      |      |      |      |      |      |       |       | 1.3  | 1.3  | 1.2   | 1.2   |
| SYCP1   | synaptonemal complex protein 1                                                          |      |      |      |      | 2.9  | 2.9  |       |       |      |      |       | 1.5   |
| SYMPK   | symplekin                                                                               |      |      |      |      |      |      |       |       |      | -1.7 | -1.7  | -1.5  |
| SYNCRIP | synaptotagmin binding, cytoplasmic RNA interacting protein                              | -1.3 |      | -1.5 | -1.5 | -1.4 | -1.4 | -1.7  | -1.7  | -1.6 | -1.6 | -1.9  | -1.9  |
| SYNE1   | spectrin repeat containing, nuclear envelope 1                                          |      |      |      |      | 1.2  |      |       |       |      |      |       |       |
| SYNE2   | spectrin repeat containing, nuclear envelope 2                                          | 1.5  | 1.5  |      |      | -1.5 |      | -10.7 | -10.7 | 6.9  | 6.9  | 38.9  | 38.9  |
| SYNGR2  | synaptogyrin 2                                                                          |      |      |      |      |      |      | 1.9   | 1.9   |      |      | -2.4  | -2.4  |
| SYNJ1   | synaptojanin 1                                                                          | 1.5  |      | 1.8  |      |      |      | -1.3  |       | 1.2  |      |       |       |
| SYNJ2   | synaptojanin 2                                                                          | 1.9  | 1.9  | 2.4  | 2.4  | 1.5  |      | -13.7 | -13.7 |      |      | 48.6  | 48.6  |
| SYNPO   | synaptopodin                                                                            | 1.2  |      |      |      | 1.9  |      |       |       |      |      |       |       |
| SYPL    | synaptophysin-like 1                                                                    |      |      |      |      |      |      | 1.3   |       |      |      | -1.9  | -1.9  |
| SYT1    | synaptotagmin I                                                                         | 1.7  |      |      |      |      |      | -16.7 | -16.7 | -1.5 | -1.5 | 12.7  | 12.7  |
| T       | T, brachyury homolog (mouse)                                                            | 1.2  |      | 1.5  |      | 1.6  |      |       |       |      |      |       |       |
| TACC1   | transforming, acidic coiled-coil containing protein 1                                   |      |      |      |      |      |      | 2.5   | 2.5   | 1.6  |      | 1.7   | 1.7   |
| TADA3L  | transcriptional adaptor 3 (NGG1 homolog, yeast)-like                                    |      |      | 1.4  | 1.4  |      |      |       |       |      |      | 1.3   | 1.3   |
| TAF1    | TAF1 RNA polymerase II, TATA box binding protein (TBP)-associated factor, 250kDa        |      |      | 1.7  |      |      |      | 1.9   | 1.9   | 1.2  |      | -1.4  | -1.4  |
| TAF10   | TAF10 RNA polymerase II, TATA box binding protein (TBP)-associated factor, 30kDa        |      |      |      |      |      |      | -1.4  | -1.4  |      |      | 1.4   | 1.4   |
| TAF11   | TAF11 RNA polymerase II, TATA box binding protein (TBP)-associated factor, 28kDa        | 1.3  |      | 1.8  | 1.8  |      |      |       |       | 1.2  | 1.2  | -1.2  | -1.2  |
| TAF12   | TAF12 RNA polymerase II, TATA box binding protein (TBP)-associated factor, 20kDa        |      |      | -1.2 |      | -1.3 |      |       |       |      |      |       |       |
| TAF15   | TAF15 RNA polymerase II, TATA box binding protein (TBP)-associated factor, 68kDa        |      |      |      |      |      |      | 1.6   | 1.6   | -1.4 | -1.4 | -1.7  | -1.7  |
| TAF1A   | TATA box binding protein (TBP)-associated factor, RNA polymerase I, A, 48kDa            |      |      |      |      | -1.4 |      | -2.1  | -2.1  | -1.8 | -1.8 |       |       |
| TAF1C   | TATA box binding protein (TBP)-associated factor, RNA polymerase I, C, 110kDa           |      |      |      |      |      |      | 1.8   | 1.8   |      |      | -1.6  | -1.6  |
| TAF2    | TAF2 RNA polymerase II, TATA box binding protein (TBP)-associated factor, 150kDa        |      |      |      |      |      |      | -1.3  | -1.3  | -1.7 |      | 1.6   | 1.6   |
| TAF4    | TAF4 RNA polymerase II, TATA box binding protein (TBP)-associated factor, 135kDa        |      |      | 1.3  |      | 1.2  |      |       |       |      |      | -1.2  |       |
| TAF4B   | TAF4b RNA polymerase II, TATA box binding protein (TBP)-associated factor, 105kDa       |      |      |      |      |      |      | -1.3  | -1.3  |      |      | -2.3  | -2.3  |
| TAF5    | TAF5 RNA polymerase II, TATA box binding protein (TBP)-associated factor, 100kDa        |      |      |      |      |      |      |       |       | -1.4 | -1.4 | -1.7  | -1.7  |
| TAF5L   | TAF5-like RNA polymerase II, p300/CBP-associated factor (PCAF)-associated factor, 65kDa |      |      | -1.3 |      |      |      | -1.4  |       |      |      |       |       |
| TAF6    | TAF6 RNA polymerase II, TATA box binding protein (TBP)-associated factor, 80kDa         |      |      |      |      |      |      | -1.4  |       |      |      | 1.4   |       |
| TAF6L   | TAF6-like RNA polymerase II, p300/CBP-associated factor (PCAF)-associated factor, 65kDa |      |      | -1.2 |      | 1.3  |      |       |       |      |      | -1.4  |       |
| TAF7    | TAF7 RNA polymerase II, TATA box binding protein (TBP)-associated factor, 55kDa         |      |      | 1.5  | 1.5  |      |      |       |       |      |      | 1.3   | 1.3   |
| TAF9    | TAF9 RNA polymerase II, TATA box binding protein (TBP)-associated factor, 32kDa         |      |      | -1.3 |      |      |      | 2.2   | 2.2   |      |      | -3.2  | -3.2  |
| TAGLN2  | transgelin 2                                                                            | -1.4 | -1.4 | -2.0 | -2.0 | -1.3 |      | -3.0  | -3.0  |      |      | -1.3  |       |
| TAGLN3  | transgelin 3                                                                            | 1.3  |      |      |      |      |      |       |       |      |      |       |       |
| TAL1    | T-cell acute lymphocytic leukemia 1                                                     | 1.6  | 1.6  |      |      |      |      | 1.7   | 1.7   |      |      | -2.3  | -2.3  |
| TALDO1  | transaldolase 1                                                                         |      |      |      |      |      |      | 1.8   | 1.8   | 1.4  |      | -1.7  | -1.7  |
| TANK    | TRAF family member-associated NFKB activator                                            |      |      |      |      |      |      | 2.1   | 2.1   | 1.4  | 1.4  | -1.3  | -1.3  |
| TAOK3   | TAO kinase 3                                                                            | 1.3  |      |      |      |      |      | 2.3   | 2.3   | -1.4 | -1.4 | -2.9  | -2.9  |
| TAP1    | transporter 1, ATP-binding cassette, sub-family B (MDR/TAP)                             |      |      | 1.6  | 1.6  | 1.7  |      |       |       |      | 1.9  | 1.9   |       |
| TAPBP   | TAP binding protein (tapasin)                                                           |      |      |      |      |      |      | -1.8  | -1.8  | -1.3 | -1.3 | 1.2   | 1.2   |
| TARBP1  | Tar (HIV-1) RNA binding protein 1                                                       | -1.6 | -1.6 | -1.6 | -1.6 | -1.8 | -1.8 | 1.3   |       | -1.3 |      | -3.5  | -3.5  |
| TARBP2  | Tar (HIV-1) RNA binding protein 2                                                       |      |      | -1.5 |      |      |      |       |       | -1.4 | -1.4 |       |       |
| TARDBP  | TAR DNA binding protein                                                                 |      |      | -1.2 | -1.2 | -1.3 |      | 1.9   | 1.9   | -1.5 | -1.2 | -1.3  | -1.3  |
| TARS    | threonyl-tRNA synthetase                                                                |      |      | -1.5 | -1.5 | -1.6 | -1.6 | 1.4   |       | -1.9 | -1.9 | -1.8  | -1.8  |
| TAX1BP1 | Tax1 (human T-cell leukemia virus type I) binding protein 1                             | 1.5  | 1.5  | 1.7  | 1.7  |      |      | 4.5   | 4.5   | 1.4  | 1.4  | -2.6  | -2.6  |
| TAX1BP3 | Tax1 (human T-cell leukemia virus type I) binding protein 3                             | 1.6  |      | 1.5  | 1.5  | 1.4  |      | -2.1  | -2.1  | 3.3  | 3.3  | 4.2   | 4.2   |







|         |                                                                                       |      |      |      |      |      |      |       |       |      |      |      |      |       |       |
|---------|---------------------------------------------------------------------------------------|------|------|------|------|------|------|-------|-------|------|------|------|------|-------|-------|
| TRIM37  | tripartite motif-containing 37                                                        |      |      |      | -1.2 |      |      | -1.3  |       | 1.8  | 1.8  | -1.3 | -1.3 | -14.1 | -14.1 |
| TRIM44  | tripartite motif-containing 44                                                        | -1.3 |      |      |      |      |      | -1.3  |       | -1.2 |      |      |      |       |       |
| TRIM9   | tripartite motif-containing 9                                                         |      |      |      |      |      |      |       |       |      |      | 1.7  | 1.7  |       |       |
| TRIP    | TRAF interacting protein                                                              |      |      |      |      |      |      |       |       |      |      |      |      |       |       |
| TRIP12  | thyroid hormone receptor interactor 12                                                | 1.4  |      |      | 1.5  | 1.5  |      |       |       | 1.6  | 1.6  | 1.5  | 1.5  | 2.3   | 2.3   |
| TRIP13  | thyroid hormone receptor interactor 13                                                | -1.5 | -1.5 | -1.4 | -1.4 | -1.6 | -1.6 | 1.2   |       |      |      |      |      | -2.4  | -2.4  |
| TROAP   | trophinin associated protein (tastin)                                                 | 1.5  | 1.5  |      |      |      |      |       |       |      |      |      |      |       |       |
| TRPC4AP | transient receptor potential cation channel, subfamily C, member 4 associated protein |      |      |      |      |      |      |       |       |      |      |      |      |       |       |
| TRRAP   | transformation/transcription domain-associated protein                                |      |      |      |      |      |      |       |       | -1.7 | -1.7 |      |      | 2.1   | 2.1   |
| TSC1    | tuberous sclerosis 1                                                                  | 1.5  | 1.5  |      |      |      |      |       |       |      |      | 1.2  |      |       |       |
| TSC2    | tuberous sclerosis 2                                                                  |      |      |      |      |      |      |       |       | -1.8 | -1.8 | 1.5  | 1.5  | 6.8   | 6.8   |
| TSC22D1 | TSC22 domain family, member 1                                                         | 1.3  |      |      |      |      |      |       |       | 2.0  | 2.0  | 2.9  | 2.9  | -2.4  | -2.4  |
| TSC22D3 | TSC22 domain family, member 3                                                         | 33.1 | 33.1 | 74.0 | 74.0 | 20.4 | 20.4 | 5.2   | 5.2   | 17.5 | 17.5 | 20.0 | 20.0 | 20.0  | 20.0  |
| TSC22D4 | TSC22 domain family, member 4                                                         |      |      |      |      |      |      |       |       |      |      | 1.4  |      | 2.8   | 2.8   |
| TSMF    | Ts translation elongation factor, mitochondrial                                       | -1.5 | -1.5 | -1.4 | -1.4 | -1.6 | -1.6 | -1.2  | -1.2  | -2.5 | -2.5 | -2.5 | -2.5 | -1.6  | -1.6  |
| TSG101  | tumor susceptibility gene 101                                                         |      |      |      |      |      |      | -1.2  |       |      |      |      |      | 1.6   | 1.6   |
| TSHR    | thyroid stimulating hormone receptor                                                  |      |      |      |      |      |      | -4.1  | -4.1  |      |      |      |      |       |       |
| TSN     | translin                                                                              |      |      |      |      |      |      |       |       |      |      | -1.3 | -1.3 | -1.4  | -1.4  |
| TSNAX   | translin-associated factor X                                                          | 2.1  | 2.1  | 2.6  | 2.6  | 2.2  | 2.2  | 1.2   | 1.2   | 1.9  | 1.9  | 1.9  | 1.9  | 2.0   | 2.0   |
| TSPAN5  | tetraspanin 5                                                                         | 2.1  | 2.1  | 1.9  | 1.9  |      |      | 3.2   | 3.2   |      |      |      |      | -1.5  |       |
| TSPYL2  | TSPY-like 2                                                                           | 1.3  |      | 1.6  | 1.6  | 2.4  | 2.4  |       |       |      |      |      |      |       |       |
| TSR1    | TSR1, 20S rRNA accumulation, homolog (S. cerevisiae)                                  | -2.0 | -2.0 | -1.6 |      | -2.0 | -2.0 | -2.0  | -2.0  | -2.4 | -2.4 | -2.4 | -2.4 | -1.8  | -1.8  |
| TSTA3   | tissue specific transplantation antigen P35B                                          |      |      |      |      |      | 1.3  |       |       |      |      | 1.6  | 1.6  | -1.3  |       |
| TTC1    | tetratricopeptide repeat domain 1                                                     |      |      |      |      |      |      |       |       |      |      |      |      |       |       |
| TTC3    | tetratricopeptide repeat domain 3                                                     | -1.4 |      | -1.2 |      | -1.2 |      | 2.3   | 2.3   | -1.6 | -1.6 | -1.6 | -1.6 | -5.1  | -5.1  |
| TTF1    | transcription termination factor, RNA polymerase I                                    |      |      | 1.6  |      |      |      | -2.7  | -2.7  | -1.3 | -1.3 | -1.3 | -1.3 | 1.8   | 1.8   |
| TTF2    | transcription termination factor, RNA polymerase II                                   |      |      | -1.4 | -1.4 | -1.2 |      | -1.2  | -1.2  |      |      |      |      | 1.2   |       |
| TTK     | TTK protein kinase                                                                    |      |      | -1.4 |      | -1.2 |      |       |       |      |      | 1.3  | 1.3  |       |       |
| TLL12   | tubulin tyrosine ligase-like family, member 12                                        | -1.4 | -1.4 | -1.4 | -1.4 | -1.3 |      |       |       | -2.7 | -2.7 | -2.7 | -2.7 | -4.9  | -4.9  |
| TTN     | titin                                                                                 |      |      |      |      |      |      |       |       |      |      | -1.4 | -1.4 | -8.8  | -8.8  |
| TTRAP   | TRAF and TNF receptor associated protein                                              |      |      | 1.3  |      |      |      |       |       |      |      |      |      |       |       |
| TUB     | tubby homolog (mouse)                                                                 |      |      |      |      |      |      |       |       |      |      |      |      |       |       |
| TUBA1   | tubulin, alpha 1                                                                      | 10.4 | 10.4 | 8.9  | 8.9  | 3.0  | 3.0  | -4.4  | -4.4  | 2.1  | 2.1  | 2.1  | 2.1  | 13.5  | 13.5  |
| TUBA2   | tubulin, alpha 2                                                                      | 1.2  |      | 1.3  | 1.3  | 3.6  | 3.6  | -1.4  |       |      |      |      |      |       |       |
| TUBA3   | tubulin, alpha 3                                                                      |      |      |      |      | -1.6 | -1.6 | -10.6 | -10.6 | 1.7  | 1.7  | 1.7  | 1.7  | 15.1  | 15.1  |
| TUBB    | tubulin, beta                                                                         | -1.4 |      |      |      | 1.3  |      | -1.6  | -1.6  |      |      |      |      |       |       |
| TUBB2A  | tubulin, beta 2A                                                                      |      |      |      |      | -1.4 |      | -25.5 | -25.5 | 3.2  | 3.2  | 3.2  | 3.2  | 54.6  | 54.6  |
| TUBB2B  | tubulin, beta 2B                                                                      |      |      | -1.3 |      |      |      | -1.2  |       | 1.8  |      |      |      | 1.3   |       |
| TUBB2C  | tubulin, beta 2C                                                                      |      |      |      |      |      |      | -1.3  | -1.3  | 1.4  | 1.4  | 1.4  | 1.4  |       |       |
| TUBB3   | tubulin, beta 3                                                                       |      |      |      |      |      |      | -1.8  | -1.8  |      |      |      |      |       |       |
| TUBG1   | tubulin, gamma 1                                                                      |      |      |      |      | -1.4 | -1.4 |       |       |      |      |      |      | -3.2  | -3.2  |
| TUBGCP2 | tubulin, gamma complex associated protein 2                                           |      |      |      |      | 1.6  | -1.4 |       |       | -1.3 | -1.3 | -1.3 | -1.3 | -1.5  | -1.5  |
| TUBGCP3 | tubulin, gamma complex associated protein 3                                           |      |      |      |      |      |      | -1.4  | -1.4  | -1.3 | -1.3 | -1.3 | -1.3 | -1.7  | -1.7  |
| TUFM    | Tu translation elongation factor, mitochondrial                                       | -1.2 |      | -1.4 | -1.4 | -1.3 | -1.3 | -1.5  | -1.5  | -1.5 | -1.5 | -1.5 | -1.5 |       |       |
| TUSC3   | tumor suppressor candidate 3                                                          |      |      | -1.9 |      |      |      |       |       |      |      |      |      |       |       |
| TWF1    | twinfilin, actin-binding protein, homolog 1 (Drosophila)                              |      |      |      |      |      |      |       |       |      |      |      |      |       |       |
| TXK     | TXK tyrosine kinase                                                                   |      |      |      |      | 1.6  |      |       |       |      |      |      |      |       |       |
| TXLNA   | taxilin alpha                                                                         | -1.3 |      | -1.4 | -1.4 |      |      | 1.2   | 1.2   |      |      |      |      | -2.0  | -2.0  |
| TXN     | thioredoxin                                                                           |      |      | 1.6  | 1.6  | 1.7  | 1.7  | 1.8   | 1.8   | 1.3  | 1.3  | 1.3  | 1.3  | -1.5  | -1.5  |
| TXN2    | thioredoxin 2                                                                         | -1.3 |      |      |      |      |      | -1.4  | -1.4  |      |      |      |      | -1.3  |       |
| TXNDC1  | thioredoxin domain containing 1                                                       |      |      | -1.3 |      |      |      |       |       |      |      | -1.6 | -1.6 | -2.0  | -2.0  |
| TXNDC9  | thioredoxin domain containing 9                                                       |      |      |      |      | -1.3 |      | 1.5   | 1.5   |      |      |      |      | -1.2  | -1.2  |
| TXNIP   | thioredoxin interacting protein                                                       | 2.8  | 2.8  | 3.4  | 3.4  | 3.7  | 3.7  | 10.0  | 10.0  | 7.7  | 7.7  | 7.7  | 7.7  | 2.1   | 2.1   |
| TXNL1   | thioredoxin-like 1                                                                    |      |      | -1.2 |      | -1.4 |      | 1.3   | 1.3   | -2.1 | -2.1 | -2.1 | -2.1 | -1.4  | -1.4  |
| TXNRD1  | thioredoxin reductase 1                                                               | -1.3 |      | -1.4 | -1.4 | -1.4 | -1.4 | -1.3  | -1.3  | -1.3 | -1.3 | -1.3 | -1.3 |       |       |
| TYK2    | tyrosine kinase 2                                                                     | 1.4  |      |      |      | 1.2  |      |       |       |      |      |      |      |       |       |
| TYMS    | thymidylate synthetase                                                                |      |      |      |      |      |      | 2.1   | 2.1   | -1.2 | -1.2 | -1.2 | -1.2 | -4.8  | -4.8  |
| TYRO3   | TYRO3 protein tyrosine kinase                                                         | -1.2 | -1.2 |      |      | -1.7 | -1.7 | -1.9  | -1.9  |      |      |      |      | 1.8   |       |



|        |                                                                        |      |      |      |      |      |      |      |        |        |      |      |       |       |
|--------|------------------------------------------------------------------------|------|------|------|------|------|------|------|--------|--------|------|------|-------|-------|
| UROS   | uroporphyrinogen III synthase (congenital erythropoietic porphyria)    |      |      |      |      |      | -1.2 |      | 2.4    | 2.4    | 1.6  | 1.6  | -6.2  | -6.2  |
| USF2   | upstream transcription factor 2, c-fos interacting                     |      |      |      |      |      |      |      | -1.5   | -1.5   |      |      | 1.6   | 1.6   |
| USP1   | ubiquitin specific peptidase 1                                         |      |      |      |      |      | -1.4 | -1.4 | -1.5   | -1.5   |      |      |       |       |
| USP10  | ubiquitin specific peptidase 10                                        |      |      | -1.5 |      |      | -1.7 |      |        |        | -1.7 | -1.7 | -1.6  | -1.6  |
| USP11  | ubiquitin specific peptidase 11                                        |      |      |      |      |      | 1.3  |      | -1.6   | -1.6   | 1.3  | 1.3  | 1.4   | 1.4   |
| USP12  | ubiquitin specific peptidase 12                                        |      |      |      |      |      |      |      | -2.0   | -2.0   | 2.3  | 2.3  | 3.7   | 3.7   |
| USP14  | ubiquitin specific peptidase 14 (tRNA-guanine transglycosylase)        |      |      | -1.4 | -1.4 |      |      |      | 1.3    | 1.3    | -1.3 | -1.3 | -1.7  | -1.7  |
| USP19  | ubiquitin specific peptidase 19                                        |      |      |      |      |      |      |      |        |        |      |      |       |       |
| USP20  | ubiquitin specific peptidase 20                                        | 1.5  | 1.5  | 1.3  | 1.3  |      | 2.1  | 2.1  |        |        |      |      |       |       |
| USP22  | ubiquitin specific peptidase 22                                        |      |      |      |      |      | 1.4  |      | -2.6   | -2.6   |      |      | 2.7   | 2.7   |
| USP24  | ubiquitin specific peptidase 24                                        |      |      |      |      |      |      |      | 1.4    | 1.4    | 1.3  | 1.3  | -1.3  | -1.3  |
| USP32  | ubiquitin specific peptidase 32                                        |      |      |      |      |      |      |      | 3.1    | 3.1    | 1.3  |      | -2.2  | -2.2  |
| USP33  | ubiquitin specific peptidase 33                                        |      |      | 1.3  |      |      |      |      | 1.5    | 1.5    | 1.3  | 1.3  |       |       |
| USP34  | ubiquitin specific peptidase 34                                        |      |      | 1.4  |      |      |      |      | -1.3   | 1.3    | 1.8  | 1.8  | 2.6   | 2.6   |
| USP4   | ubiquitin specific peptidase 4 (proto-oncogene)                        |      |      | 1.3  |      |      |      |      | -1.7   | -1.7   | 1.3  | 1.3  | 2.4   | 2.4   |
| USP46  | ubiquitin specific peptidase 46                                        | -1.3 |      | -1.4 |      |      |      |      | 3.5    | 3.5    | 1.5  |      | -3.0  | -3.0  |
| USP5   | ubiquitin specific peptidase 5 (isopeptidase T)                        |      |      |      |      |      |      |      |        |        |      |      |       |       |
| USP52  | ubiquitin specific peptidase 52                                        | 1.4  |      | 1.4  | 1.4  |      |      |      |        |        | 1.4  |      | 1.5   | 1.5   |
| USP6   | ubiquitin specific peptidase 6 (Tre-2 oncogene)                        |      |      |      |      |      |      |      | 1.4    | 1.4    | -1.3 | -1.3 |       |       |
| USP6NL | USP6 N-terminal like                                                   |      |      |      |      |      | 1.5  | 1.5  |        |        | 2.1  | 2.1  | 1.4   |       |
| USP7   | ubiquitin specific peptidase 7 (herpes virus-associated)               |      |      |      |      |      |      |      | -3.0   | -3.0   |      |      | 2.6   | 2.6   |
| USP8   | ubiquitin specific peptidase 8                                         |      |      | 1.3  |      |      |      |      |        |        | 1.5  | 1.5  | 1.5   | 1.5   |
| USP9X  | ubiquitin specific peptidase 9, X-linked                               |      |      | 1.5  |      |      | 3.4  |      |        |        | 1.4  | 1.4  | 1.3   | 1.3   |
| UTRN   | utrophin                                                               | 1.7  |      | 2.9  | 2.9  |      | 2.5  |      | -1.4   | -1.4   | 1.6  | 1.6  | 2.0   | 2.0   |
| UTX    | ubiquitously transcribed tetratricopeptide repeat, X chromosome        |      |      |      |      |      | -1.3 |      | -1.6   | -1.6   | 1.4  | 1.4  | 2.9   | 2.9   |
| UVRAG  | UV radiation resistance associated gene                                |      |      | 1.4  | 1.4  |      | 1.5  | 1.5  | 1.6    | 1.6    | -1.3 |      |       |       |
| VAMP1  | vesicle-associated membrane protein 1 (synaptobrevin 1)                | 1.3  |      |      |      |      |      |      |        |        | 1.3  | 1.3  | 2.1   | 2.1   |
| VAMP2  | vesicle-associated membrane protein 2 (synaptobrevin 2)                | 1.3  |      |      |      |      |      |      | -4.2   | -4.2   | -1.3 | -1.3 | 4.9   | 4.9   |
| VAMP3  | vesicle-associated membrane protein 3 (cellubrevin)                    |      |      | 1.5  |      |      |      |      | 1.3    | 1.3    | 1.3  | 1.3  | 1.5   | 1.5   |
| VAMP4  | vesicle-associated membrane protein 4                                  | 1.4  |      |      |      |      | -1.4 |      | -2.6   | -2.6   | 1.3  |      | 2.7   | 2.7   |
| VAMP8  | vesicle-associated membrane protein 8 (endobrevin)                     | -1.3 |      | -1.3 | -1.3 |      | -1.2 |      | 2.0    | 2.0    |      |      | -4.1  | -4.1  |
| VAPA   | VAMP (vesicle-associated membrane protein)-associated protein A, 33kDa |      |      |      |      |      | -1.3 |      | 1.7    | 1.3    | -1.4 |      | -2.9  | -1.7  |
| VAPB   | VAMP (vesicle-associated membrane protein)-associated protein B and C  |      |      |      |      |      |      |      | 1.4    |        | 1.2  |      | -1.9  | -1.9  |
| VARS   | valyl-tRNA synthetase                                                  | -1.5 |      | -1.3 |      |      | -1.3 |      | -1.3   |        | -2.1 | -2.1 | -2.1  | -2.1  |
| VASP   | vasodilator-stimulated phosphoprotein                                  | 1.3  |      |      |      |      |      |      | 1.8    | 1.8    | -1.3 | -1.3 | -1.6  | -1.6  |
| VAV1   | vav 1 oncogene                                                         |      |      | -1.3 |      |      |      |      |        |        |      |      | -1.2  | -1.2  |
| VBP1   | von Hippel-Lindau binding protein 1                                    |      |      | -1.3 | -1.3 |      | -1.3 |      |        |        |      |      | 1.2   |       |
| VCL    | vinculin                                                               | 1.8  |      | 1.6  | 1.6  |      | 1.9  | 1.9  | 1.9    | 1.9    | -1.5 | -1.5 | -1.9  | -1.9  |
| VCP    | valosin-containing protein                                             | -1.4 |      |      |      |      |      |      | 1.3    | 1.3    | -1.3 | -1.3 | -1.4  | -1.4  |
| VDAC1  | voltage-dependent anion channel 1                                      | -1.6 | -1.6 | -1.5 | -1.5 |      | -1.7 | -1.7 | 1.6    | 1.6    |      |      | -3.1  | -3.1  |
| VDAC2  | voltage-dependent anion channel 2                                      | -1.3 |      | -1.4 | -1.4 |      | -1.5 | -1.5 | 1.9    | 1.9    |      |      | -2.1  | -2.1  |
| VDAC3  | voltage-dependent anion channel 3                                      |      |      |      |      |      | -1.3 |      | 1.8    | 1.8    |      |      | -1.9  | -1.9  |
| VDP    | vesicle docking protein p115                                           |      |      |      |      |      |      |      | 2.0    | 2.0    | 1.6  |      | -1.6  | -1.6  |
| VEGF   | vascular endothelial growth factor A                                   | -1.5 | -1.5 | -1.6 | -1.6 |      |      |      | 8.2    | 8.2    | -2.4 | -2.4 | -13.8 | -13.8 |
| VEGFB  | vascular endothelial growth factor B                                   | -1.5 |      | -2.3 | -2.3 |      |      |      | -2.5   | -2.5   | -1.5 |      | 1.6   |       |
| VGLL4  | vestigial like 4 (Drosophila)                                          |      |      |      |      |      |      |      | 1.4    | 1.3    |      |      | -1.2  |       |
| VHL    | von Hippel-Lindau tumor suppressor                                     |      |      | 1.8  |      |      |      |      |        |        |      |      |       |       |
| VIL2   | villin 2 (ezrin)                                                       |      |      |      |      |      | -1.2 |      | -2.2   | -2.2   | 2.4  | 2.4  | 9.8   | 9.8   |
| VIM    | vimentin                                                               |      |      | -1.2 |      |      |      |      | -275.9 | -275.9 | 1.2  | 1.2  | 360.4 | 360.4 |
| VKORC1 | vitamin K epoxide reductase complex, subunit 1                         | 1.4  |      |      |      |      |      |      |        |        |      |      |       |       |
| VLDLR  | very low density lipoprotein receptor                                  | -2.2 |      | -1.4 | -1.4 |      |      |      | -4.7   | -4.7   | -1.2 | -1.2 | 2.6   | 2.6   |
| VPS11  | vacuolar protein sorting 11 homolog (S. cerevisiae)                    |      |      | 1.2  |      |      | 1.2  |      | 1.6    | 1.6    | -1.2 |      |       |       |
| VPS13A | vacuolar protein sorting 13 homolog A (S. cerevisiae)                  |      |      | -1.9 |      |      | -1.3 | -1.3 | 3.7    | 3.7    | -1.4 |      | -2.8  | -2.8  |
| VPS26  | vacuolar protein sorting 26 homolog A (yeast)                          | 1.3  |      |      |      |      | 1.2  |      | 1.5    | 1.5    | 1.3  | 1.3  |       |       |
| VPS45A | vacuolar protein sorting 45 homolog (S. cerevisiae)                    | 1.2  |      |      |      |      |      |      | 1.4    |        |      |      | -1.3  |       |
| VPS4B  | vacuolar protein sorting 4 homolog B (S. cerevisiae)                   |      |      |      |      |      | -1.4 |      |        |        |      |      | 1.3   | 1.3   |
| VPS52  | vacuolar protein sorting 52 homolog (S. cerevisiae)                    |      |      |      |      |      |      |      |        |        |      |      | 1.3   | 1.3   |
| VRK1   | vaccinia related kinase 1                                              |      |      |      |      | -1.2 | -1.2 |      |        |        |      |      | -1.7  | -1.7  |



|          |                                                     |      |      |      |      |      |      |      |       |       |      |      |      |      |
|----------|-----------------------------------------------------|------|------|------|------|------|------|------|-------|-------|------|------|------|------|
| ZBTB11   | zinc finger and BTB domain containing 11            |      |      |      |      |      |      |      |       |       | -1.3 | -1.3 | -1.6 | -1.6 |
| ZBTB16   | zinc finger and BTB domain containing 16            |      |      |      |      | 7.0  |      |      | 5.9   | 5.9   | 2.8  | 2.8  | 8.3  | 8.3  |
| ZBTB17   | zinc finger and BTB domain containing 17            |      |      |      |      |      |      |      |       |       |      |      | 1.3  |      |
| ZBTB33   | zinc finger and BTB domain containing 33            |      |      | 2.0  |      |      |      |      |       |       |      |      |      |      |
| ZBTB5    | zinc finger and BTB domain containing 5             | -1.2 |      |      |      |      |      |      |       |       |      |      | -1.4 | -1.4 |
| ZC3H13   | zinc finger CCCH-type containing 13                 |      |      |      |      |      |      |      |       |       |      |      |      |      |
| ZC3HAV1  | zinc finger CCCH-type, antiviral 1                  |      |      |      |      |      |      |      | -1.7  | -1.7  | 1.4  | 1.4  | 2.6  | 2.6  |
| ZDHHHC17 | zinc finger, DHHC-type containing 17                |      |      |      |      |      |      |      |       |       | 1.3  |      | 1.2  | 1.2  |
| ZFP161   | zinc finger protein 161 homolog (mouse)             |      |      |      |      |      |      |      |       |       |      |      |      |      |
| ZFP36    | zinc finger protein 36, C3H type, homolog (mouse)   |      |      | 1.7  | 1.7  | 1.5  |      |      | -1.3  |       | 3.2  | 3.2  | 4.1  | 4.1  |
| ZFP36L1  | zinc finger protein 36, C3H type-like 1             |      |      | -1.4 |      |      |      |      | -24.5 | -24.5 |      |      | 11.5 | 11.5 |
| ZFP36L2  | zinc finger protein 36, C3H type-like 2             | 3.0  | 3.0  | 2.5  | 2.5  | 2.5  | 2.5  | 2.2  | 2.2   | 1.8   | 1.8  |      |      |      |
| ZFX      | zinc finger protein, X-linked                       | 1.8  |      | 1.3  |      | 1.3  |      |      | -1.6  | -1.6  | 1.4  |      | 2.8  | 1.7  |
| ZFYVE16  | zinc finger, FYVE domain containing 16              |      |      |      |      |      |      |      | 1.6   |       | 1.6  | 1.6  | 2.7  | 2.7  |
| ZHX2     | zinc fingers and homeoboxes 2                       | 2.6  |      | 2.4  | 2.4  |      |      |      | -5.1  | -5.1  | 1.8  | 1.3  | 6.9  | 6.9  |
| ZHX3     | zinc fingers and homeoboxes 3                       | 1.3  |      | 1.4  | 1.4  | 1.3  |      |      | 2.0   | 2.0   | 2.0  | 2.0  | 1.4  |      |
| ZMPSTE24 | zinc metalloproteinase (STE24 homolog, yeast)       |      |      | -1.4 |      |      |      |      | 1.4   | 1.4   |      |      | -1.8 | -1.8 |
| ZMYM3    | zinc finger, MYM-type 3                             |      |      |      |      |      |      |      | 1.6   |       | -1.3 |      | -1.8 | -1.8 |
| ZMYND11  | zinc finger, MYND domain containing 11              | -1.4 |      | 1.5  |      |      |      |      | 2.6   | 2.6   | 1.5  | 1.3  |      |      |
| ZNF124   | zinc finger protein 124                             |      |      |      |      |      |      |      | 1.3   |       | -1.4 | -1.4 | -1.7 | -1.7 |
| ZNF133   | zinc finger protein 133                             |      |      |      |      |      | 1.2  |      |       |       |      |      | 1.3  |      |
| ZNF143   | zinc finger protein 143                             |      |      |      |      |      | -1.3 |      | -1.4  | -1.4  |      |      |      |      |
| ZNF148   | zinc finger protein 148                             | 1.3  | 1.3  | 1.2  |      |      | -1.7 |      | 1.8   | 1.8   | 1.8  | 1.8  | -1.6 | -1.6 |
| ZNF160   | zinc finger protein 160                             |      |      |      |      |      |      |      | -1.7  | -1.7  | 1.6  | 1.5  | 1.6  | 1.6  |
| ZNF161   | vascular endothelial zinc finger 1                  | 1.3  |      | 1.2  |      |      |      |      | -1.9  | -1.9  | 1.4  |      | 2.2  | 2.2  |
| ZNF175   | zinc finger protein 175                             | 1.2  |      |      |      |      |      |      | 2.9   | 2.9   |      |      | -2.6 | -2.6 |
| ZNF183   | --                                                  |      |      | 1.2  |      |      | -1.3 |      | 1.4   | 1.4   | -2.0 |      | -1.5 | -1.5 |
| ZNF198   | zinc finger, MYM-type 2                             |      |      |      |      |      |      |      | 4.3   | 4.3   | 1.3  | -1.3 | -2.5 | -2.5 |
| ZNF202   | zinc finger protein 202                             | 1.2  |      | -2.1 |      |      |      |      | -1.4  | -1.4  | -1.8 | -1.8 |      |      |
| ZNF207   | zinc finger protein 207                             |      |      |      |      |      |      |      | 2.4   | 2.4   | -1.4 | -1.4 |      |      |
| ZNF212   | zinc finger protein 212                             |      |      |      |      |      |      |      | -1.2  |       | 1.3  |      |      |      |
| ZNF217   | zinc finger protein 217                             |      |      |      |      |      |      |      |       |       |      |      | 1.3  | 1.3  |
| ZNF22    | zinc finger protein 22 (KOX 15)                     | -1.3 |      |      |      |      | -1.4 |      | -1.3  | -1.3  |      |      | 1.3  | 1.3  |
| ZNF238   | zinc finger protein 238                             | -1.4 |      | 2.1  |      |      | -1.3 |      | -5.5  | -5.5  |      |      | 6.3  | 6.3  |
| ZNF24    | zinc finger protein 24                              | -1.3 |      | 1.5  |      |      |      |      |       |       | -1.5 | -1.2 | 1.3  |      |
| ZNF259   | zinc finger protein 259                             | -1.4 | -1.4 | -1.5 |      |      | -1.8 | -1.8 | -1.2  | -1.2  | -1.3 |      | -1.6 | -1.6 |
| ZNF263   | zinc finger protein 263                             | -1.2 |      | -1.3 |      |      | -1.6 |      | -1.7  | -1.7  | -1.7 | -1.7 | 1.8  | 1.8  |
| ZNF267   | zinc finger protein 267                             |      |      | 1.3  |      |      |      |      | 1.9   | 1.9   |      |      | -1.9 | -1.9 |
| ZNF268   | zinc finger protein 268                             |      |      |      |      |      |      |      | -1.2  |       | -1.4 |      | -1.8 | -1.8 |
| ZNF274   | zinc finger protein 274                             | -1.6 |      |      |      |      |      |      | 1.8   |       |      |      | -1.5 | -1.5 |
| ZNF278   | POZ (BTB) and AT hook containing zinc finger 1      | 1.8  | 1.5  | 1.7  | 1.7  | 1.3  |      |      | 1.4   |       | -1.4 | -1.4 | 1.3  |      |
| ZNF291   | zinc finger protein 291                             |      |      |      |      |      |      |      | 1.4   | 1.4   | 1.6  | 1.6  | 2.1  | 2.1  |
| ZNF318   | zinc finger protein 318                             |      |      | 1.3  | 1.3  |      |      |      | 2.3   | 2.3   | 1.3  | 1.3  |      |      |
| ZNF330   | zinc finger protein 330                             |      |      | -1.5 |      |      | -1.6 | -1.6 |       |       |      |      | -1.8 | -1.8 |
| ZNF354A  | zinc finger protein 354A                            |      |      |      |      |      |      |      | 2.6   | 2.6   | 1.2  |      | -1.5 |      |
| ZNF364   | zinc finger protein 364                             | 1.2  |      |      |      | 1.2  |      |      | 1.3   | 1.3   | 1.8  | 1.8  | 3.0  | 3.0  |
| ZNF384   | zinc finger protein 384                             |      |      | 1.2  |      |      |      |      | -1.6  | -1.6  | -1.6 | -1.6 | 1.4  |      |
| ZNF410   | zinc finger protein 410                             | 1.2  | 1.2  |      |      |      |      |      |       |       | 1.3  |      |      |      |
| ZNF42    | myeloid zinc finger 1                               |      |      |      |      | 1.2  |      |      |       |       | -1.4 | -1.4 | -1.2 |      |
| ZNF423   | zinc finger protein 423                             |      |      |      |      |      | -2.4 |      | -3.6  | -3.6  | -2.2 | -2.2 | 5.6  | 5.6  |
| ZNF43    | zinc finger protein 43                              |      |      |      |      |      |      |      | -1.4  |       |      |      | 1.6  |      |
| ZNF45    | zinc finger protein 45                              | 1.2  |      | 1.4  |      |      |      |      |       |       |      |      |      |      |
| ZNF451   | zinc finger protein 451                             |      |      |      |      |      |      |      | 2.5   | 2.5   |      |      | -1.6 | -1.6 |
| ZNF592   | zinc finger protein 592                             |      |      |      |      | 1.2  |      |      | -1.7  | -1.7  | -1.3 | 1.3  | 1.5  | 1.4  |
| ZNF638   | zinc finger protein 638                             | 1.3  |      |      |      |      |      |      | -1.3  |       | 1.3  |      | 1.4  |      |
| ZNF84    | zinc finger protein 84                              |      |      |      |      |      |      |      | -1.2  |       |      |      | -1.4 | -1.4 |
| ZNF9     | CCHC-type zinc finger, nucleic acid binding protein | -1.5 |      | -1.9 | -1.9 | -1.6 |      |      |       |       | -1.4 | -1.4 | -1.5 | -1.5 |
| ZNF91    | zinc finger protein 91                              | 1.3  |      | 1.4  | 1.4  |      |      |      | -2.2  | -2.2  | 1.2  |      | 2.2  | 2.2  |

|         |                                                                       |      |     |      |      |      |      |     |      |      |      |      |      |
|---------|-----------------------------------------------------------------------|------|-----|------|------|------|------|-----|------|------|------|------|------|
| ZNF96   | zinc finger protein 96                                                |      |     |      |      |      | 1.2  |     |      |      |      | -1.9 | -1.9 |
| ZNFN1A1 | IKAROS family zinc finger 1 (Ikaros)                                  |      | 2.0 | 2.0  |      |      | 2.2  | 2.2 | 1.6  | 1.3  |      | 2.2  | 2.2  |
| ZNHIT3  | zinc finger, HIT type 3                                               |      |     |      | -1.4 |      |      |     |      |      |      |      |      |
| ZRF1    | zuotin related factor 1                                               | -1.6 |     | -1.2 |      | -1.6 |      | 1.4 | 1.4  | -2.3 | -1.5 | -2.9 | -2.9 |
| ZRSR2   | zinc finger (CCCH type), RNA-binding motif and serine/arginine rich 2 |      |     |      |      |      | -1.3 |     |      |      |      | 1.8  | 1.8  |
| ZUBR1   | zinc finger, UBR1 type 1                                              |      |     |      |      |      | 2.0  | 2.0 |      |      |      | -1.9 | -1.9 |
| ZW10    | ZW10, kinetochore associated, homolog (Drosophila)                    | 1.4  |     |      |      |      |      |     | -1.4 | -1.4 |      | -1.3 |      |
| ZWINT   | ZW10 interactor                                                       |      |     |      |      |      |      |     | -1.3 | -1.3 |      | -2.3 | -2.3 |
| ZWINTAS | ZW10 interactor antisense                                             | 1.2  |     |      |      | 1.5  |      |     |      |      |      |      |      |
