# Supplementary material for: Gene expression profiling of leukemic cells and primary thymocytes predicts a signature for apoptotic sensitivity to glucocorticoids
Source: Springer Nature journal article supplement (doi:10.1186/1475-2867-7-18), 2007-11-28
Supplement: Additional file 5 [file 1475-2867-7-18-s5.pdf]

| <b>Additional file 5: Adult B-ALL vs. Pediatric B-ALL, T-ALL, and AML.</b> |                                                                         |                   |                   |                   |                   |                   |
|----------------------------------------------------------------------------|-------------------------------------------------------------------------|-------------------|-------------------|-------------------|-------------------|-------------------|
| <b>Blank = "absent"</b>                                                    |                                                                         |                   |                   |                   |                   |                   |
| <b>GC-response</b>                                                         |                                                                         | <b>Sensitive</b>  | <b>Sensitive</b>  | <b>Sensitive</b>  | <b>Sensitive</b>  | <b>Sensitive</b>  |
| <b>Patient-derived cell line</b>                                           |                                                                         | <b>Adult</b>      | <b>Pediatric</b>  | <b>Pediatric</b>  | <b>Pediatric</b>  | <b>Pediatric</b>  |
| <b>Cell lineage</b>                                                        |                                                                         | <b>B-cell</b>     | <b>B-cell</b>     | <b>T-cell</b>     | <b>T-cell</b>     | <b>Myeloid</b>    |
| <b>Sub-type of leukemia</b>                                                |                                                                         | <b>ALL</b>        | <b>ALL</b>        | <b>ALL</b>        | <b>ALL</b>        | <b>AML</b>        |
| <b>Name</b>                                                                | <b>Description</b>                                                      | <b>RS4 Dx</b>     | <b>SUP Dx</b>     | <b>C7-14 Dx</b>   | <b>C1-6 Dx</b>    | <b>Kas Dx</b>     |
|                                                                            |                                                                         | <b>Stat. sign</b> |
| 76P                                                                        | gamma tubulin ring complex protein (76p gene)                           | -1.9              | -1.6              |                   |                   | 1.6               |
| AARS                                                                       | alanyl-tRNA synthetase                                                  | -2.0              | -1.9              | -1.3              |                   | -1.5              |
| AASDHPPT                                                                   | aminoadipate-semialdehyde dehydrogenase-phosphopantetheinyl transferase | -1.4              | -1.3              |                   |                   |                   |
| AATF                                                                       | apoptosis antagonizing transcription factor                             | -1.3              |                   |                   | -1.4              |                   |
| ABAT                                                                       | 4-aminobutyrate aminotransferase                                        | -21.9             |                   |                   |                   | 14.5              |
| ABCB6                                                                      | ATP-binding cassette, sub-family B (MDR/TAP), member 6                  | -1.6              |                   | 1.3               |                   | 3.4               |
| ABCB7                                                                      | ATP-binding cassette, sub-family B (MDR/TAP), member 7                  | 1.3               |                   |                   |                   |                   |
| ABCC1                                                                      | ATP-binding cassette, sub-family C (CFTR/MRP), member 1                 | 1.9               | -2.0              |                   | 1.5               | -3.3              |
| ABCC5                                                                      | ATP-binding cassette, sub-family C (CFTR/MRP), member 5                 | -1.4              | -1.8              | 2.1               |                   |                   |
| ABCE1                                                                      | ATP-binding cassette, sub-family E (OABP), member 1                     | 1.4               | -2.0              | -1.5              |                   | -4.2              |
| ABI1                                                                       | abl-interactor 1                                                        | 1.4               | 1.7               |                   |                   | 2.8               |
| ABI2                                                                       | abl-interactor 2                                                        | 1.3               | -1.9              |                   |                   | -2.7              |
| ABLIM1                                                                     | actin binding LIM protein 1                                             | -5.8              | -3.1              |                   |                   |                   |
| ACADM                                                                      | acyl-Coenzyme A dehydrogenase, C-4 to C-12 straight chain               | -1.8              |                   |                   |                   | 1.7               |
| ACAT2                                                                      | acetyl-Coenzyme A acetyltransferase 2 (acetoacetyl Coenzyme A thiolase) | -2.4              | -1.5              |                   |                   |                   |
| ACBD3                                                                      | acyl-Coenzyme A binding domain containing 3                             | -2.0              | 1.4               |                   |                   | 1.5               |
| ACD                                                                        | adrenocortical dysplasia homolog (mouse)                                | -1.3              |                   |                   |                   |                   |
| ACLY                                                                       | ATP citrate lyase                                                       | -1.4              | -1.7              |                   |                   | -1.3              |
| ACO1                                                                       | aconitase 1, soluble                                                    | 1.4               |                   | 1.3               | 1.4               | -1.2              |
| ACOT2                                                                      | acyl-CoA thioesterase 2                                                 | 5.0               |                   |                   |                   | -7.8              |
| ACOT7                                                                      | acyl-CoA thioesterase 7                                                 | -1.6              | -1.4              |                   |                   | -1.3              |
| ACOX1                                                                      | acyl-Coenzyme A oxidase 1, palmitoyl                                    | 5.2               |                   |                   |                   | -3.5              |
| ACP1                                                                       | acid phosphatase 1, soluble                                             | -2.1              |                   |                   |                   | -1.8              |
| ACSL3                                                                      | acyl-CoA synthetase long-chain family member 3                          | -1.8              | -1.3              |                   |                   | 2.2               |
| ACSL4                                                                      | acyl-CoA synthetase long-chain family member 4                          | -1.7              |                   |                   |                   |                   |
| ACTB                                                                       | actin, beta                                                             | -1.5              |                   |                   |                   | 1.6               |
| ACTL6A                                                                     | actin-like 6A                                                           | -1.5              | -1.3              |                   |                   | -1.6              |
| ACTN1                                                                      | actinin, alpha 1                                                        | 5.4               | -1.2              |                   |                   | -3.5              |
| ACTR2                                                                      | ARP2 actin-related protein 2 homolog (yeast)                            | -1.4              | 1.3               | 1.2               |                   | 1.6               |
| ACTR3                                                                      | ARP3 actin-related protein 3 homolog (yeast)                            | 2.0               |                   |                   |                   | -1.6              |
| ACVR1B                                                                     | activin A receptor, type IB                                             | 1.7               |                   |                   |                   | -1.5              |
| ACY1                                                                       | aminoacylase 1                                                          | 1.7               |                   |                   |                   | -4.3              |
| ADA                                                                        | adenosine deaminase                                                     | -9.1              | 1.3               | -1.3              | -1.5              | 3.4               |
| ADAM10                                                                     | ADAM metallopeptidase domain 10                                         | -3.0              | 2.1               |                   |                   | 2.8               |

|         |                                                                                                                      |       |      |      |      |       |
|---------|----------------------------------------------------------------------------------------------------------------------|-------|------|------|------|-------|
| ADAM17  | ADAM metalloproteinase domain 17 (tumor necrosis factor, alpha, converting enzyme)                                   | -1.7  | 1.5  |      |      | 1.8   |
| ADAM9   | ADAM metalloproteinase domain 9 (meltrin gamma)                                                                      | 2.4   | 1.6  |      |      | 2.1   |
| ADARB1  | adenosine deaminase, RNA-specific, B1 (RED1 homolog rat)                                                             | -34.5 |      |      |      | 1.7   |
| ADCY7   | adenylate cyclase 7                                                                                                  | -3.1  | -1.5 |      |      | 3.7   |
| ADD1    | adducin 1 (alpha)                                                                                                    | 1.2   | 1.8  |      |      | 2.0   |
| ADFP    | adipose differentiation-related protein                                                                              | 3.3   | 1.5  |      |      | -2.0  |
| ADH5    | alcohol dehydrogenase 5 (class III), chi polypeptide                                                                 | 2.4   |      |      |      | -2.1  |
| ADIPOR2 | adiponectin receptor 2                                                                                               | -1.5  | 1.9  |      |      |       |
| ADK     | adenosine kinase                                                                                                     | 1.6   | -2.0 |      |      | -4.1  |
| ADNP    | activity-dependent neuroprotector                                                                                    | -1.4  | -1.2 |      |      | 1.5   |
| ADRBK1  | adrenergic, beta, receptor kinase 1                                                                                  | -2.0  |      |      |      | -1.3  |
| ADRBK2  | adrenergic, beta, receptor kinase 2                                                                                  | 1.6   | -1.5 |      |      | -2.2  |
| ADRM1   | adhesion regulating molecule 1                                                                                       | 2.2   |      |      |      | -3.5  |
| ADSL    | adenylosuccinate lyase                                                                                               | 1.5   | -1.5 |      |      | -2.4  |
| AEBP1   | AE binding protein 1                                                                                                 | -1.6  | 1.5  |      |      | 2.1   |
| AES     | amino-terminal enhancer of split                                                                                     | -2.1  |      | 1.2  |      | 3.0   |
| AFF1    | AF4/FMR2 family, member 1                                                                                            | -3.5  | 2.8  |      |      | 8.6   |
| AFG3L2  | AFG3 ATPase family gene 3-like 2 (yeast)                                                                             | 1.3   |      | -1.3 |      | -2.0  |
| AGA     | aspartylglucosaminidase                                                                                              | -1.3  |      |      |      | -1.7  |
| AGGF1   | angiogenic factor with G patch and FHA domains 1                                                                     | 1.8   |      |      |      | -1.8  |
| AGL     | amylase-1, 6-glucohydrolase, 4-alpha-glucohydrolase (glycogen debranching enzyme, glycogen storage disease type III) | -2.0  |      |      |      | 3.3   |
| AGPAT1  | 1-acylglycerol-3-phosphate O-acyltransferase 1 (lysophosphatidic acid acyltransferase, alpha)                        | 1.8   | -1.4 | 1.4  |      | 1.3   |
| AGPAT2  | 1-acylglycerol-3-phosphate O-acyltransferase 2 (lysophosphatidic acid acyltransferase, beta)                         | 1.5   |      |      |      | -1.4  |
| AGPS    | alkylglycerone phosphate synthase                                                                                    | 5.5   | 5.0  |      |      | -2.6  |
| AGRN    | agrin                                                                                                                | -1.6  | -2.8 |      |      |       |
| AHCY    | S-adenosylhomocysteine hydrolase                                                                                     | 1.4   | -1.4 |      |      | -2.7  |
| AHCYL1  | S-adenosylhomocysteine hydrolase-like 1                                                                              | 1.6   | -1.4 |      |      | -1.6  |
| AIF1    | allograft inflammatory factor 1                                                                                      | 2.5   |      |      |      | -39.1 |
| AIP     | aryl hydrocarbon receptor interacting protein                                                                        | -1.4  |      |      |      |       |
| AK2     | adenylate kinase 2                                                                                                   | -1.4  | -2.2 |      | -1.6 | -3.3  |
| AKAP1   | A kinase (PRKA) anchor protein 1                                                                                     | -1.8  | -2.4 | -1.6 |      | -2.2  |
| AKAP10  | A kinase (PRKA) anchor protein 10                                                                                    | -2.7  |      |      |      | 2.9   |
| AKAP11  | A kinase (PRKA) anchor protein 11                                                                                    | -1.2  | -1.3 |      |      | -1.5  |
| AKR1A1  | aldo-keto reductase family 1, member A1 (aldehyde reductase)                                                         | -2.6  | -2.3 |      |      |       |
| AKR1B1  | aldo-keto reductase family 1, member B1 (aldose reductase)                                                           | -4.2  | -1.2 |      |      | 8.1   |
| AKR7A2  | aldo-keto reductase family 7, member A2 (aflatoxin aldehyde reductase)                                               | -1.6  |      |      |      | -1.3  |
| AKT1    | v-akt murine thymoma viral oncogene homolog 1                                                                        | -1.5  |      |      |      | 1.3   |
| ALAS1   | aminolevulinic acid, delta-, synthase 1                                                                              | 2.4   |      |      |      | -1.9  |
| ALDH4A1 | aldehyde dehydrogenase 4 family, member A1                                                                           | 1.9   |      | 1.6  |      | -3.5  |
| ALDH5A1 | aldehyde dehydrogenase 5 family, member A1 (succinate-semialdehyde dehydrogenase)                                    | -1.5  | -1.4 |      |      | -2.2  |
| ALDH6A1 | aldehyde dehydrogenase 6 family, member A1                                                                           | 1.6   | -1.7 |      | 1.6  |       |
| ALDOA   | aldolase A, fructose-bisphosphate                                                                                    | -1.5  | -1.3 |      |      | -1.3  |

|          |                                                                                      |       |      |      |      |       |
|----------|--------------------------------------------------------------------------------------|-------|------|------|------|-------|
| ALS2CR3  | trafficking protein, kinesin binding 2                                               | 1.7   | 2.4  |      |      | 2.8   |
| AMD1     | adenosylmethionine decarboxylase 1                                                   | 1.4   |      | -1.4 |      | -2.4  |
| AMPD2    | adenosine monophosphate deaminase 2 (isoform L)                                      | 1.9   | -2.5 |      |      | -2.9  |
| ANAPC10  | anaphase promoting complex subunit 10                                                | 1.8   |      |      |      | -1.3  |
| ANAPC13  | anaphase promoting complex subunit 13                                                | 1.2   | -1.3 |      |      | -1.7  |
| ANAPC5   | anaphase promoting complex subunit 5                                                 | 1.5   | -1.8 |      |      | -2.3  |
| ANGPT1   | angiopoietin 1                                                                       | 1.8   |      |      |      | -8.8  |
| ANKRD28  | ankyrin repeat domain 28                                                             | 2.2   | 2.2  |      | -2.0 | -4.1  |
| ANKRD40  | ankyrin repeat domain 40                                                             | -1.5  |      |      |      | 1.4   |
| ANP32A   | acidic (leucine-rich) nuclear phosphoprotein 32 family, member A                     | 2.1   | -1.3 |      |      | -1.8  |
| ANXA11   | annexin A11                                                                          | 1.8   | 1.8  |      |      | -1.2  |
| ANXA6    | annexin A6                                                                           | 2.4   |      |      | 1.3  | -1.3  |
| ANXA7    | annexin A7                                                                           | 1.6   |      |      |      | -1.3  |
| AP1B1    | adaptor-related protein complex 1, beta 1 subunit                                    | -1.4  |      |      |      | 2.2   |
| AP1S2    | adaptor-related protein complex 1, sigma 2 subunit                                   | -27.2 | 1.6  | 1.8  |      | 21.8  |
| AP3D1    | adaptor-related protein complex 3, delta 1 subunit                                   | 1.5   | 1.3  |      |      |       |
| AP3S1    | adaptor-related protein complex 3, sigma 1 subunit                                   | 1.4   | 2.4  | 1.6  | 1.9  | 2.1   |
| AP3S2    | adaptor-related protein complex 3, sigma 2 subunit                                   | 2.2   |      |      |      | -1.8  |
| APG12L   | ATG12 autophagy related 12 homolog (S. cerevisiae)                                   | 1.3   | 1.9  | 1.6  | 1.9  | 2.5   |
| API5     | apoptosis inhibitor 5                                                                | 1.6   | -2.1 |      |      | -2.0  |
| APLP2    | amyloid beta (A4) precursor-like protein 2                                           | 4.2   | -1.7 |      |      | -12.0 |
| APOBEC3B | apolipoprotein B mRNA editing enzyme, catalytic polypeptide-like 3B                  | -1.9  |      |      |      | 2.0   |
| APPBP1   | amyloid beta precursor protein binding protein 1                                     | -1.2  | -1.3 |      |      | -1.2  |
| APPBP2   | amyloid beta precursor protein (cytoplasmic tail) binding protein 2                  | 2.0   | 1.4  |      |      | -1.3  |
| ARF1     | ADP-ribosylation factor 1                                                            | 1.3   | -1.2 |      |      | -1.2  |
| ARF3     | ADP-ribosylation factor 3                                                            | 1.4   | -1.3 | 1.3  |      | -1.3  |
| ARF4     | ADP-ribosylation factor 4                                                            | 1.3   |      |      |      | -1.6  |
| ARF5     | ADP-ribosylation factor 5                                                            | -2.4  |      |      |      | 2.0   |
| ARF6     | ADP-ribosylation factor 6                                                            | 1.4   | 1.7  |      |      | 1.7   |
| ARFGEF1  | ADP-ribosylation factor guanine nucleotide-exchange factor 1 (brefeldin A-inhibited) | -1.6  | 1.5  |      |      | 1.8   |
| ARFGEF2  | ADP-ribosylation factor guanine nucleotide-exchange factor 2 (brefeldin A-inhibited) | 1.3   |      |      |      | -1.2  |
| ARHGAP12 | Rho GTPase activating protein 12                                                     | 1.7   |      |      | -1.3 |       |
| ARHGAP5  | Rho GTPase activating protein 5                                                      | -1.4  |      |      |      | 2.3   |
| ARHGDI A | Rho GDP dissociation inhibitor (GDI) alpha                                           | -1.3  |      |      |      |       |
| ARHGDI B | Rho GDP dissociation inhibitor (GDI) beta                                            | -1.4  |      |      |      | 1.5   |
| ARHGEF18 | rho/rac guanine nucleotide exchange factor (GEF) 18                                  | 1.5   | 2.5  | 1.3  |      | 3.3   |
| ARHGEF2  | rho/rac guanine nucleotide exchange factor (GEF) 2                                   | 1.3   | 1.3  |      |      | -1.7  |
| ARHGEF6  | Rac/Cdc42 guanine nucleotide exchange factor (GEF) 6                                 | -1.4  | -1.3 | 1.3  |      |       |
| ARHGEF7  | Rho guanine nucleotide exchange factor (GEF) 7                                       | -1.8  | 3.6  |      |      | 5.1   |
| ARID4A   | AT rich interactive domain 4A (RBP1-like)                                            | 2.9   |      |      |      |       |
| ARID5B   | AT rich interactive domain 5B (MRF1-like)                                            | -34.1 | -2.2 |      |      | 8.6   |
| ARIH1    | ariadne homolog, ubiquitin-conjugating enzyme E2 binding protein, 1 (Drosophila)     | 1.7   | 1.6  |      |      | 1.8   |

|          |                                                                                          |       |      |      |      |       |
|----------|------------------------------------------------------------------------------------------|-------|------|------|------|-------|
| ARIH2    | ariadne homolog 2 (Drosophila)                                                           | -1.5  | 1.6  |      |      | -2.4  |
| ARL1     | ADP-ribosylation factor-like 1                                                           | 1.3   |      | -1.2 |      | -1.5  |
| ARL4A    | ADP-ribosylation factor-like 4A                                                          | 26.8  |      |      |      | -33.8 |
| ARL6IP   | ADP-ribosylation factor-like 6 interacting protein 1                                     | -2.2  | 1.7  |      |      | 2.7   |
| ARPC1A   | actin related protein 2/3 complex, subunit 1A, 41kDa                                     | -2.8  |      |      |      | 2.2   |
| ARPC1B   | actin related protein 2/3 complex, subunit 1B, 41kDa                                     | 1.3   |      |      | -1.3 |       |
| ARPC2    | actin related protein 2/3 complex, subunit 2, 34kDa                                      | -1.3  |      |      |      | 1.4   |
| ARPC4    | actin related protein 2/3 complex, subunit 4, 20kDa                                      | -4.7  |      |      |      | 4.1   |
| ARPC5    | actin related protein 2/3 complex, subunit 5, 16kDa                                      | -1.4  | 1.4  |      |      | 2.3   |
| ARPP-19  | cyclic AMP phosphoprotein, 19 kD                                                         | -2.5  |      |      |      | 2.4   |
| ARRB2    | arrestin, beta 2                                                                         | -2.1  |      |      |      | 1.3   |
| ASAH1    | N-acylsphingosine amidohydrolase (acid ceramidase) 1                                     | 4.4   | -1.3 |      |      | -3.8  |
| ASB1     | ankyrin repeat and SOCS box-containing 1                                                 | -1.8  |      |      |      | 1.4   |
| ASCC3L1  | activating signal cointegrator 1 complex subunit 3-like 1                                | -1.5  | -1.4 |      |      |       |
| ASK      | DBF4 homolog (S. cerevisiae)                                                             | -1.7  | 1.5  |      |      |       |
| ASMTL    | acetylserotonin O-methyltransferase-like                                                 | -2.7  |      |      |      | 3.2   |
| ASNS     | asparagine synthetase                                                                    | 2.9   |      |      |      | -9.0  |
| ASS      | argininosuccinate synthetase 1                                                           | -1.4  | -3.8 |      |      | -2.0  |
| ASXL1    | additional sex combs like 1 (Drosophila)                                                 | -1.6  | -1.4 |      |      | -2.2  |
| ATF2     | activating transcription factor 2                                                        | 1.6   | 1.5  |      |      | -1.5  |
| ATF4     | activating transcription factor 4 (tax-responsive enhancer element B67)                  | -1.3  | -1.4 | -1.5 |      |       |
| ATF5     | activating transcription factor 5                                                        | -1.6  | -2.0 |      |      |       |
| ATIC     | 5-aminoimidazole-4-carboxamide ribonucleotide formyltransferase/IMP cyclohydrolase       | -2.1  | -3.2 | -1.4 | -2.0 | -1.3  |
| ATOX1    | ATX1 antioxidant protein 1 homolog (yeast)                                               | 5.6   |      |      |      | -13.3 |
| ATP11B   | ATPase, Class VI, type 11B                                                               | -1.6  | 5.1  |      | 1.5  | 4.7   |
| ATP1A1   | ATPase, Na+/K+ transporting, alpha 1 polypeptide                                         | 1.3   | -1.6 |      |      | -2.4  |
| ATP1A3   | ATPase, Na+/K+ transporting, alpha 3 polypeptide                                         | -13.1 |      |      |      |       |
| ATP2A2   | ATPase, Ca++ transporting, cardiac muscle, slow twitch 2                                 | 1.3   | -1.5 |      |      | -2.5  |
| ATP2A3   | ATPase, Ca++ transporting, ubiquitous                                                    | 2.5   | 1.2  |      |      | -2.0  |
| ATP2B1   | ATPase, Ca++ transporting, plasma membrane 1                                             | -2.1  | -2.1 |      |      |       |
| ATP2B4   | ATPase, Ca++ transporting, plasma membrane 4                                             | -3.8  | 2.8  |      |      | 3.9   |
| ATP2C1   | ATPase, Ca++ transporting, type 2C, member 1                                             | 1.9   |      |      |      | 1.5   |
| ATP5A1   | ATP synthase, H+ transporting, mitochondrial F1 complex, alpha subunit 1, cardiac muscle | 1.3   |      |      |      | -1.5  |
| ATP5C1   | ATP synthase, H+ transporting, mitochondrial F1 complex, gamma polypeptide 1             | 1.4   |      |      |      | -1.5  |
| ATP5G3   | ATP synthase, H+ transporting, mitochondrial F0 complex, subunit C3 (subunit 9)          | 2.3   |      |      |      | -3.8  |
| ATP5H    | ATP synthase, H+ transporting, mitochondrial F0 complex, subunit d                       | 1.5   | -1.2 |      |      | -2.4  |
| ATP5J    | ATP synthase, H+ transporting, mitochondrial F0 complex, subunit F6                      | -1.8  |      |      |      | 3.0   |
| ATP5J2   | ATP synthase, H+ transporting, mitochondrial F0 complex, subunit F2                      | -1.3  |      |      |      |       |
| ATP5L    | ATP synthase, H+ transporting, mitochondrial F0 complex, subunit G                       | 1.7   | 1.6  |      |      | -1.6  |
| ATP6AP2  | ATPase, H+ transporting, lysosomal accessory protein 2                                   | 2.2   | 1.2  |      |      | -1.8  |
| ATP6V0C  | ATPase, H+ transporting, lysosomal 16kDa, V0 subunit c                                   | -1.4  | 1.3  |      |      | 1.9   |
| ATP6V0D1 | ATPase, H+ transporting, lysosomal 38kDa, V0 subunit d1                                  | 1.4   |      | 1.3  |      | -1.3  |

|               |                                                                                               |       |      |      |      |      |
|---------------|-----------------------------------------------------------------------------------------------|-------|------|------|------|------|
| ATP6V0E       | ATPase, H+ transporting, lysosomal 9kDa, V0 subunit e1                                        | 1.3   |      |      |      | -1.4 |
| ATP6V1A       | ATPase, H+ transporting, lysosomal 70kDa, V1 subunit A                                        | 1.9   |      | 1.5  |      | -1.9 |
| ATP6V1B2      | ATPase, H+ transporting, lysosomal 56/58kDa, V1 subunit B2                                    | 1.5   |      |      |      |      |
| ATP6V1C1      | ATPase, H+ transporting, lysosomal 42kDa, V1 subunit C1                                       | -2.1  |      | -1.4 |      | 2.1  |
| ATP6V1D       | ATPase, H+ transporting, lysosomal 34kDa, V1 subunit D                                        | -1.3  | 1.3  |      |      | 1.9  |
| ATP9B         | ATPase, Class II, type 9B                                                                     | -1.7  |      |      |      |      |
| ATRX          | alpha thalassemia/mental retardation syndrome X-linked (RAD54 homolog, <i>S. cerevisiae</i> ) | 1.4   |      |      |      | 1.7  |
| ATXN2L        | ataxin 2-like                                                                                 | -2.2  |      |      |      | 1.8  |
| AURKB         | aurora kinase B                                                                               | -3.3  | 1.4  |      |      | 3.0  |
| B2M           | beta-2-microglobulin                                                                          | -1.6  |      |      |      | 3.1  |
| B3GNT1        | UDP-GlcNAc:betaGal beta-1,3-N-acetylglucosaminyltransferase 1                                 | -2.7  |      |      |      |      |
| B4GALT6       | UDP-Gal:betaGlcNAc beta 1,4- galactosyltransferase, polypeptide 6                             | 2.5   |      |      |      | -6.7 |
| B930013M22RIK | ras responsive element binding protein 1                                                      | 3.1   | 2.1  |      |      | 1.5  |
| BACH1         | BTB and CNC homology 1, basic leucine zipper transcription factor 1                           | 1.2   | 1.3  |      |      | 1.2  |
| BAG2          | BCL2-associated athanogene 2                                                                  | -1.2  | -1.8 |      |      | -1.5 |
| BAMBI         | BMP and activin membrane-bound inhibitor homolog ( <i>Xenopus laevis</i> )                    | -2.7  |      |      | -1.7 | 1.5  |
| BANF1         | barrier to autointegration factor 1                                                           | -2.0  | -1.5 |      |      |      |
| BARD1         | BRCA1 associated RING domain 1                                                                | -3.6  | 1.3  | 1.3  |      | 3.4  |
| BAT1          | HLA-B associated transcript 1                                                                 | 1.5   | -1.6 |      |      |      |
| BAT3          | HLA-B associated transcript 3                                                                 | -1.4  | -1.4 |      |      |      |
| BAX           | BCL2-associated X protein                                                                     | -1.8  |      |      |      |      |
| BAZ1B         | bromodomain adjacent to zinc finger domain, 1B                                                | -1.9  | -1.2 |      |      |      |
| BC-2          | chromatin modifying protein 2A                                                                | -1.4  | 1.5  |      |      | 1.5  |
| BCAP29        | B-cell receptor-associated protein 29                                                         | 2.0   | 1.5  |      |      |      |
| BCAT2         | branched chain aminotransferase 2, mitochondrial                                              | 1.7   |      | -1.3 |      | -2.7 |
| BCKDHB        | branched chain keto acid dehydrogenase E1, beta polypeptide (maple syrup urine disease)       | 2.2   |      |      |      | -2.5 |
| BCL10         | B-cell CLL/lymphoma 10                                                                        | 1.2   |      |      |      |      |
| BCL11A        | B-cell CLL/lymphoma 11A (zinc finger protein)                                                 | -1.8  |      |      |      | 1.2  |
| BCL2          | B-cell CLL/lymphoma 2                                                                         | -11.2 | -2.8 |      |      | 1.5  |
| BCL2L11       | BCL2-like 11 (apoptosis facilitator)                                                          | 1.2   | 3.1  | 3.1  | 5.9  | 5.1  |
| BCL7A         | B-cell CLL/lymphoma 7A                                                                        | -3.3  | -1.3 |      |      | 1.5  |
| BCL7B         | B-cell CLL/lymphoma 7B                                                                        | -1.4  |      |      |      |      |
| BCLAF1        | BCL2-associated transcription factor 1                                                        | 2.0   | -1.7 | -1.3 |      | -1.8 |
| BCR           | breakpoint cluster region                                                                     | -1.4  |      |      |      | 4.7  |
| BDH1          | 3-hydroxybutyrate dehydrogenase, type 1                                                       | -1.3  |      | -1.3 | -1.5 | -1.6 |
| BET1          | BET1 homolog ( <i>S. cerevisiae</i> )                                                         | -2.2  |      |      |      | 1.6  |
| BICD2         | bicaudal D homolog 2 ( <i>Drosophila</i> )                                                    | -1.2  |      |      |      | -1.2 |
| BID           | BH3 interacting domain death agonist                                                          | -3.4  | -1.9 | 1.4  |      | -1.3 |
| BIN1          | bridging integrator 1                                                                         | -1.3  |      |      | 1.6  | 9.6  |
| BIRC2         | baculoviral IAP repeat-containing 2                                                           | 1.4   | 1.9  | 1.9  |      | 1.6  |
| BIRC5         | baculoviral IAP repeat-containing 5 (survivin)                                                | -1.8  |      |      |      | 2.4  |
| BLCAP         | bladder cancer associated protein                                                             | 1.4   | -1.5 |      |      | -1.4 |

|          |                                                                                                                |       |      |      |      |        |
|----------|----------------------------------------------------------------------------------------------------------------|-------|------|------|------|--------|
| BLMH     | bleomycin hydrolase                                                                                            | 1.3   |      |      |      |        |
| BLOC1S1  | biogenesis of lysosome-related organelles complex-1, subunit 1                                                 | -1.9  |      |      |      | 1.6    |
| BMP2K    | BMP2 inducible kinase                                                                                          | 1.5   |      |      |      | -1.6   |
| BNIP2    | BCL2/adenovirus E1B 19kDa interacting protein 2                                                                | -1.4  | 1.7  | 1.5  |      | 1.4    |
| BNIP3    | BCL2/adenovirus E1B 19kDa interacting protein 3                                                                | 312.5 |      | 1.4  |      | -331.2 |
| BNIP3L   | BCL2/adenovirus E1B 19kDa interacting protein 3-like                                                           | 2.0   | -1.3 |      |      | 1.9    |
| BPGM     | 2,3-bisphosphoglycerate mutase                                                                                 | -1.5  |      |      |      |        |
| BRCA1    | breast cancer 1, early onset                                                                                   | -1.5  | -1.4 |      |      | -2.6   |
| BRCA2    | breast cancer 2, early onset                                                                                   | -2.7  |      |      |      |        |
| BRD4     | bromodomain containing 4                                                                                       | -1.3  |      |      |      | 1.4    |
| BRMS1    | breast cancer metastasis suppressor 1                                                                          | -1.6  |      |      |      |        |
| BRRN1    | non-SMC condensin I complex, subunit H                                                                         | -1.9  |      |      |      | -1.8   |
| BST2     | bone marrow stromal cell antigen 2                                                                             | -1.5  |      |      |      | 1.4    |
| BTAF1    | BTAF1 RNA polymerase II, B-TFIID transcription factor-associated, 170kDa (Mot1 homolog, <i>S. cerevisiae</i> ) | 1.6   |      |      |      | -2.0   |
| BTG3     | BTG family, member 3                                                                                           | -1.6  |      |      |      | -2.2   |
| BTN3A2   | butyrophilin, subfamily 3, member A2                                                                           | -5.8  |      |      |      | 3.9    |
| BTN3A3   | butyrophilin, subfamily 3, member A3                                                                           | -5.9  | -1.4 |      |      | 4.2    |
| BUB1     | BUB1 budding uninhibited by benzimidazoles 1 homolog (yeast)                                                   | -1.3  | 1.4  |      |      | -1.3   |
| BUB1B    | BUB1 budding uninhibited by benzimidazoles 1 homolog beta (yeast)                                              | -1.9  |      |      |      |        |
| BUB3     | BUB3 budding uninhibited by benzimidazoles 3 homolog (yeast)                                                   | -1.4  | 1.3  |      |      | -1.4   |
| BYSL     | bystin-like                                                                                                    | -6.2  | -8.4 | -2.2 | -2.3 | -4.0   |
| C13ORF24 | chromosome 13 open reading frame 24                                                                            | 1.2   |      |      |      | -1.5   |
| C19ORF10 | chromosome 19 open reading frame 10                                                                            | 1.3   |      |      |      | -2.2   |
| C19ORF2  | chromosome 19 open reading frame 2                                                                             | 1.8   | -1.3 |      |      | -2.7   |
| C1D      | nuclear DNA-binding protein                                                                                    | -1.6  |      |      |      |        |
| C1ORF48  | NSL1, MIND kinetochore complex component, homolog ( <i>S. cerevisiae</i> )                                     | -1.5  |      |      |      | 1.4    |
| C1QBP    | complement component 1, q subcomponent binding protein                                                         | -2.0  | -1.9 | -1.8 |      |        |
| C21ORF33 | chromosome 21 open reading frame 33                                                                            | 1.8   |      | 1.2  |      | -2.5   |
| C5ORF13  | chromosome 5 open reading frame 13                                                                             | -3.7  | -3.3 | -1.3 |      | 4.7    |
| C5ORF18  | receptor accessory protein 5                                                                                   | 3.6   | 1.4  |      |      | -4.6   |
| C5ORF22  | chromosome 5 open reading frame 22                                                                             | 1.2   |      |      |      | -1.3   |
| C6ORF108 | chromosome 6 open reading frame 108                                                                            | 2.7   | -3.3 |      |      | -51.4  |
| C6ORF69  | potassium channel tetramerisation domain containing 20                                                         | -1.3  |      |      |      | 1.2    |
| C7ORF44  | chromosome 7 open reading frame 44                                                                             | 2.8   |      |      |      | -4.8   |
| CABIN1   | calcineurin binding protein 1                                                                                  | -1.3  | -1.4 | 1.7  | 2.0  |        |
| CALM1    | calmodulin 1 (phosphorylase kinase, delta)                                                                     | -1.4  | 1.6  |      |      | 4.4    |
| CALM2    | calmodulin 2 (phosphorylase kinase, delta)                                                                     | -1.2  | 1.2  |      |      |        |
| CALM3    | calmodulin 3 (phosphorylase kinase, delta)                                                                     | -1.5  | 1.2  |      |      | 1.3    |
| CALR     | calreticulin                                                                                                   | 4.7   | -1.4 | -1.9 |      | -5.3   |
| CAMK2G   | calcium/calmodulin-dependent protein kinase (CaM kinase) II gamma                                              | 2.1   |      |      |      | -2.6   |
| CAMK4    | calcium/calmodulin-dependent protein kinase IV                                                                 | -5.8  |      |      |      | 8.0    |
| CAMKK2   | calcium/calmodulin-dependent protein kinase kinase 2, beta                                                     | 1.7   | -2.1 |      |      | -3.7   |

|         |                                                                                                                     |       |      |      |      |       |
|---------|---------------------------------------------------------------------------------------------------------------------|-------|------|------|------|-------|
| CAMLG   | calcium modulating ligand                                                                                           | 2.9   | -1.5 |      |      | -2.0  |
| CAMTA2  | calmodulin binding transcription activator 2                                                                        | -1.5  |      | 1.4  |      | 2.0   |
| CANX    | calnexin                                                                                                            | 1.6   | -1.3 |      |      | -2.5  |
| CAP1    | CAP, adenylate cyclase-associated protein 1 (yeast)                                                                 | 1.3   | 1.3  |      |      | 1.7   |
| CAP350  | centrosomal protein 350kDa                                                                                          | 1.6   | 2.3  |      |      | 1.5   |
| CAPG    | capping protein (actin filament), gelsolin-like                                                                     | -49.5 |      |      |      | 61.6  |
| CAPN2   | calpain 2, (m/II) large subunit                                                                                     | 2.4   |      |      |      | -2.2  |
| CAPN7   | calpain 7                                                                                                           | 1.4   |      |      |      |       |
| CAPNS1  | calpain, small subunit 1                                                                                            | -1.3  |      |      |      | 1.6   |
| CAPZA2  | capping protein (actin filament) muscle Z-line, alpha 2                                                             | -2.1  | 1.8  |      |      | 1.9   |
| CARM1   | coactivator-associated arginine methyltransferase 1                                                                 | -1.8  | -1.7 | -1.6 |      | -1.4  |
| CARS    | cysteinyl-tRNA synthetase                                                                                           | -1.7  | -1.2 |      | -1.4 |       |
| CASK    | calcium/calmodulin-dependent serine protein kinase (MAGUK family)                                                   | -1.3  |      |      |      | 1.2   |
| CASP2   | caspase 2, apoptosis-related cysteine peptidase (neural precursor cell expressed, developmentally down-regulated 2) | -3.1  | -1.8 |      |      | 2.2   |
| CASP6   | caspase 6, apoptosis-related cysteine peptidase                                                                     | 2.4   | 1.4  |      |      | -1.8  |
| CASP8   | caspase 8, apoptosis-related cysteine peptidase                                                                     | 3.2   | 1.5  |      |      | -1.5  |
| CASP9   | caspase 9, apoptosis-related cysteine peptidase                                                                     | -1.3  |      |      |      | 1.3   |
| CAT     | catalase                                                                                                            | 4.5   | -1.3 | 1.3  |      | 1.4   |
| CBFA2T2 | core-binding factor, runt domain, alpha subunit 2; translocated to, 2                                               | 1.5   |      |      |      | -1.3  |
| CBFB    | core-binding factor, beta subunit                                                                                   | -2.3  |      |      |      | 1.5   |
| CBL     | Cas-Br-M (murine) ecotropic retroviral transforming sequence                                                        | 1.6   |      |      |      |       |
| CBLB    | Cas-Br-M (murine) ecotropic retroviral transforming sequence b                                                      | -1.6  | 1.8  |      |      | 4.1   |
| CBX3    | chromobox homolog 3 (HP1 gamma homolog, Drosophila)                                                                 | 2.2   | 1.2  |      |      | -2.1  |
| CBX6    | chromobox homolog 6                                                                                                 | -1.4  | -2.1 |      |      | -2.0  |
| CCDC28A | coiled-coil domain containing 28A                                                                                   | -1.3  |      | 1.6  |      | 1.8   |
| CCDC6   | coiled-coil domain containing 6                                                                                     | 2.6   | 1.9  |      |      | -4.5  |
| CCNA2   | cyclin A2                                                                                                           | -2.2  | 1.3  |      |      | 1.5   |
| CCNB1   | cyclin B1                                                                                                           | -1.5  | 1.9  |      |      | 2.6   |
| CCNC    | cyclin C                                                                                                            | 1.3   |      |      |      | -1.4  |
| CCND3   | cyclin D3                                                                                                           | -10.6 |      |      | -1.8 | 7.2   |
| CCNE1   | cyclin E1                                                                                                           | 2.3   |      |      |      | -14.9 |
| CCNE2   | cyclin E2                                                                                                           | -2.9  | -1.3 | 1.2  |      | 2.2   |
| CCNF    | cyclin F                                                                                                            | -2.6  | 2.0  |      |      | 2.7   |
| CCNG1   | cyclin G1                                                                                                           | 1.8   | 1.3  |      |      |       |
| CCNH    | cyclin H                                                                                                            | 1.6   | 1.3  |      |      | -1.5  |
| CCNI    | cyclin I                                                                                                            | -1.7  | 1.5  |      |      | 1.6   |
| CCNT2   | cyclin T2                                                                                                           | 2.6   | 2.0  |      |      | -2.0  |
| CCT3    | chaperonin containing TCP1, subunit 3 (gamma)                                                                       | 1.2   | -1.6 |      |      | -1.7  |
| CCT6A   | chaperonin containing TCP1, subunit 6A (zeta 1)                                                                     | 4.9   |      | -1.6 | -1.7 | -5.1  |
| CCT8    | chaperonin containing TCP1, subunit 8 (theta)                                                                       | 1.2   | -1.6 |      |      | -1.3  |
| CD164   | CD164 molecule, sialomucin                                                                                          | -1.7  | 1.8  |      |      | 2.6   |
| CD34    | CD34 molecule                                                                                                       | 12.3  | -3.0 |      |      | -18.1 |

|        |                                                                                        |       |      |      |      |       |
|--------|----------------------------------------------------------------------------------------|-------|------|------|------|-------|
| CD37   | CD37 molecule                                                                          | 2.5   |      |      |      | -4.9  |
| CD38   | CD38 molecule                                                                          | -2.9  | -2.4 |      |      | 8.4   |
| CD40   | CD40 molecule, TNF receptor superfamily member 5                                       | -1.4  |      |      |      | 1.3   |
| CD44   | CD44 molecule (Indian blood group)                                                     | 3.2   | -3.0 | -1.7 |      | -13.1 |
| CD47   | CD47 molecule                                                                          | -2.4  | -1.7 | 1.7  |      | 2.0   |
| CD48   | CD48 molecule                                                                          | -14.5 | -2.5 | 1.9  |      | 4.3   |
| CD53   | CD53 molecule                                                                          | 1.4   | 3.1  | 3.1  | 3.2  | 7.2   |
| CD59   | CD59 molecule, complement regulatory protein                                           | -3.7  |      |      | 1.8  | 10.6  |
| CD63   | CD63 molecule                                                                          | 1.4   | 1.2  |      |      |       |
| CD69   | CD69 molecule                                                                          | 6.3   | 3.8  | 4.9  | 2.0  | -1.5  |
| CD72   | CD72 molecule                                                                          | -23.3 | 1.6  |      |      | 31.2  |
| CD79A  | CD79a molecule, immunoglobulin-associated alpha                                        | -24.9 | 1.3  | 2.0  | 3.6  | 24.6  |
| CD81   | CD81 molecule                                                                          | -1.9  |      |      |      | 1.3   |
| CD83   | CD83 molecule                                                                          | 2.1   |      |      |      |       |
| CD99   | CD99 molecule                                                                          | 1.7   | 3.4  |      | 1.8  | 2.6   |
| CDC16  | cell division cycle 16 homolog (S. cerevisiae)                                         | 1.6   | 1.2  |      |      |       |
| CDC2   | cell division cycle 2, G1 to S and G2 to M                                             | -1.6  | 2.0  |      |      |       |
| CDC23  | cell division cycle 23 homolog (S. cerevisiae)                                         | -1.9  | -1.3 |      |      | -2.1  |
| CDC25A | cell division cycle 25 homolog A (S. cerevisiae)                                       | -1.6  | -1.4 | -1.4 |      | -19.4 |
| CDC25B | cell division cycle 25 homolog B (S. cerevisiae)                                       | -1.2  | 1.6  |      |      | 1.6   |
| CDC2L6 | cell division cycle 2-like 6 (CDK8-like)                                               | -1.4  | 3.3  |      | 1.8  | 3.8   |
| CDC6   | cell division cycle 6 homolog (S. cerevisiae)                                          | -1.7  | -2.9 | -1.3 | -1.5 | -4.7  |
| CDC7   | cell division cycle 7 homolog (S. cerevisiae)                                          | -1.4  | -1.4 | 1.3  |      | -2.4  |
| CDH2   | cadherin 2, type 1, N-cadherin (neuronal)                                              | 30.0  |      |      |      | -72.0 |
| CDIPT  | CDP-diacylglycerol--inositol 3-phosphatidyltransferase (phosphatidylinositol synthase) | -1.6  | 1.4  |      |      | 2.8   |
| CDK2   | cyclin-dependent kinase 2                                                              | -2.3  | -1.5 |      |      | -1.6  |
| CDK6   | cyclin-dependent kinase 6                                                              | -3.0  | -1.5 |      |      | 2.1   |
| CDK7   | cyclin-dependent kinase 7 (MO15 homolog, Xenopus laevis, cdk-activating kinase)        | 2.1   |      |      |      | -1.6  |
| CDK8   | cyclin-dependent kinase 8                                                              | -1.5  |      |      |      |       |
| CDK9   | cyclin-dependent kinase 9 (CDC2-related kinase)                                        | -7.3  | 1.7  |      |      | 10.9  |
| CDKN1B | cyclin-dependent kinase inhibitor 1B (p27, Kip1)                                       | -1.6  | 1.6  | 1.7  |      | 3.6   |
| CDKN3  | cyclin-dependent kinase inhibitor 3 (CDK2-associated dual specificity phosphatase)     | -1.4  | 1.5  |      |      | 1.2   |
| CEBPB  | CCAAT/enhancer binding protein (C/EBP), beta                                           | 1.5   | -1.5 |      |      | -3.1  |
| CEBPG  | CCAAT/enhancer binding protein (C/EBP), gamma                                          | -1.3  |      |      |      | -1.6  |
| CEBPZ  | CCAAT/enhancer binding protein zeta                                                    | -1.7  | -1.5 | -1.5 | -1.8 | -2.5  |
| CENPA  | centromere protein A                                                                   | -1.3  | 1.7  |      |      | 1.4   |
| CENPF  | centromere protein F, 350/400ka (mitosin)                                              | -2.3  | 1.5  |      |      | 2.3   |
| CENTB1 | centaurin, beta 1                                                                      | -21.1 |      |      |      | 42.8  |
| CENTB2 | centaurin, beta 2                                                                      | 1.5   | 1.5  |      | 1.3  |       |
| CETN3  | centrin, EF-hand protein, 3 (CDC31 homolog, yeast)                                     | -1.5  |      |      |      |       |
| CFL1   | cofilin 1 (non-muscle)                                                                 | -1.6  |      |      |      | 1.3   |
| CFLAR  | CASP8 and FADD-like apoptosis regulator                                                | 3.8   | 2.1  |      | 1.5  |       |

|         |                                                                                   |      |      |      |      |       |
|---------|-----------------------------------------------------------------------------------|------|------|------|------|-------|
| CHAF1B  | chromatin assembly factor 1, subunit B (p60)                                      | -1.7 |      |      |      | -2.4  |
| CHD3    | chromodomain helicase DNA binding protein 3                                       | -9.4 | -1.3 |      |      | 5.0   |
| CHEK1   | CHK1 checkpoint homolog (S. pombe)                                                | -1.8 | -1.3 |      |      | -2.1  |
| CHES1   | checkpoint suppressor 1                                                           | 1.8  | 1.6  | 1.5  |      | 1.5   |
| CHI3L2  | chitinase 3-like 2                                                                | -3.1 |      |      | -1.8 |       |
| CHP     | calcium binding protein P22                                                       | 2.4  |      |      |      | 1.6   |
| CHRNA5  | cholinergic receptor, nicotinic, alpha 5                                          | -2.2 |      |      |      | 1.7   |
| CHST10  | carbohydrate sulfotransferase 10                                                  | 2.3  |      |      |      | -2.6  |
| CHSY1   | carbohydrate (chondroitin) synthase 1                                             | 1.8  | 2.5  |      |      | -2.1  |
| CHUK    | conserved helix-loop-helix ubiquitous kinase                                      | 1.5  |      |      |      | -1.5  |
| CIAPIN1 | cytokine induced apoptosis inhibitor 1                                            | 1.3  | -1.6 |      |      | -1.8  |
| CITED2  | Cbp/p300-interacting transactivator, with Glu/Asp-rich carboxy-terminal domain, 2 | 10.5 | 2.8  |      |      | -7.0  |
| CKB     | creatine kinase, brain                                                            | 3.2  |      |      |      | -5.0  |
| CKS1B   | CDC28 protein kinase regulatory subunit 1B                                        | -1.6 |      |      |      | -1.4  |
| CKS2    | CDC28 protein kinase regulatory subunit 2                                         | -1.3 | 1.2  |      |      |       |
| CLASP1  | cytoplasmic linker associated protein 1                                           | 1.5  |      |      | 1.7  | 1.8   |
| CLASP2  | cytoplasmic linker associated protein 2                                           | -1.7 | 1.7  |      |      | 2.6   |
| CLCN3   | chloride channel 3                                                                | -3.0 |      |      |      | 3.5   |
| CLEC11A | C-type lectin domain family 11, member A                                          | 1.5  | 1.4  |      |      | -10.9 |
| CLIC1   | chloride intracellular channel 1                                                  | -1.3 | 1.3  |      |      |       |
| CLIC4   | chloride intracellular channel 4                                                  | -2.2 |      |      |      | 2.0   |
| CLK1    | CDC-like kinase 1                                                                 | 1.5  | 1.7  |      |      | 1.6   |
| CLSTN1  | calsyntenin 1                                                                     | 1.3  |      | 1.3  |      | -1.4  |
| CLTA    | clathrin, light chain (Lca)                                                       | 1.4  |      |      |      | -1.3  |
| CLTB    | clathrin, light chain (Lcb)                                                       | -2.0 | -1.4 |      |      | -1.3  |
| CLTC    | clathrin, heavy chain (Hc)                                                        | 1.4  |      |      | -1.5 | -1.3  |
| CNAP1   | non-SMC condensin I complex, subunit D2                                           | -2.7 |      |      |      | 2.2   |
| CNNM2   | cyclin M2                                                                         | 1.7  |      |      |      |       |
| CNOT4   | CCR4-NOT transcription complex, subunit 4                                         | -1.3 | 1.4  |      |      |       |
| CNOT8   | CCR4-NOT transcription complex, subunit 8                                         | -1.4 |      |      |      |       |
| CNP     | 2',3'-cyclic nucleotide 3' phosphodiesterase                                      | -1.3 |      | -1.3 |      |       |
| COBRA1  | cofactor of BRCA1                                                                 | -1.3 |      |      |      |       |
| COG5    | component of oligomeric golgi complex 5                                           | 1.3  | -1.3 |      |      |       |
| COMT    | catechol-O-methyltransferase                                                      | -2.1 |      |      |      |       |
| COPA    | coatamer protein complex, subunit alpha                                           | 1.2  |      |      |      | 1.9   |
| COPB    | coatamer protein complex, subunit beta 1                                          | 1.4  |      |      |      |       |
| COPB2   | coatamer protein complex, subunit beta 2 (beta prime)                             | 1.2  |      |      |      |       |
| COPS2   | COP9 constitutive photomorphogenic homolog subunit 2 (Arabidopsis)                | 1.6  | -1.2 |      |      | -2.4  |
| COPS3   | COP9 constitutive photomorphogenic homolog subunit 3 (Arabidopsis)                | -2.0 | -1.2 |      |      |       |
| COPS6   | COP9 constitutive photomorphogenic homolog subunit 6 (Arabidopsis)                | -1.7 | -1.5 |      |      | -1.8  |
| COPS7A  | COP9 constitutive photomorphogenic homolog subunit 7A (Arabidopsis)               | -1.4 |      |      |      | 1.3   |
| COPS8   | COP9 constitutive photomorphogenic homolog subunit 8 (Arabidopsis)                | -3.2 |      |      |      | 2.6   |

|         |                                                                                     |       |      |      |      |       |
|---------|-------------------------------------------------------------------------------------|-------|------|------|------|-------|
| COX11   | COX11 homolog, cytochrome c oxidase assembly protein (yeast)                        | 4.1   | -1.3 |      |      | -2.9  |
| COX6A1  | cytochrome c oxidase subunit VIa polypeptide 1                                      | -1.2  |      |      |      |       |
| COX8A   | cytochrome c oxidase subunit 8A (ubiquitous)                                        | -1.5  |      |      |      |       |
| CPD     | carboxypeptidase D                                                                  | 25.6  |      | 1.4  |      | -4.0  |
| CPNE1   | copine I                                                                            | -1.5  |      |      |      | 2.1   |
| CPNE3   | copine III                                                                          | -1.5  |      |      |      | 2.7   |
| CPOX    | coproporphyrinogen oxidase                                                          | 1.8   |      | 1.5  |      | -2.6  |
| CPSF1   | cleavage and polyadenylation specific factor 1, 160kDa                              | 2.3   |      |      |      | -2.3  |
| CPSF5   | nudix (nucleoside diphosphate linked moiety X)-type motif 21                        | -1.8  | -1.3 |      |      | -2.2  |
| CPSF6   | cleavage and polyadenylation specific factor 6, 68kDa                               | -1.6  |      |      |      | -2.0  |
| CPT1A   | carnitine palmitoyltransferase 1A (liver)                                           | 1.6   |      |      |      | -2.0  |
| CREB1   | cAMP responsive element binding protein 1                                           | -1.5  | 1.4  |      |      | 2.6   |
| CREBBP  | CREB binding protein (Rubinstein-Taybi syndrome)                                    | -10.0 | 1.3  |      |      | 14.0  |
| CREBL2  | cAMP responsive element binding protein-like 2                                      | -2.6  |      |      |      | 3.0   |
| CREBZF  | CREB/ATF bZIP transcription factor                                                  | -1.5  |      |      |      | -1.9  |
| CREG1   | cellular repressor of E1A-stimulated genes 1                                        | 1.8   | -1.5 | 1.6  |      | -2.3  |
| CREM    | cAMP responsive element modulator                                                   | 7.7   |      |      |      | -1.9  |
| CRI1    | EP300 interacting inhibitor of differentiation 1                                    | 1.9   |      |      |      | -2.5  |
| CRIP1   | cysteine-rich protein 1 (intestinal)                                                | -16.0 |      |      |      | 9.6   |
| CROP    | cisplatin resistance-associated overexpressed protein                               | 1.9   | -1.5 |      |      | -1.7  |
| CRTAP   | cartilage associated protein                                                        | 3.6   | -2.2 |      |      | -3.4  |
| CRYZ    | crystallin, zeta (quinone reductase)                                                | -1.7  | -1.4 |      | -1.6 | 1.3   |
| CSE1L   | CSE1 chromosome segregation 1-like (yeast)                                          | -1.6  | -1.4 |      |      | -2.5  |
| CSK     | c-src tyrosine kinase                                                               | -1.6  |      | -1.8 |      | -1.7  |
| CSNK1A1 | casein kinase 1, alpha 1                                                            | 2.0   | 1.5  |      |      | 1.3   |
| CSNK1D  | casein kinase 1, delta                                                              | 1.4   | 1.3  |      |      |       |
| CSNK1G2 | casein kinase 1, gamma 2                                                            | -1.2  |      |      |      |       |
| CSNK2A1 | casein kinase 2, alpha 1 polypeptide                                                | 1.5   | -1.4 |      |      | -2.0  |
| CSNK2A2 | casein kinase 2, alpha prime polypeptide                                            | 1.9   | 1.9  |      |      |       |
| CSNK2B  | casein kinase 2, beta polypeptide                                                   | -1.3  |      |      |      |       |
| CSPG6   | structural maintenance of chromosomes 3                                             | 2.0   | -1.7 |      | -1.6 | -2.9  |
| CST7    | cystatin F (leukocystatin)                                                          | -26.4 | 2.4  |      |      | 190.4 |
| CSTB    | cystatin B (stefin B)                                                               | 1.5   |      |      |      |       |
| CSTF1   | cleavage stimulation factor, 3' pre-RNA, subunit 1, 50kDa                           | 1.6   | 1.3  |      |      | -1.7  |
| CSTF3   | cleavage stimulation factor, 3' pre-RNA, subunit 3, 77kDa                           | 2.2   |      |      |      | -4.0  |
| CTBP1   | C-terminal binding protein 1                                                        | -1.5  | 1.3  | 1.3  | 1.3  | 2.2   |
| CTCF    | CCCTC-binding factor (zinc finger protein)                                          | -1.2  |      |      |      |       |
| CTDSP2  | CTD (carboxy-terminal domain, RNA polymerase II, polypeptide A) small phosphatase 2 | 1.9   | -1.3 | 1.4  |      | -1.2  |
| CTNNA1  | catenin (cadherin-associated protein), alpha-like 1                                 | -2.0  |      |      | -1.3 |       |
| CTNNB1  | catenin (cadherin-associated protein), beta 1, 88kDa                                | 1.4   | 1.4  |      |      | 2.5   |
| CTPS    | CTP synthase                                                                        | -1.5  | -1.4 |      |      | -2.4  |
| CTR9    | Ctr9, Paf1/RNA polymerase II complex component, homolog (S. cerevisiae)             | 1.4   |      |      |      | -1.9  |

|          |                                                                                             |       |      |      |      |       |
|----------|---------------------------------------------------------------------------------------------|-------|------|------|------|-------|
| CTSB     | cathepsin B                                                                                 | 1.6   | 2.1  |      |      | 2.4   |
| CTSC     | --                                                                                          | 2.7   | -5.2 | -1.5 |      | -7.0  |
| CTSH     | cathepsin H                                                                                 | -1.4  |      |      |      |       |
| CUGBP1   | CUG triplet repeat, RNA binding protein 1                                                   | -1.8  | -1.3 |      |      | -1.4  |
| CUGBP2   | CUG triplet repeat, RNA binding protein 2                                                   | 5.7   | 2.4  | 2.0  | 1.8  | 1.7   |
| CUL1     | cullin 1                                                                                    | -1.3  |      | 1.7  |      |       |
| CUL2     | cullin 2                                                                                    | 3.6   |      |      |      | -3.9  |
| CUL4A    | cullin 4A                                                                                   | 1.5   | 1.4  |      |      | -1.5  |
| CUL5     | cullin 5                                                                                    | 1.4   |      |      |      |       |
| CUTL1    | cut-like 1, CCAAT displacement protein (Drosophila)                                         | -1.5  | 1.7  |      |      | 1.9   |
| CXCR4    | chemokine (C-X-C motif) receptor 4                                                          | -2.5  | 1.8  | 1.3  | 1.5  | 63.4  |
| CXORF40A | chromosome X open reading frame 40A                                                         | -1.2  |      |      |      |       |
| CYB5     | cytochrome b5 type A (microsomal)                                                           | -1.3  | 2.3  |      |      | -1.5  |
| CYB5-M   | cytochrome b5 type B (outer mitochondrial membrane)                                         | -1.4  |      |      |      |       |
| CYC1     | cytochrome c-1                                                                              | 1.5   | -1.6 | -1.3 |      | -4.4  |
| CYCS     | cytochrome c, somatic                                                                       | 4.9   | -1.6 | -1.6 | -1.9 | -13.5 |
| CYFIP1   | cytoplasmic FMR1 interacting protein 1                                                      | -2.0  | 2.3  |      |      | 2.9   |
| CYFIP2   | cytoplasmic FMR1 interacting protein 2                                                      | -44.2 | -2.8 |      | -1.3 | 50.3  |
| CYP51A1  | cytochrome P450, family 51, subfamily A, polypeptide 1                                      | 1.3   |      |      | -1.4 | -2.1  |
| DAAM1    | dishevelled associated activator of morphogenesis 1                                         | -3.4  | 1.7  |      |      | 8.5   |
| DAD1     | defender against cell death 1                                                               | -4.1  |      |      |      | 2.7   |
| DAG1     | dystroglycan 1 (dystrophin-associated glycoprotein 1)                                       | 1.5   |      |      |      |       |
| DAP3     | death associated protein 3                                                                  | 1.9   |      | -1.4 | -1.6 | -1.7  |
| DAPK1    | death-associated protein kinase 1                                                           | 3.4   |      |      |      | -4.0  |
| DAPK3    | death-associated protein kinase 3                                                           | 1.5   | -1.3 | 1.2  |      | -1.8  |
| DARS     | aspartyl-tRNA synthetase                                                                    | 1.3   |      |      |      | -1.5  |
| DATF1    | death inducer-obliterator 1                                                                 | 1.3   | 1.5  |      |      | 1.8   |
| DAZAP2   | DAZ associated protein 2                                                                    | -1.7  |      |      |      | 1.7   |
| DBI      | diazepam binding inhibitor (GABA receptor modulator, acyl-Coenzyme A binding protein)       | -1.9  |      |      |      | 1.5   |
| DBN1     | drebrin 1                                                                                   | -1.5  |      | -1.5 |      |       |
| DCK      | deoxycytidine kinase                                                                        | -1.9  | 1.3  |      |      | 2.4   |
| DCP2     | DCP2 decapping enzyme homolog (S. cerevisiae)                                               | -1.5  | 1.3  |      |      |       |
| DCTN1    | dynactin 1 (p150, glued homolog, Drosophila)                                                | 1.3   |      |      |      | 1.2   |
| DCTN2    | dynactin 2 (p50)                                                                            | 1.4   | 1.5  |      |      | 1.6   |
| DDB2     | damage-specific DNA binding protein 2, 48kDa                                                | -3.2  |      |      |      | 2.1   |
| DDIT4    | DNA-damage-inducible transcript 4                                                           | 5.5   | 4.6  | 4.4  |      | 22.4  |
| DDOST    | dolichyl-diphosphooligosaccharide-protein glycosyltransferase                               | 1.8   |      |      |      | -1.9  |
| DDT      | D-dopachrome tautomerase                                                                    | -1.9  | 1.3  |      |      | 1.6   |
| DDX1     | DEAD (Asp-Glu-Ala-Asp) box polypeptide 1                                                    | 1.2   | -1.3 |      |      | -1.8  |
| DDX10    | DEAD (Asp-Glu-Ala-Asp) box polypeptide 10                                                   | 1.2   | -2.1 |      |      | -2.8  |
| DDX11    | DEAD/H (Asp-Glu-Ala-Asp/His) box polypeptide 11 (CHL1-like helicase homolog, S. cerevisiae) | -2.3  | -1.5 |      |      | -2.2  |
| DDX17    | DEAD (Asp-Glu-Ala-Asp) box polypeptide 17                                                   | 7.2   |      |      |      | -4.4  |

|         |                                                                                       |      |      |      |      |       |
|---------|---------------------------------------------------------------------------------------|------|------|------|------|-------|
| DDX18   | DEAD (Asp-Glu-Ala-Asp) box polypeptide 18                                             | -1.3 | -1.7 |      |      | -2.6  |
| DDX21   | DEAD (Asp-Glu-Ala-Asp) box polypeptide 21                                             | 1.7  | -2.1 | -1.7 |      | -3.9  |
| DDX39   | DEAD (Asp-Glu-Ala-Asp) box polypeptide 39                                             | -1.3 |      |      |      |       |
| DDX3X   | DEAD (Asp-Glu-Ala-Asp) box polypeptide 3, X-linked                                    | -1.8 |      |      | -1.4 | 2.0   |
| DDX42   | DEAD (Asp-Glu-Ala-Asp) box polypeptide 42                                             | 1.6  |      |      |      | -1.6  |
| DDX52   | DEAD (Asp-Glu-Ala-Asp) box polypeptide 52                                             | 1.7  | -1.5 |      |      | -2.0  |
| DECR1   | 2,4-dienoyl CoA reductase 1, mitochondrial                                            | 1.6  |      |      |      | 5.2   |
| DEK     | DEK oncogene (DNA binding)                                                            | -1.9 |      |      |      | 1.4   |
| DEXI    | dexamethasone-induced transcript                                                      | -1.5 |      |      |      | 1.6   |
| DFFA    | DNA fragmentation factor, 45kDa, alpha polypeptide                                    | 1.6  | -2.0 |      |      | -1.8  |
| DGKD    | diacylglycerol kinase, delta 130kDa                                                   | -2.5 |      |      |      | 3.2   |
| DGKG    | diacylglycerol kinase, gamma 90kDa                                                    | 4.1  |      |      | -4.6 | -2.6  |
| DHFR    | dihydrofolate reductase                                                               | -1.7 | -1.9 |      |      | -2.5  |
| DHPS    | deoxyhypusine synthase                                                                | -1.5 |      |      |      |       |
| DHRS1   | dehydrogenase/reductase (SDR family) member 1                                         | 2.3  |      | 1.7  |      | -2.0  |
| DHRS7   | dehydrogenase/reductase (SDR family) member 7                                         | 3.4  |      |      |      | -1.8  |
| DHX15   | DEAH (Asp-Glu-Ala-His) box polypeptide 15                                             | -1.3 | -1.6 |      |      | -1.4  |
| DHX30   | DEAH (Asp-Glu-Ala-His) box polypeptide 30                                             | -2.1 | -1.7 |      |      | 1.8   |
| DHX9    | DEAH (Asp-Glu-Ala-His) box polypeptide 9                                              | -1.4 |      |      |      | 2.3   |
| DIAPH1  | diaphanous homolog 1 (Drosophila)                                                     | -1.7 | -1.4 |      | -1.4 | -1.5  |
| DICER1  | Dicer1, Dcr-1 homolog (Drosophila)                                                    | -1.6 |      |      |      | 1.8   |
| DIP     | death-inducing-protein                                                                | -2.3 | -1.4 |      | 1.8  | 3.5   |
| DLAT    | dihydrolipoamide S-acetyltransferase (E2 component of pyruvate dehydrogenase complex) | -1.6 | -2.1 |      |      | -2.2  |
| DLEU1   | deleted in lymphocytic leukemia, 1                                                    | 1.5  | -1.8 |      |      | -2.0  |
| DLG1    | discs, large homolog 1 (Drosophila)                                                   | -1.5 | -1.9 |      |      | 1.8   |
| DLG5    | discs, large homolog 5 (Drosophila)                                                   | 2.2  | 2.0  |      | 1.3  | 3.1   |
| DLG7    | discs, large homolog 7 (Drosophila)                                                   | -1.3 |      |      |      | 1.8   |
| DMXL1   | Dmx-like 1                                                                            | 2.2  | 1.8  |      |      | 1.6   |
| DMXL2   | Dmx-like 2                                                                            | 1.7  |      | 1.6  |      | -1.2  |
| DNAJA1  | DnaJ (Hsp40) homolog, subfamily A, member 1                                           | -1.7 | -1.4 | -1.3 | -1.7 |       |
| DNAJA2  | DnaJ (Hsp40) homolog, subfamily A, member 2                                           | 15.8 |      |      |      | -25.2 |
| DNAJB1  | DnaJ (Hsp40) homolog, subfamily B, member 1                                           | -1.9 |      |      | -1.4 | 1.5   |
| DNAJB6  | DnaJ (Hsp40) homolog, subfamily B, member 6                                           | -1.7 |      |      |      | 2.0   |
| DNAJC11 | DnaJ (Hsp40) homolog, subfamily C, member 11                                          | 1.4  | 1.9  | -1.2 |      | -1.8  |
| DNAJC13 | DnaJ (Hsp40) homolog, subfamily C, member 13                                          | 2.0  |      |      |      |       |
| DNAJC7  | DnaJ (Hsp40) homolog, subfamily C, member 7                                           | 1.3  | -1.4 |      |      | -1.6  |
| DNC12   | dynein, cytoplasmic 1, intermediate chain 2                                           | 2.9  | 1.4  |      |      | -1.5  |
| DNPEP   | aspartyl aminopeptidase                                                               | -4.5 | -1.6 | -1.2 |      | 1.6   |
| DOC-1R  | CDK2-associated protein 2                                                             | -2.0 | 2.0  |      |      | 2.5   |
| DOCK2   | dedicator of cytokinesis 2                                                            | 1.8  |      |      |      | -2.8  |
| DOK1    | docking protein 1, 62kDa (downstream of tyrosine kinase 1)                            | 2.3  |      |      |      | -2.3  |
| DPH2L1  | DPH1 homolog (S. cerevisiae)                                                          | -1.7 |      |      |      | 1.6   |

|         |                                                                                        |       |      |      |      |       |
|---------|----------------------------------------------------------------------------------------|-------|------|------|------|-------|
| DPT     | dermatopontin                                                                          | -22.5 |      |      |      |       |
| DPYD    | dihydropyrimidine dehydrogenase                                                        | -8.8  |      |      |      | 7.7   |
| DPYSL2  | dihydropyrimidinase-like 2                                                             | -4.2  | 3.1  |      |      | 3.7   |
| DR1     | down-regulator of transcription 1, TBP-binding (negative cofactor 2)                   | -1.6  |      |      |      |       |
| DRAP1   | DR1-associated protein 1 (negative cofactor 2 alpha)                                   | -1.5  | -2.2 |      |      |       |
| DSCR1   | Down syndrome critical region gene 1                                                   | 1.5   | 7.7  | 5.0  | 4.8  | 7.9   |
| DST     | dystonin                                                                               | -8.3  |      |      |      | 15.8  |
| DSTN    | destrin (actin depolymerizing factor)                                                  | 3.9   |      |      |      |       |
| DTX4    | deltex 4 homolog (Drosophila)                                                          | -2.2  |      |      |      | 3.3   |
| DTYMK   | deoxythymidylate kinase (thymidylate kinase)                                           | -1.9  |      |      |      | 1.2   |
| DULLARD | dullard homolog (Xenopus laevis)                                                       | -1.4  | 1.8  |      |      | 1.4   |
| DUSP10  | dual specificity phosphatase 10                                                        | -1.4  |      | 2.7  |      | 1.9   |
| DUSP3   | dual specificity phosphatase 3 (vaccinia virus phosphatase VH1-related)                | 6.4   |      |      |      | -17.5 |
| DUSP6   | dual specificity phosphatase 6                                                         | 15.8  | 1.7  |      |      | -28.2 |
| DVL3    | dishevelled, dsh homolog 3 (Drosophila)                                                | -1.6  |      |      |      | 1.9   |
| DZIP3   | zinc finger DAZ interacting protein 3                                                  | -1.3  |      |      |      | 2.5   |
| E2F1    | E2F transcription factor 1                                                             | -1.7  |      |      | -1.2 | -2.7  |
| EBAG9   | estrogen receptor binding site associated, antigen, 9                                  | -1.8  |      |      |      | 2.5   |
| EBP     | emopamil binding protein (sterol isomerase)                                            | -2.1  |      | -1.2 |      |       |
| EDD1    | E3 ubiquitin protein ligase, HECT domain containing, 1                                 | -1.4  | 1.4  | 1.3  | -1.4 | 1.9   |
| EDEM1   | ER degradation enhancer, mannosidase alpha-like 1                                      | -1.5  | -1.2 |      |      | 1.4   |
| EED     | embryonic ectoderm development                                                         | -1.9  |      |      |      | 1.2   |
| EEF1A1  | eukaryotic translation elongation factor 1 alpha 1                                     | 4.9   |      |      |      | -5.1  |
| EEF1D   | eukaryotic translation elongation factor 1 delta (guanine nucleotide exchange protein) | 1.6   |      |      |      | -1.3  |
| EEF1E1  | eukaryotic translation elongation factor 1 epsilon 1                                   | -1.6  | -3.3 | -1.7 |      | -2.4  |
| EEF2    | eukaryotic translation elongation factor 2                                             | 1.3   |      |      |      |       |
| EFNB2   | ephrin-B2                                                                              | -5.9  | -2.8 |      |      | 5.8   |
| EHBP1   | EH domain binding protein 1                                                            | 1.4   |      |      |      | -2.6  |
| EHD1    | EH-domain containing 1                                                                 | 1.6   |      |      |      | -1.4  |
| EI24    | etoposide induced 2.4 mRNA                                                             | 1.3   | -1.5 |      |      | -2.1  |
| EIF1AX  | eukaryotic translation initiation factor 1A, X-linked                                  | -2.2  | -1.5 |      |      | -2.8  |
| EIF2A   | eukaryotic translation initiation factor 2A, 65kDa                                     | 1.3   |      |      |      | 1.2   |
| EIF2C2  | eukaryotic translation initiation factor 2C, 2                                         | 2.6   | -1.6 |      |      | -4.3  |
| EIF2S1  | eukaryotic translation initiation factor 2, subunit 1 alpha, 35kDa                     | -1.2  | -1.6 | -1.4 | -1.4 | -1.8  |
| EIF2S3  | eukaryotic translation initiation factor 2, subunit 3 gamma, 52kDa                     | 1.3   |      |      |      |       |
| EIF3S10 | eukaryotic translation initiation factor 3, subunit 10 theta, 150/170kDa               | 3.9   | -1.3 |      | -1.7 | -5.4  |
| EIF3S6  | eukaryotic translation initiation factor 3, subunit 6 48kDa                            | -1.5  | -1.6 |      |      |       |
| EIF3S7  | eukaryotic translation initiation factor 3, subunit 7 zeta, 66/67kDa                   | 1.3   |      |      |      | -1.3  |
| EIF3S8  | eukaryotic translation initiation factor 3, subunit 8, 110kDa                          | -3.1  | -1.4 | -1.2 |      | 3.4   |
| EIF3S9  | eukaryotic translation initiation factor 3, subunit 9 eta, 116kDa                      | -1.2  | -2.0 | -1.5 |      | -2.2  |
| EIF4A2  | eukaryotic translation initiation factor 4A, isoform 2                                 | 1.4   |      |      |      |       |
| EIF4B   | eukaryotic translation initiation factor 4B                                            | 1.8   | -2.4 |      |      | -1.8  |

|         |                                                                                                                                                            |       |      |      |      |      |
|---------|------------------------------------------------------------------------------------------------------------------------------------------------------------|-------|------|------|------|------|
| EIF4E   | eukaryotic translation initiation factor 4E                                                                                                                | -1.3  |      |      |      | -1.4 |
| EIF4E2  | eukaryotic translation initiation factor 4E family member 2                                                                                                | -1.6  | 1.2  |      |      | 1.5  |
| EIF5    | eukaryotic translation initiation factor 5                                                                                                                 | 1.2   |      |      |      | -1.8 |
| EIF5A   | eukaryotic translation initiation factor 5A                                                                                                                | -10.2 | -2.0 |      |      | 3.5  |
| EIF5B   | eukaryotic translation initiation factor 5B                                                                                                                | 2.5   | -1.6 |      |      | -4.3 |
| ELF1    | E74-like factor 1 (ets domain transcription factor)                                                                                                        | -1.8  | 1.4  |      |      | 2.7  |
| ELF2    | E74-like factor 2 (ets domain transcription factor)                                                                                                        | -1.8  |      |      |      | 1.4  |
| ELK3    | ELK3, ETS-domain protein (SRF accessory protein 2)                                                                                                         | 5.2   |      |      |      | -2.4 |
| ELMO1   | engulfment and cell motility 1                                                                                                                             | 3.6   | 2.1  |      |      |      |
| ELOVL5  | ELOVL family member 5, elongation of long chain fatty acids (FEN1/Elo2, SUR4/Elo3-like, yeast)                                                             | -1.6  | 1.3  |      |      | 1.8  |
| ENTH    | clathrin interactor 1                                                                                                                                      | 2.5   | 1.9  |      |      | -1.5 |
| ENTPD4  | ectonucleoside triphosphate diphosphohydrolase 4                                                                                                           | 1.5   | 1.3  |      |      |      |
| EP400   | E1A binding protein p400                                                                                                                                   | 1.3   | 1.4  |      |      |      |
| EPB41L2 | erythrocyte membrane protein band 4.1-like 2                                                                                                               | 1.8   |      |      |      | -1.9 |
| EPIM    | syntaxin 2                                                                                                                                                 | 1.3   |      |      |      |      |
| EPM2A   | epilepsy, progressive myoclonus type 2A, Lafora disease (laforin)                                                                                          | -2.2  |      |      |      |      |
| EPOR    | erythropoietin receptor                                                                                                                                    | 16.6  |      |      |      | -6.1 |
| EPRS    | glutamyl-prolyl-tRNA synthetase                                                                                                                            | 1.3   | -1.7 |      |      | -2.4 |
| EPS15   | epidermal growth factor receptor pathway substrate 15                                                                                                      | 1.6   | 1.8  | 1.3  |      | 1.5  |
| ERCC1   | excision repair cross-complementing rodent repair deficiency, complementation group 1 (includes overlapping antisense sequence)                            | -1.8  | 1.3  | -1.3 |      |      |
| ERCC5   | excision repair cross-complementing rodent repair deficiency, complementation group 5 (xeroderma pigmentosum, complementation group G (Cockayne syndrome)) | -1.4  |      |      |      | 1.8  |
| ERF     | Ets2 repressor factor                                                                                                                                      | 2.1   | -1.5 |      |      | -2.5 |
| ERH     | enhancer of rudimentary homolog (Drosophila)                                                                                                               | -1.2  |      |      |      |      |
| ERP29   | endoplasmic reticulum protein 29                                                                                                                           | 1.4   | -1.3 |      |      | -1.8 |
| ESD     | esterase D/formylglutathione hydrolase                                                                                                                     | 2.3   | 1.7  |      |      | -1.9 |
| ETF1    | eukaryotic translation termination factor 1                                                                                                                | 1.3   | -1.6 |      |      | -2.4 |
| ETFA    | electron-transfer-flavoprotein, alpha polypeptide (glutaric aciduria II)                                                                                   | -1.3  |      |      |      |      |
| ETHE1   | ethylmalonic encephalopathy 1                                                                                                                              | 1.6   | -1.3 |      |      | -1.6 |
| ETS1    | v-ets erythroblastosis virus E26 oncogene homolog 1 (avian)                                                                                                | -29.1 |      |      |      | 26.5 |
| ETS2    | v-ets erythroblastosis virus E26 oncogene homolog 2 (avian)                                                                                                | -1.5  | 5.1  | -1.3 | -1.7 | 4.1  |
| ETV6    | ets variant gene 6 (TEL oncogene)                                                                                                                          | 2.5   | -1.6 |      |      | -3.1 |
| EXO1    | exonuclease 1                                                                                                                                              | -1.6  | -2.1 |      |      | -4.6 |
| EXOSC8  | exosome component 8                                                                                                                                        | -2.4  |      |      |      |      |
| EXTL2   | exostoses (multiple)-like 2                                                                                                                                | 1.5   | -2.0 |      |      | -1.9 |
| EZH1    | enhancer of zeste homolog 1 (Drosophila)                                                                                                                   | 1.3   | -1.4 |      |      | 2.0  |
| EZH2    | enhancer of zeste homolog 2 (Drosophila)                                                                                                                   | -1.6  |      |      |      | -1.3 |
| F8A1    | coagulation factor VIII-associated (intronic transcript) 1                                                                                                 | 1.6   |      | 1.2  |      | -2.1 |
| FABP5   | fatty acid binding protein 5 (psoriasis-associated)                                                                                                        | -2.2  | -4.4 |      |      | -2.5 |
| FADS1   | fatty acid desaturase 1                                                                                                                                    | -1.5  | -1.5 |      | -1.9 | -1.8 |
| FADS2   | fatty acid desaturase 2                                                                                                                                    | -1.9  | -2.0 |      |      |      |
| FADS3   | fatty acid desaturase 3                                                                                                                                    | -3.1  |      | -1.2 |      | 5.6  |
| FAH     | fumarylacetoacetate hydrolase (fumarylacetoacetase)                                                                                                        | 1.6   |      | -1.5 |      | -2.8 |

|          |                                                                                                                 |       |      |      |      |      |
|----------|-----------------------------------------------------------------------------------------------------------------|-------|------|------|------|------|
| FALZ     | bromodomain PHD finger transcription factor                                                                     | 1.6   | -1.5 |      |      | -1.3 |
| FAM38A   | family with sequence similarity 38, member A                                                                    | 2.6   | 2.6  |      |      | 1.8  |
| FAM89B   | family with sequence similarity 89, member B                                                                    | -2.5  |      |      |      | 5.2  |
| FANCL    | Fanconi anemia, complementation group L                                                                         | 1.6   |      |      |      | -2.8 |
| FARSLA   | phenylalanine-tRNA synthetase-like, alpha subunit                                                               | 1.6   | -2.1 | -1.9 | -2.0 | -4.1 |
| FBL      | fibrillarin                                                                                                     | 1.4   | -1.2 | -1.4 | -1.4 | -2.1 |
| FBXO9    | F-box protein 9                                                                                                 | 2.2   | -1.4 |      |      | -1.9 |
| FBXW11   | F-box and WD-40 domain protein 11                                                                               | 1.3   | 1.3  |      |      |      |
| FCHSD2   | FCH and double SH3 domains 2                                                                                    | 1.9   | 3.0  |      |      | 4.0  |
| FDFT1    | farnesyl-diphosphate farnesyltransferase 1                                                                      | 1.4   |      |      |      | -1.2 |
| FDPS     | farnesyl diphosphate synthase (farnesyl pyrophosphate synthetase, dimethylallyltransferase, geranyltransferase) | -2.3  |      |      |      | 1.6  |
| FEN1     | flap structure-specific endonuclease 1                                                                          | -1.3  | -1.8 |      |      | -2.9 |
| FEZ2     | fasciculation and elongation protein zeta 2 (zygin II)                                                          | 1.5   |      |      |      | 1.6  |
| FGF9     | fibroblast growth factor 9 (glia-activating factor)                                                             | -45.7 | -2.1 |      |      | 39.2 |
| FGFR1    | fibroblast growth factor receptor 1 (fms-related tyrosine kinase 2, Pfeiffer syndrome)                          | 7.4   |      | 1.6  |      | -1.6 |
| FGFR1OP  | FGFR1 oncogene partner                                                                                          | 1.5   |      |      |      | -2.7 |
| FH       | fumarate hydratase                                                                                              | -1.4  | -2.1 |      |      | -2.6 |
| FHL1     | four and a half LIM domains 1                                                                                   | -2.1  | 1.8  | 3.3  | 13.7 | 9.6  |
| FIBP     | fibroblast growth factor (acidic) intracellular binding protein                                                 | -1.8  | -1.3 |      |      |      |
| FKBP1A   | FK506 binding protein 1A, 12kDa                                                                                 | 1.5   | -1.3 |      | 1.3  | -1.7 |
| FKBP4    | FK506 binding protein 4, 59kDa                                                                                  | 3.0   |      |      |      | -8.6 |
| FKBP5    | FK506 binding protein 5                                                                                         | 7.0   | 21.4 | 6.6  | 4.4  | 13.7 |
| FLII     | flightless I homolog (Drosophila)                                                                               | -1.4  |      |      |      | 1.8  |
| FLJ12443 | acyltransferase like 2                                                                                          | -1.6  |      |      |      |      |
| FLNA     | filamin A, alpha (actin binding protein 280)                                                                    | -2.2  |      |      |      | 3.1  |
| FLNB     | filamin B, beta (actin binding protein 278)                                                                     | 1.6   |      |      |      |      |
| FMR1     | fragile X mental retardation 1                                                                                  | -2.3  | 1.4  |      |      | 2.8  |
| FNBP1    | formin binding protein 1                                                                                        | -17.0 | -2.9 |      |      | 13.3 |
| FNBP1L   | formin binding protein 1-like                                                                                   | 1.4   | 3.0  | 1.9  |      | 3.5  |
| FNBP3    | PRP40 pre-mRNA processing factor 40 homolog A (yeast)                                                           | 2.2   | -2.1 |      |      | -2.4 |
| FNBP4    | formin binding protein 4                                                                                        | -1.4  | -1.6 |      |      |      |
| FNTA     | farnesyltransferase, CAAX box, alpha                                                                            | 1.4   |      |      |      | -1.2 |
| FOSL2    | FOS-like antigen 2                                                                                              | 7.1   | 4.0  |      | 1.4  | -1.9 |
| FOXJ2    | forkhead box J2                                                                                                 | -2.0  |      |      |      | 2.0  |
| FOXK2    | forkhead box K2                                                                                                 | 1.8   |      |      | -1.4 | -1.8 |
| FOXO1    | forkhead box O1                                                                                                 | -3.5  | 1.4  |      |      | 2.2  |
| FOXO3A   | forkhead box O3A                                                                                                | 1.7   | 2.7  |      |      | 2.3  |
| FSCN1    | fascin homolog 1, actin-bundling protein (Strongylocentrotus purpuratus)                                        | 1.7   | 1.6  | -1.5 |      | -3.9 |
| FTH1     | ferritin, heavy polypeptide 1                                                                                   | -2.0  | 1.5  |      |      | 2.9  |
| FTL      | ferritin, light polypeptide                                                                                     | 1.9   | -1.4 |      |      | -2.3 |
| FTSJ1    | FtsJ homolog 1 (E. coli)                                                                                        | 1.2   | -1.3 |      |      | -2.4 |
| FUBP1    | far upstream element (FUSE) binding protein 1                                                                   | 1.7   | -1.8 |      |      | -1.9 |

|         |                                                                                                                            |       |      |      |      |       |
|---------|----------------------------------------------------------------------------------------------------------------------------|-------|------|------|------|-------|
| FUS     | fusion (involved in t(12;16) in malignant liposarcoma)                                                                     | -2.6  | -1.5 |      |      | 1.5   |
| FUSIP1  | FUS interacting protein (serine/arginine-rich) 1                                                                           | -1.5  | -1.9 |      |      |       |
| FUT4    | fucosyltransferase 4 (alpha (1,3) fucosyltransferase, myeloid-specific)                                                    | 1.3   | 1.7  |      |      |       |
| FUT8    | fucosyltransferase 8 (alpha (1,6) fucosyltransferase)                                                                      | -1.4  |      |      |      |       |
| FXR1    | fragile X mental retardation, autosomal homolog 1                                                                          | 1.4   | 1.4  |      |      | 1.4   |
| FYB     | FYN binding protein (FYB-120/130)                                                                                          | 11.8  |      |      |      | -7.9  |
| FYN     | FYN oncogene related to SRC, FGR, YES                                                                                      | -8.6  |      | 1.2  |      | 2.0   |
| FZD6    | frizzled homolog 6 (Drosophila)                                                                                            | 10.1  | 2.1  | 1.5  |      | -2.9  |
| FZR1    | fizzy/cell division cycle 20 related 1 (Drosophila)                                                                        | -1.9  |      |      |      | 2.3   |
| G1P2    | ISG15 ubiquitin-like modifier                                                                                              | -3.1  |      |      |      | 2.0   |
| G3BP    | GTPase activating protein (SH3 domain) binding protein 1                                                                   | 1.4   | -2.2 |      |      | -4.3  |
| G3BP2   | GTPase activating protein (SH3 domain) binding protein 2                                                                   | 1.3   |      |      |      | -1.7  |
| GABARAP | GABA(A) receptor-associated protein                                                                                        | -1.3  |      |      |      | 2.1   |
| GABPB2  | GA binding protein transcription factor, beta subunit 2                                                                    | -1.7  | 1.5  |      |      | 1.8   |
| GADD45B | growth arrest and DNA-damage-inducible, beta                                                                               | 1.3   | 1.5  |      |      | 1.4   |
| GAK     | cyclin G associated kinase                                                                                                 | 1.4   |      |      |      |       |
| GALC    | galactosylceramidase                                                                                                       | -2.1  |      |      |      | 1.5   |
| GALK2   | galactokinase 2                                                                                                            | 1.3   |      |      |      | -1.7  |
| GALNT1  | UDP-N-acetyl-alpha-D-galactosamine:polypeptide N-acetylgalactosaminyltransferase 1 (GalNAc-T1)                             | 2.0   |      |      |      | -2.2  |
| GALNT2  | UDP-N-acetyl-alpha-D-galactosamine:polypeptide N-acetylgalactosaminyltransferase 2 (GalNAc-T2)                             | -2.2  | 1.4  |      |      | 1.9   |
| GAPD    | glyceraldehyde-3-phosphate dehydrogenase                                                                                   | -1.2  |      |      |      | 1.3   |
| GAPDHS  | glyceraldehyde-3-phosphate dehydrogenase, spermatogenic                                                                    | 1.8   |      |      |      | -2.4  |
| GARS    | glycyl-tRNA synthetase                                                                                                     | 1.9   | -2.1 | -1.4 | -1.7 | -4.3  |
| GART    | phosphoribosylglycinamide formyltransferase, phosphoribosylglycinamide synthetase, phosphoribosylaminoimidazole synthetase | 1.4   | -2.4 | -1.6 |      | -4.2  |
| GAS7    | growth arrest-specific 7                                                                                                   | -10.7 | 1.5  |      |      | 7.5   |
| GATA3   | GATA binding protein 3                                                                                                     | -3.1  |      |      |      | 3.3   |
| GBAS    | glioblastoma amplified sequence                                                                                            | 4.0   |      |      |      | -3.2  |
| GCAT    | glycine C-acetyltransferase (2-amino-3-ketobutyrate coenzyme A ligase)                                                     | 9.1   | -1.4 |      |      | -10.8 |
| GCH1    | GTP cyclohydrolase 1 (dopa-responsive dystonia)                                                                            | -1.7  | -1.7 |      |      | 1.5   |
| GCLC    | glutamate-cysteine ligase, catalytic subunit                                                                               | 2.0   | 1.7  |      |      | -1.3  |
| GCLM    | glutamate-cysteine ligase, modifier subunit                                                                                | -2.5  | 2.4  |      |      | 3.6   |
| GCN1L1  | GCN1 general control of amino-acid synthesis 1-like 1 (yeast)                                                              | 1.3   | -1.4 |      |      | -1.5  |
| GCSH    | glycine cleavage system protein H (aminomethyl carrier)                                                                    | 2.1   | -3.0 | -1.6 |      | -4.6  |
| GDI1    | GDP dissociation inhibitor 1                                                                                               | -1.6  | 1.4  |      |      | 2.4   |
| GDI2    | GDP dissociation inhibitor 2                                                                                               | 1.7   | 1.4  |      |      |       |
| GEMIN4  | gem (nuclear organelle) associated protein 4                                                                               | -1.6  |      |      | -1.5 | -3.0  |
| GF11    | growth factor independent 1                                                                                                | 65.2  |      |      |      | -5.9  |
| GFPT1   | glutamine-fructose-6-phosphate transaminase 1                                                                              | -2.1  |      |      |      |       |
| GGA3    | golgi associated, gamma adaptin ear containing, ARF binding protein 3                                                      | 2.0   |      |      | -1.5 |       |
| GGH     | gamma-glutamyl hydrolase (conjugase, foylpolgamma glutamyl hydrolase)                                                      | -2.7  | 1.2  |      |      | 1.3   |
| GGPS1   | geranylgeranyl diphosphate synthase 1                                                                                      | -1.5  | 1.2  |      |      | -1.2  |
| GIT2    | G protein-coupled receptor kinase interactor 2                                                                             | 12.8  |      |      |      | -2.8  |

|         |                                                                         |       |      |      |      |       |
|---------|-------------------------------------------------------------------------|-------|------|------|------|-------|
| GJA7    | gap junction protein, alpha 7, 45kDa (connexin 45)                      | -13.5 | 1.6  |      |      | 43.1  |
| GLA     | galactosidase, alpha                                                    | 2.3   |      |      |      | -3.6  |
| GLB1    | galactosidase, beta 1                                                   | 2.3   |      | 1.4  | 1.9  | -1.9  |
| GLMN    | glomulin, FKBP associated protein                                       | 3.5   |      |      |      | -2.2  |
| GLO1    | glyoxalase I                                                            | 1.3   | -1.5 |      |      | -2.0  |
| GLRX    | glutaredoxin (thioltransferase)                                         | -4.0  | 1.6  | 3.4  |      | 4.4   |
| GLS     | glutaminase                                                             | 2.1   | -2.1 |      | 1.7  | -2.2  |
| GLUL    | glutamate-ammonia ligase (glutamine synthetase)                         | 2.3   | 2.5  | 1.9  |      | 1.8   |
| GMPS    | guanine monphosphate synthetase                                         | -1.4  | -1.4 |      |      | -2.1  |
| GNA11   | guanine nucleotide binding protein (G protein), alpha 11 (Gq class)     | 1.6   |      |      |      | -4.6  |
| GNA13   | guanine nucleotide binding protein (G protein), alpha 13                | 1.6   |      |      |      | -1.5  |
| GNA15   | guanine nucleotide binding protein (G protein), alpha 15 (Gq class)     | -3.2  | 1.4  |      |      |       |
| GNAQ    | guanine nucleotide binding protein (G protein), q polypeptide           | 5.0   | 1.3  |      |      | -1.6  |
| GNAS    | GNAS complex locus                                                      | -1.7  | 1.7  |      |      | 2.4   |
| GNB1    | guanine nucleotide binding protein (G protein), beta polypeptide 1      | -1.4  |      |      |      | 1.7   |
| GNB2    | guanine nucleotide binding protein (G protein), beta polypeptide 2      | -1.7  | 1.4  |      |      | 1.7   |
| GNB5    | guanine nucleotide binding protein (G protein), beta 5                  | -2.8  | -1.3 |      |      |       |
| GNE     | glucosamine (UDP-N-acetyl)-2-epimerase/N-acetylmannosamine kinase       | -3.9  |      |      | -1.4 | 2.5   |
| GNL1    | guanine nucleotide binding protein-like 1                               | -1.3  |      |      |      |       |
| GNPDA1  | glucosamine-6-phosphate deaminase 1                                     | 11.5  |      |      |      | -59.9 |
| GNS     | glucosamine (N-acetyl)-6-sulfatase (Sanfilippo disease IIID)            | 2.8   |      |      |      | -2.0  |
| GOLGA2  | golgi autoantigen, golgin subfamily a, 2                                | 1.7   |      |      |      |       |
| GORASP2 | golgi reassembly stacking protein 2, 55kDa                              | 1.8   | -1.3 |      |      | -2.0  |
| GOSR1   | golgi SNAP receptor complex member 1                                    | 1.5   |      |      |      | -1.7  |
| GPS2    | G protein pathway suppressor 2                                          | -4.7  |      |      |      | 3.8   |
| GPSM2   | G-protein signalling modulator 2 (AGS3-like, C. elegans)                | -1.8  | 1.6  | 1.7  |      | 2.7   |
| GPSM3   | G-protein signalling modulator 3 (AGS3-like, C. elegans)                | -1.9  |      |      |      | 3.0   |
| GPSN2   | glycoprotein, synaptic 2                                                | -1.3  |      |      |      | -1.5  |
| GPX1    | glutathione peroxidase 1                                                | 1.7   | 1.7  |      |      |       |
| GPX4    | glutathione peroxidase 4 (phospholipid hydroperoxidase)                 | 1.8   |      |      |      | -2.2  |
| GPX7    | glutathione peroxidase 7                                                | 1.9   |      |      |      | -1.5  |
| GRB10   | growth factor receptor-bound protein 10                                 | -12.4 | -1.4 |      |      | 11.1  |
| GRB2    | growth factor receptor-bound protein 2                                  | 1.9   | -1.8 |      |      | -3.3  |
| GREB1   | GREB1 protein                                                           | 8.1   |      |      | 2.6  | -11.0 |
| GREM1   | gremlin 1, cysteine knot superfamily, homolog ( <i>Xenopus laevis</i> ) | -42.1 |      |      |      |       |
| GRHPR   | glyoxylate reductase/hydroxypyruvate reductase                          | 1.4   | -1.6 |      |      | -1.3  |
| GRIK5   | glutamate receptor, ionotropic, kainate 5                               | 4.2   |      |      |      | -14.5 |
| GRK5    | G protein-coupled receptor kinase 5                                     | 14.8  | 2.8  |      |      | -3.8  |
| GRK6    | G protein-coupled receptor kinase 6                                     | -3.3  |      |      |      | 2.2   |
| GRLF1   | glucocorticoid receptor DNA binding factor 1                            | 1.4   |      |      |      | -1.2  |
| GSK3B   | glycogen synthase kinase 3 beta                                         | 2.1   | 1.3  |      |      | -2.3  |
| GSPT1   | G1 to S phase transition 1                                              | -1.6  | -1.2 | -1.5 | -1.8 | -1.4  |

|         |                                                                                                                                      |      |      |      |      |      |
|---------|--------------------------------------------------------------------------------------------------------------------------------------|------|------|------|------|------|
| GSR     | glutathione reductase                                                                                                                | -1.6 |      |      |      | 1.2  |
| GSTO1   | glutathione S-transferase omega 1                                                                                                    | 1.8  | -1.3 |      |      | -3.0 |
| GSTP1   | glutathione S-transferase pi                                                                                                         | -1.2 |      |      |      | -1.7 |
| GTF2A2  | general transcription factor IIA, 2, 12kDa                                                                                           | -2.8 | -1.2 |      | 1.5  | 1.6  |
| GTF2B   | general transcription factor IIB                                                                                                     | -1.2 |      |      |      |      |
| GTF2E2  | general transcription factor IIE, polypeptide 2, beta 34kDa                                                                          | -1.5 | -1.3 | -1.4 |      |      |
| GTF2H1  | general transcription factor IIH, polypeptide 1, 62kDa                                                                               | 1.3  | -1.3 |      |      | -2.0 |
| GTF2H2  | general transcription factor IIH, polypeptide 2, 44kDa                                                                               | 2.1  |      |      |      | -3.2 |
| GTF2H4  | general transcription factor IIH, polypeptide 4, 52kDa                                                                               | 1.7  |      |      | -1.3 |      |
| GTF2I   | general transcription factor II, i                                                                                                   | -2.1 |      |      |      | 2.3  |
| GTF3A   | general transcription factor IIIA                                                                                                    | -1.7 | -1.4 |      |      | -2.0 |
| GTF3C1  | general transcription factor IIIC, polypeptide 1, alpha 220kDa                                                                       | -1.3 |      |      |      | 1.7  |
| GTPBP6  | GTP binding protein 6 (putative)                                                                                                     | -2.2 |      |      |      | 1.8  |
| GTSE1   | G-2 and S-phase expressed 1                                                                                                          | -1.7 | 1.6  |      |      | 2.0  |
| GUSB    | glucuronidase, beta                                                                                                                  | 1.2  |      |      |      |      |
| GYPC    | glycophorin C (Gerbich blood group)                                                                                                  | 1.8  |      |      | 2.8  | -1.8 |
| GYS1    | glycogen synthase 1 (muscle)                                                                                                         | 1.5  | -1.3 |      |      |      |
| H1F0    | H1 histone family, member 0                                                                                                          | 8.1  | 2.4  |      | 2.5  | -5.6 |
| H1FX    | H1 histone family, member X                                                                                                          | -3.2 |      | 1.5  | 1.3  | 3.7  |
| H2AFX   | H2A histone family, member X                                                                                                         | -2.6 |      |      |      | 1.3  |
| H2AFY   | H2A histone family, member Y                                                                                                         | -1.9 | -1.6 |      |      | -2.8 |
| H3F3A   | H3 histone, family 3A                                                                                                                | -1.2 |      |      |      | 1.3  |
| H3F3B   | H3 histone, family 3B (H3.3B)                                                                                                        | 4.1  | 1.3  |      |      | -2.2 |
| H41     | CDV3 homolog (mouse)                                                                                                                 | 1.3  | -1.2 |      |      | -1.4 |
| H6PD    | hexose-6-phosphate dehydrogenase (glucose 1-dehydrogenase)                                                                           | -2.4 |      |      |      |      |
| HADH2   | hydroxysteroid (17-beta) dehydrogenase 10                                                                                            | -1.2 |      |      |      |      |
| HADHB   | hydroxyacyl-Coenzyme A dehydrogenase/3-ketoacyl-Coenzyme A thiolase/enoyl-Coenzyme A hydratase (trifunctional protein), beta subunit | 1.8  |      |      |      | -1.4 |
| HAN11   | WD repeat domain 68                                                                                                                  | 1.8  | -1.2 |      |      | -1.7 |
| HAT1    | histone acetyltransferase 1                                                                                                          | 1.6  |      |      |      | -4.0 |
| HAX1    | HCLS1 associated protein X-1                                                                                                         | -1.3 | -1.7 |      | -1.3 | -1.3 |
| HBP1    | HMG-box transcription factor 1                                                                                                       | 1.6  | 1.4  |      | 1.6  | 1.5  |
| HCFC1   | host cell factor C1 (VP16-accessory protein)                                                                                         | -1.5 |      |      |      | 1.2  |
| HCLS1   | hematopoietic cell-specific Lyn substrate 1                                                                                          | -1.6 | -1.4 |      |      | 1.8  |
| HDAC3   | histone deacetylase 3                                                                                                                | 1.5  |      |      |      |      |
| HDAC4   | histone deacetylase 4                                                                                                                | 2.6  | -1.8 |      |      | 1.3  |
| HDLBP   | high density lipoprotein binding protein (vigilin)                                                                                   | -1.7 | -1.6 |      |      |      |
| HELZ    | helicase with zinc finger                                                                                                            | 1.5  |      |      |      | -1.3 |
| HERPUD1 | homocysteine-inducible, endoplasmic reticulum stress-inducible, ubiquitin-like domain member 1                                       | -2.1 |      |      |      | 2.1  |
| HEXIM1  | hexamethylene bis-acetamide inducible 1                                                                                              | 4.5  | 1.8  |      |      | -2.2 |
| HGS     | hepatocyte growth factor-regulated tyrosine kinase substrate                                                                         | 1.5  |      |      |      | -1.7 |
| HHEX    | homeobox, hematopoietically expressed                                                                                                | 3.4  | -2.0 |      |      | -5.4 |
| HINT1   | histidine triad nucleotide binding protein 1                                                                                         | 1.3  | 1.4  |      |      |      |

|           |                                                                                          |       |      |      |      |       |
|-----------|------------------------------------------------------------------------------------------|-------|------|------|------|-------|
| HIP1R     | huntingtin interacting protein 1 related                                                 | -1.5  | 2.3  |      |      | 1.6   |
| HIP2      | huntingtin interacting protein 2                                                         | -1.6  | -1.2 |      |      | -2.2  |
| HIPK3     | homeodomain interacting protein kinase 3                                                 | 1.3   | 1.5  |      |      | 1.5   |
| HISPPD2A  | histidine acid phosphatase domain containing 2A                                          | -3.1  |      |      |      | 2.5   |
| HIST2H2AA | histone cluster 2, H2aa3                                                                 | -2.0  |      |      |      | 2.9   |
| HIVEP1    | human immunodeficiency virus type I enhancer binding protein 1                           | 1.4   | 2.4  |      |      | -1.5  |
| HIVEP2    | human immunodeficiency virus type I enhancer binding protein 2                           | -6.5  |      |      |      | 10.1  |
| HK2       | hexokinase 2                                                                             | 1.4   | -3.1 | -2.0 |      | -2.3  |
| HLA-A     | major histocompatibility complex, class I, A                                             | -2.5  |      | 1.5  |      | 2.7   |
| HLA-B     | major histocompatibility complex, class I, B                                             | -3.4  | 1.2  |      |      | 3.7   |
| HLA-DMB   | major histocompatibility complex, class II, DM beta                                      | -1.7  |      |      |      |       |
| HLA-F     | major histocompatibility complex, class I, F                                             | -3.0  | 2.2  |      |      | 4.7   |
| HLA-G     | HLA-G histocompatibility antigen, class I, G                                             | -2.0  | 1.5  | 1.5  | 1.3  | 1.9   |
| HMBS      | hydroxymethylbilane synthase                                                             | -1.6  |      |      |      | -1.9  |
| HMGB1     | high-mobility group box 1                                                                | -3.0  |      |      |      | 1.9   |
| HMGCR     | 3-hydroxy-3-methylglutaryl-Coenzyme A reductase                                          | -1.9  |      | -1.4 |      | 2.0   |
| HMGCS1    | 3-hydroxy-3-methylglutaryl-Coenzyme A synthase 1 (soluble)                               | -3.5  |      | -2.3 | -1.5 | 2.4   |
| HMMR      | hyaluronan-mediated motility receptor (RHAMM)                                            | -1.5  | 1.8  |      |      | 3.3   |
| HNRPA0    | heterogeneous nuclear ribonucleoprotein A0                                               | 1.5   |      |      |      | -1.5  |
| HNRPA1    | heterogeneous nuclear ribonucleoprotein A1                                               | 1.9   | 1.4  |      |      | -1.8  |
| HNRPA2B1  | heterogeneous nuclear ribonucleoprotein A2/B1                                            | 5.0   |      |      |      | -2.4  |
| HNRPA3    | heterogeneous nuclear ribonucleoprotein A3                                               | 1.8   | -1.4 |      |      | -2.4  |
| HNRPAB    | heterogeneous nuclear ribonucleoprotein A/B                                              | -1.4  | -1.6 | -1.5 | -1.4 | -1.8  |
| HNRPC     | heterogeneous nuclear ribonucleoprotein C (C1/C2)                                        | -1.2  | -1.5 |      |      | -1.9  |
| HNRPD     | heterogeneous nuclear ribonucleoprotein D (AU-rich element RNA binding protein 1, 37kDa) | 3.1   |      |      |      | -1.8  |
| HNRPDL    | heterogeneous nuclear ribonucleoprotein D-like                                           | 1.7   | -1.6 |      |      | -2.4  |
| HNRPF     | heterogeneous nuclear ribonucleoprotein F                                                | 1.3   |      |      |      | -2.5  |
| HNRPH1    | heterogeneous nuclear ribonucleoprotein H1 (H)                                           | -2.9  | 1.3  |      |      | 2.1   |
| HNRPH3    | heterogeneous nuclear ribonucleoprotein H3 (2H9)                                         | -1.4  |      |      |      | -1.3  |
| HNRPL     | heterogeneous nuclear ribonucleoprotein L                                                | -1.4  | -2.0 |      |      | 1.3   |
| HNRPM     | heterogeneous nuclear ribonucleoprotein M                                                | 1.8   | 1.8  |      |      | -2.2  |
| HNRPU     | heterogeneous nuclear ribonucleoprotein U (scaffold attachment factor A)                 | -1.4  | -1.4 |      |      | -2.9  |
| HNRPUL1   | heterogeneous nuclear ribonucleoprotein U-like 1                                         | -1.4  |      |      |      | 3.4   |
| HOMER1    | homer homolog 1 (Drosophila)                                                             | -2.3  |      |      |      |       |
| HOXA9     | homeobox A9                                                                              | -91.3 |      |      |      | 194.0 |
| HRAS      | v-Ha-ras Harvey rat sarcoma viral oncogene homolog                                       | -1.8  |      | -1.3 |      |       |
| HRB       | HIV-1 Rev binding protein                                                                | -1.7  | 1.5  |      |      | 3.8   |
| HRMT1L2   | protein arginine methyltransferase 1                                                     | -1.2  | -2.6 |      | -1.7 | -2.6  |
| HS2ST1    | heparan sulfate 2-O-sulfotransferase 1                                                   | 1.8   |      |      |      | -1.4  |
| HS6ST1    | heparan sulfate 6-O-sulfotransferase 1                                                   | 1.3   | 1.8  |      | 2.2  | 1.5   |
| HSBP1     | heat shock factor binding protein 1                                                      | -1.4  | -1.3 |      |      |       |
| HSD17B4   | hydroxysteroid (17-beta) dehydrogenase 4                                                 | 2.0   | 1.9  |      |      | 2.0   |

|         |                                                                             |       |      |      |      |       |
|---------|-----------------------------------------------------------------------------|-------|------|------|------|-------|
| HSF2    | heat shock transcription factor 2                                           | 1.2   |      |      |      |       |
| HSPA4L  | heat shock 70kDa protein 4-like                                             | 25.8  |      |      |      | -42.0 |
| HSPA5   | heat shock 70kDa protein 5 (glucose-regulated protein, 78kDa)               | 1.6   |      |      | -1.5 | -3.2  |
| HSPB1   | heat shock 27kDa protein 1                                                  | -2.7  | -1.3 |      |      | 1.6   |
| HSPCA   | heat shock protein 90kDa alpha (cytosolic), class A member 1                | -1.2  |      |      | -1.2 |       |
| HSPCB   | heat shock protein 90kDa alpha (cytosolic), class B member 1                | 1.4   | -2.0 | -1.4 | -1.3 | -1.8  |
| HTATSF1 | HIV-1 Tat specific factor 1                                                 | 1.4   |      |      |      | -2.0  |
| HTR7    | 5-hydroxytryptamine (serotonin) receptor 7 (adenylate cyclase-coupled)      | -1.4  |      |      |      |       |
| HUWE1   | HECT, UBA and WWE domain containing 1                                       | 1.4   |      |      |      | -1.3  |
| HYOU1   | hypoxia up-regulated 1                                                      | 1.8   | -1.7 |      |      | -2.3  |
| IARS    | isoleucine-tRNA synthetase                                                  | -1.4  | -2.2 | -1.6 |      | -3.8  |
| IARS2   | isoleucine-tRNA synthetase 2, mitochondrial                                 | 1.4   | -1.2 |      |      | -1.4  |
| IBRDC3  | IBR domain containing 3                                                     | -2.0  |      |      |      | 2.3   |
| IBTK    | inhibitor of Bruton agammaglobulinemia tyrosine kinase                      | 1.5   | 1.6  |      |      | -1.4  |
| ICAM2   | intercellular adhesion molecule 2                                           | -17.5 | -2.4 | -1.8 | -1.7 | 3.3   |
| ID2     | inhibitor of DNA binding 2, dominant negative helix-loop-helix protein      | 5.8   | 3.0  | 1.8  |      | 3.3   |
| ID3     | inhibitor of DNA binding 3, dominant negative helix-loop-helix protein      | -33.8 | -1.9 |      |      |       |
| IDE     | insulin-degrading enzyme                                                    | 1.4   |      |      |      | -1.7  |
| IDH1    | isocitrate dehydrogenase 1 (NADP+), soluble                                 | -1.3  | -1.6 |      |      | 1.8   |
| IDH2    | isocitrate dehydrogenase 2 (NADP+), mitochondrial                           | -1.4  | -1.4 |      |      | -2.3  |
| IDH3A   | isocitrate dehydrogenase 3 (NAD+) alpha                                     | -1.6  | -1.7 | -1.5 | -1.5 | -2.4  |
| IDH3B   | isocitrate dehydrogenase 3 (NAD+) beta                                      | 1.5   |      |      |      | -2.1  |
| IDI1    | isopentenyl-diphosphate delta isomerase 1                                   | 1.5   | 1.7  |      |      | 2.1   |
| IDS     | iduronate 2-sulfatase (Hunter syndrome)                                     | -1.6  |      |      |      | 1.5   |
| IER2    | immediate early response 2                                                  | 1.6   |      |      | -1.4 | -2.7  |
| IFI16   | interferon, gamma-inducible protein 16                                      | 2.0   | 2.4  | -1.3 |      | -1.3  |
| IFITM1  | interferon induced transmembrane protein 1 (9-27)                           | 4.6   | 3.2  |      |      | -14.3 |
| IFITM2  | interferon induced transmembrane protein 2 (1-8D)                           | -3.1  | 2.2  |      |      | 1.6   |
| IFNAR2  | interferon (alpha, beta and omega) receptor 2                               | -2.9  |      |      |      |       |
| IFNGR1  | interferon gamma receptor 1                                                 | 5.7   | 3.3  | 1.7  |      | 2.6   |
| IGF2R   | insulin-like growth factor 2 receptor                                       | 1.3   | 1.7  |      |      | 1.7   |
| IGHG1   | immunoglobulin heavy constant gamma 1 (G1m marker)                          | -2.6  | 1.3  |      |      | 3.7   |
| IGLL1   | immunoglobulin lambda-like polypeptide 1                                    | -44.6 | -1.2 | -1.4 |      | 9.6   |
| IHPK1   | inositol hexaphosphate kinase 1                                             | 1.8   | -1.4 |      |      | -1.7  |
| IKBKG   | inhibitor of kappa light polypeptide gene enhancer in B-cells, kinase gamma | -1.5  |      |      |      | 1.6   |
| IL27RA  | interleukin 27 receptor, alpha                                              | 20.9  |      |      |      | -7.5  |
| IL2RG   | interleukin 2 receptor, gamma (severe combined immunodeficiency)            | -1.4  | -1.4 |      |      |       |
| IL7R    | interleukin 7 receptor                                                      | -56.6 | -3.1 | 8.3  | 6.3  | 43.1  |
| ILF3    | interleukin enhancer binding factor 3, 90kDa                                | 1.7   | -2.2 | -1.3 |      | -4.0  |
| ILK     | integrin-linked kinase                                                      | 1.4   |      | 1.3  |      |       |
| IMMT    | inner membrane protein, mitochondrial (mitofilin)                           | 1.4   |      |      |      | -1.6  |
| IMPA1   | inositol(myo)-1(or 4)-monophosphatase 1                                     | -1.7  | 1.2  |      |      | 2.3   |

|          |                                                                                              |      |       |      |      |        |
|----------|----------------------------------------------------------------------------------------------|------|-------|------|------|--------|
| IMPA2    | inositol(myo)-1(or 4)-monophosphatase 2                                                      | 1.8  | -12.4 |      |      | -7.9   |
| IMPDH1   | IMP (inosine monophosphate) dehydrogenase 1                                                  | -2.0 |       | -1.6 | -1.4 |        |
| IMPDH2   | IMP (inosine monophosphate) dehydrogenase 2                                                  | 1.3  | -1.4  |      | -1.5 | -1.5   |
| ING3     | inhibitor of growth family, member 3                                                         | -1.9 | 1.3   |      |      | 3.0    |
| INPP1    | inositol polyphosphate-1-phosphatase                                                         | 1.4  | 2.7   | 3.5  | 17.6 | 13.6   |
| INPP5D   | inositol polyphosphate-5-phosphatase, 145kDa                                                 | -1.6 | 2.0   |      |      | 1.5    |
| INSIG1   | insulin induced gene 1                                                                       | -5.5 | 1.7   |      |      | 3.7    |
| IPO7     | importin 7                                                                                   | 1.5  | -1.7  | -1.4 |      | -4.6   |
| IQCB1    | IQ motif containing B1                                                                       | -1.3 |       |      | -1.5 | -1.5   |
| IQGAP1   | IQ motif containing GTPase activating protein 1                                              | -2.4 | 2.2   |      |      | 4.4    |
| IRAK1    | interleukin-1 receptor-associated kinase 1                                                   | -1.3 |       |      |      |        |
| IRAK1BP1 | interleukin-1 receptor-associated kinase 1 binding protein 1                                 | -1.6 | -3.0  |      |      | 1.6    |
| IREB2    | iron-responsive element binding protein 2                                                    | 1.5  |       |      |      | -1.9   |
| IRF2     | interferon regulatory factor 2                                                               | -2.3 |       |      |      | 2.2    |
| IRF3     | interferon regulatory factor 3                                                               | -1.2 |       |      |      |        |
| IRS1     | insulin receptor substrate 1                                                                 | -4.8 | 1.5   |      |      | 7.7    |
| ITCH     | itchy homolog E3 ubiquitin protein ligase (mouse)                                            | 2.0  | 1.8   |      |      | 1.6    |
| ITGA6    | integrin, alpha 6                                                                            | 6.1  | 7.2   | 5.0  | 2.4  | -1.9   |
| ITGAE    | integrin, alpha E (antigen CD103, human mucosal lymphocyte antigen 1; alpha polypeptide)     | -2.9 | 1.5   |      |      | 3.1    |
| ITGB1    | integrin, beta 1 (fibronectin receptor, beta polypeptide, antigen CD29 includes MDF2, MSK12) | 3.1  | 1.4   |      |      | -2.1   |
| ITGB1BP1 | integrin beta 1 binding protein 1                                                            | -1.2 |       |      |      |        |
| ITGB2    | integrin, beta 2 (complement component 3 receptor 3 and 4 subunit)                           | 2.6  | -5.6  |      |      | -8.7   |
| ITM2A    | integral membrane protein 2A                                                                 | 64.4 |       |      |      | -138.3 |
| ITM2B    | integral membrane protein 2B                                                                 | 1.7  | 2.0   |      |      | 1.9    |
| ITPKB    | inositol 1,4,5-trisphosphate 3-kinase B                                                      | -4.6 |       |      |      | 1.7    |
| ITPR1    | inositol 1,4,5-trisphosphate receptor, type 1                                                | 3.8  | 2.4   |      |      | -18.1  |
| ITPR2    | inositol 1,4,5-trisphosphate receptor, type 2                                                | 4.3  | 1.8   | 1.5  | 1.5  | -2.4   |
| ITSN1    | intersectin 1 (SH3 domain protein)                                                           | -3.8 | -1.3  |      |      | 8.7    |
| IVNS1ABP | influenza virus NS1A binding protein                                                         | -1.3 | -1.3  |      |      | -1.9   |
| JAK1     | Janus kinase 1 (a protein tyrosine kinase)                                                   | 1.9  | 1.8   | 2.2  | 2.6  | 3.4    |
| JAM3     | junctional adhesion molecule 3                                                               | 12.9 |       | 2.4  | 3.6  | -12.3  |
| JARID1A  | jumonji, AT rich interactive domain 1A                                                       | -2.3 | 1.2   |      |      | 3.7    |
| JARID1B  | jumonji, AT rich interactive domain 1B                                                       | 37.6 |       |      |      | -8.0   |
| JARID2   | jumonji, AT rich interactive domain 2                                                        | -1.4 |       | -1.3 |      | 1.9    |
| JMJD1A   | jumonji domain containing 1A                                                                 | 1.6  |       |      |      |        |
| JMJD1C   | jumonji domain containing 1C                                                                 | -2.0 | 1.9   |      |      | 3.6    |
| JRK      | jerky homolog (mouse)                                                                        | 2.1  |       |      |      | -1.8   |
| JUN      | jun oncogene                                                                                 | 42.1 | 18.9  | 4.4  |      | -6.2   |
| JUND     | jun D proto-oncogene                                                                         | 1.3  | 1.8   |      |      | 1.4    |
| KAB      | centrosomal protein 170kDa                                                                   | 3.8  | 1.2   |      |      | -4.0   |
| KATNB1   | katanin p80 (WD repeat containing) subunit B 1                                               | -1.4 | -2.1  |      |      |        |
| KCNN4    | potassium intermediate/small conductance calcium-activated channel, subfamily N, member 4    | 23.1 | -13.3 |      |      | -19.5  |



|          |                                                                                   |        |      |      |      |       |
|----------|-----------------------------------------------------------------------------------|--------|------|------|------|-------|
| LAPTM5   | lysosomal associated multispinning membrane protein 5                             | -4.3   | 2.0  |      |      | 10.9  |
| LARS2    | leucyl-tRNA synthetase 2, mitochondrial                                           | -1.2   | -1.5 |      |      | -1.4  |
| LASP1    | LIM and SH3 protein 1                                                             | 1.6    |      |      |      |       |
| LCK      | lymphocyte-specific protein tyrosine kinase                                       | -49.3  |      |      | -1.7 | 18.5  |
| LCP1     | lymphocyte cytosolic protein 1 (L-plastin)                                        | -4.1   | -2.5 |      |      | 7.2   |
| LCP2     | lymphocyte cytosolic protein 2 (SH2 domain containing leukocyte protein of 76kDa) | 1.6    | -2.4 |      |      | -2.2  |
| LDB1     | LIM domain binding 1                                                              | 1.7    | -1.2 |      |      | -1.5  |
| LDLR     | low density lipoprotein receptor (familial hypercholesterolemia)                  | -3.6   | -1.3 |      |      | 3.0   |
| LEF1     | lymphoid enhancer-binding factor 1                                                | -288.8 | -1.3 | 1.5  |      | 826.7 |
| LEPR     | leptin receptor                                                                   | 1.8    | 2.2  |      |      | 4.6   |
| LETMD1   | LETM1 domain containing 1                                                         | 3.1    |      |      |      | -7.5  |
| LGALS1   | lectin, galactoside-binding, soluble, 1 (galectin 1)                              | -22.2  | 2.9  |      |      | 82.1  |
| LGALS3BP | lectin, galactoside-binding, soluble, 3 binding protein                           | -4.3   | -2.3 |      |      | 2.8   |
| LIG4     | ligase IV, DNA, ATP-dependent                                                     | 1.9    | 1.8  |      |      |       |
| LIMS1    | LIM and senescent cell antigen-like domains 1                                     | 1.3    | 1.3  |      |      | 3.7   |
| LIPA     | lipase A, lysosomal acid, cholesterol esterase (Wolman disease)                   | 1.2    | -2.0 |      |      |       |
| LMAN1    | lectin, mannose-binding, 1                                                        | 1.6    |      | -1.5 |      | -15.2 |
| LMNB1    | lamin B1                                                                          | -2.0   |      |      |      |       |
| LMO2     | LIM domain only 2 (rhombotin-like 1)                                              | 7.9    | 4.4  |      |      | -6.9  |
| LNK      | SH2B adaptor protein 3                                                            | 1.3    | -1.2 |      |      | -2.8  |
| LOC51035 | unknown protein LOC51035                                                          | 1.3    |      |      | 1.5  |       |
| LOC93081 | chromosome 13 open reading frame 27                                               | 2.0    |      |      |      | -1.4  |
| LPIN1    | lipin 1                                                                           | -1.6   |      | 1.3  |      | 2.3   |
| LPXN     | leupaxin                                                                          | -3.2   | -1.7 |      |      | 1.7   |
| LRBA     | LPS-responsive vesicle trafficking, beach and anchor containing                   | 1.4    | -2.1 |      |      | -1.6  |
| LRCH4    | leucine-rich repeats and calponin homology (CH) domain containing 4               | -1.9   | 1.9  |      |      | 4.1   |
| LRMP     | lymphoid-restricted membrane protein                                              | -18.6  | -1.4 |      |      | 7.8   |
| LRP8     | low density lipoprotein receptor-related protein 8, apolipoprotein e receptor     | -1.6   | -2.1 | -2.2 | -2.8 | -2.5  |
| LRPAP1   | low density lipoprotein receptor-related protein associated protein 1             | 3.2    |      |      |      | -2.1  |
| LRPPRC   | leucine-rich PPR-motif containing                                                 | 1.7    | -5.1 | -1.8 | -1.7 | -2.8  |
| LRRFIP1  | leucine rich repeat (in FLII) interacting protein 1                               | -6.0   | 2.5  |      |      | 11.3  |
| LSM1     | LSM1 homolog, U6 small nuclear RNA associated (S. cerevisiae)                     | 2.2    |      |      |      |       |
| LSM4     | LSM4 homolog, U6 small nuclear RNA associated (S. cerevisiae)                     | -1.6   | -1.4 |      |      | -1.9  |
| LSM5     | LSM5 homolog, U6 small nuclear RNA associated (S. cerevisiae)                     | 2.9    |      |      |      | -4.5  |
| LSM7     | LSM7 homolog, U6 small nuclear RNA associated (S. cerevisiae)                     | -1.5   | -1.5 |      |      | -1.4  |
| LTA4H    | leukotriene A4 hydrolase                                                          | 2.6    |      |      |      | -2.9  |
| LTK      | leukocyte tyrosine kinase                                                         | -2.3   |      |      |      | 2.4   |
| LY6E     | lymphocyte antigen 6 complex, locus E                                             | 2.0    |      |      |      | -12.6 |
| LYL1     | lymphoblastic leukemia derived sequence 1                                         | 3.5    |      |      | 1.4  | -6.7  |
| LYPLA1   | lysophospholipase I                                                               | -1.3   | 1.3  |      |      | 1.2   |
| M11S1    | GPI-anchored membrane protein 1                                                   | -2.0   | -1.3 |      |      | -1.5  |
| MAC30    | transmembrane protein 97                                                          | 1.4    | -3.0 | -1.3 |      | -3.2  |

|           |                                                                          |       |      |      |      |       |
|-----------|--------------------------------------------------------------------------|-------|------|------|------|-------|
| MACF1     | microtubule-actin crosslinking factor 1                                  | -1.5  | -1.3 |      |      | 2.7   |
| MAD2L1    | MAD2 mitotic arrest deficient-like 1 (yeast)                             | -2.0  |      |      |      |       |
| MAG       | myelin associated glycoprotein                                           | -40.4 | -2.3 |      |      | 2.0   |
| MAGED1    | melanoma antigen family D, 1                                             | 2.4   | -2.1 |      |      | -4.1  |
| MAGOH     | mago-nashi homolog, proliferation-associated (Drosophila)                | -1.2  |      |      |      | -1.5  |
| MALT1     | mucosa associated lymphoid tissue lymphoma translocation gene 1          | -1.7  | -1.7 |      |      | 2.2   |
| MAN2A1    | mannosidase, alpha, class 2A, member 1                                   | 2.5   | 1.7  |      |      | -1.9  |
| MAN2A2    | mannosidase, alpha, class 2A, member 2                                   | 8.4   | 1.3  |      |      | -4.8  |
| MAN2B1    | mannosidase, alpha, class 2B, member 1                                   | 2.4   |      |      |      | -2.9  |
| MAP2K1    | mitogen-activated protein kinase kinase 1                                | 1.5   | 1.9  | 1.5  | 1.7  | 2.1   |
| MAP2K2    | mitogen-activated protein kinase kinase 2                                | 1.3   |      |      |      | -1.6  |
| MAP2K3    | mitogen-activated protein kinase kinase 3                                | -2.3  |      |      |      | 1.9   |
| MAP2K4    | mitogen-activated protein kinase kinase 4                                | -1.4  |      |      |      | 1.7   |
| MAP2K6    | mitogen-activated protein kinase kinase 6                                | -2.5  |      |      |      |       |
| MAP3K11   | mitogen-activated protein kinase kinase kinase 11                        | 1.3   |      |      |      | -1.7  |
| MAP3K7    | mitogen-activated protein kinase kinase kinase 7                         | 1.3   |      |      |      |       |
| MAP3K7IP2 | mitogen-activated protein kinase kinase kinase 7 interacting protein 2   | -1.4  | 1.5  |      |      | 2.1   |
| MAP4K1    | mitogen-activated protein kinase kinase kinase kinase 1                  | -2.6  | -2.7 |      |      | 2.4   |
| MAP4K4    | mitogen-activated protein kinase kinase kinase kinase 4                  | -1.5  | 1.7  |      |      | 1.7   |
| MAP4K5    | mitogen-activated protein kinase kinase kinase kinase 5                  | 1.9   | 2.2  |      |      |       |
| MAPK1     | mitogen-activated protein kinase 1                                       | -1.4  | 2.3  |      |      | 2.0   |
| MAPK14    | mitogen-activated protein kinase 14                                      | 4.1   |      |      | 1.4  | -2.1  |
| MAPKAPK3  | mitogen-activated protein kinase-activated protein kinase 3              | 10.5  | -1.5 | -1.4 |      | -20.4 |
| MAPKAPK5  | mitogen-activated protein kinase-activated protein kinase 5              | -1.6  |      |      |      |       |
| MAPRE1    | microtubule-associated protein, RP/EB family, member 1                   | -1.4  | 1.5  |      |      | 1.6   |
| MAPRE2    | microtubule-associated protein, RP/EB family, member 2                   | -3.4  | -2.5 |      |      | 3.0   |
| MARCH7    | membrane-associated ring finger (C3HC4) 7                                | 2.3   | 2.1  |      |      |       |
| MARCKSL1  | MARCKS-like 1                                                            | -1.6  | -1.4 |      | -1.6 |       |
| MARK3     | MAP/microtubule affinity-regulating kinase 3                             | 1.5   |      |      |      |       |
| MARS      | methionine-tRNA synthetase                                               | -1.5  | -2.2 |      |      | -2.2  |
| MAX       | MYC associated factor X                                                  | -1.2  | -1.7 |      |      |       |
| MAZ       | MYC-associated zinc finger protein (purine-binding transcription factor) | -3.2  | -1.7 |      |      | 1.7   |
| MBD1      | methyl-CpG binding domain protein 1                                      | 1.3   |      |      |      | -1.8  |
| MBD2      | methyl-CpG binding domain protein 2                                      | -1.6  |      |      |      | 1.3   |
| MBD3      | methyl-CpG binding domain protein 3                                      | -1.6  | -1.4 |      |      |       |
| MBD4      | methyl-CpG binding domain protein 4                                      | 1.7   |      |      |      | -2.2  |
| MBNL1     | muscleblind-like (Drosophila)                                            | -4.4  | 2.0  |      |      | 9.2   |
| MCCC2     | methylcrotonoyl-Coenzyme A carboxylase 2 (beta)                          | 1.4   | -1.5 |      |      | -2.1  |
| MCFD2     | multiple coagulation factor deficiency 2                                 | 1.6   |      |      |      | -1.7  |
| MCL1      | myeloid cell leukemia sequence 1 (BCL2-related)                          | 1.4   | 1.7  | 1.2  |      | 1.3   |
| MCM3      | MCM3 minichromosome maintenance deficient 3 (S. cerevisiae)              | -1.4  | -3.1 |      | -1.3 | -4.2  |
| MCM4      | MCM4 minichromosome maintenance deficient 4 (S. cerevisiae)              | -2.1  | -3.3 |      |      | -6.9  |

|          |                                                                                                         |      |      |      |      |      |
|----------|---------------------------------------------------------------------------------------------------------|------|------|------|------|------|
| MCM5     | MCM5 minichromosome maintenance deficient 5, cell division cycle 46 ( <i>S. cerevisiae</i> )            | -1.5 | -1.5 |      |      | -3.2 |
| MCM6     | minichromosome maintenance deficient 6 homolog ( <i>S. cerevisiae</i> )                                 | 1.3  | -2.1 |      |      | -6.8 |
| MCM7     | MCM7 minichromosome maintenance deficient 7 ( <i>S. cerevisiae</i> )                                    | -1.9 | -1.3 |      |      | -2.7 |
| MCP      | CD46 molecule, complement regulatory protein                                                            | 1.6  | 1.4  |      |      |      |
| MCRS1    | microspherule protein 1                                                                                 | -1.7 |      |      |      |      |
| MDC1     | mediator of DNA damage checkpoint 1                                                                     | -4.7 |      |      |      | 2.0  |
| MDH1     | malate dehydrogenase 1, NAD (soluble)                                                                   | 1.9  | -1.3 |      |      | -2.2 |
| MDH2     | malate dehydrogenase 2, NAD (mitochondrial)                                                             | -2.3 | -1.5 |      |      | 3.7  |
| MDM4     | Mdm4, transformed 3T3 cell double minute 4, p53 binding protein (mouse)                                 | -2.4 | 2.2  |      |      | 2.5  |
| MED12    | mediator of RNA polymerase II transcription, subunit 12 homolog ( <i>S. cerevisiae</i> )                | 1.4  |      |      |      |      |
| MED6     | mediator of RNA polymerase II transcription, subunit 6 homolog ( <i>S. cerevisiae</i> )                 | -1.4 |      |      |      |      |
| MED8     | mediator of RNA polymerase II transcription, subunit 8 homolog ( <i>S. cerevisiae</i> )                 | 1.7  |      |      |      |      |
| MEF2A    | MADS box transcription enhancer factor 2, polypeptide A (myocyte enhancer factor 2A)                    | -3.6 | 1.7  |      |      | 11.0 |
| MEF2D    | MADS box transcription enhancer factor 2, polypeptide D (myocyte enhancer factor 2D)                    | -5.7 |      |      |      | 2.0  |
| MEIS2    | Meis1, myeloid ecotropic viral integration site 1 homolog 2 (mouse)                                     | 3.6  | -2.1 |      |      | -4.4 |
| MELK     | maternal embryonic leucine zipper kinase                                                                | -1.3 | 1.4  | 1.4  |      |      |
| MEN1     | multiple endocrine neoplasia I                                                                          | 1.3  | -1.5 |      |      | -1.3 |
| MEP50    | WD repeat domain 77                                                                                     | -1.8 | -1.5 | -1.7 |      | -1.4 |
| MFAP1    | microfibrillar-associated protein 1                                                                     | -1.6 | -1.4 |      |      |      |
| MFNG     | MFNG O-fucosylpeptide 3-beta-N-acetylglucosaminyltransferase                                            | 3.0  | -1.8 |      |      | -9.2 |
| MGA      | MAX gene associated                                                                                     | 3.0  | -1.8 |      |      | -7.2 |
| MGC17330 | HGFL gene                                                                                               | 34.8 | 7.3  | 7.3  | 5.5  | 12.3 |
| MGC5508  | transmembrane protein 109                                                                               | -1.4 | -1.7 | -1.4 | -1.6 | -1.5 |
| MGEA5    | meningioma expressed antigen 5 (hyaluronidase)                                                          | 1.7  | 1.3  |      |      | 1.9  |
| MICB     | MHC class I polypeptide-related sequence B                                                              | -1.4 |      |      |      |      |
| MINA     | MYC induced nuclear antigen                                                                             | -1.2 | -1.7 |      |      | -1.9 |
| MINPP1   | multiple inositol polyphosphate histidine phosphatase, 1                                                | 1.6  |      |      |      | -1.7 |
| MIR16    | membrane interacting protein of RGS16                                                                   | 2.1  | -1.4 |      |      | -2.9 |
| MKI67    | antigen identified by monoclonal antibody Ki-67                                                         | -2.2 | 2.1  |      |      | 2.2  |
| MKL1     | megakaryoblastic leukemia (translocation) 1                                                             | 1.5  | -1.5 |      |      | -1.6 |
| MKNK1    | MAP kinase interacting serine/threonine kinase 1                                                        | 1.3  |      |      | 1.9  | 1.3  |
| MKRN1    | makorin, ring finger protein, 1                                                                         | -1.5 |      |      |      | 2.1  |
| MLC1     | megalencephalic leukoencephalopathy with subcortical cysts 1                                            | 1.7  |      |      | -1.5 | -5.1 |
| MLH3     | mutL homolog 3 ( <i>E. coli</i> )                                                                       | 2.2  | -1.3 |      |      | -2.4 |
| MLL      | myeloid/lymphoid or mixed-lineage leukemia (trithorax homolog, <i>Drosophila</i> )                      | 1.8  | -1.8 |      |      | 2.0  |
| MLLT10   | myeloid/lymphoid or mixed-lineage leukemia (trithorax homolog, <i>Drosophila</i> ); translocated to, 10 | 2.7  |      |      |      | -2.2 |
| MMS19L   | MMS19-like (MET18 homolog, <i>S. cerevisiae</i> )                                                       | 1.7  |      |      | -1.3 | -1.4 |
| MNT      | MAX binding protein                                                                                     | -1.5 |      |      |      |      |
| MOBK1B   | MOB1, Mps One Binder kinase activator-like 1B (yeast)                                                   | -1.6 |      |      |      | 1.4  |
| MONDOA   | MLX interacting protein                                                                                 | 1.5  | 1.7  |      |      |      |
| MORF4L2  | mortality factor 4 like 2                                                                               | 1.2  |      |      |      |      |
| MPG      | N-methylpurine-DNA glycosylase                                                                          | -4.1 |      |      |      | 4.1  |

|          |                                                                                                                                          |      |      |      |      |       |
|----------|------------------------------------------------------------------------------------------------------------------------------------------|------|------|------|------|-------|
| MPHOSPH1 | M-phase phosphoprotein 1                                                                                                                 | 1.9  |      |      |      | -3.2  |
| MPHOSPH6 | M-phase phosphoprotein 6                                                                                                                 | -1.3 | -1.9 |      |      | -2.3  |
| MPP1     | membrane protein, palmitoylated 1, 55kDa                                                                                                 | -1.9 | -1.3 |      |      |       |
| MPP6     | membrane protein, palmitoylated 6 (MAGUK p55 subfamily member 6)                                                                         | 38.6 |      |      |      | -21.9 |
| MPZL1    | myelin protein zero-like 1                                                                                                               | -7.5 | -1.8 |      |      | 9.8   |
| MRC2     | mannose receptor, C type 2                                                                                                               | 2.0  |      |      |      | -8.0  |
| MRCL3    | myosin regulatory light chain MRCL3                                                                                                      | -2.0 | 2.2  |      |      | 5.8   |
| M-RIP    | myosin phosphatase-Rho interacting protein                                                                                               | -5.4 | 1.2  |      |      | 26.4  |
| MRPS12   | mitochondrial ribosomal protein S12                                                                                                      | -1.5 |      | -1.4 | -1.7 | -1.7  |
| MSH2     | mutS homolog 2, colon cancer, nonpolyposis type 1 (E. coli)                                                                              | -1.5 | -1.6 |      | -1.5 | -1.8  |
| MSH6     | mutS homolog 6 (E. coli)                                                                                                                 | -2.5 | -2.7 | -1.2 | -1.7 | -2.4  |
| MSN      | moesin                                                                                                                                   | 1.4  | 1.2  |      |      | 1.7   |
| MT1E     | metallothionein 1E (functional)                                                                                                          | 1.8  | 2.3  |      | 2.1  |       |
| MT1H     | metallothionein 1H                                                                                                                       | 1.4  | 3.0  |      | 2.1  | 1.3   |
| MT1X     | metallothionein 1X                                                                                                                       | 1.6  | 1.8  |      |      | 1.7   |
| MT2A     | metallothionein 2A                                                                                                                       | 3.2  | 3.0  |      |      | 1.2   |
| MTA1     | metastasis associated 1                                                                                                                  | 1.4  | -1.4 |      |      | -1.6  |
| MTCP1    | mature T-cell proliferation 1                                                                                                            | -1.4 |      |      |      |       |
| MTHFD1   | methylenetetrahydrofolate dehydrogenase (NADP+ dependent) 1, methylenetetrahydrofolate cyclohydrolase, formyltetrahydrofolate synthetase | 1.5  | -2.2 | -1.4 | -1.5 | -5.0  |
| MTHFS    | 5,10-methylenetetrahydrofolate synthetase (5-formyltetrahydrofolate cyclo-ligase)                                                        | -1.4 |      |      | 1.3  |       |
| MTM1     | myotubularin 1                                                                                                                           | 2.5  |      |      |      | -2.5  |
| MTMR2    | myotubularin related protein 2                                                                                                           | -1.2 | -1.3 |      |      |       |
| MTMR3    | myotubularin related protein 3                                                                                                           | -1.4 | 1.5  |      |      | 1.9   |
| MTMR6    | myotubularin related protein 6                                                                                                           | -1.4 | 1.7  |      |      | 1.5   |
| MTX2     | metaxin 2                                                                                                                                | 1.3  |      |      |      | -2.1  |
| MUT      | methylmalonyl Coenzyme A mutase                                                                                                          | -1.6 |      |      |      | 2.0   |
| MXI1     | MAX interactor 1                                                                                                                         | 6.4  | -1.7 | -2.7 |      | -6.2  |
| MYB      | v-myb myeloblastosis viral oncogene homolog (avian)                                                                                      | 2.2  | 1.8  |      |      | -2.0  |
| MYC      | v-myc myelocytomatosis viral oncogene homolog (avian)                                                                                    | 1.6  | -2.8 | -3.8 | -3.6 | -4.8  |
| MYCBP    | c-myc binding protein                                                                                                                    | 1.3  | -1.2 |      |      | -1.6  |
| MYCBP2   | MYC binding protein 2                                                                                                                    | -1.5 | -1.4 |      |      |       |
| MYH10    | myosin, heavy chain 10, non-muscle                                                                                                       | -3.7 | -1.3 |      |      | 3.8   |
| MYH9     | myosin, heavy chain 9, non-muscle                                                                                                        | -1.8 |      |      | 1.6  | 2.2   |
| MYL6B    | myosin, light chain 6B, alkali, smooth muscle and non-muscle                                                                             | -1.7 |      |      |      |       |
| MYO1B    | myosin IB                                                                                                                                | 3.5  | 2.3  | 11.8 |      | -6.5  |
| MYO5A    | myosin VA (heavy chain 12, myosin)                                                                                                       | -8.2 |      |      |      | 6.2   |
| MYST1    | MYST histone acetyltransferase 1                                                                                                         | -1.9 |      |      |      | 2.3   |
| MYST4    | MYST histone acetyltransferase (monocytic leukemia) 4                                                                                    | 2.2  | -1.9 |      |      | -2.6  |
| NACA     | nascent-polypeptide-associated complex alpha polypeptide                                                                                 | 1.3  |      |      |      | -1.9  |
| NAGA     | N-acetylgalactosaminidase, alpha-                                                                                                        | 1.6  |      |      |      | -2.4  |
| NAP1L1   | nucleosome assembly protein 1-like 1                                                                                                     | 1.9  | -1.2 | -1.3 |      | -2.9  |
| NAP1L4   | nucleosome assembly protein 1-like 4                                                                                                     | -1.5 |      |      |      | -1.3  |

|          |                                                                                               |      |      |      |      |      |
|----------|-----------------------------------------------------------------------------------------------|------|------|------|------|------|
| NAPA     | N-ethylmaleimide-sensitive factor attachment protein, alpha                                   | -1.5 |      |      |      |      |
| NAT1     | N-acetyltransferase 1 (arylamine N-acetyltransferase)                                         | 1.2  | 1.3  |      |      |      |
| NBL1     | neuroblastoma, suppression of tumorigenicity 1                                                | 2.3  |      |      |      | -3.0 |
| NBR1     | neighbor of BRCA1 gene 1                                                                      | 2.6  | 1.5  |      |      | -1.2 |
| NBS1     | nibrin                                                                                        | -1.6 | -1.2 | 1.9  | 1.7  | 1.8  |
| NCBP1    | nuclear cap binding protein subunit 1, 80kDa                                                  | -1.3 | -1.2 |      |      |      |
| NCF4     | neutrophil cytosolic factor 4, 40kDa                                                          | -1.9 | -1.5 |      |      | 1.6  |
| NCK1     | NCK adaptor protein 1                                                                         | 1.7  | 1.5  | 1.4  | 2.3  |      |
| NCKAP1   | NCK-associated protein 1                                                                      | 6.0  |      |      |      | -5.9 |
| NCKAP1L  | NCK-associated protein 1-like                                                                 | 1.3  |      | 1.4  |      |      |
| NCL      | nucleolin                                                                                     | -1.6 | -1.9 | -1.3 |      | -1.2 |
| NCOA3    | nuclear receptor coactivator 3                                                                | -1.4 | 2.1  |      |      | 3.8  |
| NCOA4    | nuclear receptor coactivator 4                                                                | 1.9  | 1.3  | 1.5  |      | -1.4 |
| NCSTN    | nicastrin                                                                                     | 1.9  |      |      |      |      |
| NDRG1    | N-myc downstream regulated gene 1                                                             | 9.2  | 3.1  | 1.6  |      | 2.3  |
| NDUFA5   | NADH dehydrogenase (ubiquinone) 1 alpha subcomplex, 5, 13kDa                                  | -2.4 |      |      |      | 1.9  |
| NDUFA9   | NADH dehydrogenase (ubiquinone) 1 alpha subcomplex, 9, 39kDa                                  | -2.1 |      |      |      |      |
| NDUFAB1  | NADH dehydrogenase (ubiquinone) 1, alpha/beta subcomplex, 1, 8kDa                             | -1.9 | -1.5 |      |      |      |
| NDUFAF1  | NADH dehydrogenase (ubiquinone) 1 alpha subcomplex, assembly factor 1                         | -3.0 | -1.8 |      | -1.2 | 2.5  |
| NDUFB3   | NADH dehydrogenase (ubiquinone) 1 beta subcomplex, 3, 12kDa                                   | 1.2  |      |      |      | -1.8 |
| NDUFB5   | NADH dehydrogenase (ubiquinone) 1 beta subcomplex, 5, 16kDa                                   | 1.7  |      |      |      | -1.8 |
| NDUFB7   | NADH dehydrogenase (ubiquinone) 1 beta subcomplex, 7, 18kDa                                   | -1.3 | 1.9  |      |      |      |
| NDUFB8   | NADH dehydrogenase (ubiquinone) 1 beta subcomplex, 8, 19kDa                                   | 1.2  |      |      |      | -2.1 |
| NDUFC1   | NADH dehydrogenase (ubiquinone) 1, subcomplex unknown, 1, 6kDa                                | 1.4  |      |      |      | -2.0 |
| NDUFS1   | NADH dehydrogenase (ubiquinone) Fe-S protein 1, 75kDa (NADH-coenzyme Q reductase)             | -1.6 | -1.5 |      |      | 1.4  |
| NDUFS2   | NADH dehydrogenase (ubiquinone) Fe-S protein 2, 49kDa (NADH-coenzyme Q reductase)             | 1.9  |      |      |      | -1.7 |
| NDUFS5   | NADH dehydrogenase (ubiquinone) Fe-S protein 5, 15kDa (NADH-coenzyme Q reductase)             | -1.9 | -1.5 |      |      |      |
| NDUFS6   | NADH dehydrogenase (ubiquinone) Fe-S protein 6, 13kDa (NADH-coenzyme Q reductase)             | -1.5 |      |      |      | -1.8 |
| NDUFV1   | NADH dehydrogenase (ubiquinone) flavoprotein 1, 51kDa                                         | -1.6 | -1.4 |      |      | -2.0 |
| NECAP1   | NECAP endocytosis associated 1                                                                | -1.3 | -1.3 |      |      | 1.6  |
| NEDD4    | neural precursor cell expressed, developmentally down-regulated 4                             | 2.8  |      |      |      | -3.0 |
| NEK1     | NIMA (never in mitosis gene a)-related kinase 1                                               | -1.5 | -2.4 |      |      |      |
| NEK2     | NIMA (never in mitosis gene a)-related kinase 2                                               | -1.9 | 1.5  |      |      | 2.1  |
| NF2      | neurofibromin 2 (bilateral acoustic neuroma)                                                  | -1.3 |      |      |      |      |
| NFATC2IP | nuclear factor of activated T-cells, cytoplasmic, calcineurin-dependent 2 interacting protein | -2.4 | -1.3 |      |      |      |
| NFATC3   | nuclear factor of activated T-cells, cytoplasmic, calcineurin-dependent 3                     | -1.8 | -1.4 | -1.4 | -1.9 |      |
| NFE2L1   | nuclear factor (erythroid-derived 2)-like 1                                                   | 1.6  |      |      | -1.4 | -1.5 |
| NFE2L2   | nuclear factor (erythroid-derived 2)-like 2                                                   | 2.2  | 1.3  |      |      | -2.1 |
| NFIC     | nuclear factor I/C (CCAAT-binding transcription factor)                                       | 5.9  | -1.9 |      |      | -8.4 |
| NFIL3    | nuclear factor, interleukin 3 regulated                                                       | -2.5 | 5.0  | 6.0  | 3.6  | 19.1 |
| NFKB2    | nuclear factor of kappa light polypeptide gene enhancer in B-cells 2 (p49/p100)               | -1.5 |      |      |      | 1.7  |
| NFKBIA   | nuclear factor of kappa light polypeptide gene enhancer in B-cells inhibitor, alpha           | 1.9  | 2.5  | 3.0  | 2.8  | 5.5  |

|        |                                                                              |      |      |      |      |      |
|--------|------------------------------------------------------------------------------|------|------|------|------|------|
| NFRKB  | nuclear factor related to kappaB binding protein                             | 2.2  |      |      |      | -6.3 |
| NFYA   | nuclear transcription factor Y, alpha                                        | 1.6  |      |      |      | -1.9 |
| NFYB   | nuclear transcription factor Y, beta                                         | -1.6 |      |      |      | 1.3  |
| NFYC   | nuclear transcription factor Y, gamma                                        | -1.4 | -1.3 |      |      |      |
| NKTR   | natural killer-tumor recognition sequence                                    | 2.0  |      |      |      |      |
| NMB    | neuromedin B                                                                 | 1.4  |      |      |      | -2.0 |
| NME6   | non-metastatic cells 6, protein expressed in (nucleoside-diphosphate kinase) | 1.6  |      |      |      | -1.6 |
| NMI    | N-myc (and STAT) interactor                                                  | 1.2  |      |      |      | -1.8 |
| NNT    | nicotinamide nucleotide transhydrogenase                                     | 1.3  |      |      |      | -1.3 |
| NOLA2  | nucleolar protein family A, member 2 (H/ACA small nucleolar RNPs)            | -1.5 | -1.8 |      |      | -2.0 |
| NOLC1  | nucleolar and coiled-body phosphoprotein 1                                   | 1.5  | -2.0 | -2.1 |      | -3.9 |
| NPC2   | Niemann-Pick disease, type C2                                                | 1.8  |      | 1.3  |      |      |
| NPM1   | nucleophosmin (nucleolar phosphoprotein B23, numatrin)                       | 1.2  | -1.9 |      |      | -2.6 |
| NPM3   | nucleophosmin/nucleoplasmin, 3                                               | 2.5  |      | -1.4 |      | -4.8 |
| NQO2   | NAD(P)H dehydrogenase, quinone 2                                             | 2.2  | -1.5 |      |      | -3.4 |
| NR2C1  | nuclear receptor subfamily 2, group C, member 1                              | 1.6  | 1.3  |      |      |      |
| NR3C1  | nuclear receptor subfamily 3, group C, member 1 (glucocorticoid receptor)    | -1.8 | 3.1  | 4.2  | 2.1  | 6.5  |
| NRAS   | neuroblastoma RAS viral (v-ras) oncogene homolog                             | -1.4 |      |      |      | 1.8  |
| NRD1   | nardilysin (N-arginine dibasic convertase)                                   | 1.7  |      |      |      | -1.6 |
| NRIP1  | nuclear receptor interacting protein 1                                       | -1.4 | 1.5  |      |      |      |
| NSF    | N-ethylmaleimide-sensitive factor                                            | 1.4  | -1.3 |      |      | -1.8 |
| NSFL1C | NSFL1 (p97) cofactor (p47)                                                   | 1.5  | 1.5  |      |      | -2.2 |
| NSMAF  | neutral sphingomyelinase (N-SMase) activation associated factor              | -1.3 | -2.7 |      |      |      |
| NSUN5C | NOL1/NOP2/Sun domain family, member 5C                                       | -1.7 |      |      |      | 1.2  |
| NT5C2  | 5'-nucleotidase, cytosolic II                                                | 2.3  | 1.5  |      |      | -1.5 |
| NTHL1  | nth endonuclease III-like 1 (E. coli)                                        | -2.2 | -1.7 | -1.7 |      |      |
| NUBP1  | nucleotide binding protein 1 (MinD homolog, E. coli)                         | -1.9 |      |      |      |      |
| NUCB2  | nucleobindin 2                                                               | 1.3  | -1.3 |      |      | -3.1 |
| NUDC   | nuclear distribution gene C homolog (A. nidulans)                            | -1.2 | -1.5 |      |      | -2.1 |
| NUDT1  | nudix (nucleoside diphosphate linked moiety X)-type motif 1                  | -2.3 |      |      |      | 1.8  |
| NUDT3  | nudix (nucleoside diphosphate linked moiety X)-type motif 3                  | 1.9  | -1.2 |      |      | -3.0 |
| NUFIP1 | nuclear fragile X mental retardation protein interacting protein 1           | -1.8 | -1.8 |      |      | -2.2 |
| NUMA1  | nuclear mitotic apparatus protein 1                                          | -2.1 |      |      |      | 1.9  |
| NUP153 | nucleoporin 153kDa                                                           | -2.0 | -1.4 | -1.5 |      | 1.4  |
| NUP155 | nucleoporin 155kDa                                                           | -1.5 |      |      |      | -2.3 |
| NUP205 | nucleoporin 205kDa                                                           | -1.2 | -1.5 |      |      | -1.3 |
| NUP210 | nucleoporin 210kDa                                                           | -3.4 | -1.7 |      |      | -1.5 |
| NUP50  | nucleoporin 50kDa                                                            | -1.3 |      |      |      |      |
| NUP62  | nucleoporin 62kDa                                                            | -1.4 |      | -1.4 |      | -2.6 |
| NUP88  | nucleoporin 88kDa                                                            | -2.2 |      |      |      |      |
| NUP98  | nucleoporin 98kDa                                                            | -1.7 | -2.0 |      | -1.3 | 1.4  |
| NUPL1  | nucleoporin like 1                                                           | -2.9 |      |      |      |      |

|          |                                                                                                                          |        |      |      |  |      |  |      |  |       |
|----------|--------------------------------------------------------------------------------------------------------------------------|--------|------|------|--|------|--|------|--|-------|
| NUPL2    | nucleoporin like 2                                                                                                       | 3.8    |      |      |  |      |  |      |  | -3.5  |
| NUTF2    | nuclear transport factor 2                                                                                               | -1.5   | -1.6 |      |  |      |  |      |  |       |
| NXF1     | nuclear RNA export factor 1                                                                                              | 1.3    |      |      |  |      |  |      |  |       |
| OAS2     | 2'-5'-oligoadenylate synthetase 2, 69/71kDa                                                                              | -3.2   | -2.8 |      |  |      |  |      |  | 2.9   |
| OAZ1     | ornithine decarboxylase antizyme 1                                                                                       | -1.3   | 1.4  |      |  |      |  |      |  | 1.3   |
| OAZIN    | antizyme inhibitor 1                                                                                                     | -2.2   |      |      |  |      |  |      |  | 1.9   |
| ODC1     | ornithine decarboxylase 1                                                                                                | -1.2   | -1.5 | -2.1 |  |      |  | -2.2 |  | -6.6  |
| OGDH     | oxoglutarate (alpha-ketoglutarate) dehydrogenase (lipoamide)                                                             | 1.8    | -1.7 |      |  |      |  |      |  | -2.7  |
| OGG1     | 8-oxoguanine DNA glycosylase                                                                                             | -3.9   |      |      |  |      |  | 1.4  |  | 6.2   |
| OGT      | O-linked N-acetylglucosamine (GlcNAc) transferase (UDP-N-acetylglucosamine:polypeptide-N-acetylglucosaminyl transferase) | 2.0    | 1.3  |      |  |      |  | 2.0  |  | 2.3   |
| OIP5     | Opa interacting protein 5                                                                                                | -2.6   |      |      |  |      |  |      |  | 1.7   |
| OPA1     | optic atrophy 1 (autosomal dominant)                                                                                     | 1.5    |      |      |  |      |  |      |  | -1.6  |
| ORC1L    | origin recognition complex, subunit 1-like (yeast)                                                                       | 1.7    |      |      |  |      |  |      |  | -22.9 |
| ORC2L    | origin recognition complex, subunit 2-like (yeast)                                                                       | 2.6    |      |      |  |      |  |      |  | -3.0  |
| ORC3L    | origin recognition complex, subunit 3-like (yeast)                                                                       | 1.3    |      |      |  |      |  |      |  | -1.8  |
| ORC5L    | origin recognition complex, subunit 5-like (yeast)                                                                       | 1.3    |      | -1.3 |  |      |  | -1.5 |  | -1.9  |
| OSBP     | oxysterol binding protein                                                                                                | 1.4    |      |      |  |      |  |      |  | 1.7   |
| OSBPL8   | oxysterol binding protein-like 8                                                                                         | -1.3   |      |      |  |      |  |      |  | 1.4   |
| OSTF1    | osteoclast stimulating factor 1                                                                                          | -1.3   | 1.2  |      |  |      |  |      |  | 1.6   |
| OXSR1    | oxidative-stress responsive 1                                                                                            | 1.3    |      |      |  |      |  |      |  | -1.7  |
| P2RX4    | purinergic receptor P2X, ligand-gated ion channel, 4                                                                     | 2.0    |      |      |  |      |  |      |  |       |
| P2RX5    | purinergic receptor P2X, ligand-gated ion channel, 5                                                                     | -2.0   | 5.5  |      |  |      |  | 2.7  |  | 6.6   |
| P4HA1    | procollagen-proline, 2-oxoglutarate 4-dioxygenase (proline 4-hydroxylase), alpha polypeptide I                           | 3.0    |      |      |  | -1.3 |  |      |  | -1.5  |
| P4HB     | procollagen-proline, 2-oxoglutarate 4-dioxygenase (proline 4-hydroxylase), beta polypeptide                              | 3.7    |      |      |  |      |  | 1.5  |  | -3.0  |
| PABPC1   | poly(A) binding protein, cytoplasmic 1                                                                                   | -2.2   | -1.4 |      |  |      |  |      |  | 1.7   |
| PABPN1   | poly(A) binding protein, nuclear 1                                                                                       | 1.6    | -1.3 |      |  |      |  |      |  | -1.5  |
| PAFAH1B1 | platelet-activating factor acetylhydrolase, isoform Ib, alpha subunit 45kDa                                              | -2.4   | 1.2  |      |  |      |  |      |  | 2.9   |
| PAICS    | phosphoribosylaminoimidazole carboxylase, phosphoribosylaminoimidazole succinocarboxamide synthetase                     | 1.7    | -3.3 | -1.7 |  |      |  |      |  | -12.5 |
| PAI-RBP1 | SERPINE1 mRNA binding protein 1                                                                                          | -1.5   | -1.9 | -1.6 |  |      |  |      |  | -2.2  |
| PAK1     | p21/Cdc42/Rac1-activated kinase 1 (STE20 homolog, yeast)                                                                 | 2.5    | -1.3 | 1.5  |  |      |  |      |  | -3.4  |
| PAK2     | p21 (CDKN1A)-activated kinase 2                                                                                          | -1.6   | 1.5  | -1.2 |  |      |  |      |  | 2.0   |
| PAM      | peptidylglycine alpha-amidating monooxygenase                                                                            | 1.3    | -1.4 | 1.5  |  |      |  |      |  | -1.6  |
| PAPOLA   | poly(A) polymerase alpha                                                                                                 | 1.4    |      |      |  |      |  |      |  | -1.4  |
| PARD3    | par-3 partitioning defective 3 homolog (C. elegans)                                                                      | 2.5    |      |      |  |      |  |      |  | 3.0   |
| PARN     | poly(A)-specific ribonuclease (deadenylation nuclease)                                                                   | -2.1   |      |      |  |      |  |      |  | 2.2   |
| PARP1    | poly (ADP-ribose) polymerase family, member 1                                                                            | -2.5   | 1.7  |      |  |      |  |      |  | 2.2   |
| PAWR     | PRKC, apoptosis, WT1, regulator                                                                                          | 42.6   | -2.4 | -1.2 |  |      |  |      |  | -46.4 |
| PAX8     | paired box gene 8                                                                                                        | 3.7    |      |      |  |      |  |      |  | -3.2  |
| PAXIP1L  | PAX interacting (with transcription-activation domain) protein 1                                                         | -3.5   | 1.2  | 1.4  |  |      |  | 1.3  |  | 12.7  |
| PBEF1    | pre-B-cell colony enhancing factor 1                                                                                     | 1.7    |      |      |  |      |  |      |  | -1.6  |
| PBX3     | pre-B-cell leukemia transcription factor 3                                                                               | -172.9 | -1.5 |      |  |      |  |      |  | 135.1 |
| PC4      | SUB1 homolog (S. cerevisiae)                                                                                             | 2.4    | -1.4 |      |  |      |  |      |  | -4.6  |

|        |                                                                             |       |      |      |      |       |
|--------|-----------------------------------------------------------------------------|-------|------|------|------|-------|
| PCBP2  | poly(rC) binding protein 2                                                  | 2.0   |      |      |      | -1.9  |
| PCCB   | propionyl Coenzyme A carboxylase, beta polypeptide                          | 1.3   |      |      |      | -1.7  |
| PCF11  | PCF11, cleavage and polyadenylation factor subunit, homolog (S. cerevisiae) | -2.1  |      |      |      | 2.6   |
| PCGF4  | B lymphoma Mo-MLV insertion region (mouse)                                  | -1.5  | 1.3  |      |      | 1.2   |
| PCID1  | PCI domain containing 1 (herpesvirus entry mediator)                        | 1.2   |      |      |      | -1.6  |
| PCM1   | pericentriolar material 1                                                   | 2.3   | 1.8  |      |      | -1.9  |
| PCMT1  | protein-L-isoaspartate (D-aspartate) O-methyltransferase                    | -1.3  | 1.4  |      |      | 1.4   |
| PCNA   | proliferating cell nuclear antigen                                          | -1.7  | -1.6 |      |      | -3.7  |
| PCNT2  | pericentrin (kendrin)                                                       | 1.4   |      |      |      |       |
| PCTK1  | PCTAIRE protein kinase 1                                                    | -1.4  |      |      |      |       |
| PCTK2  | PCTAIRE protein kinase 2                                                    | -1.2  |      |      |      | 1.8   |
| PDAP1  | PDGFA associated protein 1                                                  | -3.1  |      |      |      | 3.2   |
| PDCD2  | programmed cell death 2                                                     | 2.0   | 1.3  |      |      | -2.0  |
| PDCD6  | programmed cell death 6                                                     | -11.8 | 2.0  |      |      | 20.7  |
| PDCL   | phosducin-like                                                              | -1.7  |      |      |      |       |
| PDE3B  | phosphodiesterase 3B, cGMP-inhibited                                        | 6.1   | -1.4 |      |      | -25.2 |
| PDE6D  | phosphodiesterase 6D, cGMP-specific, rod, delta                             | -2.1  | 1.2  |      |      | 2.3   |
| PDE8A  | phosphodiesterase 8A                                                        | -1.5  | 1.6  |      |      | 1.6   |
| PDHX   | pyruvate dehydrogenase complex, component X                                 | -1.5  |      |      |      | 1.2   |
| PDIA3  | protein disulfide isomerase family A, member 3                              | -1.3  |      |      |      | -1.2  |
| PDIA4  | protein disulfide isomerase family A, member 4                              | -1.2  |      |      |      | -1.7  |
| PDIA6  | protein disulfide isomerase family A, member 6                              | -1.5  | -1.3 |      |      | -1.7  |
| PDK1   | pyruvate dehydrogenase kinase, isozyme 1                                    | 2.8   |      |      |      | -5.8  |
| PDK2   | pyruvate dehydrogenase kinase, isozyme 2                                    | 3.1   |      |      | 1.2  |       |
| PDK3   | pyruvate dehydrogenase kinase, isozyme 3                                    | -1.3  | -1.6 |      |      |       |
| PDLIM5 | PDZ and LIM domain 5                                                        | 1.6   | -1.6 |      |      |       |
| PDPK1  | 3-phosphoinositide dependent protein kinase-1                               | -1.8  |      |      |      | 2.3   |
| PDXK   | pyridoxal (pyridoxine, vitamin B6) kinase                                   | 2.8   |      |      |      | -4.7  |
| PEA15  | phosphoprotein enriched in astrocytes 15                                    | -1.3  |      |      |      |       |
| PEMT   | phosphatidylethanolamine N-methyltransferase                                | -3.7  |      |      |      |       |
| PER2   | period homolog 2 (Drosophila)                                               | -2.0  | -1.7 |      |      |       |
| PEX11B | peroxisomal biogenesis factor 11B                                           | -1.4  | 1.4  |      |      | 1.9   |
| PEX14  | peroxisomal biogenesis factor 14                                            | 1.3   |      |      | -1.7 | -1.3  |
| PEX3   | peroxisomal biogenesis factor 3                                             | 1.3   | -2.4 |      |      | -2.3  |
| PFAS   | phosphoribosylformylglycinamide synthase (FGAR amidotransferase)            | -2.4  | -2.7 |      |      | -2.3  |
| PFDN5  | prefoldin subunit 5                                                         | 1.4   | 1.4  |      |      |       |
| PFKP   | phosphofructokinase, platelet                                               | 1.5   | 1.7  |      |      | -1.6  |
| PFN1   | profilin 1                                                                  | -2.1  |      |      |      | 1.8   |
| PGAM1  | phosphoglycerate mutase 1 (brain)                                           | 1.5   | -1.2 | -1.2 |      | -2.4  |
| PGD    | phosphogluconate dehydrogenase                                              | 1.8   | -1.3 |      |      | -2.1  |
| PGGT1B | protein geranylgeranyltransferase type I, beta subunit                      | -3.2  |      |      |      | 3.9   |
| PGK1   | phosphoglycerate kinase 1                                                   | 1.3   | -1.9 |      |      | -2.6  |

|         |                                                                          |      |      |      |      |       |
|---------|--------------------------------------------------------------------------|------|------|------|------|-------|
| PGM1    | phosphoglucomutase 1                                                     | 1.7  | -1.8 |      |      | -3.2  |
| PGM3    | phosphoglucomutase 3                                                     | -2.6 |      |      |      |       |
| PGRMC2  | progesterone receptor membrane component 2                               | 1.7  |      | -1.2 |      | -2.6  |
| PHB2    | prohibitin 2                                                             | -1.7 |      |      |      | 1.5   |
| PHC2    | polyhomeotic homolog 2 (Drosophila)                                      | -1.6 |      |      |      | 1.7   |
| PHF1    | PHD finger protein 1                                                     | 1.8  |      |      |      | -1.6  |
| PHF21A  | PHD finger protein 21A                                                   | 2.0  |      |      |      | -1.5  |
| PHGDH   | phosphoglycerate dehydrogenase                                           | -1.7 | -2.4 |      |      | -2.3  |
| PHKA1   | phosphorylase kinase, alpha 1 (muscle)                                   | 3.0  |      |      |      | -4.3  |
| PHKA2   | phosphorylase kinase, alpha 2 (liver)                                    | 1.7  | -1.3 |      |      |       |
| PHKB    | phosphorylase kinase, beta                                               | -1.7 | 1.4  |      |      | 2.0   |
| PIAS1   | protein inhibitor of activated STAT, 1                                   | 1.7  | 1.4  |      |      | 2.2   |
| PICALM  | phosphatidylinositol binding clathrin assembly protein                   | 2.1  | 2.0  | 1.7  | 1.5  | 2.1   |
| PIG8    | centrosomal protein 57kDa                                                | 1.6  |      |      |      | -2.3  |
| PIGC    | phosphatidylinositol glycan anchor biosynthesis, class C                 | 1.9  | 2.5  |      |      | -1.3  |
| PIK3C2A | phosphoinositide-3-kinase, class 2, alpha polypeptide                    | 2.5  | 1.7  |      |      | 1.4   |
| PIK3CA  | phosphoinositide-3-kinase, catalytic, alpha polypeptide                  | -2.5 | 1.3  |      |      | 3.6   |
| PIK3CB  | phosphoinositide-3-kinase, catalytic, beta polypeptide                   | 3.3  | 1.2  |      |      | -2.7  |
| PIK3R1  | phosphoinositide-3-kinase, regulatory subunit 1 (p85 alpha)              | 2.1  |      | 2.5  |      |       |
| PIK3R4  | phosphoinositide-3-kinase, regulatory subunit 4, p150                    | 1.3  |      |      |      | -1.3  |
| PINK1   | PTEN induced putative kinase 1                                           | 1.3  |      | 1.6  |      | 2.2   |
| PIP5K2A | phosphatidylinositol-4-phosphate 5-kinase, type II, alpha                | 1.3  |      |      |      |       |
| PIP5K3  | phosphatidylinositol-3-phosphate/phosphatidylinositol 5-kinase, type III | -1.6 |      |      |      | 1.3   |
| PITPNA  | phosphatidylinositol transfer protein, alpha                             | -2.0 | -1.3 |      |      | 2.0   |
| PITPNB  | phosphatidylinositol transfer protein, beta                              | -1.5 |      |      |      | -1.3  |
| PITRM1  | pitrilysin metalloproteinase 1                                           | 1.6  |      | 1.8  |      | -2.0  |
| PKD2    | polycystic kidney disease 2 (autosomal dominant)                         | -2.0 |      |      |      | 2.5   |
| PKIA    | protein kinase (cAMP-dependent, catalytic) inhibitor alpha               | -6.9 |      | 1.5  | -1.5 | 7.8   |
| PKM2    | pyruvate kinase, muscle                                                  | -3.2 | -2.3 |      |      |       |
| PKMYT1  | protein kinase, membrane associated tyrosine/threonine 1                 | -2.2 | 1.2  |      |      |       |
| PKN2    | protein kinase N2                                                        | 1.4  | 1.4  |      |      | 1.3   |
| PKP4    | plakophilin 4                                                            | 2.5  |      |      |      | -2.9  |
| PLAG1   | pleiomorphic adenoma gene 1                                              | -5.2 | 1.4  |      |      | 11.9  |
| PLAGL1  | pleiomorphic adenoma gene-like 1                                         | 15.8 |      | 1.6  |      | -13.0 |
| PLCB1   | phospholipase C, beta 1 (phosphoinositide-specific)                      | -7.4 | -1.5 |      |      | 4.0   |
| PLCG1   | phospholipase C, gamma 1                                                 | 1.9  | 1.9  |      |      |       |
| PLCG2   | phospholipase C, gamma 2 (phosphatidylinositol-specific)                 | -1.3 | -1.6 |      |      | -1.5  |
| PLCL2   | phospholipase C-like 2                                                   | -1.6 | 1.7  |      |      |       |
| PLEKHB2 | pleckstrin homology domain containing, family B (evectins) member 2      | 1.3  | 1.3  |      |      | -1.5  |
| PLEKHE1 | PH domain and leucine rich repeat protein phosphatase                    | -1.6 |      |      |      | -1.3  |
| PLK1    | polo-like kinase 1 (Drosophila)                                          | -1.6 | 1.5  |      |      | 2.3   |
| PLP2    | proteolipid protein 2 (colonic epithelium-enriched)                      | -3.3 | 1.5  |      |      | 8.3   |

|         |                                                                                                           |       |      |      |      |       |
|---------|-----------------------------------------------------------------------------------------------------------|-------|------|------|------|-------|
| PLS1    | plastin 1 (I isoform)                                                                                     | 9.1   | -3.2 |      |      | -21.7 |
| PLSCR1  | phospholipid scramblase 1                                                                                 | 1.8   | 1.5  |      |      | -1.4  |
| PLTP    | phospholipid transfer protein                                                                             | 13.4  |      |      |      | -30.8 |
| PLXNB2  | plexin B2                                                                                                 | -3.9  | 1.3  |      |      | 8.5   |
| PMAIP1  | phorbol-12-myristate-13-acetate-induced protein 1                                                         | -3.7  | 1.5  |      | -2.1 | 2.3   |
| PMF1    | polyamine-modulated factor 1                                                                              | -1.6  |      |      |      |       |
| PML     | promyelocytic leukemia                                                                                    | 1.8   |      |      |      | 1.4   |
| PMS1    | PMS1 postmeiotic segregation increased 1 ( <i>S. cerevisiae</i> )                                         | 2.5   | -1.3 |      |      | -1.7  |
| PMS2L3  | postmeiotic segregation increased 2-like 3                                                                | -1.7  |      |      |      | 1.7   |
| PMVK    | phosphomevalonate kinase                                                                                  | -1.3  |      |      |      | -1.4  |
| PNN     | pinin, desmosome associated protein                                                                       | 1.8   | -1.5 |      | -1.5 | -2.6  |
| PODXL   | podocalyxin-like                                                                                          | -1.9  | -2.8 | -1.3 |      | -1.4  |
| POLA    | polymerase (DNA directed), alpha 1                                                                        | -1.5  | -2.7 |      |      | -2.7  |
| POLA2   | polymerase (DNA directed), alpha 2 (70kD subunit)                                                         | -1.4  | 1.3  |      |      |       |
| POLB    | polymerase (DNA directed), beta                                                                           | 1.3   | -1.5 |      |      | -1.4  |
| POLD2   | polymerase (DNA directed), delta 2, regulatory subunit 50kDa                                              | 1.9   | -1.9 |      |      | -13.9 |
| POLD3   | polymerase (DNA-directed), delta 3, accessory subunit                                                     | -1.6  | -1.8 |      |      | -2.2  |
| POLE    | polymerase (DNA directed), epsilon                                                                        | -1.4  |      |      |      | -3.9  |
| POLE2   | polymerase (DNA directed), epsilon 2 (p59 subunit)                                                        | -1.8  | -2.1 |      |      | -2.0  |
| POLE3   | polymerase (DNA directed), epsilon 3 (p17 subunit)                                                        | -1.5  | -2.0 |      |      | -2.0  |
| POLG2   | polymerase (DNA directed), gamma 2, accessory subunit                                                     | 1.7   | -1.3 |      |      | -2.6  |
| POLR2A  | polymerase (RNA) II (DNA directed) polypeptide A, 220kDa                                                  | -2.4  |      |      |      | 2.2   |
| POLR2B  | polymerase (RNA) II (DNA directed) polypeptide B, 140kDa                                                  | 2.6   |      |      |      | -3.0  |
| POLR2E  | polymerase (RNA) II (DNA directed) polypeptide E, 25kDa                                                   | -1.5  | -1.9 |      |      | -1.6  |
| POLR2G  | polymerase (RNA) II (DNA directed) polypeptide G                                                          | -1.7  | -1.4 |      |      |       |
| POLR2H  | polymerase (RNA) II (DNA directed) polypeptide H                                                          | 1.4   | -1.9 | -1.6 |      | -2.9  |
| POLR2I  | polymerase (RNA) II (DNA directed) polypeptide I, 14.5kDa                                                 | -1.6  | -1.8 |      |      | -1.7  |
| POLR2J  | polymerase (RNA) II (DNA directed) polypeptide J, 13.3kDa                                                 | -1.3  |      |      |      |       |
| POLR3C  | polymerase (RNA) III (DNA directed) polypeptide C (62kD)                                                  | -1.8  |      |      |      | -1.4  |
| POLR3G  | polymerase (RNA) III (DNA directed) polypeptide G (32kD)                                                  | 1.3   | -3.0 |      |      | -3.8  |
| PON2    | paraoxonase 2                                                                                             | 43.3  | 19.7 | 1.4  |      | -40.8 |
| POP4    | processing of precursor 4, ribonuclease P/MRP subunit ( <i>S. cerevisiae</i> )                            | -1.3  |      |      |      |       |
| POU2AF1 | POU domain, class 2, associating factor 1                                                                 | -56.3 |      |      | -1.9 | 25.8  |
| PPARBP  | PPAR binding protein                                                                                      | 1.8   | -1.5 |      |      | -2.0  |
| PPAT    | phosphoribosyl pyrophosphate amidotransferase                                                             | 2.0   | -2.0 | -1.7 |      | -4.7  |
| PPFIA1  | protein tyrosine phosphatase, receptor type, f polypeptide (PTPRF), interacting protein (liprin), alpha 1 | 1.3   |      |      |      | -1.4  |
| PPIA    | peptidylprolyl isomerase A (cyclophilin A)                                                                | 1.9   | -1.2 |      |      | -2.8  |
| PPIB    | peptidylprolyl isomerase B (cyclophilin B)                                                                | 1.5   |      |      |      | -1.7  |
| PPIF    | peptidylprolyl isomerase F (cyclophilin F)                                                                | -1.3  | -2.6 |      |      | -4.9  |
| PPIG    | peptidylprolyl isomerase G (cyclophilin G)                                                                | 1.8   | -1.3 |      |      | -2.7  |
| PPM1A   | protein phosphatase 1A (formerly 2C), magnesium-dependent, alpha isoform                                  | -1.7  | 1.5  |      |      | 1.9   |
| PPM1B   | protein phosphatase 1B (formerly 2C), magnesium-dependent, beta isoform                                   | 1.3   | 1.4  |      |      | 1.7   |

|          |                                                                                            |       |      |      |     |       |
|----------|--------------------------------------------------------------------------------------------|-------|------|------|-----|-------|
| PPP1CA   | protein phosphatase 1, catalytic subunit, alpha isoform                                    | -2.1  |      |      |     | 1.5   |
| PPP1R10  | protein phosphatase 1, regulatory subunit 10                                               | 1.4   |      |      | 1.2 |       |
| PPP1R11  | protein phosphatase 1, regulatory (inhibitor) subunit 11                                   | -1.6  |      |      |     | 1.6   |
| PPP1R12A | protein phosphatase 1, regulatory (inhibitor) subunit 12A                                  | 1.4   | 1.7  |      |     | 1.8   |
| PPP1R2   | protein phosphatase 1, regulatory (inhibitor) subunit 2                                    | 2.1   | 1.4  |      |     | 1.4   |
| PPP1R7   | protein phosphatase 1, regulatory subunit 7                                                | -2.5  |      |      |     | 2.0   |
| PPP2CA   | protein phosphatase 2 (formerly 2A), catalytic subunit, alpha isoform                      | -1.4  |      |      |     |       |
| PPP2CB   | protein phosphatase 2 (formerly 2A), catalytic subunit, beta isoform                       | 1.5   | 1.2  |      |     |       |
| PPP2R2A  | protein phosphatase 2 (formerly 2A), regulatory subunit B (PR 52), alpha isoform           | 2.4   | 1.7  |      |     | -1.9  |
| PPP2R4   | protein phosphatase 2A, regulatory subunit B' (PR 53)                                      | -1.2  |      |      |     |       |
| PPP2R5A  | protein phosphatase 2, regulatory subunit B (B56), alpha isoform                           | -1.2  | 1.9  |      |     | 1.3   |
| PPP2R5C  | protein phosphatase 2, regulatory subunit B (B56), gamma isoform                           | -25.3 |      |      |     | 5.3   |
| PPP2R5E  | protein phosphatase 2, regulatory subunit B (B56), epsilon isoform                         | 2.4   | 1.2  |      |     | -4.4  |
| PPP3CB   | protein phosphatase 3 (formerly 2B), catalytic subunit, beta isoform (calcineurin A beta)  | 1.7   | 1.6  |      |     | -1.8  |
| PPP4C    | protein phosphatase 4 (formerly X), catalytic subunit                                      | -1.8  |      |      |     | 1.8   |
| PPP6C    | protein phosphatase 6, catalytic subunit                                                   | -1.8  |      |      |     | 1.3   |
| PPRC1    | peroxisome proliferator-activated receptor gamma, coactivator-related 1                    | 1.7   | -2.4 |      |     | -4.7  |
| PPT1     | palmitoyl-protein thioesterase 1 (ceroid-lipofuscinosis, neuronal 1, infantile)            | 1.7   | -1.3 |      |     | -2.2  |
| PQBP1    | polyglutamine binding protein 1                                                            | 1.3   | 1.3  |      |     | -1.5  |
| PRDX1    | peroxiredoxin 1                                                                            | -2.5  | -1.7 | -1.3 |     |       |
| PRDX2    | peroxiredoxin 2                                                                            | -8.5  | -3.1 |      |     | 3.4   |
| PRDX4    | peroxiredoxin 4                                                                            | 1.3   | -2.5 | -1.2 |     | -3.3  |
| PRDX6    | peroxiredoxin 6                                                                            | 1.5   | 1.4  |      |     | -1.3  |
| PREI3    | preimplantation protein 3                                                                  | 1.5   | 1.3  |      |     | -1.7  |
| PREP     | prolyl endopeptidase                                                                       | 1.5   |      |      |     | -1.8  |
| PRG1     | proteoglycan 1, secretory granule                                                          | 2.7   | 1.5  |      | 3.2 | 2.7   |
| PRIM1    | primase, polypeptide 1, 49kDa                                                              | -1.3  | -1.8 |      |     | -2.3  |
| PRIM2A   | primase, polypeptide 2A, 58kDa                                                             | 1.4   |      |      |     | -1.4  |
| PRKAA1   | protein kinase, AMP-activated, alpha 1 catalytic subunit                                   | 1.3   | 1.6  |      |     |       |
| PRKAB1   | protein kinase, AMP-activated, beta 1 non-catalytic subunit                                | 1.5   |      |      |     |       |
| PRKAB2   | protein kinase, AMP-activated, beta 2 non-catalytic subunit                                | 5.1   |      |      |     | 2.3   |
| PRKACB   | protein kinase, cAMP-dependent, catalytic, beta                                            | 2.4   | -2.7 |      |     | -1.6  |
| PRKAG1   | protein kinase, AMP-activated, gamma 1 non-catalytic subunit                               | 1.2   |      |      |     |       |
| PRKAR1A  | protein kinase, cAMP-dependent, regulatory, type I, alpha (tissue specific extinguisher 1) | 2.0   | 1.4  |      |     |       |
| PRKCA    | protein kinase C, alpha                                                                    | 6.6   | 1.3  | 1.6  |     | -7.0  |
| PRKCB1   | protein kinase C, beta 1                                                                   | 20.7  | 1.6  |      |     | -18.3 |
| PRKCBP1  | protein kinase C binding protein 1                                                         | -1.2  | 1.4  |      |     | 1.6   |
| PRKCH    | protein kinase C, eta                                                                      | 3.4   | 3.7  |      |     | -2.4  |
| PRKCQ    | protein kinase C, theta                                                                    | 1.6   |      |      |     | -2.4  |
| PRKD2    | protein kinase D2                                                                          | -3.2  | 1.8  |      |     | 4.8   |
| PRKDC    | protein kinase, DNA-activated, catalytic polypeptide                                       | -1.2  | -1.6 |      |     | -2.1  |
| PRKRA    | protein kinase, interferon-inducible double stranded RNA dependent activator               | -1.9  | 2.5  |      |     | 5.0   |

|         |                                                                                                                     |        |      |      |      |       |
|---------|---------------------------------------------------------------------------------------------------------------------|--------|------|------|------|-------|
| PRKX    | protein kinase, X-linked                                                                                            | -2.3   | 3.4  |      |      | 5.3   |
| PRMT3   | protein arginine methyltransferase 3                                                                                | -1.3   | -2.4 | -1.6 | -2.1 | -2.8  |
| PRNP    | prion protein (p27-30) (Creutzfeldt-Jakob disease, Gerstmann-Strausler-Scheinker syndrome, fatal familial insomnia) | -1.4   |      |      |      |       |
| PROCR   | protein C receptor, endothelial (EPCR)                                                                              | 6.6    | -1.5 |      | -2.2 | -12.1 |
| PRPF19  | PRP19/PSO4 pre-mRNA processing factor 19 homolog ( <i>S. cerevisiae</i> )                                           | -1.3   | -1.9 |      |      | -2.2  |
| PRPF31  | PRP31 pre-mRNA processing factor 31 homolog ( <i>S. cerevisiae</i> )                                                | -1.2   |      |      | -1.6 | -2.1  |
| PRPF4   | PRP4 pre-mRNA processing factor 4 homolog (yeast)                                                                   | -1.3   | -2.2 |      |      | -2.1  |
| PRPF8   | PRP8 pre-mRNA processing factor 8 homolog ( <i>S. cerevisiae</i> )                                                  | -1.4   | -1.3 |      |      |       |
| PRPS1   | phosphoribosyl pyrophosphate synthetase 1                                                                           | -2.1   | -2.6 | -1.5 |      | -2.3  |
| PRPS2   | phosphoribosyl pyrophosphate synthetase 2                                                                           | 1.3    |      |      |      | -2.1  |
| PRPSAP1 | phosphoribosyl pyrophosphate synthetase-associated protein 1                                                        | 1.9    |      |      |      | -1.3  |
| PRPSAP2 | phosphoribosyl pyrophosphate synthetase-associated protein 2                                                        | -1.8   |      |      |      |       |
| PRSS25  | HtrA serine peptidase 2                                                                                             | 1.5    | -1.5 |      |      | -1.9  |
| PRUNE   | prune homolog ( <i>Drosophila</i> )                                                                                 | -1.5   | -1.9 |      |      |       |
| PSAP    | prosaposin (variant Gaucher disease and variant metachromatic leukodystrophy)                                       | 3.1    | -1.4 |      |      |       |
| PSEN1   | presenilin 1 (Alzheimer disease 3)                                                                                  | 1.3    | 1.5  | 1.7  | 1.5  | 2.0   |
| PSF1    | GINS complex subunit 1 (Psf1 homolog)                                                                               | -1.9   | -1.6 |      |      | -2.3  |
| PSIP1   | PC4 and SFRS1 interacting protein 1                                                                                 | -2.0   | -1.5 |      |      | 2.5   |
| PSMA1   | proteasome (prosome, macropain) subunit, alpha type, 1                                                              | -1.2   |      |      |      | -1.3  |
| PSMA2   | proteasome (prosome, macropain) subunit, alpha type, 2                                                              | 3.5    | -1.3 |      |      | -5.0  |
| PSMA3   | proteasome (prosome, macropain) subunit, alpha type, 3                                                              | 1.3    | -1.7 |      |      | -1.7  |
| PSMA6   | proteasome (prosome, macropain) subunit, alpha type, 6                                                              | -1.3   |      |      |      | 1.3   |
| PSMB2   | proteasome (prosome, macropain) subunit, beta type, 2                                                               | -1.2   | -1.6 |      |      | -1.5  |
| PSMB4   | proteasome (prosome, macropain) subunit, beta type, 4                                                               | 1.3    | -1.4 |      |      | -1.2  |
| PSMB5   | proteasome (prosome, macropain) subunit, beta type, 5                                                               | 1.5    | -1.4 | -1.4 | -1.4 | -2.2  |
| PSMB6   | proteasome (prosome, macropain) subunit, beta type, 6                                                               | -1.6   |      |      |      |       |
| PSMB8   | proteasome (prosome, macropain) subunit, beta type, 8 (large multifunctional peptidase 7)                           | -18.9  |      |      |      | 16.2  |
| PSMB9   | proteasome (prosome, macropain) subunit, beta type, 9 (large multifunctional peptidase 2)                           | -202.7 | -1.3 |      |      | 22.2  |
| PSMC3   | proteasome (prosome, macropain) 26S subunit, ATPase, 3                                                              | -1.4   |      |      |      | -1.5  |
| PSMC5   | proteasome (prosome, macropain) 26S subunit, ATPase, 5                                                              | 1.6    |      |      |      | -2.6  |
| PSMC6   | proteasome (prosome, macropain) 26S subunit, ATPase, 6                                                              | 1.3    |      |      |      | -1.4  |
| PSMD1   | proteasome (prosome, macropain) 26S subunit, non-ATPase, 1                                                          | -1.6   | -1.4 |      |      |       |
| PSMD10  | proteasome (prosome, macropain) 26S subunit, non-ATPase, 10                                                         | -1.2   |      |      |      | -1.2  |
| PSMD12  | proteasome (prosome, macropain) 26S subunit, non-ATPase, 12                                                         | 1.6    |      |      |      | -2.2  |
| PSMD14  | proteasome (prosome, macropain) 26S subunit, non-ATPase, 14                                                         | 1.3    |      |      |      | -2.4  |
| PSMD2   | proteasome (prosome, macropain) 26S subunit, non-ATPase, 2                                                          | 1.3    |      |      |      | -1.8  |
| PSMD4   | proteasome (prosome, macropain) 26S subunit, non-ATPase, 4                                                          | 1.3    |      |      |      | -1.6  |
| PSMD5   | proteasome (prosome, macropain) 26S subunit, non-ATPase, 5                                                          | 3.0    |      |      |      | -2.5  |
| PSMD8   | proteasome (prosome, macropain) 26S subunit, non-ATPase, 8                                                          | -1.5   | -1.3 |      |      |       |
| PSME1   | proteasome (prosome, macropain) activator subunit 1 (PA28 alpha)                                                    | -1.9   | -1.8 |      |      |       |
| PSME2   | proteasome (prosome, macropain) activator subunit 2 (PA28 beta)                                                     | -2.4   | -1.8 |      |      |       |
| PSME3   | proteasome (prosome, macropain) activator subunit 3 (PA28 gamma; Ki)                                                | 1.5    | -2.2 |      | -1.4 | -2.6  |

|             |                                                                                               |       |      |      |      |        |
|-------------|-----------------------------------------------------------------------------------------------|-------|------|------|------|--------|
| PSPH        | phosphoserine phosphatase                                                                     | 3.3   | -2.0 |      |      | -8.6   |
| PTEN        | phosphatase and tensin homolog (mutated in multiple advanced cancers 1)                       | 4.2   | -1.3 | 2.3  |      | -4.7   |
| PTK2B       | PTK2B protein tyrosine kinase 2 beta                                                          | -1.3  |      | 2.1  | 4.2  | 1.9    |
| PTMA        | prothymosin, alpha (gene sequence 28)                                                         | -1.7  | -1.3 |      |      |        |
| PTP4A1      | protein tyrosine phosphatase type IVA, member 1                                               | -1.7  | -1.8 |      |      | -1.9   |
| PTP4A2      | protein tyrosine phosphatase type IVA, member 2                                               | 1.2   | 1.5  |      |      | -1.9   |
| PTPLB       | protein tyrosine phosphatase-like (proline instead of catalytic arginine), member b           | 2.2   | 2.3  |      |      | 2.2    |
| PTPN11      | protein tyrosine phosphatase, non-receptor type 11 (Noonan syndrome 1)                        | 1.3   |      |      |      | -1.3   |
| PTPN12      | protein tyrosine phosphatase, non-receptor type 12                                            | -10.9 | 2.4  | 1.3  |      | 75.8   |
| PTPN2       | protein tyrosine phosphatase, non-receptor type 2                                             | 1.3   | -1.2 | -1.3 | -2.1 | -1.6   |
| PTPN22      | protein tyrosine phosphatase, non-receptor type 22 (lymphoid)                                 | 2.9   |      |      |      | -8.4   |
| PTPN4       | protein tyrosine phosphatase, non-receptor type 4 (megakaryocyte)                             | -1.6  | -1.6 |      |      |        |
| PTPN6       | protein tyrosine phosphatase, non-receptor type 6                                             | -5.5  |      | 1.3  |      | 7.8    |
| PTPN7       | protein tyrosine phosphatase, non-receptor type 7                                             | 3.3   | -1.5 |      |      | -4.7   |
| PTPRA       | protein tyrosine phosphatase, receptor type, A                                                | 1.3   |      |      |      |        |
| PTPRC       | protein tyrosine phosphatase, receptor type, C                                                | -6.4  |      |      |      | 11.4   |
| PTPRCAP     | protein tyrosine phosphatase, receptor type, C-associated protein                             | -2.1  | 1.5  |      |      | 3.6    |
| PTPRF       | protein tyrosine phosphatase, receptor type, F                                                | 91.0  |      |      |      | -122.2 |
| PTPRM       | protein tyrosine phosphatase, receptor type, M                                                | 8.5   |      | 3.8  | 13.6 | -19.3  |
| PTS         | 6-pyruvoyltetrahydropterin synthase                                                           | -2.4  | -1.3 | -1.6 |      | 1.8    |
| PTTG1       | pituitary tumor-transforming 1                                                                | -2.1  |      |      |      | 1.4    |
| PTTG1IP     | pituitary tumor-transforming 1 interacting protein                                            | 1.4   | 1.5  |      |      |        |
| PUM2        | pumilio homolog 2 (Drosophila)                                                                | -1.4  |      |      |      | 1.4    |
| PURA        | purine-rich element binding protein A                                                         | -1.3  |      |      |      | 1.3    |
| PXMP3       | peroxisomal membrane protein 3, 35kDa (Zellweger syndrome)                                    | -1.7  | 1.7  |      | 4.3  | 2.6    |
| QDPR        | quinoid dihydropteridine reductase                                                            | 2.2   |      |      |      | -3.8   |
| QKI         | quaking homolog, KH domain RNA binding (mouse)                                                | 2.7   | 2.5  |      | -1.5 | -1.7   |
| QPRT        | quinolate phosphoribosyltransferase (nicotinate-nucleotide pyrophosphorylase (carboxylating)) | -2.1  | -3.6 |      |      | 1.4    |
| RAB11A      | RAB11A, member RAS oncogene family                                                            | -2.2  | 1.3  |      |      | 1.5    |
| RAB11B      | RAB11B, member RAS oncogene family                                                            | -1.4  |      |      |      |        |
| RAB14       | RAB14, member RAS oncogene family                                                             | 1.3   | 1.3  |      |      |        |
| RAB1A       | RAB1A, member RAS oncogene family                                                             | 1.5   | 1.3  |      |      | -1.3   |
| RAB2        | RAB2, member RAS oncogene family                                                              | -1.9  |      |      |      | 2.1    |
| RAB27A      | RAB27A, member RAS oncogene family                                                            | 2.2   | -1.8 |      |      | -3.5   |
| RAB31       | RAB31, member RAS oncogene family                                                             | 3.8   |      |      |      | -13.0  |
| RAB3GAP     | RAB3 GTPase activating protein subunit 1 (catalytic)                                          | 1.8   | -1.5 |      |      |        |
| RAB3-GAP150 | RAB3 GTPase activating protein subunit 2 (non-catalytic)                                      | 1.3   |      |      |      |        |
| RAB40B      | RAB40B, member RAS oncogene family                                                            | -1.7  |      | -1.3 |      | -1.5   |
| RAB4A       | RAB4A, member RAS oncogene family                                                             | 3.8   |      |      |      | -4.7   |
| RAB5A       | RAB5A, member RAS oncogene family                                                             | 1.2   | 1.3  |      |      |        |
| RAB5C       | RAB5C, member RAS oncogene family                                                             | 1.2   |      |      |      |        |
| RAB6A       | RAB6A, member RAS oncogene family                                                             | -1.4  | 1.5  |      |      | 1.7    |

|          |                                                                                          |        |      |      |      |       |
|----------|------------------------------------------------------------------------------------------|--------|------|------|------|-------|
| RAB6IP2  | ELKS/RAB6-interacting/CAST family member 1                                               | -1.3   |      | 1.8  |      | 5.3   |
| RAB7L1   | RAB7, member RAS oncogene family-like 1                                                  | 2.1    | -1.4 |      |      | -2.9  |
| RAB9A    | RAB9, member RAS oncogene family                                                         | 1.3    |      |      |      |       |
| RAB9P40  | Rab9 effector protein with kelch motifs                                                  | 1.9    | -3.7 | -1.8 | -2.1 | -12.1 |
| RABAC1   | Rab acceptor 1 (prenylated)                                                              | -1.5   |      |      |      | 3.1   |
| RABEP1   | rabaptin, RAB GTPase binding effector protein 1                                          | -2.1   |      |      |      | 2.4   |
| RABGGTB  | Rab geranylgeranyltransferase, beta subunit                                              | 2.1    | -1.8 | -1.3 | -1.7 | -1.8  |
| RABIF    | RAB interacting factor                                                                   | -1.2   |      |      |      | 1.5   |
| RAC1     | ras-related C3 botulinum toxin substrate 1 (rho family, small GTP binding protein Rac1)  | -1.9   | 1.4  |      |      | 2.0   |
| RAC2     | ras-related C3 botulinum toxin substrate 2 (rho family, small GTP binding protein Rac2)  | -2.7   |      |      |      | 1.3   |
| RAD1     | RAD1 homolog (S. pombe)                                                                  | -1.6   | -1.7 |      |      | -3.2  |
| RAD21    | RAD21 homolog (S. pombe)                                                                 | -2.3   | 1.3  |      |      | 2.5   |
| RAD23B   | RAD23 homolog B (S. cerevisiae)                                                          | -1.3   |      |      |      |       |
| RAD51AP1 | RAD51 associated protein 1                                                               | -2.8   | -1.4 |      |      | -1.3  |
| RAE1     | RAE1 RNA export 1 homolog (S. pombe)                                                     | -1.3   | -1.4 |      |      | -1.4  |
| RAF1     | v-raf-1 murine leukemia viral oncogene homolog 1                                         | -1.3   |      |      |      |       |
| RAFTLIN  | raftlin, lipid raft linker 1                                                             | -1.5   | -1.5 |      |      |       |
| RAG1     | recombination activating gene 1                                                          | -32.2  |      | -3.6 | -4.2 | 14.5  |
| RAG2     | recombination activating gene 2                                                          | -7.4   |      |      |      | 6.4   |
| RALA     | v-ral simian leukemia viral oncogene homolog A (ras related)                             | 1.7    | -1.3 |      |      | -2.1  |
| RALBP1   | ralA binding protein 1                                                                   | -1.8   | -1.4 |      |      | 1.2   |
| RALY     | RNA binding protein, autoantigenic (hnRNP-associated with lethal yellow homolog (mouse)) | -1.4   |      |      |      | 1.2   |
| RAN      | RAN, member RAS oncogene family                                                          | -1.2   | -1.2 |      |      | -1.4  |
| RANBP1   | RAN binding protein 1                                                                    | -1.9   |      |      |      | -2.8  |
| RANBP2   | RAN binding protein 2                                                                    | 2.5    | -1.4 |      |      | -1.9  |
| RANBP5   | RAN binding protein 5                                                                    | -1.3   | -2.0 |      | -1.5 | -2.3  |
| RANBP9   | RAN binding protein 9                                                                    | -1.6   | -1.3 |      |      | 2.1   |
| RAP1A    | RAP1A, member of RAS oncogene family                                                     | 2.0    |      |      |      | -2.2  |
| RAP1GDS1 | RAP1, GTP-GDP dissociation stimulator 1                                                  | -1.5   |      |      |      | 2.0   |
| RAP2A    | RAP2A, member of RAS oncogene family                                                     | -1.4   | 1.6  |      |      | 4.0   |
| RAPGEF2  | Rap guanine nucleotide exchange factor (GEF) 2                                           | 1.8    | 2.0  |      |      | 4.2   |
| RASA1    | RAS p21 protein activator (GTPase activating protein) 1                                  | 1.9    | 2.3  | 1.9  | 2.0  | 3.5   |
| RASA4    | RAS p21 protein activator 4                                                              | 2.0    |      |      |      | -3.4  |
| RASGRP1  | RAS guanyl releasing protein 1 (calcium and DAG-regulated)                               | -111.1 | -7.2 |      |      |       |
| RASGRP2  | RAS guanyl releasing protein 2 (calcium and DAG-regulated)                               | -2.3   | 2.1  |      |      | 4.4   |
| RASSF2   | Ras association (RalGDS/AF-6) domain family 2                                            | -6.4   | -2.5 |      |      | 3.5   |
| RB1      | retinoblastoma 1 (including osteosarcoma)                                                | -2.6   | 1.5  |      |      | 3.1   |
| RB1CC1   | RB1-inducible coiled-coil 1                                                              | -1.4   | 1.7  |      |      | 1.7   |
| RBBP4    | retinoblastoma binding protein 4                                                         | -1.3   | -1.4 |      |      | -1.5  |
| RBBP5    | retinoblastoma binding protein 5                                                         | -1.3   |      |      |      | 1.3   |
| RBBP6    | retinoblastoma binding protein 6                                                         | -1.8   |      |      |      | 2.5   |
| RBBP8    | retinoblastoma binding protein 8                                                         | -1.9   | -1.7 | -1.3 |      | -1.5  |

|        |                                                                 |       |      |      |      |       |
|--------|-----------------------------------------------------------------|-------|------|------|------|-------|
| RBL1   | retinoblastoma-like 1 (p107)                                    | -1.8  |      |      |      |       |
| RBL2   | retinoblastoma-like 2 (p130)                                    | 1.5   | 1.5  |      |      | -1.3  |
| RBM4   | RNA binding motif protein 4                                     | 1.7   | 1.3  |      |      |       |
| RBM4B  | RNA binding motif protein 4B                                    | -1.7  |      |      |      |       |
| RBM5   | RNA binding motif protein 5                                     | 1.6   |      | 1.4  | 1.3  | 2.2   |
| RBM8A  | RNA binding motif protein 8A                                    | 2.3   | 1.5  |      |      | -3.3  |
| RBMS1  | RNA binding motif, single stranded interacting protein 1        | 3.0   | 4.3  |      |      | 2.3   |
| RBMX   | RNA binding motif protein, X-linked                             | 1.4   |      |      |      | -1.9  |
| RBPSUH | recombining binding protein suppressor of hairless (Drosophila) | 1.9   | 1.4  |      |      | 1.2   |
| RCHY1  | ring finger and CHY zinc finger domain containing 1             | 1.5   |      |      |      | -1.6  |
| RCN1   | reticulocalbin 1, EF-hand calcium binding domain                | -1.5  | 1.2  | 1.5  |      | 2.3   |
| RCN2   | reticulocalbin 2, EF-hand calcium binding domain                | 1.4   | 2.0  |      |      |       |
| RCOR1  | REST corepressor 1                                              | -1.3  |      |      |      | 1.3   |
| RCP9   | calcitonin gene-related peptide-receptor component protein      | -1.5  | -1.5 |      |      |       |
| RDBP   | RD RNA binding protein                                          | -1.2  |      |      |      | -1.6  |
| RDH11  | retinol dehydrogenase 11 (all-trans/9-cis/11-cis)               | -1.3  | -1.8 |      |      | -1.6  |
| RECQL  | RecQ protein-like (DNA helicase Q1-like)                        | -1.4  |      | 1.6  |      | 1.4   |
| REL    | v-rel reticuloendotheliosis viral oncogene homolog (avian)      | 2.4   | 1.5  |      | 2.4  | -2.1  |
| REV3L  | REV3-like, catalytic subunit of DNA polymerase zeta (yeast)     | -2.1  | 1.5  |      |      | 2.2   |
| RFC1   | replication factor C (activator 1) 1, 145kDa                    | -1.2  | -1.4 | 1.5  |      | -2.1  |
| RFC2   | replication factor C (activator 1) 2, 40kDa                     | -3.9  | -1.5 |      |      | -1.5  |
| RFC3   | replication factor C (activator 1) 3, 38kDa                     | -2.1  | -1.5 |      |      | -1.5  |
| RFC5   | replication factor C (activator 1) 5, 36.5kDa                   | -1.3  | -1.7 |      |      | -2.9  |
| RFK    | riboflavin kinase                                               | -1.9  | -2.1 |      |      | -1.3  |
| RFX5   | regulatory factor X, 5 (influences HLA class II expression)     | -1.6  |      |      |      | -1.6  |
| RGS10  | regulator of G-protein signalling 10                            | 19.3  | -2.5 |      |      | -19.8 |
| RGS19  | regulator of G-protein signalling 19                            | -1.8  | -1.3 | -1.3 | -1.6 | 2.2   |
| RHEB   | Ras homolog enriched in brain                                   | -1.6  | 1.9  |      |      | 2.9   |
| RHOA   | ras homolog gene family, member A                               | -1.4  | 1.4  | 1.2  |      | 1.4   |
| RHOC   | ras homolog gene family, member C                               | 3.0   | 3.2  |      |      | 2.3   |
| RHOG   | ras homolog gene family, member G (rho G)                       | 1.9   |      |      |      | -1.6  |
| RHOH   | ras homolog gene family, member H                               | -15.8 | 1.3  |      |      | 38.1  |
| RHOQ   | ras homolog gene family, member Q                               | 1.8   | 1.3  |      |      | -1.7  |
| RIF1   | RAP1 interacting factor homolog (yeast)                         | 2.0   | -1.3 |      |      | -6.8  |
| RIMS3  | regulating synaptic membrane exocytosis 3                       | -6.8  |      |      |      | 12.1  |
| RIOK3  | RIO kinase 3 (yeast)                                            | 1.7   |      |      |      | 1.5   |
| RIPK1  | receptor (TNFRSF)-interacting serine-threonine kinase 1         | 1.5   |      |      |      |       |
| RIT1   | Ras-like without CAAX 1                                         | -1.4  | 1.8  |      |      | 2.1   |
| RNF13  | ring finger protein 13                                          | 1.3   | -1.5 |      |      |       |
| RNF139 | ring finger protein 139                                         | 1.4   |      |      |      |       |
| RNF144 | ring finger protein 144                                         | 3.5   |      |      |      | -4.3  |
| RNF6   | ring finger protein (C3H2C3 type) 6                             | -2.2  | 1.2  |      |      | 2.2   |

|        |                                            |      |      |      |      |      |
|--------|--------------------------------------------|------|------|------|------|------|
| RNGTT  | RNA guanylyltransferase and 5'-phosphatase | -1.6 |      |      |      |      |
| RNH    | ribonuclease/angiogenin inhibitor 1        | 2.4  | -1.5 |      | -1.3 | -4.2 |
| RNMT   | RNA (guanine-7-) methyltransferase         | 1.3  |      |      |      | -1.5 |
| RNPC2  | RNA binding motif protein 39               | 1.8  | 2.3  |      |      | 1.3  |
| RNPS1  | RNA binding protein S1, serine-rich domain | -5.0 | -1.2 |      |      | 2.5  |
| RNUT1  | snurportin 1                               | 1.3  |      |      |      | -1.5 |
| RPA1   | replication protein A1, 70kDa              | -2.8 | -1.6 |      |      | 1.5  |
| RPA3   | replication protein A3, 14kDa              | -2.0 |      |      |      |      |
| RPE    | ribulose-5-phosphate-3-epimerase           | -2.1 | -1.5 |      |      | 1.4  |
| RPGR   | retinitis pigmentosa GTPase regulator      | 6.5  |      | -1.6 |      |      |
| RPL12  | ribosomal protein L12                      | 1.5  |      |      |      |      |
| RPL13  | ribosomal protein L13                      | 1.4  |      |      |      | -3.0 |
| RPL13A | ribosomal protein L13a                     | 1.4  |      |      |      | -1.2 |
| RPL15  | ribosomal protein L15                      | 1.5  | 2.1  |      |      | -1.4 |
| RPL17  | ribosomal protein L17                      | 2.1  | -1.8 |      |      | -2.3 |
| RPL18A | ribosomal protein L18a                     | 1.4  | 1.3  |      |      |      |
| RPL22  | ribosomal protein L22                      | 1.2  |      |      |      |      |
| RPL23  | ribosomal protein L23                      | 1.3  | -1.3 |      |      |      |
| RPL29  | ribosomal protein L29                      | 2.0  | 1.4  |      |      | -1.5 |
| RPL3   | ribosomal protein L3                       | 1.3  |      |      |      |      |
| RPL31  | ribosomal protein L31                      | 2.9  | 1.3  |      |      | -3.4 |
| RPL35  | ribosomal protein L35                      | 2.2  | 2.4  |      |      | -1.8 |
| RPL37  | ribosomal protein L37                      | 1.6  | -1.5 |      |      | -1.8 |
| RPL38  | ribosomal protein L38                      | 2.0  |      |      |      | -1.5 |
| RPL4   | ribosomal protein L4                       | 1.3  |      |      |      |      |
| RPL5   | ribosomal protein L5                       | 1.3  | 1.2  |      |      |      |
| RPLP2  | ribosomal protein, large, P2               | 1.4  |      |      |      | -1.7 |
| RPN1   | ribophorin I                               | 1.5  |      |      |      | -2.3 |
| RPN2   | ribophorin II                              | 1.7  | -1.5 |      |      | -2.6 |
| RPP14  | ribonuclease P 14kDa subunit               | 1.9  | -1.7 |      |      | -2.7 |
| RPP38  | ribonuclease P/MRP 38kDa subunit           | 1.7  | -1.5 | -1.2 |      | -1.8 |
| RPS10  | ribosomal protein S10                      | 1.3  | 1.4  |      |      |      |
| RPS14  | ribosomal protein S14                      | 1.5  | 1.6  |      |      |      |
| RPS15A | ribosomal protein S15a                     | 1.5  |      |      |      | 1.2  |
| RPS17  | ribosomal protein S17                      | 1.5  | 1.5  |      |      |      |
| RPS18  | ribosomal protein S18                      | 2.2  |      |      |      |      |
| RPS19  | ribosomal protein S19                      | 1.3  | -1.6 |      |      |      |
| RPS2   | ribosomal protein S2                       | 2.6  |      |      |      | -1.9 |
| RPS21  | ribosomal protein S21                      | 3.1  | 1.2  |      |      | -3.3 |
| RPS23  | ribosomal protein S23                      | 2.0  |      |      |      | -2.1 |
| RPS24  | ribosomal protein S24                      | 2.2  |      |      |      | -3.2 |
| RPS28  | ribosomal protein S28                      | 1.2  |      |      |      |      |

|         |                                                                                                 |       |      |      |      |       |
|---------|-------------------------------------------------------------------------------------------------|-------|------|------|------|-------|
| RPS3    | ribosomal protein S3                                                                            | 1.2   |      |      |      |       |
| RPS6    | ribosomal protein S6                                                                            | -1.7  | -1.9 |      |      | 1.3   |
| RPS6KA1 | ribosomal protein S6 kinase, 90kDa, polypeptide 1                                               | -2.9  | -1.3 |      |      | 3.6   |
| RPS6KB1 | ribosomal protein S6 kinase, 70kDa, polypeptide 1                                               | 1.7   |      |      |      | -1.7  |
| RPS8    | ribosomal protein S8                                                                            | 1.3   |      |      |      |       |
| RQCD1   | RCD1 required for cell differentiation1 homolog (S. pombe)                                      | -2.3  | -1.7 |      |      | -1.4  |
| RRAGA   | Ras-related GTP binding A                                                                       | -2.6  | 1.3  | 1.4  |      | 3.2   |
| RRAGD   | Ras-related GTP binding D                                                                       | 3.0   | -2.4 |      |      | -8.9  |
| RRAS    | related RAS viral (r-ras) oncogene homolog                                                      | 1.7   | 2.6  |      |      | 2.4   |
| RRM1    | ribonucleotide reductase M1 polypeptide                                                         | -1.6  | -1.4 |      |      | -2.1  |
| RRM2    | ribonucleotide reductase M2 polypeptide                                                         | -2.3  |      |      |      | -1.8  |
| RRS1    | RRS1 ribosome biogenesis regulator homolog (S. cerevisiae)                                      | -1.4  |      |      |      | -1.6  |
| RSL1D1  | ribosomal L1 domain containing 1                                                                | -3.8  | -2.1 |      |      |       |
| RTN2    | reticulon 2                                                                                     | 1.6   |      |      |      |       |
| RUNX1   | --                                                                                              | -1.5  | -2.5 | -1.3 |      | -1.4  |
| RUVBL1  | RuvB-like 1 (E. coli)                                                                           | -1.6  |      |      |      | -1.7  |
| RUVBL2  | RuvB-like 2 (E. coli)                                                                           | 1.2   | -1.4 |      |      | -2.0  |
| RW1     | transmembrane protein 131                                                                       | 1.4   | 1.3  |      |      |       |
| RXRA    | retinoid X receptor, alpha                                                                      | 2.4   |      |      |      | -3.3  |
| RYBP    | RING1 and YY1 binding protein                                                                   | 1.4   | 1.3  |      |      | 2.9   |
| RYK     | RYK receptor-like tyrosine kinase                                                               | 11.1  |      |      |      | -22.2 |
| S100A10 | S100 calcium binding protein A10                                                                | -26.4 |      |      |      | 40.6  |
| S100A11 | S100 calcium binding protein A11                                                                | 1.5   |      |      | -1.8 |       |
| S100A4  | S100 calcium binding protein A4                                                                 | -7.7  | -4.0 |      |      | 5.4   |
| SACM1L  | SAC1 suppressor of actin mutations 1-like (yeast)                                               | 1.8   |      |      |      | -1.6  |
| SACS    | spastic ataxia of Charlevoix-Saguenay (sacsin)                                                  | -1.7  | -1.4 |      | -2.0 | -1.4  |
| SAP18   | Sin3A-associated protein, 18kDa                                                                 | -2.2  |      |      |      | 1.7   |
| SAP30   | Sin3A-associated protein, 30kDa                                                                 | 1.7   | 2.3  | 2.2  |      | 3.8   |
| SARA1   | SAR1 gene homolog A (S. cerevisiae)                                                             | 1.6   |      |      |      | -1.7  |
| SARS    | seryl-tRNA synthetase                                                                           | -2.7  | -1.4 | -1.4 |      | 1.8   |
| SAT     | spermidine/spermine N1-acetyltransferase 1                                                      | 5.5   | 3.9  |      |      | 1.3   |
| SATB1   | special AT-rich sequence binding protein 1 (binds to nuclear matrix/scaffold-associating DNA's) | 6.4   | -1.8 | -1.9 | -2.3 | -3.7  |
| SBF1    | SET binding factor 1                                                                            | -1.9  | 3.1  |      |      | 6.9   |
| SC4MOL  | sterol-C4-methyl oxidase-like                                                                   | -3.2  | 1.6  |      | -1.6 | 4.6   |
| SC5DL   | sterol-C5-desaturase (ERG3 delta-5-desaturase homolog, fungal)-like                             | -1.7  |      |      |      | 2.6   |
| SCAMP1  | secretory carrier membrane protein 1                                                            | 1.7   |      |      |      | -1.7  |
| SCAMP5  | secretory carrier membrane protein 5                                                            | 4.4   |      |      |      | -2.6  |
| SCAP    | SREBF chaperone                                                                                 | 1.2   |      |      |      | -1.4  |
| SCARB1  | scavenger receptor class B, member 1                                                            | -1.4  | -4.9 | -1.7 |      | -33.3 |
| SCC-112 | SCC-112 protein                                                                                 | -1.4  | 1.3  |      |      | 1.5   |
| SCHIP1  | schwannomin interacting protein 1                                                               | -5.1  | 1.4  |      |      | 1.9   |
| SCP2    | sterol carrier protein 2                                                                        | -12.0 | 1.6  |      |      | 175.1 |

|          |                                                                                                                  |      |      |      |      |       |
|----------|------------------------------------------------------------------------------------------------------------------|------|------|------|------|-------|
| SCRIB    | scribbled homolog ( <i>Drosophila</i> )                                                                          | 1.5  |      |      | 1.7  |       |
| SCYE1    | small inducible cytokine subfamily E, member 1 (endothelial monocyte-activating)                                 | 1.6  | -1.4 | -1.7 | -1.9 | -2.0  |
| SDCBP    | syndecan binding protein (syntenin)                                                                              | -1.5 | 1.5  | 1.8  |      | 2.5   |
| SDFR1    | neuroplastin                                                                                                     | 1.5  |      |      |      | -1.5  |
| SDHA     | succinate dehydrogenase complex, subunit A, flavoprotein (Fp)                                                    | -1.5 | 2.0  |      |      | 1.9   |
| SDHC     | succinate dehydrogenase complex, subunit C, integral membrane protein, 15kDa                                     | -1.3 |      |      |      | 1.2   |
| SEC13L1  | SEC13 homolog ( <i>S. cerevisiae</i> )                                                                           | -1.2 |      |      |      |       |
| SEC22L1  | SEC22 vesicle trafficking protein homolog B ( <i>S. cerevisiae</i> )                                             | -1.9 |      |      |      | 4.1   |
| SEC23IP  | SEC23 interacting protein                                                                                        | 1.4  |      |      |      | -1.6  |
| SEC24C   | SEC24 related gene family, member C ( <i>S. cerevisiae</i> )                                                     | 1.4  |      |      |      | -1.3  |
| SEC24D   | SEC24 related gene family, member D ( <i>S. cerevisiae</i> )                                                     | 1.5  |      |      |      |       |
| SEC61G   | Sec61 gamma subunit                                                                                              | 2.2  |      |      |      | -2.6  |
| SEC63    | SEC63 homolog ( <i>S. cerevisiae</i> )                                                                           | 1.5  | -1.3 |      | -1.2 | -2.5  |
| SEMA4D   | sema domain, immunoglobulin domain (Ig), transmembrane domain (TM) and short cytoplasmic domain, (semaphorin) 4D | -1.5 |      |      | 1.6  | 2.1   |
| SEN3     | SUMO1/sentrin/SMT3 specific peptidase 3                                                                          | -2.9 | -1.7 | -1.3 | -1.2 |       |
| SEN6     | SUMO1/sentrin specific peptidase 6                                                                               | 2.0  | 1.5  |      |      | 1.2   |
| SEPHS1   | selenophosphate synthetase 1                                                                                     | -1.6 | -2.1 |      |      | -1.7  |
| SEPT2    | septin 2                                                                                                         | -3.6 | -1.5 |      |      | 2.4   |
| SEPT6    | septin 6                                                                                                         | -1.4 | -2.0 |      | -1.6 | -2.7  |
| SEPT7    | septin 7                                                                                                         | 2.6  | 1.3  |      |      | -2.3  |
| SEPT8    | septin 8                                                                                                         | 1.5  | -1.4 |      |      | 4.5   |
| SEPT9    | septin 9                                                                                                         | -2.8 |      |      |      | 2.6   |
| SEPW1    | selenoprotein W, 1                                                                                               | 2.4  | 1.3  |      |      | -1.5  |
| SERP1    | stress-associated endoplasmic reticulum protein 1                                                                | 1.5  | -1.7 |      |      | -1.6  |
| SERPINB1 | serpin peptidase inhibitor, clade B (ovalbumin), member 1                                                        | 40.4 | 3.1  |      |      | -7.4  |
| SERPINH1 | serpin peptidase inhibitor, clade H (heat shock protein 47), member 1, (collagen binding protein 1)              | 18.1 |      |      |      | -17.3 |
| SERTAD2  | SERTA domain containing 2                                                                                        | 1.5  |      |      |      | -1.8  |
| SET      | SET translocation (myeloid leukemia-associated)                                                                  | -1.3 | -1.9 |      |      | -1.5  |
| SF1      | splicing factor 1                                                                                                | -1.6 | -1.4 |      |      |       |
| SF3A1    | splicing factor 3a, subunit 1, 120kDa                                                                            | -1.4 |      |      |      |       |
| SF3A2    | splicing factor 3a, subunit 2, 66kDa                                                                             | -1.5 | -1.6 |      |      |       |
| SF3B1    | splicing factor 3b, subunit 1, 155kDa                                                                            | 1.8  |      | 1.3  |      |       |
| SF3B3    | splicing factor 3b, subunit 3, 130kDa                                                                            | -1.4 | -1.7 |      |      | -2.7  |
| SFN      | stratifin                                                                                                        | -1.7 | -1.8 |      |      |       |
| SFPQ     | splicing factor proline/glutamine-rich (polypyrimidine tract binding protein associated)                         | 1.4  | 1.2  |      |      |       |
| SFRS1    | splicing factor, arginine/serine-rich 1 (splicing factor 2, alternate splicing factor)                           | -1.6 | -1.7 |      |      | -2.4  |
| SFRS10   | splicing factor, arginine/serine-rich 10 (transformer 2 homolog, <i>Drosophila</i> )                             | -1.7 | -1.2 |      |      | -1.3  |
| SFRS11   | splicing factor, arginine/serine-rich 11                                                                         | 2.7  | 4.2  |      |      | -4.1  |
| SFRS12   | splicing factor, arginine/serine-rich 12                                                                         | 4.5  | -1.7 |      |      | -3.5  |
| SFRS2    | splicing factor, arginine/serine-rich 2                                                                          | -1.3 | -1.4 |      |      | -1.5  |
| SFRS2B   | splicing factor, arginine/serine-rich 2B                                                                         | -1.3 | -1.3 |      |      | 1.3   |
| SFRS3    | splicing factor, arginine/serine-rich 3                                                                          | -1.4 | 1.3  |      |      | 1.5   |

|            |                                                                                            |       |      |      |      |       |
|------------|--------------------------------------------------------------------------------------------|-------|------|------|------|-------|
| SFRS4      | splicing factor, arginine/serine-rich 4                                                    | -1.2  |      |      |      |       |
| SFRS6      | splicing factor, arginine/serine-rich 6                                                    | -3.6  |      |      |      | 3.4   |
| SFRS7      | splicing factor, arginine/serine-rich 7, 35kDa                                             | -1.8  | -1.5 |      |      | -1.9  |
| SFRS9      | splicing factor, arginine/serine-rich 9                                                    | -2.7  | 1.2  |      |      | 2.0   |
| SH3GLB1    | SH3-domain GRB2-like endophilin B1                                                         | 1.5   | 2.2  |      |      | 2.5   |
| SHC1       | SHC (Src homology 2 domain containing) transforming protein 1                              | -1.7  |      |      |      |       |
| SHFM1      | split hand/foot malformation (ectrodactyly) type 1                                         | -1.8  |      |      |      |       |
| SHMT1      | serine hydroxymethyltransferase 1 (soluble)                                                | -1.5  | -1.8 |      |      | 1.4   |
| SHMT2      | serine hydroxymethyltransferase 2 (mitochondrial)                                          | -2.3  | -1.8 |      |      |       |
| SIAH1      | seven in absentia homolog 1 (Drosophila)                                                   | -1.5  |      |      |      | 1.5   |
| SIM2       | single-minded homolog 2 (Drosophila)                                                       | 2.4   |      |      |      | -3.1  |
| SIT        | signaling threshold regulating transmembrane adaptor 1                                     | -18.5 |      |      |      |       |
| SIVA       | SIVA1, apoptosis-inducing factor                                                           | -1.6  | -1.7 |      |      | -2.9  |
| SKI        | v-ski sarcoma viral oncogene homolog (avian)                                               | 7.9   |      |      |      | -5.0  |
| SKIP (C62) | skeletal muscle and kidney enriched inositol phosphatase                                   | -1.7  |      |      |      | 2.3   |
| SLA        | Src-like-adaptor                                                                           | 2.1   | 4.4  | 2.8  | 3.1  | 10.8  |
| SLBP       | stem-loop (histone) binding protein                                                        | -1.8  | -1.3 |      |      | -1.8  |
| SLC11A2    | solute carrier family 11 (proton-coupled divalent metal ion transporters), member 2        | 2.1   | -2.1 |      |      | -2.1  |
| SLC12A2    | solute carrier family 12 (sodium/potassium/chloride transporters), member 2                | -1.9  |      |      |      | 1.9   |
| SLC16A1    | solute carrier family 16, member 1 (monocarboxylic acid transporter 1)                     | -1.2  | -2.8 |      |      | -3.9  |
| SLC16A3    | solute carrier family 16, member 3 (monocarboxylic acid transporter 4)                     | 9.6   |      |      |      | -28.1 |
| SLC16A5    | solute carrier family 16, member 5 (monocarboxylic acid transporter 6)                     | 2.4   |      |      |      |       |
| SLC18A2    | solute carrier family 18 (vesicular monoamine), member 2                                   | 4.3   | 1.6  | 4.1  | 4.2  | -6.1  |
| SLC1A4     | solute carrier family 1 (glutamate/neutral amino acid transporter), member 4               | -11.7 | -1.8 | 1.6  |      | 2.2   |
| SLC1A5     | solute carrier family 1 (neutral amino acid transporter), member 5                         | -2.0  | -2.3 | -1.7 |      |       |
| SLC20A1    | solute carrier family 20 (phosphate transporter), member 1                                 | -2.2  | -1.4 |      |      | -2.7  |
| SLC23A2    | solute carrier family 23 (nucleobase transporters), member 2                               | 1.3   | -1.8 |      |      | -2.5  |
| SLC25A11   | solute carrier family 25 (mitochondrial carrier; oxoglutarate carrier), member 11          | -2.4  |      |      |      | 1.7   |
| SLC25A3    | solute carrier family 25 (mitochondrial carrier; phosphate carrier), member 3              | 1.2   |      |      |      |       |
| SLC26A2    | solute carrier family 26 (sulfate transporter), member 2                                   | 2.8   | 1.3  |      |      |       |
| SLC2A3     | solute carrier family 2 (facilitated glucose transporter), member 3                        | -1.9  | 6.0  |      |      | -1.7  |
| SLC30A1    | solute carrier family 30 (zinc transporter), member 1                                      | 2.2   |      |      |      | -1.8  |
| SLC30A9    | solute carrier family 30 (zinc transporter), member 9                                      | 2.1   |      |      |      | -1.5  |
| SLC39A14   | solute carrier family 39 (zinc transporter), member 14                                     | 1.9   | -3.8 | -1.4 | -1.3 | -5.4  |
| SLC39A6    | solute carrier family 39 (zinc transporter), member 6                                      | -1.7  | -1.7 |      | -1.5 |       |
| SLC3A2     | solute carrier family 3 (activators of dibasic and neutral amino acid transport), member 2 | -1.3  |      |      |      |       |
| SLC43A1    | solute carrier family 43, member 1                                                         | 1.8   | -2.0 |      |      | -2.5  |
| SLC6A6     | solute carrier family 6 (neurotransmitter transporter, taurine), member 6                  | 8.8   |      |      |      | -18.0 |
| SLC7A1     | solute carrier family 7 (cationic amino acid transporter, y+ system), member 1             | -2.4  | -2.7 |      | -2.1 | -2.3  |
| SLC7A5     | solute carrier family 7 (cationic amino acid transporter, y+ system), member 5             | -3.9  |      |      |      | 1.5   |
| SLC9A3R1   | solute carrier family 9 (sodium/hydrogen exchanger), member 3 regulator 1                  | 1.6   | -1.4 |      | -1.9 | -2.3  |
| SLK        | STE20-like kinase (yeast)                                                                  | 4.3   |      |      |      | -2.9  |

|         |                                                                                                   |      |      |      |      |      |
|---------|---------------------------------------------------------------------------------------------------|------|------|------|------|------|
| SMAD1   | SMAD family member 1                                                                              | 1.2  | 2.7  |      |      | 1.3  |
| SMAD2   | SMAD family member 2                                                                              | -1.7 | -1.3 |      |      | 1.9  |
| SMAD4   | SMAD family member 4                                                                              | -1.5 | 1.6  |      | -1.4 | 2.2  |
| SMAD5   | SMAD family member 5                                                                              | -1.5 |      |      |      |      |
| SMAD6   | SMAD family member 6                                                                              | 5.6  |      |      |      | -6.8 |
| SMARCA2 | SWI/SNF related, matrix associated, actin dependent regulator of chromatin, subfamily a, member 2 | -1.2 | 2.2  | 1.7  | 1.4  | 7.2  |
| SMARCA3 | helicase-like transcription factor                                                                | -1.4 | -1.4 |      |      | -1.4 |
| SMARCA4 | SWI/SNF related, matrix associated, actin dependent regulator of chromatin, subfamily a, member 4 | -1.9 | -1.6 |      |      |      |
| SMARCB1 | SWI/SNF related, matrix associated, actin dependent regulator of chromatin, subfamily b, member 1 | -1.3 |      |      |      |      |
| SMARCC1 | SWI/SNF related, matrix associated, actin dependent regulator of chromatin, subfamily c, member 1 | -1.4 | -2.2 |      |      | -2.4 |
| SMARCC2 | SWI/SNF related, matrix associated, actin dependent regulator of chromatin, subfamily c, member 2 | -1.5 |      |      |      | 1.2  |
| SMARCD1 | SWI/SNF related, matrix associated, actin dependent regulator of chromatin, subfamily d, member 1 | -1.9 |      |      |      | 1.7  |
| SMARCD2 | SWI/SNF related, matrix associated, actin dependent regulator of chromatin, subfamily d, member 2 | 1.3  | -1.2 |      |      |      |
| SMARCE1 | SWI/SNF related, matrix associated, actin dependent regulator of chromatin, subfamily e, member 1 | -2.2 |      |      |      | 2.0  |
| SMC1L1  | structural maintenance of chromosomes 1A                                                          | -2.2 | -1.2 |      |      |      |
| SMC2L1  | structural maintenance of chromosomes 2                                                           | -2.3 | 1.3  |      |      | -1.3 |
| SMC4L1  | structural maintenance of chromosomes 4                                                           | -1.5 | 1.4  | 1.7  | 1.7  | 6.8  |
| SMG1    | PI-3-kinase-related kinase SMG-1                                                                  | -1.8 |      |      |      | 1.8  |
| SMNDC1  | survival motor neuron domain containing 1                                                         | 1.6  |      |      |      | -1.5 |
| SMPD4   | sphingomyelin phosphodiesterase 4, neutral membrane (neutral sphingomyelinase-3)                  | -1.4 |      |      |      |      |
| SMURF2  | SMAD specific E3 ubiquitin protein ligase 2                                                       | 1.6  | 1.6  |      |      | 1.5  |
| SNAPC3  | small nuclear RNA activating complex, polypeptide 3, 50kDa                                        | -3.2 | 1.3  |      |      | 3.3  |
| SND1    | staphylococcal nuclease and tudor domain containing 1                                             | -1.3 |      |      |      |      |
| SNRK    | SNF related kinase                                                                                | 1.2  |      |      |      |      |
| SNRPA1  | small nuclear ribonucleoprotein polypeptide A'                                                    | -1.4 | -1.4 |      |      | -2.4 |
| SNRPB   | small nuclear ribonucleoprotein polypeptides B and B1                                             | -1.6 | -1.7 |      |      | -2.4 |
| SNRPC   | small nuclear ribonucleoprotein polypeptide C                                                     | -1.3 | -1.5 |      |      | -1.3 |
| SNRPD1  | small nuclear ribonucleoprotein D1 polypeptide 16kDa                                              | -1.9 | -1.7 | -1.4 |      | -2.0 |
| SNRPD2  | small nuclear ribonucleoprotein D2 polypeptide 16.5kDa                                            | -1.2 | -1.2 |      |      |      |
| SNRPD3  | small nuclear ribonucleoprotein D3 polypeptide 18kDa                                              | -1.6 |      |      |      | -1.4 |
| SNRPE   | small nuclear ribonucleoprotein polypeptide E                                                     | -1.3 | -1.3 |      |      |      |
| SNTB2   | syntrophin, beta 2 (dystrophin-associated protein A1, 59kDa, basic component 2)                   | -5.9 | 3.5  | 3.0  | 2.3  | 8.7  |
| SNX1    | sorting nexin 1                                                                                   | 3.6  |      |      |      | -2.4 |
| SNX2    | sorting nexin 2                                                                                   | -1.6 | -1.4 |      |      | 1.4  |
| SNX3    | sorting nexin 3                                                                                   | 1.3  | -1.5 |      |      |      |
| SNX4    | sorting nexin 4                                                                                   | -1.2 |      |      | -1.5 | 1.3  |
| SOCS1   | suppressor of cytokine signaling 1                                                                | -1.6 | 8.3  | 15.6 | 29.3 | 40.4 |
| SOCS2   | suppressor of cytokine signaling 2                                                                | -1.8 | 2.8  |      | 2.8  | 4.7  |
| SOCS5   | suppressor of cytokine signaling 5                                                                | 1.7  | 1.3  |      |      |      |
| SOCS6   | suppressor of cytokine signaling 6                                                                | 1.3  | 1.9  |      |      |      |
| SORD    | sorbitol dehydrogenase                                                                            | -1.3 | -1.6 |      |      | -2.9 |
| SOX4    | SRY (sex determining region Y)-box 4                                                              | -5.7 | -1.3 |      |      | 3.0  |

|            |                                                                                                              |      |      |      |      |       |
|------------|--------------------------------------------------------------------------------------------------------------|------|------|------|------|-------|
| SP100      | SP100 nuclear antigen                                                                                        | -1.7 | 2.3  |      |      | 6.4   |
| SP3        | Sp3 transcription factor                                                                                     | -2.8 |      |      |      | 2.2   |
| SPA17      | sperm autoantigenic protein 17                                                                               | -2.0 |      |      |      | 1.8   |
| SPAG7      | sperm associated antigen 7                                                                                   | -1.6 |      |      |      |       |
| SPAG9      | sperm associated antigen 9                                                                                   | 2.0  | 1.3  |      |      | 1.3   |
| SPAST      | spastin                                                                                                      | 1.3  |      |      |      | -1.2  |
| SPBC25     | spindle pole body component 25 homolog ( <i>S. cerevisiae</i> )                                              | 1.4  |      |      |      | -3.1  |
| SPCS2      | signal peptidase complex subunit 2 homolog ( <i>S. cerevisiae</i> )                                          | 1.3  | -1.3 |      | -1.4 | -1.6  |
| SPHAR      | S-phase response (cyclin-related)                                                                            | 3.4  |      |      |      | -3.2  |
| SPHK2      | sphingosine kinase 2                                                                                         | -1.7 |      |      |      | 1.6   |
| SPINT2     | serine peptidase inhibitor, Kunitz type, 2                                                                   | 4.2  |      | 1.4  |      | -2.6  |
| SPN        | sialophorin (leukosialin, CD43)                                                                              | -1.9 | -1.2 |      |      | 1.7   |
| SPTBN1     | spectrin, beta, non-erythrocytic 1                                                                           | -1.4 | 2.4  |      |      |       |
| SPTLC1     | serine palmitoyltransferase, long chain base subunit 1                                                       | 1.7  |      |      |      | -1.2  |
| SQLE       | squalene epoxidase                                                                                           | -2.0 | -1.4 |      |      | 1.8   |
| SRD5A1     | steroid-5-alpha-reductase, alpha polypeptide 1 (3-oxo-5 alpha-steroid delta 4-dehydrogenase alpha 1)         | 2.0  | 1.2  |      | 3.0  | 4.9   |
| SRF        | serum response factor (c-fos serum response element-binding transcription factor)                            | -1.3 |      | -1.5 |      |       |
| SRI        | sorcin                                                                                                       | 1.5  |      |      | -1.6 | -1.9  |
| SRP14      | signal recognition particle 14kDa (homologous Alu RNA binding protein)                                       | -1.4 |      |      |      | 1.5   |
| SRP72      | signal recognition particle 72kDa                                                                            | 3.8  | -1.5 |      |      | -5.1  |
| SRPK2      | SFRS protein kinase 2                                                                                        | -1.3 | 1.2  |      |      | 1.8   |
| SRR        | serine racemase                                                                                              | -2.1 | -2.2 |      |      |       |
| SRRM2      | serine/arginine repetitive matrix 2                                                                          | -1.9 | -1.4 |      |      | 1.4   |
| SS18       | synovial sarcoma translocation, chromosome 18                                                                | 1.5  |      |      |      | -1.5  |
| SS18L1     | synovial sarcoma translocation gene on chromosome 18-like 1                                                  | 1.6  | -1.5 |      |      | -2.4  |
| SSB        | Sjogren syndrome antigen B (autoantigen La)                                                                  | 1.7  | -1.7 |      | -1.6 | -3.1  |
| SSBP1      | single-stranded DNA binding protein 1                                                                        | 1.3  | -1.8 |      |      | -1.4  |
| SSBP2      | single-stranded DNA binding protein 2                                                                        | -7.6 |      |      |      | 7.2   |
| SSR1       | signal sequence receptor, alpha (translocon-associated protein alpha)                                        | 1.2  |      |      |      | -1.4  |
| SSR4       | signal sequence receptor, delta (translocon-associated protein delta)                                        | 1.7  | -1.3 |      |      | -2.1  |
| SSRP1      | structure specific recognition protein 1                                                                     | -1.8 | -2.2 |      |      | -1.9  |
| ST13       | suppression of tumorigenicity 13 (colon carcinoma) (Hsp70 interacting protein)                               | 1.5  | -1.5 |      |      | -2.2  |
| ST3GAL5    | ST3 beta-galactoside alpha-2,3-sialyltransferase 5                                                           | 4.7  |      | 1.6  |      | -10.8 |
| ST3GAL6    | ST3 beta-galactoside alpha-2,3-sialyltransferase 6                                                           | 13.7 | 1.9  | 2.1  |      | -28.6 |
| ST6GAL1    | ST6 beta-galactosamide alpha-2,6-sialyltransferase 1                                                         | -1.7 |      |      |      | 1.5   |
| ST6GALNAC4 | ST6 (alpha-N-acetylneuraminyl-2,3-beta-galactosyl-1,3)-N-acetylgalactosaminide alpha-2,6-sialyltransferase 4 | -1.7 |      |      | 1.4  | 1.7   |
| STAG1      | stromal antigen 1                                                                                            | -1.4 |      |      |      | 1.2   |
| STAG2      | stromal antigen 2                                                                                            | -1.6 |      |      |      | 1.7   |
| STAM       | signal transducing adaptor molecule (SH3 domain and ITAM motif) 1                                            | 1.6  |      | -1.5 |      | -1.9  |
| STAMBIP    | STAM binding protein                                                                                         | -1.2 |      |      |      | 1.6   |
| STAT1      | signal transducer and activator of transcription 1, 91kDa                                                    | 1.7  | -1.5 |      |      | -4.2  |
| STAT3      | signal transducer and activator of transcription 3 (acute-phase response factor)                             | 3.8  |      | 1.3  |      | -1.4  |

|         |                                                                                   |       |      |      |      |       |
|---------|-----------------------------------------------------------------------------------|-------|------|------|------|-------|
| STAT5A  | signal transducer and activator of transcription 5A                               | 2.7   |      | -1.3 | -1.7 | -3.2  |
| STAU    | stauflen, RNA binding protein, homolog 1 (Drosophila)                             | -1.2  |      |      |      | 1.2   |
| STAU2   | stauflen, RNA binding protein, homolog 2 (Drosophila)                             | -2.9  | 1.6  |      |      | 2.5   |
| STCH    | stress 70 protein chaperone, microsomal-associated, 60kDa                         | 1.6   |      |      |      | -2.5  |
| STIM1   | stromal interaction molecule 1                                                    | -1.4  | 1.9  | 1.9  | 2.0  | 3.4   |
| STIP1   | stress-induced-phosphoprotein 1 (Hsp70/Hsp90-organizing protein)                  | -1.6  | -1.4 | -1.8 |      | -1.3  |
| STK10   | serine/threonine kinase 10                                                        | -1.4  |      |      |      | 1.7   |
| STK24   | serine/threonine kinase 24 (STE20 homolog, yeast)                                 | -2.2  | 1.3  |      |      | 1.8   |
| STK3    | serine/threonine kinase 3 (STE20 homolog, yeast)                                  | -2.2  | 1.5  |      |      | 3.6   |
| STK38   | serine/threonine kinase 38                                                        | -2.3  | 1.7  |      |      | 2.1   |
| STK39   | serine threonine kinase 39 (STE20/SPS1 homolog, yeast)                            | -2.5  | 1.8  |      |      | 3.1   |
| STRAP   | serine/threonine kinase receptor associated protein                               | -1.4  |      |      |      | 2.1   |
| STS     | steroid sulfatase (microsomal), arylsulfatase C, isozyme S                        | -3.6  |      | -1.6 |      | 2.4   |
| STX16   | syntaxin 16                                                                       | 1.5   |      |      |      | 1.5   |
| STX3A   | syntaxin 3                                                                        | 1.7   |      |      |      |       |
| STX6    | syntaxin 6                                                                        | -1.9  |      |      |      | 1.7   |
| STX7    | syntaxin 7                                                                        | 1.5   | 1.3  |      |      | 1.4   |
| STX8    | syntaxin 8                                                                        | -2.6  |      |      |      | 3.2   |
| STXBP1  | syntaxin binding protein 1                                                        | -13.5 |      | 2.0  | 3.8  | 11.7  |
| STXBP3  | syntaxin binding protein 3                                                        | -1.2  | 1.7  |      |      | 1.9   |
| SULT1A1 | sulfotransferase family, cytosolic, 1A, phenol-preferring, member 1               | -1.5  |      |      |      | 2.2   |
| SUMO1   | SMT3 suppressor of mif two 3 homolog 1 (S. cerevisiae)                            | 1.2   | -1.3 |      |      | -2.1  |
| SUMO2   | SMT3 suppressor of mif two 3 homolog 2 (S. cerevisiae)                            | 3.0   |      |      |      | -3.1  |
| SUPT3H  | suppressor of Ty 3 homolog (S. cerevisiae)                                        | -6.4  |      |      |      | 10.6  |
| SUPT4H1 | suppressor of Ty 4 homolog 1 (S. cerevisiae)                                      | -1.7  | 1.6  |      |      | 2.0   |
| SUPT6H  | suppressor of Ty 6 homolog (S. cerevisiae)                                        | 1.8   |      |      |      | -1.5  |
| SURF5   | surfeit 5                                                                         | -1.4  |      |      |      |       |
| SV2A    | synaptic vesicle glycoprotein 2A                                                  | 10.1  | 1.9  | 1.7  | 1.4  | -14.8 |
| SWAP70  | SWAP-70 protein                                                                   | -1.3  | 1.4  | 1.3  |      | 1.6   |
| SYBL1   | synaptobrevin-like 1                                                              | 1.3   | 1.2  |      |      |       |
| SYNCRIP | synaptotagmin binding, cytoplasmic RNA interacting protein                        | -1.7  | -1.6 |      | -1.4 | -1.9  |
| SYNE2   | spectrin repeat containing, nuclear envelope 2                                    | -10.7 | 6.9  | 1.5  |      | 38.9  |
| SYNGR2  | synaptogyrin 2                                                                    | 1.9   |      |      |      | -2.4  |
| SYNJ2   | synaptojanin 2                                                                    | -13.7 |      | 1.9  |      | 48.6  |
| TACC1   | transforming, acidic coiled-coil containing protein 1                             | 2.5   |      |      |      | 1.7   |
| TAF1    | TAF1 RNA polymerase II, TATA box binding protein (TBP)-associated factor, 250kDa  | 1.9   |      |      |      | -1.4  |
| TAF10   | TAF10 RNA polymerase II, TATA box binding protein (TBP)-associated factor, 30kDa  | -1.4  |      |      |      | 1.4   |
| TAF15   | TAF15 RNA polymerase II, TATA box binding protein (TBP)-associated factor, 68kDa  | 1.6   | -1.4 |      |      | -1.7  |
| TAF1A   | TATA box binding protein (TBP)-associated factor, RNA polymerase I, A, 48kDa      | -2.1  | -1.8 |      |      |       |
| TAF1C   | TATA box binding protein (TBP)-associated factor, RNA polymerase I, C, 110kDa     | 1.8   |      |      |      | -1.6  |
| TAF2    | TAF2 RNA polymerase II, TATA box binding protein (TBP)-associated factor, 150kDa  | -1.3  |      |      |      | 1.6   |
| TAF4B   | TAF4b RNA polymerase II, TATA box binding protein (TBP)-associated factor, 105kDa | -1.3  |      |      |      | -2.3  |

|          |                                                                                 |      |      |      |      |      |
|----------|---------------------------------------------------------------------------------|------|------|------|------|------|
| TAF9     | TAF9 RNA polymerase II, TATA box binding protein (TBP)-associated factor, 32kDa | 2.2  |      |      |      | -3.2 |
| TAGLN2   | transgelin 2                                                                    | -3.0 |      | -1.4 |      |      |
| TAL1     | T-cell acute lymphocytic leukemia 1                                             | 1.7  |      | 1.6  |      | -2.3 |
| TALDO1   | transaldolase 1                                                                 | 1.8  |      |      |      | -1.7 |
| TANK     | TRAF family member-associated NFKB activator                                    | 2.1  | 1.4  |      |      | -1.3 |
| TAOK3    | TAO kinase 3                                                                    | 2.3  | -1.4 |      |      | -2.9 |
| TAPBP    | TAP binding protein (tapasin)                                                   | -1.8 | -1.3 |      |      | 1.2  |
| TARDBP   | TAR DNA binding protein                                                         | 1.9  | -1.2 |      |      | -1.3 |
| TAX1BP1  | Tax1 (human T-cell leukemia virus type I) binding protein 1                     | 4.5  | 1.4  | 1.5  |      | -2.6 |
| TAX1BP3  | Tax1 (human T-cell leukemia virus type I) binding protein 3                     | -2.1 | 3.3  |      |      | 4.2  |
| TBC1D22A | TBC1 domain family, member 22A                                                  | -1.5 |      |      |      | -1.2 |
| TBPL1    | TBP-like 1                                                                      | -1.6 |      |      |      | 1.5  |
| TCEA1    | transcription elongation factor A (SII), 1                                      | -1.7 |      |      |      | 1.5  |
| TCEAL1   | transcription elongation factor A (SII)-like 1                                  | 1.8  |      |      |      | -1.4 |
| TCEB1    | transcription elongation factor B (SIII), polypeptide 1 (15kDa, elongin C)      | -1.6 | 1.4  |      |      |      |
| TCEB2    | transcription elongation factor B (SIII), polypeptide 2 (18kDa, elongin B)      | -2.9 |      |      |      | 1.4  |
| TCERG1   | transcription elongation regulator 1                                            | -1.4 | -1.4 |      | -1.4 | -1.4 |
| TCF12    | transcription factor 12 (HTF4, helix-loop-helix transcription factors 4)        | -2.5 | -2.0 |      |      | 2.8  |
| TCF3     | transcription factor 3 (E2A immunoglobulin enhancer binding factors E12/E47)    | -4.7 |      |      |      | 4.7  |
| TCFL5    | transcription factor-like 5 (basic helix-loop-helix)                            | -2.5 | 2.1  |      |      | 2.8  |
| TCP1     | t-complex 1                                                                     | -1.3 | -1.5 |      | -1.7 | -1.6 |
| TCTEL1   | dynein, light chain, Tctex-type 1                                               | 1.2  | 1.5  |      |      |      |
| TDRD7    | tudor domain containing 7                                                       | -2.6 |      |      |      | 5.6  |
| TEGT     | testis enhanced gene transcript (BAX inhibitor 1)                               | 1.2  | 1.4  |      |      | 1.3  |
| TERF1    | telomeric repeat binding factor (NIMA-interacting) 1                            | -1.6 |      |      |      | 2.0  |
| TERF2    | telomeric repeat binding factor 2                                               | -1.5 |      |      |      | 1.4  |
| TES      | testis derived transcript (3 LIM domains)                                       | 1.4  |      |      |      |      |
| TFAM     | transcription factor A, mitochondrial                                           | -1.4 | -1.8 |      | -1.8 | -2.0 |
| TFCP2    | transcription factor CP2                                                        | -1.5 | -1.9 |      |      | 1.8  |
| TFDP1    | transcription factor Dp-1                                                       | -1.8 | -1.3 |      |      | -1.6 |
| TFDP2    | transcription factor Dp-2 (E2F dimerization partner 2)                          | 3.1  | -1.4 | -1.5 |      |      |
| TFPI     | tissue factor pathway inhibitor (lipoprotein-associated coagulation inhibitor)  | 4.9  | 9.6  | 3.1  | 1.9  | 24.6 |
| TGFB1    | transforming growth factor, beta 1 (Camurati-Engelmann disease)                 | 32.0 |      |      |      | -3.3 |
| TGFBR2   | transforming growth factor, beta receptor II (70/80kDa)                         | -3.3 | 1.8  | 2.8  | 4.0  | 6.9  |
| TGIF2    | TGFB-induced factor 2 (TALE family homeobox)                                    | 1.9  | -1.6 |      |      | -2.9 |
| TGOLN2   | trans-golgi network protein 2                                                   | 1.3  | 1.2  |      |      | -1.6 |
| THOC2    | THO complex 2                                                                   | 1.5  | 1.6  |      |      | -1.5 |
| THRAP1   | thyroid hormone receptor associated protein 1                                   | 1.9  | 1.5  |      |      | -1.3 |
| THRAP2   | thyroid hormone receptor associated protein 2                                   | -1.5 | 4.2  |      |      | 2.3  |
| TIA1     | TIA1 cytotoxic granule-associated RNA binding protein                           | -1.7 | -1.3 |      |      | 1.8  |
| TIAL1    | TIA1 cytotoxic granule-associated RNA binding protein-like 1                    | 1.7  | -1.4 |      |      | -2.0 |
| TIF1     | tripartite motif-containing 24                                                  | 1.6  |      |      |      | -1.5 |

|           |                                                                                           |      |      |      |      |       |
|-----------|-------------------------------------------------------------------------------------------|------|------|------|------|-------|
| TIMM17A   | translocase of inner mitochondrial membrane 17 homolog A (yeast)                          | -1.2 | -1.5 |      | -1.5 | -1.6  |
| TIMP2     | TIMP metalloproteinase inhibitor 2                                                        | 2.1  |      |      |      | -3.0  |
| TIP120A   | cullin-associated and neddylation-dissociated 1                                           | 1.6  | -1.3 |      |      | -1.4  |
| TKT       | transketolase (Wernicke-Korsakoff syndrome)                                               | 1.5  | -1.3 |      |      | -1.8  |
| TLE1      | transducin-like enhancer of split 1 (E(sp1) homolog, Drosophila)                          | -2.0 | 5.6  |      |      | 7.4   |
| TLE4      | transducin-like enhancer of split 4 (E(sp1) homolog, Drosophila)                          | -1.4 | -1.5 |      |      | 1.7   |
| TLK1      | tousled-like kinase 1                                                                     | 1.7  | 1.4  |      |      |       |
| TLK2      | tousled-like kinase 2                                                                     | 1.7  |      |      |      |       |
| TLN1      | talin 1                                                                                   | -1.6 |      | 1.4  |      | 2.6   |
| TM2D1     | TM2 domain containing 1                                                                   | 1.6  | 1.8  |      |      | 1.8   |
| TM4SF2    | tetraspanin 7                                                                             | 35.8 | 4.8  |      |      | -11.4 |
| TMED7     | transmembrane emp24 protein transport domain containing 7                                 | 1.6  | 1.7  |      |      |       |
| TMED9     | transmembrane emp24 protein transport domain containing 9                                 | 1.8  |      |      |      | -2.4  |
| TMEM1     | transmembrane protein 1                                                                   | -1.4 |      |      |      | 1.5   |
| TMEM11    | transmembrane protein 11                                                                  | -1.7 |      |      |      |       |
| TMEM4     | transmembrane protein 4                                                                   | 1.9  | -1.5 |      |      | -3.3  |
| TMEM87A   | transmembrane protein 87A                                                                 | 1.2  | 1.3  |      |      |       |
| TMF1      | TATA element modulatory factor 1                                                          | 2.1  | 1.7  | -1.2 |      | -2.2  |
| TMP21     | transmembrane emp24-like trafficking protein 10 (yeast)                                   | 1.5  |      |      |      | 2.0   |
| TMPO      | thymopoietin                                                                              | -2.2 | 1.4  |      |      | 1.7   |
| TMSB10    | thymosin, beta 10                                                                         | -1.9 | 1.6  | 1.4  | 2.2  | 3.2   |
| TMSL8     | thymosin-like 8                                                                           | -5.4 |      |      |      | 2.0   |
| TNFAIP8   | tumor necrosis factor, alpha-induced protein 8                                            | -1.5 | -1.9 | -1.3 |      | -1.9  |
| TNFRSF10D | tumor necrosis factor receptor superfamily, member 10d, decoy with truncated death domain | 1.3  |      |      |      | -2.0  |
| TNFRSF1A  | tumor necrosis factor receptor superfamily, member 1A                                     | 2.9  |      |      |      | -5.7  |
| TNKS      | tankyrase, TRF1-interacting ankyrin-related ADP-ribose polymerase                         | -1.7 | 2.5  |      |      | 1.3   |
| TNPO1     | transportin 1                                                                             | -1.4 | 1.4  |      |      | -1.6  |
| TNPO3     | transportin 3                                                                             | 1.4  |      |      |      |       |
| TOB1      | transducer of ERBB2, 1                                                                    | 1.9  | -1.6 | 1.6  |      |       |
| TOB2      | transducer of ERBB2, 2                                                                    | 1.9  | 1.4  |      |      |       |
| TOMM20    | translocase of outer mitochondrial membrane 20 homolog (yeast)                            | 2.0  |      | -1.5 |      | -2.1  |
| TOP2B     | topoisomerase (DNA) II beta 180kDa                                                        | -1.9 |      |      |      | 1.4   |
| TOPBP1    | topoisomerase (DNA) II binding protein 1                                                  | -1.2 |      |      |      | -1.5  |
| TOX       | thymus high mobility group box protein TOX                                                | 26.1 | -1.6 | -1.3 |      | -32.2 |
| TP53      | tumor protein p53 (Li-Fraumeni syndrome)                                                  | -2.6 | -2.5 |      |      |       |
| TP53BP2   | tumor protein p53 binding protein, 2                                                      | 2.0  |      |      | 1.7  |       |
| TPD52L2   | tumor protein D52-like 2                                                                  | -1.6 |      |      |      | 1.4   |
| TPI1      | triosephosphate isomerase 1                                                               | -1.5 | -1.5 |      |      |       |
| TPMT      | thiopurine S-methyltransferase                                                            | 1.8  |      |      |      | -2.2  |
| TPP1      | tripeptidyl peptidase I                                                                   | 1.7  | 1.4  |      |      | -1.3  |
| TPP2      | tripeptidyl peptidase II                                                                  | -1.3 |      |      |      | -1.3  |
| TPR       | translocated promoter region (to activated MET oncogene)                                  | 1.4  | -1.3 |      |      | -1.6  |

|          |                                                                         |       |      |      |      |       |
|----------|-------------------------------------------------------------------------|-------|------|------|------|-------|
| TPST2    | tyrosylprotein sulfotransferase 2                                       | -1.7  | 2.0  |      |      | 2.9   |
| TRA@     | T cell receptor alpha locus                                             | -38.6 | -1.9 |      | 2.9  | 24.7  |
| TRA1     | heat shock protein 90kDa beta (Grp94), member 1                         | 1.4   |      |      |      | -2.2  |
| TRA2A    | transformer-2 alpha                                                     | 2.6   |      |      |      | -2.3  |
| TRAF3    | TNF receptor-associated factor 3                                        | 2.8   |      |      |      | -7.4  |
| TRAF3IP2 | TRAF3 interacting protein 2                                             | -5.3  |      |      |      | 3.8   |
| TRAF4    | TNF receptor-associated factor 4                                        | -13.8 | -1.7 | -1.7 | -1.5 |       |
| TRAM1    | translocation associated membrane protein 1                             | 3.3   |      |      |      | -2.3  |
| TRAM2    | translocation associated membrane protein 2                             | -2.0  | 2.4  | 1.5  | 1.7  | 2.0   |
| TRAPPC3  | trafficking protein particle complex 3                                  | 1.4   |      |      |      | -1.4  |
| TRFP     | Trf (TATA binding protein-related factor)-proximal homolog (Drosophila) | -1.7  | -1.4 |      |      |       |
| TRIB2    | tribbles homolog 2 (Drosophila)                                         | 6.1   |      |      |      | -6.0  |
| TRIM14   | tripartite motif-containing 14                                          | 3.2   | -2.4 |      |      | -4.7  |
| TRIM33   | tripartite motif-containing 33                                          | -1.6  |      |      |      | -1.2  |
| TRIM37   | tripartite motif-containing 37                                          | 1.8   | -1.3 |      |      | -14.1 |
| TRIP12   | thyroid hormone receptor interactor 12                                  | 1.6   | 1.5  |      |      | 2.3   |
| TRRAP    | transformation/transcription domain-associated protein                  | -1.7  |      |      |      | 2.1   |
| TSC2     | tuberous sclerosis 2                                                    | -1.8  | 1.5  |      |      | 6.8   |
| TSC22D1  | TSC22 domain family, member 1                                           | 2.0   | 2.9  |      |      | -2.4  |
| TSC22D3  | TSC22 domain family, member 3                                           | 5.2   | 17.5 | 33.1 | 20.4 | 20.0  |
| TSFM     | Ts translation elongation factor, mitochondrial                         | -1.2  | -2.5 | -1.5 | -1.6 | -1.6  |
| TSNAX    | translin-associated factor X                                            | 1.2   | 1.9  | 2.1  | 2.2  | 2.0   |
| TSPAN5   | tetraspanin 5                                                           | 3.2   |      | 2.1  |      |       |
| TSR1     | TSR1, 20S rRNA accumulation, homolog (S. cerevisiae)                    | -2.0  | -2.4 | -2.0 | -2.0 | -1.8  |
| TTC3     | tetratricopeptide repeat domain 3                                       | 2.3   | -1.6 |      |      | -5.1  |
| TTF1     | transcription termination factor, RNA polymerase I                      | -2.7  | -1.3 |      |      | 1.8   |
| TTF2     | transcription termination factor, RNA polymerase II                     | -1.2  |      |      |      |       |
| TUBA1    | tubulin, alpha 1                                                        | -4.4  | 2.1  | 10.4 | 3.0  | 13.5  |
| TUBA3    | tubulin, alpha 3                                                        | -10.6 | 1.7  |      | -1.6 | 15.1  |
| TUBB     | tubulin, beta                                                           | -1.6  |      |      |      |       |
| TUBB2A   | tubulin, beta 2A                                                        | -25.5 | 3.2  |      |      | 54.6  |
| TUBB2C   | tubulin, beta 2C                                                        | -1.3  | 1.4  |      |      |       |
| TUBB3    | tubulin, beta 3                                                         | -1.8  |      |      |      |       |
| TUBGCP3  | tubulin, gamma complex associated protein 3                             | -1.4  |      |      |      | -1.7  |
| TUFM     | Tu translation elongation factor, mitochondrial                         | -1.5  | -1.5 |      | -1.3 |       |
| TXLNA    | taxilin alpha                                                           | 1.2   |      |      |      | -2.0  |
| TXN      | thioredoxin                                                             | 1.8   | 1.3  |      | 1.7  | -1.5  |
| TXN2     | thioredoxin 2                                                           | -1.4  |      |      |      |       |
| TXNDC9   | thioredoxin domain containing 9                                         | 1.5   |      |      |      | -1.2  |
| TXNIP    | thioredoxin interacting protein                                         | 10.0  | 7.7  | 2.8  | 3.7  | 2.1   |
| TXNL1    | thioredoxin-like 1                                                      | 1.3   | -2.1 |      |      | -1.4  |
| TXNRD1   | thioredoxin reductase 1                                                 | -1.3  |      |      | -1.4 |       |

|         |                                                                                                      |      |      |      |      |      |
|---------|------------------------------------------------------------------------------------------------------|------|------|------|------|------|
| TYMS    | thymidylate synthetase                                                                               | 2.1  | -1.2 |      |      | -4.8 |
| U2AF2   | U2 small nuclear RNA auxiliary factor 2                                                              | -1.3 |      |      |      |      |
| UAP1    | UDP-N-acetylglucosamine pyrophosphorylase 1                                                          | 1.8  | -2.3 | -1.3 | -1.5 | -3.9 |
| UBB     | ubiquitin B                                                                                          | -1.6 | 1.7  |      |      | 1.5  |
| UBE1    | ubiquitin-activating enzyme E1 (A1S9T and BN75 temperature sensitivity complementing)                | -1.3 | -1.4 |      |      |      |
| UBE1L   | ubiquitin-activating enzyme E1-like                                                                  | -1.5 | -1.4 |      |      | 1.8  |
| UBE2C   | ubiquitin-conjugating enzyme E2C                                                                     | 1.3  | 1.7  |      |      |      |
| UBE2D1  | ubiquitin-conjugating enzyme E2D 1 (UBC4/5 homolog, yeast)                                           | -1.3 |      |      |      | 1.3  |
| UBE2D2  | ubiquitin-conjugating enzyme E2D 2 (UBC4/5 homolog, yeast)                                           | -1.9 | 1.6  |      |      | 4.1  |
| UBE2D3  | ubiquitin-conjugating enzyme E2D 3 (UBC4/5 homolog, yeast)                                           | -1.3 | 1.3  |      | -1.3 | 1.6  |
| UBE2E1  | ubiquitin-conjugating enzyme E2E 1 (UBC4/5 homolog, yeast)                                           | 1.4  |      |      |      | -1.8 |
| UBE2E3  | ubiquitin-conjugating enzyme E2E 3 (UBC4/5 homolog, yeast)                                           | 2.2  |      |      |      | -2.1 |
| UBE2G1  | ubiquitin-conjugating enzyme E2G 1 (UBC7 homolog, yeast)                                             | -1.6 |      |      |      |      |
| UBE2I   | ubiquitin-conjugating enzyme E2I (UBC9 homolog, yeast)                                               | -4.5 | -1.2 |      |      | 2.8  |
| UBE2J1  | ubiquitin-conjugating enzyme E2, J1 (UBC6 homolog, yeast)                                            | 1.5  | 1.5  |      |      | -1.5 |
| UBE2L3  | ubiquitin-conjugating enzyme E2L 3                                                                   | 1.5  | -2.1 |      |      | -2.1 |
| UBE2L6  | ubiquitin-conjugating enzyme E2L 6                                                                   | -2.0 | -1.7 | -1.2 | -1.3 |      |
| UBE2N   | ubiquitin-conjugating enzyme E2N (UBC13 homolog, yeast)                                              | -1.4 | -1.3 |      |      |      |
| UBE2V2  | ubiquitin-conjugating enzyme E2 variant 2                                                            | -1.4 | -1.3 |      |      | -1.7 |
| UBE3A   | ubiquitin protein ligase E3A (human papilloma virus E6-associated protein, Angelman syndrome)        | -5.8 | 1.4  | -1.4 |      | 8.6  |
| UBE3C   | ubiquitin protein ligase E3C                                                                         | -1.3 |      |      |      |      |
| UBE4B   | ubiquitination factor E4B (UFD2 homolog, yeast)                                                      | 1.3  |      |      |      | -1.3 |
| UBN1    | ubinuclen 1                                                                                          | -1.8 | -1.2 |      |      | 1.3  |
| UBTF    | upstream binding transcription factor, RNA polymerase I                                              | -1.2 | -1.3 | -1.3 |      | -1.4 |
| UCK2    | uridine-cytidine kinase 2                                                                            | -1.7 | -1.4 |      |      | -3.0 |
| UCP2    | uncoupling protein 2 (mitochondrial, proton carrier)                                                 | 1.3  |      |      |      |      |
| UGCG    | UDP-glucose ceramide glucosyltransferase                                                             | -2.4 | 1.2  |      |      | 3.0  |
| UMPS    | uridine monophosphate synthetase (orotate phosphoribosyl transferase and orotidine-5'-decarboxylase) | -1.3 |      | -1.3 |      | -1.6 |
| UPF2    | UPF2 regulator of nonsense transcripts homolog (yeast)                                               | 2.2  |      |      |      | -2.0 |
| UPF3A   | UPF3 regulator of nonsense transcripts homolog A (yeast)                                             | -1.4 |      |      |      | 1.4  |
| UQCR    | ubiquinol-cytochrome c reductase, 6.4kDa subunit                                                     | -1.3 |      |      |      |      |
| UQCRC2  | ubiquinol-cytochrome c reductase core protein II                                                     | -1.6 |      |      |      | 1.8  |
| UQCRFS1 | ubiquinol-cytochrome c reductase, Rieske iron-sulfur polypeptide 1                                   | 1.2  |      |      |      | -1.6 |
| UQCRH   | ubiquinol-cytochrome c reductase hinge protein                                                       | 1.5  |      |      |      | -1.9 |
| UROD    | uroporphyrinogen decarboxylase                                                                       | 2.2  |      |      |      | -2.4 |
| UROS    | uroporphyrinogen III synthase (congenital erythropoietic porphyria)                                  | 2.4  | 1.6  |      |      | -6.2 |
| USF2    | upstream transcription factor 2, c-fos interacting                                                   | -1.5 |      |      |      | 1.6  |
| USP1    | ubiquitin specific peptidase 1                                                                       | -1.5 |      |      | -1.4 |      |
| USP11   | ubiquitin specific peptidase 11                                                                      | -1.6 | 1.3  |      |      | 1.4  |
| USP12   | ubiquitin specific peptidase 12                                                                      | -2.0 | 2.3  |      |      | 3.7  |
| USP14   | ubiquitin specific peptidase 14 (tRNA-guanine transglycosylase)                                      | 1.3  | -1.3 |      |      | -1.7 |
| USP22   | ubiquitin specific peptidase 22                                                                      | -2.6 |      |      |      | 2.7  |

|        |                                                                        |        |      |      |      |       |
|--------|------------------------------------------------------------------------|--------|------|------|------|-------|
| USP24  | ubiquitin specific peptidase 24                                        | 1.4    | 1.3  |      |      | -1.3  |
| USP32  | ubiquitin specific peptidase 32                                        | 3.1    |      |      |      | -2.2  |
| USP33  | ubiquitin specific peptidase 33                                        | 1.5    | 1.3  |      |      |       |
| USP34  | ubiquitin specific peptidase 34                                        | 1.3    | 1.8  |      |      | 2.6   |
| USP4   | ubiquitin specific peptidase 4 (proto-oncogene)                        | -1.7   | 1.3  |      |      | 2.4   |
| USP46  | ubiquitin specific peptidase 46                                        | 3.5    |      |      |      | -3.0  |
| USP6   | ubiquitin specific peptidase 6 (Tre-2 oncogene)                        | 1.4    | -1.3 |      |      |       |
| USP7   | ubiquitin specific peptidase 7 (herpes virus-associated)               | -3.0   |      |      |      | 2.6   |
| UTX    | ubiquitously transcribed tetratricopeptide repeat, X chromosome        | -1.6   | 1.4  |      |      | 2.9   |
| UVRAG  | UV radiation resistance associated gene                                | 1.6    |      |      | 1.5  |       |
| VAMP2  | vesicle-associated membrane protein 2 (synaptobrevin 2)                | -4.2   | -1.3 |      |      | 4.9   |
| VAMP3  | vesicle-associated membrane protein 3 (cellubrevin)                    | 1.3    | 1.3  |      |      | 1.5   |
| VAMP4  | vesicle-associated membrane protein 4                                  | -2.6   |      |      |      | 2.7   |
| VAMP8  | vesicle-associated membrane protein 8 (endobrevin)                     | 2.0    |      |      |      | -4.1  |
| VAPA   | VAMP (vesicle-associated membrane protein)-associated protein A, 33kDa | 1.3    |      |      |      | -1.7  |
| VCL    | vinculin                                                               | 1.9    | -1.5 |      | 1.9  | -1.4  |
| VCP    | valosin-containing protein                                             | 1.3    | -1.3 |      |      | -1.4  |
| VDAC1  | voltage-dependent anion channel 1                                      | 1.6    |      | -1.6 | -1.7 | -3.1  |
| VDAC2  | voltage-dependent anion channel 2                                      | 1.9    |      |      | -1.5 | -2.1  |
| VDAC3  | voltage-dependent anion channel 3                                      | 1.8    |      |      |      | -1.9  |
| VDP    | vesicle docking protein p115                                           | 2.0    |      |      |      | -1.6  |
| VEGF   | vascular endothelial growth factor A                                   | 8.2    | -2.4 | -1.5 |      | -13.8 |
| VEGFB  | vascular endothelial growth factor B                                   | -2.5   |      |      |      |       |
| VGLL4  | vestigial like 4 (Drosophila)                                          | 1.3    |      |      |      |       |
| VIL2   | villin 2 (ezrin)                                                       | -2.2   | 2.4  |      |      | 9.8   |
| VIM    | vimentin                                                               | -275.9 | 1.2  |      |      | 360.4 |
| VLDLR  | very low density lipoprotein receptor                                  | -4.7   | -1.2 |      |      | 2.6   |
| VPS11  | vacuolar protein sorting 11 homolog (S. cerevisiae)                    | 1.6    |      |      |      |       |
| VPS13A | vacuolar protein sorting 13 homolog A (S. cerevisiae)                  | 3.7    |      |      | -1.3 | -2.8  |
| VPS26  | vacuolar protein sorting 26 homolog A (yeast)                          | 1.5    | 1.3  |      |      |       |
| VTI1B  | vesicle transport through interaction with t-SNAREs homolog 1B (yeast) | 1.7    | 1.3  |      |      | -1.7  |
| WARS   | tryptophanyl-tRNA synthetase                                           | -1.5   | -3.3 |      |      | -1.8  |
| WBP4   | WW domain binding protein 4 (formin binding protein 21)                | -1.2   |      |      |      | 1.5   |
| WBSCR1 | eukaryotic translation initiation factor 4H                            | -2.4   |      |      |      | 1.5   |
| WDR1   | WD repeat domain 1                                                     | -2.5   |      |      |      | 2.8   |
| WEE1   | WEE1 homolog (S. pombe)                                                | -1.4   | 1.2  |      |      |       |
| WIT-1  | Wilms tumor upstream neighbor 1                                        | -2.4   |      |      |      | 2.5   |
| WSB1   | WD repeat and SOCS box-containing 1                                    | 9.0    | 2.0  |      |      | -2.0  |
| WSB2   | WD repeat and SOCS box-containing 2                                    | 1.4    | 1.3  |      |      | -1.7  |
| WT1    | Wilms tumor 1                                                          | -1.6   | 1.4  | -1.5 | -1.8 | -1.7  |
| WTAP   | Wilms tumor 1 associated protein                                       | -1.5   | 1.7  |      |      | 1.8   |
| WWOX   | WW domain containing oxidoreductase                                    | -1.4   | -1.7 |      |      |       |

|          |                                                                                                                               |        |      |      |      |        |
|----------|-------------------------------------------------------------------------------------------------------------------------------|--------|------|------|------|--------|
| XAB1     | XPA binding protein 1, GTPase                                                                                                 | -1.6   |      |      |      | 1.6    |
| XIST     | X (inactive)-specific transcript                                                                                              | -808.5 |      |      |      | 1094.1 |
| XPNPEP1  | X-prolyl aminopeptidase (aminopeptidase P) 1, soluble                                                                         | 3.2    |      |      |      | -3.9   |
| XPO1     | exportin 1 (CRM1 homolog, yeast)                                                                                              | -1.4   |      |      |      | 4.3    |
| XPO7     | exportin 7                                                                                                                    | 4.8    | 1.3  |      |      | -2.7   |
| XPOT     | exportin, tRNA (nuclear export receptor for tRNAs)                                                                            | 1.6    | -3.2 |      |      | -6.4   |
| XRCC3    | X-ray repair complementing defective repair in Chinese hamster cells 3                                                        | -1.7   |      |      |      |        |
| XRCC4    | X-ray repair complementing defective repair in Chinese hamster cells 4                                                        | -1.8   | 1.4  |      |      | 1.6    |
| XRCC5    | X-ray repair complementing defective repair in Chinese hamster cells 5 (double-strand-break rejoining; Ku autoantigen, 80kDa) | -2.0   | -1.7 |      |      |        |
| YAF2     | YY1 associated factor 2                                                                                                       | 1.7    | 1.9  | 1.8  | 1.6  | 5.8    |
| YARS     | tyrosyl-tRNA synthetase                                                                                                       | -1.9   | -2.6 |      |      | -2.4   |
| YES1     | v-yes-1 Yamaguchi sarcoma viral oncogene homolog 1                                                                            | 49.1   |      |      | 1.3  | -63.8  |
| YME1L1   | YME1-like 1 ( <i>S. cerevisiae</i> )                                                                                          | 1.7    | -1.2 |      |      | -1.7   |
| YWHAE    | tyrosine 3-monooxygenase/tryptophan 5-monooxygenase activation protein, epsilon polypeptide                                   | -2.5   | -1.6 |      |      | 2.2    |
| YWHAQ    | tyrosine 3-monooxygenase/tryptophan 5-monooxygenase activation protein, theta polypeptide                                     | -1.7   | 1.6  |      |      | 1.5    |
| YWHAZ    | tyrosine 3-monooxygenase/tryptophan 5-monooxygenase activation protein, zeta polypeptide                                      | -2.5   | 1.7  |      |      | 3.9    |
| YY1      | YY1 transcription factor                                                                                                      | 2.7    |      |      |      | -2.7   |
| ZAP70    | zeta-chain (TCR) associated protein kinase 70kDa                                                                              | -10.1  |      |      | -1.3 | 13.8   |
| ZBTB1    | zinc finger and BTB domain containing 1                                                                                       | -1.4   |      |      |      | 1.6    |
| ZC3HAV1  | zinc finger CCCH-type, antiviral 1                                                                                            | -1.7   | 1.4  |      |      | 2.6    |
| ZFP36L1  | zinc finger protein 36, C3H type-like 1                                                                                       | -24.5  |      |      |      | 11.5   |
| ZFP36L2  | zinc finger protein 36, C3H type-like 2                                                                                       | 2.2    | 1.8  | 3.0  | 2.5  |        |
| ZFX      | zinc finger protein, X-linked                                                                                                 | -1.6   |      |      |      | 1.7    |
| ZHX2     | zinc fingers and homeoboxes 2                                                                                                 | -5.1   | 1.3  |      |      | 6.9    |
| ZHX3     | zinc fingers and homeoboxes 3                                                                                                 | 2.0    | 2.0  |      |      |        |
| ZMPSTE24 | zinc metalloproteinase (STE24 homolog, yeast)                                                                                 | 1.4    |      |      |      | -1.8   |
| ZMYND11  | zinc finger, MYND domain containing 11                                                                                        | 2.6    | 1.3  |      |      |        |
| ZNF143   | zinc finger protein 143                                                                                                       | -1.4   |      |      |      |        |
| ZNF148   | zinc finger protein 148                                                                                                       | 1.8    | 1.8  | 1.3  |      | -1.6   |
| ZNF160   | zinc finger protein 160                                                                                                       | -1.7   | 1.5  |      |      | 1.6    |
| ZNF161   | vascular endothelial zinc finger 1                                                                                            | -1.9   |      |      |      | 2.2    |
| ZNF175   | zinc finger protein 175                                                                                                       | 2.9    |      |      |      | -2.6   |
| ZNF198   | zinc finger, MYM-type 2                                                                                                       | 4.3    | -1.3 |      |      | -2.5   |
| ZNF202   | zinc finger protein 202                                                                                                       | -1.4   | -1.8 |      |      |        |
| ZNF207   | zinc finger protein 207                                                                                                       | 2.4    | -1.4 |      |      |        |
| ZNF22    | zinc finger protein 22 (KOX 15)                                                                                               | -1.3   |      |      |      | 1.3    |
| ZNF238   | zinc finger protein 238                                                                                                       | -5.5   |      |      |      | 6.3    |
| ZNF259   | zinc finger protein 259                                                                                                       | -1.2   |      | -1.4 | -1.8 | -1.6   |
| ZNF263   | zinc finger protein 263                                                                                                       | -1.7   | -1.7 |      |      | 1.8    |
| ZNF267   | zinc finger protein 267                                                                                                       | 1.9    |      |      |      | -1.9   |
| ZNF291   | zinc finger protein 291                                                                                                       | 1.4    | 1.6  |      |      | 2.1    |
| ZNF318   | zinc finger protein 318                                                                                                       | 2.3    | 1.3  |      |      |        |

|         |                                      |      |      |  |  |      |
|---------|--------------------------------------|------|------|--|--|------|
| ZNF354A | zinc finger protein 354A             | 2.6  |      |  |  |      |
| ZNF364  | zinc finger protein 364              | 1.3  | 1.8  |  |  | 3.0  |
| ZNF384  | zinc finger protein 384              | -1.6 | -1.6 |  |  |      |
| ZNF423  | zinc finger protein 423              | -3.6 | -2.2 |  |  | 5.6  |
| ZNF451  | zinc finger protein 451              | 2.5  |      |  |  | -1.6 |
| ZNF592  | zinc finger protein 592              | -1.7 | 1.3  |  |  | 1.4  |
| ZNF91   | zinc finger protein 91               | -2.2 |      |  |  | 2.2  |
| ZNFN1A1 | IKAROS family zinc finger 1 (Ikaros) | 2.2  | 1.3  |  |  | 2.2  |
| ZRF1    | zuotin related factor 1              | 1.4  | -1.5 |  |  | -2.9 |
| ZUBR1   | zinc finger, UBR1 type 1             | 2.0  |      |  |  | -1.9 |
